# Supplementary material for: Cross-sectional study of association between psychosocial stressors with chronic kidney disease among migrant and non-migrant Ghanaians living in Europe and Ghana: the RODAM study
Source: PubMed Central journal article supplement (PMC6688695; doi:10.1136/bmjopen-2018-027931), 2019-08-01
Supplement: bmjopen-2018-027931.draft_revisions.pdf [file bmjopen-2018-027931.draft_revisions.pdf]

# BMJ Open

BMJ Open is committed to open peer review. As part of this commitment we make the peer review history of every article we publish publicly available.

When an article is published we post the peer reviewers' comments and the authors' responses online. We also post the versions of the paper that were used during peer review. These are the versions that the peer review comments apply to.

The versions of the paper that follow are the versions that were submitted during the peer review process. They are not the versions of record or the final published versions. They should not be cited or distributed as the published version of this manuscript.

BMJ Open is an open access journal and the full, final, typeset and author-corrected version of record of the manuscript is available on our site with no access controls, subscription charges or pay-per-view fees (<http://bmjopen.bmj.com>).

If you have any questions on BMJ Open's open peer review process please email [info.bmjopen@bmj.com](mailto:info.bmjopen@bmj.com)

# BMJ Open

## A CROSS SECTIONAL STUDY OF ASSOCIATION BETWEEN PSYCHOSOCIAL STRESSORS WITH CHRONIC KIDNEY DISEASE AMONG MIGRANT AND NON-MIGRANT GHANAIS: THE RODAM STUDY

|                               |                                                                                                                                                                                                                                                                                                                                                                                                                                                                                                                                                                                                                                                                                                                                                                                                                                                                                                                                                                                                                                                                                                                                                                                                                                                                                                                                                                                                                                                                                                                                                                |
|-------------------------------|----------------------------------------------------------------------------------------------------------------------------------------------------------------------------------------------------------------------------------------------------------------------------------------------------------------------------------------------------------------------------------------------------------------------------------------------------------------------------------------------------------------------------------------------------------------------------------------------------------------------------------------------------------------------------------------------------------------------------------------------------------------------------------------------------------------------------------------------------------------------------------------------------------------------------------------------------------------------------------------------------------------------------------------------------------------------------------------------------------------------------------------------------------------------------------------------------------------------------------------------------------------------------------------------------------------------------------------------------------------------------------------------------------------------------------------------------------------------------------------------------------------------------------------------------------------|
| Journal:                      | <i>BMJ Open</i>                                                                                                                                                                                                                                                                                                                                                                                                                                                                                                                                                                                                                                                                                                                                                                                                                                                                                                                                                                                                                                                                                                                                                                                                                                                                                                                                                                                                                                                                                                                                                |
| Manuscript ID                 | bmjopen-2018-027931                                                                                                                                                                                                                                                                                                                                                                                                                                                                                                                                                                                                                                                                                                                                                                                                                                                                                                                                                                                                                                                                                                                                                                                                                                                                                                                                                                                                                                                                                                                                            |
| Article Type:                 | Research                                                                                                                                                                                                                                                                                                                                                                                                                                                                                                                                                                                                                                                                                                                                                                                                                                                                                                                                                                                                                                                                                                                                                                                                                                                                                                                                                                                                                                                                                                                                                       |
| Date Submitted by the Author: | 17-Nov-2018                                                                                                                                                                                                                                                                                                                                                                                                                                                                                                                                                                                                                                                                                                                                                                                                                                                                                                                                                                                                                                                                                                                                                                                                                                                                                                                                                                                                                                                                                                                                                    |
| Complete List of Authors:     | <p>Adjei Nana, David ; University of Ghana, Department of Medical Laboratory Sciences; University of Amsterdam, Department of Public Health</p> <p>Stronks, Karien; Academic Medical Center , Department of Public Health Adu, Dwomoa; Korle-bu Teaching Hospital, Department of Medicine</p> <p>Beune, Erik; AMC</p> <p>Meeks, Karlijn; AMC, Public Health</p> <p>Smeeth, Liam; London School of Hygiene and Tropical Medicine, Addo, Juliet; London School of Hygiene and Tropical Medicine, Non Communicable Disease Epidemiology</p> <p>Owusu-Dabo, Ellis; Kwame Nkrumah University of Science and Technology, Kumasi Centre for Collaborative Research in Tropical Medicine</p> <p>Klipstein-Grobusch, Kerstin; 1 Julius Global Health, Julius Center for Health Sciences and Primary Care, University Medical Centre Utrecht, Utrecht, The Netherlands</p> <p>Mockenhaupt, Frank; Charité – University Medicine, Berlin, Institute of Tropical Medicine and International Health</p> <p>Schulze, Matthias; German Institute of Human Nutrition Potsdam-Rehbruecke</p> <p>Danquah, Ina; German Institute of Human Nutrition, Molecular Epidemiology; Charite Universitatsmedizin Berlin, Institute for Social Medicine, Epidemiology and Health Economy</p> <p>Spranger, Joachim; Department of Endocrinology and Metabolism, 1. Charité-University Medicine Berlin, Berlin, Germany.</p> <p>Bahendeka, Silver; St. Francis Hospital Nsambya,</p> <p>Agyemang, Charles; Academic Medical centre, University of Amsterdam, Department of Public Health</p> |
| Keywords:                     | Chronic Kidney Disease, Psychosocial stressors, migrants, rodam study, Europe, Ghana                                                                                                                                                                                                                                                                                                                                                                                                                                                                                                                                                                                                                                                                                                                                                                                                                                                                                                                                                                                                                                                                                                                                                                                                                                                                                                                                                                                                                                                                           |
|                               |                                                                                                                                                                                                                                                                                                                                                                                                                                                                                                                                                                                                                                                                                                                                                                                                                                                                                                                                                                                                                                                                                                                                                                                                                                                                                                                                                                                                                                                                                                                                                                |

1  
2  
3  
4  
5  
6  
7  
8  
9  
10  
11  
12  
13  
14  
15  
16  
17  
18  
19  
20  
21  
22  
23  
24  
25  
26  
27  
28  
29  
30  
31  
32  
33  
34  
35  
36  
37  
38  
39  
40  
41  
42  
43  
44  
45  
46  
47  
48  
49  
50  
51  
52  
53  
54  
55  
56  
57  
58  
59  
60

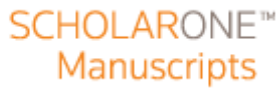

1  
2  
3  
4  
5  
6  
7  
8  
9  
10  
11  
12  
13  
14  
15  
16  
17  
18  
19  
20  
21  
22  
23  
24  
25  
26  
27  
28  
29  
30  
31  
32  
33  
34  
35  
36  
37  
38  
39  
40  
41  
42  
43  
44  
45  
46  
47  
48  
49  
50  
51  
52  
53  
54  
55  
56  
57  
58  
59  
60

## A CROSS SECTIONAL STUDY OF ASSOCIATION BETWEEN PSYCHOSOCIAL STRESSORS WITH CHRONIC KIDNEY DISEASE AMONG MIGRANT AND NON-MIGRANT GHANAIS: THE RODAM STUDY

David N. Adjei, MSc, PhD<sup>1,2</sup>; Karien Stronks, MSc, PhD<sup>1</sup>; Dwomoa Adu, MD<sup>3</sup>; Erik Beune, MSc, PhD <sup>1</sup>; Karlijn Meeks, MSc, PhD <sup>1</sup>; Liam Smeeth, MD, PhD<sup>4</sup> ; Juliet, Addo, MD, PhD <sup>4</sup>; Ellis Owuso-Dabo, MSc, PhD <sup>5</sup>, Kerstin Klipstein-Grobusch, MSc, PhD <sup>6,7</sup>; Frank P. Mockenhaupt, MD, PhD <sup>8</sup> ; Matthias B. Schulze, MSc, PhD <sup>9</sup>; Ina, Danquah, MSc, PhD <sup>9,10</sup> ; Joachim, Spranger, MD, PhD <sup>11,12,13</sup>; Silver Bahendeka, MD, PhD<sup>14</sup>; Charles Agyemang, MPH, PHD<sup>1</sup>

1. Department of Public Health, Academic Medical Center, University of Amsterdam, Amsterdam, Amsterdam Public Health Research Institute, Amsterdam, The Netherlands.
2. Department of Medical Laboratory Sciences, School of Biomedical and Allied Health Sciences, College of Health Sciences, University of Ghana, Accra, Ghana.
3. Department of Medicine, School of Medicine and Dentistry, University of Ghana and Korle-Bu Teaching Hospital, Accra, Ghana.
4. Department of Non-Communicable Disease Epidemiology, London School of Hygiene and Tropical Medicine, London, United Kingdom.
5. Kumasi Centre for collaborative Research, KNUST, Kumasi, Ghana.
6. Julius Global Health, Julius Center for Health Sciences and Primary Care, University Medical Centre, Utrecht University, The Netherlands
7. Division of Epidemiology & Biostatistics, School of Public Health, Faculty of Health Sciences, University of the Witwatersrand, Johannesburg, South Africa
8. Institute of Tropical Medicine and International Health, Charité -University Medicine Berlin, Augustenburger Platz 1, 13353 Berlin, Germany.

- 1
- 2
- 3
- 4 9. Department of Molecular Epidemiology, German Institute of Human Nutrition
- 5 Potsdam-Rehbrücke, Nuthetal, Germany.
- 6
- 7 10.Charité - Universitaetsmedizin Berlin, Institute for Social Medicine,
- 8 Epidemiology and Health Economics, Berlin, Germany.
- 9
- 10
- 11 11.Department of Endocrinology and Metabolism, Charité-University Medicine
- 12 Berlin, Berlin, Germany.
- 13
- 14
- 15 12.German Centre for Cardiovascular Research (DZHK), Berlin, Germany.
- 16
- 17 13.Center for Cardiovascular Research (CCR), Charité-University, Medicine,
- 18 Berlin, Germany.
- 19
- 20
- 21
- 22 14.MKPGMS - Uganda Martyrs University, Kampala, Uganda.
- 23
- 24
- 25
- 26
- 27

28 Address correspondence to David Nana Adjei, MSc, Department of Public  
29 Health, Academic Medical Centre, University of Amsterdam, Meibergdreef 9,  
30  
31 1105 AZ Amsterdam, the Netherlands, School Biomedical and Allied Health  
32  
33 Sciences, Medical Laboratory Sciences, University of Ghana, E-mail:  
34  
35  
36 [dna@chs.edu.gh](mailto:dna@chs.edu.gh), [d.n.adjei@amc.uva.nl](mailto:d.n.adjei@amc.uva.nl), Tel: +233236717850  
37  
38  
39  
40  
41  
42  
43  
44  
45  
46  
47  
48  
49  
50  
51  
52  
53  
54  
55  
56  
57  
58  
59  
60

For peer review only

1  
2  
3  
4  
5  
6  
7  
8  
9  
10  
11  
12  
13  
14  
15  
16  
17  
18  
19  
20  
21  
22  
23  
24  
25  
26  
27  
28  
29  
30  
31  
32  
33  
34  
35  
36  
37  
38  
39  
40  
41  
42  
43  
44  
45  
46  
47  
48  
49  
50  
51  
52  
53  
54 **Abstract**  
55  
56  
57  
58  
59  
60

1  
2  
3  
4  
5 **Objectives:** The association between Psychosocial stressors (PS) and CKD  
6 within sub-Saharan African (SSA) populations is unknown. We examined the  
7 association between PS and CKD prevalence among rural and urban  
8 Ghanaians and their migrants living in three European cities. We also assessed  
9 if the influence of PS on CKD is partially mediated by primary risk factors  
10 (hypertension and diabetes) of CKD.  
11  
12  
13  
14  
15

16  
17 **Methods:** A multi-centred cross sectional baseline data from the Research on  
18 Obesity and Diabetes among African Migrants (RODAM) study. A random  
19 sample of 5,659 adults (Europe, 3167, rural, 1,043, Urban Ghana, 1,449,  
20 Ghana) aged 25 to 70 years. PS defined by negative life events, perceived  
21 discrimination, perceived stress at work/home and depressive symptoms. Three  
22 CKD outcomes were considered using the 2012 KDIGO (Kidney Disease:  
23 Improving Global Outcomes) severity of CKD classification. Comparisons  
24 between PS and CKD were made using logistic regression analyses across all  
25 sites.  
26  
27  
28  
29  
30  
31  
32

33  
34 **Results:** We observed higher proportion of Ghanaians living in SSA with  
35 negative life events (68.7%) and perceived permanent stress (15.9%).  
36 Depressive symptoms (7.5%) and perceived discrimination (29.7%) were more  
37 common among Ghanaians living in Europe. No association was observed  
38 between either one of the four constructs of PS and CKD across all the sites  
39 except for those with some level of stress at work/home in Berlin that had a  
40 higher risk of CKD (2.78, 95% C.I. 1.43-5.43).  
41  
42  
43  
44  
45  
46

47 **Conclusion:** Our study shows no convincing evidence for associations between  
48 stress as indicated by four PS constructs and prevalence of CKD. Further  
49 studies aimed at identifying potential factors driving the high prevalence of CKD  
50 among these populations are needed.  
51  
52  
53  
54  
55  
56  
57  
58  
59  
60

1  
2  
3 **Index Words:** Chronic kidney disease; psychosocial stressors; risk factor;  
4 migrants; RODAM study, Europe, Ghana  
5  
6  
7  
8  
9  
10  
11  
12  
13  
14  
15  
16  
17  
18  
19  
20  
21  
22  
23  
24  
25  
26  
27  
28  
29  
30  
31  
32  
33  
34  
35

### 36 **Strengths and limitations of the study**

- 39 • This study used all three categories of CKD definitions (albuminuria,  
40 reduced eGFR and CKD risk) by KDIGO 2012 in assessing association  
41 of SS with CKD across all sites. This provided more detailed information  
42 on CKD outcomes.  
43  
44
- 45 • All sites in our study used well standardized study protocols and this  
46 eliminated intra protocol variability.  
47  
48  
49  
50  
51  
52  
53  
54  
55  
56  
57  
58  
59  
60



- 1  
2  
3  
4  
5  
6  
7  
8  
9  
10  
11  
12  
13  
14  
15  
16  
17  
18  
19  
20  
21  
22  
23  
24  
25  
26  
27  
28  
29  
30  
31  
32  
33  
34  
35  
36  
37  
38  
39  
40  
41  
42  
43  
44  
45  
46  
47  
48  
49  
50  
51  
52  
53  
54  
55  
56  
57  
58  
59  
60
- The use of four constructs of psychosocial stressors (negative life events, perceived discrimination, perceived stress at work/home and depressive symptoms) provided a robust approach to assessing SS associations with CKD.
  - The limitation of intra laboratory variability in earlier studies was eliminated using the same standard operating procedures in the same laboratory for running all samples for all sites.
  - PS is captured and experienced in different magnitude across different populations. We were unable to ascertain if PS as defined in this study was adequately captured among Ghanaians living in rural and urban Ghana.

## Introduction

Worldwide, Chronic Kidney Disease (CKD) is a leading cause of mortality and morbidity with several risk factors (diabetes mellitus, obesity, hypertension and cardiovascular disease) (1). The epidemiologic transition in low-and-middle income countries (LMICs) shows increased burden of these risk factors (2-4). CKD's high morbidity and mortality is mostly driven by uncontrolled comorbidities such as diabetes and hypertension (5, 6). CKD treatment and management cost is very high and not sustainable even in high-income countries and this underscores the need for prevention (7). Available literature has shown that both individual and community level economic factors influence CKD (8-10). However, after adjusting for both individual and community level socioeconomic position, differences in CKD risk among different populations remained (8, 10, 11). These findings seem to suggest other social environmental factors may be driving CKD prevalence and progression in high-risk populations. Recent studies have shown that whereas Ghanaians living in Europe have a higher CKD risk compared to their host nation populations, they have a lower CKD risk compared with their peers living in urban Ghana (12). The increased risk of CKD observed in urban Ghana was not fully explained by conventional risk factors (12) and socio-economic status (13). This underscores the need to identify other modifiable risk factors of CKD for prevention, optimum treatment and efficient management.

1  
2  
3 Evidence shows that where an individual works or stays influences his or her  
4 physiological wellbeing leading to an increased risk of chronic diseases (14, 15). Thus,  
5 migrants' physiological wellbeing are influenced by the environment (host nations) they  
6 move to stay. The association between PS and CKD as well as the biological  
7 pathways through which PS influences CKD progression is poorly understood and  
8 complex (5). Despite this, PS have been reported to be associated with alteration in  
9 the sympathetic/autonomic nervous system activity leading to higher rates of traditional  
10 risk factors of CKD including hypertension and diabetes (16, 17). A link between  
11 stress, hypertension, diabetes and CKD through innervation of all segments of the  
12 kidney by renal sympathetic nerves has been suggested (18). Also, environmental  
13 stressors have been reported to contribute to the development of insulin resistance,  
14 metabolic syndrome, obesity and diabetes which if uncontrolled leads to CKD incidence  
15 (19, 20). Thus, the above-mentioned risk factors of CKD may explain the link between  
16 PS and CKD.  
17  
18  
19  
20  
21  
22  
23  
24  
25  
26  
27  
28  
29  
30  
31  
32  
33  
34

35 However, studies linking psychosocial stressors (PS) to CKD prevalence and  
36 progression vary greatly among different geographical populations. (5, 21-26).  
37 Specifically, in the USA whereas no association was found between PS and CKD (26-  
38 28) another study reported lower prevalence of CKD was associated with greater life  
39 stressors at baseline (26). In contrast, in the Netherlands depressive and anxiety  
40 symptoms were observed to be common among CKD patients and such patients had  
41 increased risk of poor clinical outcomes (22). Similarly, a study conducted in Korea  
42 reported a positive relationship between depressive symptoms and CKD (21). These  
43 observations suggest differential impact of PS at different geographical locations. For  
44  
45  
46  
47  
48  
49  
50  
51  
52  
53  
54  
55  
56  
57  
58  
59  
60

1  
2  
3 example, discrimination among migrants may differ greatly between host population and  
4 from their SSA compatriots. Specifically, some studies have reported differences in PS  
5 among rural and urban populations (29).  
6  
7  
8  
9

10 Current literature on the association between PS and CKD among sub-Saharan African  
11 populations and their migrants in Europe is scanty and uncertain. We therefore sought  
12 to determine the association between PS and CKD prevalence among Ghanaians in  
13 rural and urban Ghana and their migrants living in three European cities. Furthermore,  
14 we examined the influence of psychosocial stressors on risk factors (obesity, diabetes  
15 and hypertension) of CKD.  
16  
17  
18  
19  
20  
21  
22  
23  
24  
25

## 26 **Methods**

### 27 *Study population and study design*

28  
29  
30 For this study, data from the Research on Obesity & Diabetes among African Migrants  
31 (RODAM) study, a multi-centre cross sectional study, were used. The rationale,  
32 conceptual framework, design and methodology of the RODAM study have been  
33 described in detail elsewhere (12, 13, 30, 31). To summarize, the study was  
34 conducted from 2012 to 2015. Ghanaians aged 25-70 years living in rural and urban  
35 communities in Ghana as well as in three European cities (Amsterdam, Berlin and  
36 London) were included in this study. We standardized data collection across all sites.  
37  
38 The ethics committees in Ghana, the Netherlands, Germany and the UK approved the  
39 study protocol prior to data collection. Informed consent was obtained from each  
40 participant prior to enrollment in the study. In Ghana, participants were randomly drawn  
41  
42  
43  
44  
45  
46  
47  
48  
49  
50  
51  
52  
53  
54  
55  
56  
57  
58  
59  
60

1  
2  
3 from a list of 30 enumeration areas in the Ashanti region based on the 2010  
4 population census. These enumeration areas came from both rural areas and two  
5 purposively selected urban cities (Kumasi and Obuasi). For Ghanaians in Amsterdam,  
6 we randomly drew participants from the Municipal register. This register holds data on  
7 country of birth of citizens and their parents, thus allowing for sampling based on the  
8 Dutch standard indicator for ethnic origin. London lacked a population register for  
9 migrant groups. Thus, Ghanaian organizations served as sampling frame for the study.  
10 Lists of these organizations were obtained from the Ghanaian Embassy and the  
11 Association of Ghanaian Churches in the UK in the boroughs known to have the  
12 greatest concentration of Ghanaians. Members were selected from the lists of all  
13 members of these organizations. In Berlin, the registration office of the federal state of  
14 Berlin provided a list of Ghanaian individuals in Berlin but this resulted in low  
15 response rate. Because of this, a change was made to use lists of Ghanaian churches  
16 and organizations as the sampling frame. Across all sites in Europe, all selected  
17 participants were sent a written invitation combined with written information (information  
18 sheet) regarding the study and a response card. The participants were contacted by  
19 phone to schedule a date and location of the interview with a trained research  
20 assistant or opt for the self-administration of the paper questionnaire or digital online  
21 version depending on the preference of the participant. After the completion of the  
22 questionnaire, a date for physical examination was then scheduled after a positive  
23 response. The participants were instructed to fast from 10.00 p.m. the night before the  
24 physical examination. The response rate was 76% in rural Ghana and 74% in urban  
25 Ghana. In London, of those individuals who were registered in the various Ghanaian  
26  
27  
28  
29  
30  
31  
32  
33  
34  
35  
36  
37  
38  
39  
40  
41  
42  
43  
44  
45  
46  
47  
48  
49  
50  
51  
52  
53  
54  
55  
56  
57  
58  
59  
60

1  
2  
3 organizations and were invited, 75% agreed and participated in the study, while in  
4  
5 Berlin, this figure was 68%, and 53% in Amsterdam. For the current study,  
6  
7 5898 participants with data available on both questionnaire data and physical  
8  
9 measurements were used. Individuals who were outside the age range of 25-70 years  
10  
11 (n=239) were excluded because not all the study sites had individuals outside this age  
12  
13 range resulting in 5659 individuals comprising of 2492 from rural and urban Ghana  
14  
15 and 3167 from the three European cities. In the conduct of analysis, we further  
16  
17 excluded individuals with no data on CKD and all other indicators (n=52), resulting in  
18  
19 a data set of 5607 participants for analysis.  
20  
21  
22  
23  
24  
25

## 26 **Measurements**

### 27 28 29 **Covariates**

#### 30 31 *Demographic and lifestyle factors*

32  
33  
34  
35  
36 For this study, we obtained information on demographics, educational level and lifestyle  
37  
38 factors (smoking and physical activity) by questionnaire. Physical examinations were  
39  
40 performed across all sites using validated devices per standardized operational  
41  
42 procedures. Weight was measured in light clothing and without shoes with SECA 877  
43  
44 scales to the nearest 0.1 kg. Height was measured without shoes with a portable  
45  
46 stadiometer (SECA 217) to the nearest 0.1 cm. Body mass index (BMI) was calculated  
47  
48 as weight (kg) divided by height squared (m<sup>2</sup>). Overweight was defined as BMI of 25  
49  
50 to < 30 kg/m<sup>2</sup> and obesity as BMI ≥30 kg/m<sup>2</sup>. Waist circumference was measured in  
51  
52 centimetres at the midpoint between the lower rib and the upper margin of the iliac  
53  
54  
55  
56  
57  
58  
59  
60

1  
2  
3 crest. We used the same assessor for each participant in measuring all  
4 anthropometrics and each was measured twice; the average of the two measurements  
5 was used for analyses.  
6  
7  
8  
9

### 10 *Predictor: SS*

11  
12 For this study, four constructs of psychosocial stress (discrimination, perceived stress  
13 at work or at home, negative life events and depressive symptoms) were used as  
14 explanatory variables.  
15  
16  
17  
18  
19  
20  
21

### 22 *Perceived discrimination*

23  
24 Everyday discrimination as perceived by participants was reported as routinely  
25 experiencing instances of unfair treatment. We used the the Everyday Discrimination  
26 Scale (EDS). The EDS comprises of a 9-items which rates the frequency at which  
27 participants experience daily mistreatment and it focuses on being treated with less  
28 courtesy or less respect, receiving poorer service than other people or being called  
29 names or insulted. Participants had the option of rating each of the 9-items from  
30 “never” = 1 to “very often” = 5. The obtained scores were summed and an average of  
31 the scores was computed to obtain a final score of 1 to 5. This scale was used  
32 because it is commonly used for self-reported discrimination (32), with consistent high  
33 reliability among a variety of ethnicities (33), comprising African migrants in the  
34 Netherland (34).  
35  
36  
37  
38  
39  
40  
41  
42  
43  
44  
45  
46  
47  
48  
49

### 50 *Perceived stress at work or at home*

51  
52 We defined perceived stress at work or at home as “sense of irritation, filled with  
53 anxiety, or as having difficulties in sleeping because of circumstances at work or at  
54  
55  
56  
57  
58  
59  
60

1  
2  
3 home". We used the psychological stress scale created by the INTERHEART study  
4 (35). Participants in the study were asked about their opinion on frequency of stress at  
5  
6 (35). Participants in the study were asked about their opinion on frequency of stress at  
7  
8 work and at home, and could answer "never", "some periods", "several periods", or  
9  
10 "continually". Both answers were then combined into a composite score and graded  
11  
12 into four categories: never experienced to experienced permanent stress at home or at  
13  
14 work (35). Due to the very small numbers in the permanent periods of stress group,  
15  
16 we combined experienced several periods of stress at home or at work and permanent  
17  
18 periods of stress at home or at work.  
19  
20  
21  
22  
23

### 24 ***Negative life events***

25  
26 The presence of major negative life events among participants was perceived as any  
27  
28 event that could cause acute stress to an individual. We therefore applied the well-  
29  
30 validated and widely used List of Threatening Experiences (LTE) (36, 37). The scale  
31  
32 comprised of 12 unpleasant events participants perceived to have experienced in the  
33  
34 past 12 months. We used a slightly-altered version of LTE consisting of 9 unpleasant  
35  
36 items. We dichotomized participants into two groups namely "no negative life events"  
37  
38 and "one or more events" and participants in the second category were expected to  
39  
40 have higher levels of stress (37).  
41  
42  
43  
44  
45

### 46 ***Depressive symptoms***

47  
48 Depressive symptoms were measured by the 9-item Patient Health Questionnaire  
49  
50 (PHQ-9). The PHQ-9 consists of nine items, with a response scales 0 'not at all', 1  
51  
52 'on several days', 2 'on more than half of the days' and 3 'nearly every day'. A  
53  
54 participant was considered to be in a significant depressed mood (SDM) when one or  
55  
56  
57  
58  
59  
60



1  
2  
3 both of the items 1 (little interest or pleasure in doing things) and 2 (feeling down,  
4 depressed, or hopeless) were answered with at least 'on more than half of the days',  
5  
6 and at least 5 of the 9 items were answered with at least 'on more than half of the  
7  
8 days'(38).  
9  
10  
11  
12

### 13 *Co-morbidity factors*

14  
15  
16 Blood pressure (BP) was measured three times using a validated semi-automated  
17 device (The Microlife WatchBP home) with appropriate cuffs in a sitting position after  
18 at least 5min rest. The mean of the last two BP measurements was used in the  
19 analyses. Hypertension was defined as systolic BP 140mmHg and/or diastolic BP  
20 90mmHg, and/or being on antihypertensive medication treatment, and/or self-reported  
21 hypertension. Trained research assistants in all sites collected fasting venous blood  
22 samples according to standard operation procedures, and then temporarily stored at  
23 the local research location. The stored blood samples from the local research centres  
24 were transported to Berlin, Germany, according to standardized procedures, for  
25 biochemical analyses. This was done to avoid intra-laboratory variability. Fasting  
26 plasma glucose concentration was measured using an enzymatic method (hexokinase).  
27  
28 We defined Type 2 diabetes according to the World Health Organization diagnostic  
29 criteria (fasting glucose 7.0mmol/L, and/or current use of medication prescribed to treat  
30 diabetes, and/or self-reported diabetes) (39). We assessed concentration of total  
31 cholesterol using colorimetric test kits. All biochemical analyses were performed using  
32 an ABX Pentra 400 Chemistry Analyzer (ABX Pentra; Horiba 90 ABX, Germany).  
33  
34 Hypercholesterolaemia was defined as total cholesterol level  $\geq 6.22$ mmol/L. Serum  
35 creatinine concentration (in mol/L) was determined by a kinetic colorimetric  
36  
37  
38  
39  
40  
41  
42  
43  
44  
45  
46  
47  
48  
49  
50  
51  
52  
53  
54  
55  
56  
57  
58  
59  
60

1  
2  
3 spectrophotometric isotope dilution mass spectrometry calibration method (Roche  
4  
5  
6 Diagnostics).

7  
8  
9  
10 **Outcome: CKD prevalence**

11  
12 We asked participants to bring an early morning urine sample for the analyses of  
13  
14 albuminuria and creatinine levels. Urinary albumin concentration (in  $\mu\text{mol/L}$ ) was  
15  
16 measured by an immunochemical turbidimetric method (Roche Diagnostics). Urinary  
17  
18 creatinine concentration (in  $\text{mol/L}$ ) was measured by a kinetic spectrophotometric  
19  
20 method (Roche Diagnostics). Extensive quality checks were done inclusive of blinded  
21  
22 serial measurements. Estimated glomerular filtration rate (eGFR) was calculated using  
23  
24 the CKDEPI (CKD Epidemiology Collaboration) creatinine equation (40). Urinary  
25  
26 albumin-creatinine ratio (ACR; expressed in  $\text{mg/mmol}$ ) was calculated by taking the  
27  
28 ratio between urinary albumin and urinary creatinine. eGFR and albuminuria were  
29  
30 categorized according to the 2012 KDIGO classification (41). eGFR was categorized as  
31  
32 follows: G1,  $90\text{mL/min/1.73m}^2$  (normal kidney function); G2,  $60\text{-}89\text{mL/min/1.73m}^2$  (mildly  
33  
34 decreased); G3a,  $45\text{-}59\text{mL/min/1.73m}^2$  (mildly to moderately decreased); G3b,  $30\text{-}$   
35  
36  $44\text{mL/min/1.73m}^2$  (moderately to severely decreased); G4,  $15\text{-}29\text{ mL/min/1.73 m}^2$   
37  
38 (severely decreased); and G5,  $<15\text{mL/min/1.73m}^2$  (kidney failure). Albuminuria  
39  
40 categories were derived from ACR and were as follows: A1,  $< 3\text{mg/mmol}$  (normal to  
41  
42 mildly increased); A2,  $3\text{-}30\text{mg/mmol}$  (moderately increased); and A3,  $> 30\text{mg/mmol}$   
43  
44 (severely increased). CKD status was categorized according to severity of kidney  
45  
46 disease (green, low risk; yellow, moderately increased risk; orange, high risk; and red,  
47  
48 very high risk) using the combination of eGFR (G1-G5) and albuminuria (A1-A3) levels  
49  
50  
51  
52  
53  
54  
55  
56  
57  
58  
59  
60

1  
2  
3 defined by the 2012 KDIGO guideline (42). Due to the small number of participants in  
4 the very high-risk category of CKD (n=27), the high and very high-risk groups were  
5 combined. Because of the small number of participants in the severely increased  
6 albuminuria category (A3, n=62), we defined albuminuria as ACR 3mg/ mmol by  
7 combining the moderately increased (A2) and severely increased (A3) categories.  
8  
9  
10  
11  
12  
13

14  
15  
16  
17 Covariates assessed were age, sex, educational level and length of stay in Europe,  
18 hypertension and diabetes. Length of stay was assessed for Ghanaian migrants only.  
19 Length of stay was defined as the number of years lived in Europe at the time of  
20 data collection. Length of stay was controlled for due to evidence suggesting that it  
21 influences mental health (43). Other covariates were hypertension, obesity and  
22 diabetes.  
23  
24  
25  
26  
27  
28  
29  
30  
31  
32

### 33 ***Patient and Public Involvement***

34  
35 Community leaders were involved in the recruitment of patients. These comprised of religious  
36 communities (churches and mosques), endorsement from local key leaders and establishing relationships  
37 with healthcare organizations. We also provided information on the study by involving the local media  
38 (radio and television stations). We sent letters to all selected health and community authorities to notify  
39 participants of the study. Team members were sent to the various communities to stay among the  
40 community and organize mini clinics for a period of 1-2 weeks. Results of the study were disseminated  
41 through seminars, durbars and via radio and television stations.  
42  
43  
44  
45  
46

### 47 ***Statistical methods***

48  
49 Characteristics of participants were expressed as absolute numbers and percentages  
50 for categorical variables and means and standard deviations for continuous variables.  
51  
52  
53  
54 Odds ratios (ORs) and their corresponding 95% confidence intervals (CIs) and adjusted  
55  
56  
57  
58  
59  
60

1  
2  
3  
4  
5  
6  
7  
8  
9  
10  
11  
12  
13  
14  
15  
16  
17  
18  
19  
20  
21  
22  
23  
24  
25  
26  
27  
28  
29  
30  
31  
32  
33  
34  
35  
36  
37  
38  
39  
40  
41  
42  
43  
44  
45  
46  
47  
48  
49  
50  
51  
52  
53  
54  
55  
56  
57  
58  
59  
60

CIs were estimated by means of binary logistic regression analyses to study odds of albuminuria (ACR>3 mg/mmol, A2-A3, moderately to severely increased albuminuria), reduced kidney function (eGFR< 60 mL/min/1.73m<sup>2</sup>, G3-G5 moderately to severely decreased kidney function) and increased CKD risk (high and very high CKD risk), with adjustments for covariates (44). The Spearman's correlation test was used to test for associations between all four constructs of PS. Two models were used to examine the data. Model 1 was adjusted for age and sex, model 2 was adjusted for age and sex and educational level for Ghanaians living in SSA while age, sex, educational level and length of stay for Ghanaians living in Europe (45-47). Model 3 was adjusted for sex, age, educational level and conventional risk factors (hypertension, diabetes, hypercholesterolemia, BMI, physical activity and smoking status) of CKD. The analyses were performed for all 4 constructs of PS using individuals who have not experienced either of the PS per outcome as reference. All tests were stratified per sites, Ghanaians living in SSA and Europe; Ghanaians living in rural and urban Ghana and Ghanaians living in Amsterdam, Berlin and London due to an observed interaction between PS and site. Furthermore, the analysis were stratified for those with and without obesity, diabetes, hypertension across all sites. All analyses were performed using STATA, version 14.0 (StataCorp LP).

## **Results**

### ***Characteristics of the study population***

Participants characteristics are shown in Table 1. Ghanaians living in Ghana were older than their peers living in Europe. There were more females compared with males

1  
2  
3 in both Ghana and Europe. Ghanaians living in Ghana were significantly less educated  
4  
5 than those living in Europe. Higher proportion of Ghanaians living in Ghana had  
6  
7 experienced negative life events in the last 12 months compared with their peers living  
8  
9 in Europe. More than half of Ghanaians living in Ghana had experienced some stress  
10  
11 at home or work whereas only a third of those living in Europe had experienced some  
12  
13 stress at home or work. Permanent stress at home/work was fairly the same among  
14  
15 Ghanaians living in SSA and Europe. Perceived discrimination was significantly higher  
16  
17 among Ghanaians living in Europe compared with their peers living in Ghana.  
18  
19 Depressive symptoms were more prevalent among Ghanaians living in Europe  
20  
21 compared with their peers living in Ghana. Almost all Ghanaians living in Europe were  
22  
23 first generation migrants. Ghanaians in Europe were more obese, more likely to smoke  
24  
25 and less physically active compared with their peers living in Ghana. Prevalence of  
26  
27 hypercholesterolemia was higher, but type 2 diabetes and hypertension were lower  
28  
29 among Ghanaians living in Ghana compared with their peers living in Europe.  
30  
31 Prevalence of albuminuria, reduced eGRF and CKD risk were higher in Ghanaians  
32  
33 living in Ghana compared with those living in Europe.  
34  
35  
36  
37  
38  
39  
40  
41  
42  
43  
44  
45  
46

47 **Table 1: Baseline characteristics of respondents**  
48

|          | Ghanaians<br>(SSA)<br>n (%) | Ghanaians<br>(Europe)<br>n (%) | p-value |
|----------|-----------------------------|--------------------------------|---------|
| <b>N</b> | 2,492 (44.1)                | 3,167 (55.9)                   |         |

|                                                   |                |              |                |
|---------------------------------------------------|----------------|--------------|----------------|
|                                                   |                |              | 0.001*         |
| <b>Female sex</b>                                 | 1672 (67.1)    | 1,851 (58.5) | 0.001*         |
| <b>Age (years)</b>                                | 45.7±11.9      | 46.6±9.9     | 0.006*         |
| <b>Educational status</b>                         |                |              |                |
| Low                                               | 1169 (49.2)    | 635 (21.8)   | 0.001*         |
| Middle                                            | 858 (36.1)     | 1111 (38.1)  | 0.122          |
| High                                              | 347 (14.6)     | 1168 (40.1)  | 0.001*         |
| <b>Negative life events in the past 12 months</b> |                |              |                |
| No                                                | 739 (31.3)     | 1158 (41.0)  | 0.001*         |
| Yes                                               | 1619 (68.7)    | 1667 (59.0)  | 0.001*         |
| <b>Perceived stress at home/work</b>              |                |              |                |
| Never                                             | 692 (29.4)     | 1371 (48.8)  | 0.001*         |
| Some periods                                      | 1290 (54.7)    | 1033 (36.8)  | 0.001*         |
| Several/Permanent                                 | 375 (15.9)     | 407 (14.4)   | 0.117          |
| <b>Perceived discrimination</b>                   |                |              |                |
| No                                                | 2065 (95.2)    | 1960 (70.3)  | 0.001*         |
| Yes                                               | 104 (4.8)      | 829 (29.7)   | 0.001*         |
| <b>Depressive symptoms</b>                        |                |              |                |
| No                                                | 2239 (94.9)    | 2582 (92.5)  | 0.001*         |
| Yes                                               | 119 (5.1)      | 209 (7.5)    | 0.001*         |
| <b>Migration generation</b>                       |                |              |                |
| First                                             | Not applicable | 2868 (98.7)  | Not applicable |
| Second                                            | Not applicable | 38 (1.3)     | Not applicable |

|                                        |             |              |        |
|----------------------------------------|-------------|--------------|--------|
| <b>BMI</b>                             |             |              |        |
| Normal (<25kg/m <sup>2</sup> )         | 1373 (55.2) | 643 (20.4)   | 0.001* |
| Overweight (25 ≤ 30kg/m <sup>2</sup> ) | 684 (27.5)  | 1,350 (42.8) | 0.001* |
| Obese (>30kg/m <sup>2</sup> )          | 432 (17.3)  | 1163 (36.8)  | 0.001* |
| Currently smoking                      | 36 (1.5)    | 121 (4.1)    | 0.001* |
| <b>Physical activity</b>               | 1255 (52.8) | 1131 (44.0)  | 0.001* |
| <b>Hypocholesteraemia</b>              | 352 (14.2)  | 354 (11.3)   | 0.007* |
| <b>Type 2 diabetes</b>                 | 206 (8.3)   | 444 (14.0)   | 0.001* |
| <b>Hypertension</b>                    | 837 (33.6)  | 1801 (56.9)  | 0.001* |
| <b>ACR</b>                             |             |              |        |
| A1 < 3mg/mmol                          | 2215 (90.2) | 2814 (91.8)  | 0.001* |
| A2-A ≥ 3mg/mmol                        | 243 (9.8)   | 252 (8.2)    | 0.285  |
| <b>eGFR</b>                            |             |              |        |
| G1-G2 ≥ 60 mL/min/1.73 m <sup>2</sup>  | 2377 (96.3) | 2936 (97.4)  | 0.018* |
| G3a-G5 < 60 mL/min/1.73 m <sup>2</sup> | 85 (3.7)    | 78 (2.6)     | 0.018* |
| <b>CKD Risk</b>                        |             |              |        |
| Low risk                               | 2197 (89.6) | 2705 (91.5)  | 0.015* |
| Moderate-very high risk                | 256 (10.4)  | 252 (8.5)    | 0.015* |

**Abbreviations:** N, number of respondents; BMI, body mass index; eGFR, estimated glomerular filtration rate; G1-G2, normal to high kidney function to mildly decreased; G3a-G5, mildly to moderately decreased to Kidney failure; ACR, albumin creatinine ratio; A1, normal to mildly increased; A2-A3, moderately increased to severely increased; CKD, Chronic kidney disease; SSA, Sub-Saharan Africa; CI, confidence intervals.

### ***Association between PS and CKD***

Figure 1-4 shows CKD prevalence by negative life events in the past 12 months among Ghanaians living in Ghana and Europe. In Europe, CKD prevalence was fairly the same among those who had experienced any negative life events compared with those who had not in the last 12 months. Prevalence of CKD was higher among Ghanaians who had not experienced any negative life events in the past 12 months compared with those who had experienced some negative life events and living in Ghana. CKD prevalence was higher among Ghanaians who had not experienced any form of discrimination than those who had not in Ghana as well as in Europe (Figure 2). CKD prevalence was higher among Ghanaians who had experienced several/permanent stress at work/home in the past 12 months and living in Ghana or Europe (Figure 3). Ghanaians who did not report any form of depressive symptoms



1  
2  
3  
4  
5  
6  
7  
8  
9  
10  
11  
12  
13  
14  
15  
16  
17  
18  
19  
20  
21  
22  
23  
24  
25  
26  
27  
28  
29  
30  
31  
32  
33  
34  
35  
36  
37  
38  
39  
40  
41  
42  
43  
44  
45  
46  
47  
48  
49  
50  
51  
52  
53  
54  
55  
56  
57  
58  
59  
60

had a higher CKD prevalence than those who did and living in Ghana and Europe (Figure 4).

For peer review only

Table 2 shows the correlation matrix between the 4 constructs of PS among Ghanaians living in Ghana and those living in Europe. All four constructs of PS were positively correlated with each other among Ghanaians living in Europe and Ghanaians living in Ghana, except stress at work/home and discrimination among Ghanaians living in Ghana.

**Table 2: Relationship between PS constructs (negative life events, discrimination, stress at work or home and depression) by Ghanaians (SSA) and Ghanaians (Europe)**

| Correlation matrix  | Negative events | Discrimination | Stress at work/home | Depression |
|---------------------|-----------------|----------------|---------------------|------------|
| <b>Europe</b>       |                 |                |                     |            |
| Negative events     | 1.000           |                |                     |            |
| Discrimination      | 0.152**         | 1.000          |                     |            |
| Stress at work/home | 0.297**         | 0.161**        | 1.000               |            |
| Depressive symptoms | 0.143**         | 0.1366**       | 0.285**             | 1.000      |
| <b>Ghana</b>        |                 |                |                     |            |
| Negative events     | 1.000           |                |                     |            |
| Discrimination      | 0.079**         | 1.000          |                     |            |

|    |            |         |        |         |
|----|------------|---------|--------|---------|
| 1  |            |         |        |         |
| 2  |            |         |        |         |
| 3  |            |         |        |         |
| 4  | Stress at  |         |        |         |
| 5  |            |         |        |         |
| 6  | work/home  | 0.101** | -0.032 | 1.000   |
| 7  |            |         |        |         |
| 8  | Depressive |         |        | 1.000   |
| 9  |            |         |        |         |
| 10 | symptoms   | 0.091** | 0.042  | 0.185** |
| 11 |            |         |        |         |
| 12 |            |         |        |         |

---

**\*\*Significant at 1%, Spearman's correlation**

For peer review only

Table 3 shows association between all 4 constructs of PS and CKD among Ghanaians living in Ghana and those living in Europe. There was no statistically significant association between PS and albuminuria, reduced eGFR and CKD risk among Ghanaians living in Ghana and those living in Europe except individuals living in Europe with some stress and lower risk of reduced eGFR. Table S1 shows further

1  
2  
3 adjustments for conventional risk factors of CKD. This did show any  
4  
5 associations between PS and albuminuria, reduced eGFR and CKD risk among  
6  
7  
8  
9  
10  
11  
12  
13  
14  
15  
16  
17  
18  
19  
20  
21  
22  
23  
24  
25  
26  
27  
28  
29  
30  
31  
32  
33  
34  
35  
36  
37  
38  
39  
40  
41  
42  
43  
44  
45  
46  
47  
48  
49  
50  
51  
52  
53  
54  
55  
56  
57  
58  
59  
60

adjustments for conventional risk factors of CKD. This did show any associations between PS and albuminuria, reduced eGFR and CKD risk among Ghanaians living in Ghana and Europe (S1). Table S2 shows further stratification based on obesity status. We did not find any association between PS and CKD for obese participants and those who were not obese for Ghanaians living in rural and urban Ghana and those living in Europe. However, we observed an inverse association between PS and CKD among migrants who were not obese but have experienced discrimination for the past 12 months (S2). In Table S3 we stratified our analysis based on diabetic status. We did not find any associations between PS and CKD for participants with and without diabetes for both Ghanaians living in rural and urban Ghana and their migrant peers in Europe (S3). Finally, Table S4 stratified analysis by hypertension status. No associations were observed between PS and CKD for individuals who had hypertension and those who did not have hypertension for both those living in rural and urban Ghana as well as their compatriots living in Europe. An inverse association was observed between PS and CKD among Ghanaians who have experienced discrimination in the last 12 months with no hypertension and living in Europe. Also, we observed that having experienced some stress at home/work was inversely associated with reduced eGFR among Ghanaians with hypertension and living in Europe (S4).

1  
2  
3  
4  
5  
6  
7  
8  
9  
10  
11  
12  
13  
14  
15  
16  
17  
18  
19  
20  
21  
22  
23  
24  
25  
26  
27  
28  
29  
30  
31  
32  
33  
34  
35  
36  
37  
38  
39  
40  
41  
42  
43  
44  
45  
46  
47  
48  
49  
50  
51  
52  
53  
54  
55  
56  
57  
58  
59  
60

For peer review only

**Table 3: Association of psychosocial stressors (PS) indicators (negative life events, discrimination, stress at work/home and depression) with albuminuria, reduced eGFR and CKD risk for Ghanaians living in Ghana and those living in Europe**

|                        | Albuminuria (ACR $\geq$ 3 mg/mmol) |                  |                  | eGFR < 60 mL/min/1.73 m <sup>2</sup> |                  |                  | High to very high CKD risk (KDIGO, 2012) |                  |                  |
|------------------------|------------------------------------|------------------|------------------|--------------------------------------|------------------|------------------|------------------------------------------|------------------|------------------|
|                        | n (%)                              | OR (95% CI)      |                  | n (%)                                | OR (95% CI)      |                  | n cases (%)                              | OR (95% CI)      |                  |
|                        |                                    | Model 1          | Model 2          |                                      | Model 1          | Model 2          |                                          | Model 1          | Model 2          |
| <b>Negative events</b> |                                    |                  |                  |                                      |                  |                  |                                          |                  |                  |
| <b>Europe</b>          |                                    |                  |                  |                                      |                  |                  |                                          |                  |                  |
| No                     | 1128 (8.2)                         | 1.00 (Reference) | 1.00 (Reference) | 1106 (2.6)                           | 1.00 (Reference) | 1.00 (Reference) | 1090 (8.5)                               | 1.00 (Reference) | 1.00 (Reference) |
| Yes                    | 1615 (8.4)                         | 1.03 (0.78-1.35) | 1.07 (0.80-1.42) | 1587 (2.5)                           | 0.86 (0.53-1.42) | 0.83 (0.49-1.39) | 1557 (8.6)                               | 0.97 (0.76-1.32) | 0.99 (0.74-1.32) |
| <b>Ghana</b>           |                                    |                  |                  |                                      |                  |                  |                                          |                  |                  |
| No                     | 732 (8.7)                          | 1.00 (Reference) | 1.00 (Reference) | 736 (4.5)                            | 1.00 (Reference) | 1.00 (Reference) | 732 (10.9)                               | 1.00 (Reference) | 1.00 (Reference) |
| Yes                    | 1595 (3.8)                         | 0.87 (0.65-1.16) | 0.85 (0.63-1.14) | 1601 (3.4)                           | 0.69 (0.45-1.08) | 0.67 (0.44-1.09) | 1590 (9.9)                               | 0.88 (0.66-1.17) | 0.86 (0.64-1.15) |
| <b>Discrimination</b>  |                                    |                  |                  |                                      |                  |                  |                                          |                  |                  |
| <b>Europe</b>          |                                    |                  |                  |                                      |                  |                  |                                          |                  |                  |
| No                     | 1899 (8.5)                         | 1.00 (Reference) | 1.00 (Reference) | 1867 (2.6)                           | 1.00 (Reference) | 1.00 (Reference) | 1832 (8.9)                               | 1.00 (Reference) | 1.00 (Reference) |

|    |                            |             |                  |                   |            |                         |                         |             |                  |                  |
|----|----------------------------|-------------|------------------|-------------------|------------|-------------------------|-------------------------|-------------|------------------|------------------|
| 1  |                            |             |                  |                   |            |                         |                         |             |                  |                  |
| 2  |                            |             |                  |                   |            |                         |                         |             |                  |                  |
| 3  |                            |             |                  |                   |            |                         |                         |             |                  |                  |
| 4  | Yes                        | 810 (7.4)   | 0.87 (0.64-1.19) | 0.92 (0.67-1.26)  | 791 (2.2)  | 0.83 (0.47-1.47)        | 0.84 (0.46-1.52)        | 782 (7.3)   | 0.82 (0.59-1.12) | 0.84 (0.60-1.16) |
| 5  |                            |             |                  |                   |            |                         |                         |             |                  |                  |
| 6  | <b>Ghana</b>               |             |                  |                   |            |                         |                         |             |                  |                  |
| 7  |                            |             |                  |                   |            |                         |                         |             |                  |                  |
| 8  | No                         | 2034 (10.0) | 1.00 (Reference) | 1.00 (Reference)  | 2047 (3.9) | 1.00 (Reference)        | 1.00 (Reference)        | 2031 (10.6) | 1.00 (Reference) | 1.00 (Reference) |
| 9  |                            |             |                  |                   |            |                         |                         |             |                  |                  |
| 10 |                            |             |                  |                   |            |                         |                         |             |                  |                  |
| 11 | Yes                        | 104 (7.7)   | 0.83 (0.39-1.73) | 0.91 (0.67-1.24)  | 104 (1.9)  | 0.67 (0.15-2.85)        | 0.67 (0.16-2.84)        | 104 (6.7)   | 0.70 (0.32-1.55) | 0.71 (0.32-1.55) |
| 12 |                            |             |                  |                   |            |                         |                         |             |                  |                  |
| 13 |                            |             |                  |                   |            |                         |                         |             |                  |                  |
| 14 | <b>Stress at home/work</b> |             |                  |                   |            |                         |                         |             |                  |                  |
| 15 |                            |             |                  |                   |            |                         |                         |             |                  |                  |
| 16 | <b>Europe</b>              |             |                  |                   |            |                         |                         |             |                  |                  |
| 17 |                            |             |                  |                   |            |                         |                         |             |                  |                  |
| 18 | Never                      | 1330 (8.2)  | 1.00 (Reference) | 1.00 (Reference)  | 1305 (3.4) | 1.00 (Reference)        | 1.00 (Reference)        | 1282 (8.5)  | 1.00 (Reference) | 1.00 (Reference) |
| 19 |                            |             |                  |                   |            |                         |                         |             |                  |                  |
| 20 | Some stress                | 1002 (7.9)  | 0.97 (0.72-1.31) | 1.04 (0.76-1.42)  | 984 (1.4)  | <b>0.47 (0.26-0.87)</b> | <b>0.46 (0.24-0.88)</b> | 968 (8.6)   | 0.96 (0.71-1.30) | 1.02 (0.74-1.39) |
| 21 |                            |             |                  |                   |            |                         |                         |             |                  |                  |
| 22 | Several/Permanent stresses | 397 (9.1)   | 1.11 (0.74-1.64) | 1.153 (0.77-1.72) | 390 (2.3)  | 0.73 (0.35-1.52)        | 0.76 (0.36-1.61)        | 383 (9.7)   | 1.13 (0.77-1.68) | 1.19 (0.80-1.79) |
| 23 |                            |             |                  |                   |            |                         |                         |             |                  |                  |
| 24 | <b>Ghana</b>               |             |                  |                   |            |                         |                         |             |                  |                  |
| 25 |                            |             |                  |                   |            |                         |                         |             |                  |                  |
| 26 | Never                      | 682 (10.3)  | 1.00 (Reference) | 1.00 (Reference)  | 688 (3.3)  | 1.00 (Reference)        | 1.00 (Reference)        | 682 (9.9)   | 1.00 (Reference) | 1.00 (Reference) |
| 27 |                            |             |                  |                   |            |                         |                         |             |                  |                  |
| 28 | Some stress                | 1279 (9.5)  | 0.87 (0.64-1.19) | 0.80 (0.59-1.11)  | 1279 (3.9) | 1.06 (0.63-1.77)        | 1.11 (0.66-1.87)        | 1274 (10.3) | 0.95 (0.69-1.30) | 0.92 (0.67-1.26) |
| 29 |                            |             |                  |                   |            |                         |                         |             |                  |                  |
| 30 | Several/Permanent stresses | 365 (8.5)   | 0.75 (0.48-1.18) | 0.68 (0.59-1.11)  | 369 (4.1)  | 1.13 (0.57-2.23)        | 1.22 (0.61-2.46)        | 365 (10.4)  | 0.96 (0.63-1.47) | 0.92 (0.59-1.42) |
| 31 |                            |             |                  |                   |            |                         |                         |             |                  |                  |
| 32 |                            |             |                  |                   |            |                         |                         |             |                  |                  |
| 33 | <b>Depressive symptoms</b> |             |                  |                   |            |                         |                         |             |                  |                  |
| 34 |                            |             |                  |                   |            |                         |                         |             |                  |                  |
| 35 | <b>Europe</b>              |             |                  |                   |            |                         |                         |             |                  |                  |
| 36 |                            |             |                  |                   |            |                         |                         |             |                  |                  |
| 37 | No                         | 2505        | 1.00             | 1.00              | 2457       | 1.00                    | 1.00                    | 2416        | 1.00             | 1.00             |
| 38 |                            |             |                  |                   |            |                         |                         |             |                  |                  |
| 39 |                            |             |                  |                   |            |                         |                         |             |                  |                  |
| 40 |                            |             |                  |                   |            |                         |                         |             |                  |                  |
| 41 |                            |             |                  |                   |            |                         |                         |             |                  |                  |
| 42 |                            |             |                  |                   |            |                         |                         |             |                  |                  |
| 43 |                            |             |                  |                   |            |                         |                         |             |                  |                  |
| 44 |                            |             |                  |                   |            |                         |                         |             |                  |                  |
| 45 |                            |             |                  |                   |            |                         |                         |             |                  |                  |
| 46 |                            |             |                  |                   |            |                         |                         |             |                  |                  |
| 47 |                            |             |                  |                   |            |                         |                         |             |                  |                  |

|              |            |                  |                  |            |                  |                  |             |                  |                  |
|--------------|------------|------------------|------------------|------------|------------------|------------------|-------------|------------------|------------------|
|              | (8.5)      | (Reference)      | (Reference)      | (2.7)      | (Reference)      | (Reference)      | (8.7)       | (Reference)      | (Reference)      |
| Yes          | 206 (6.3)  | 0.71 (0.39-1.27) | 0.76 (0.43-1.36) | 202 (1.5)  | 0.63 (0.19-2.03) | 0.68 (0.21-2.23) | 199 (7.1)   | 0.78 (0.44-1.37) | 0.83 (0.47-1.46) |
| <b>Ghana</b> |            |                  |                  |            |                  |                  |             |                  |                  |
| No           | 2212 (9.9) | 1.00 (Reference) | 1.00 (Reference) | 2222 (3.8) | 1.00 (Reference) | 1.00 (Reference) | 2207 (10.4) | 1.00 (Reference) | 1.00 (Reference) |
| Yes          | 114 (5.3)  | 0.45 (0.19-1.03) | 0.45 (0.19-1.01) | 114 (2.6)  | 0.52 (0.16-1.72) | 0.53 (0.17-1.74) | 114 (7.9)   | 0.62 (0.30-1.25) | 0.61 (0.30-1.24) |

Model 1, adjusted for age and sex; Model 2, adjusted for age, sex, and educational level for Ghanaians (SSA) and length of stay for those in Europe; Abbreviations: CI, confidence interval; ACR, albumin creatinine ration; eGFR, estimated glomerular filtration rate; CKD, chronic kidney disease; OR, odds ratio, n= total number of Ghanaians living in Ghana and Europe among the various levels of PS constructs; %, proportion of individuals with CKD among the various levels of PS constructs in Ghana and Europe



1  
2  
3 Table 4 shows associations between all 4 constructs of PS and CKD stratified  
4 by Ghanaians living in urban and rural Ghana. There was no association  
5  
6 between PS and albuminuria, reduced eGFR and CKD risk among Ghanaians  
7  
8 living rural and urban Ghana.  
9  
10  
11  
12  
13  
14  
15  
16  
17  
18  
19  
20  
21  
22  
23  
24  
25  
26  
27  
28  
29  
30  
31  
32  
33  
34  
35  
36  
37  
38  
39  
40  
41  
42  
43  
44  
45  
46  
47  
48  
49  
50  
51  
52  
53  
54  
55  
56  
57  
58  
59  
60

**Table 4: Association of psychosocial stressors (PS) indicators (negative life events, discrimination, stress at work/home and depressive symptoms) with albuminuria, reduced eGFR and CKD risk among rural and urban Ghana**

|                        | Albuminuria (ACR $\geq$ 3 mg/mmol) |                  |                  | eGFR < 60 mL/min/1.73 m <sup>2</sup> |                  |                  | High to very high CKD risk (KDIGO, 2012) |                  |                  |
|------------------------|------------------------------------|------------------|------------------|--------------------------------------|------------------|------------------|------------------------------------------|------------------|------------------|
|                        | n (%)                              | OR (95% CI)      |                  | n (%)                                | OR (95% CI)      |                  | n cases (%)                              | OR (95% CI)      |                  |
|                        |                                    | Model 1          | Model 2          |                                      | Model 1          | Model 2          |                                          | Model 1          | Model 2          |
| <b>Negative events</b> |                                    |                  |                  |                                      |                  |                  |                                          |                  |                  |
| <b>Urban Ghana</b>     |                                    |                  |                  |                                      |                  |                  |                                          |                  |                  |
| No                     | 477 (11.9)                         | 1.00 (Reference) | 1.00 (Reference) | 477 (4.4)                            | 1.00 (Reference) | 1.00 (Reference) | 477 (12.2)                               | 1.00 (Reference) | 1.00 (Reference) |
| Yes                    | 912 (10.5)                         | 0.87 (0.61-1.23) | 0.87 (0.61-1.24) | 911 (3.4)                            | 0.73 (0.41-1.31) | 0.72 (0.40-1.29) | 910 (10.8)                               | 0.87 (0.61-1.24) | 0.87 (0.61-1.25) |
| <b>Rural Ghana</b>     |                                    |                  |                  |                                      |                  |                  |                                          |                  |                  |
| No                     | 255 (7.5)                          | 1.00 (Reference) | 1.00 (Reference) | 259 (4.6)                            | 1.00 (Reference) | 1.00 (Reference) | 255 (8.6)                                | 1.00 (Reference) | 1.00 (Reference) |
| Yes                    | 683 (7.6)                          | 0.97 (0.55-1.69) | 0.94 (0.54-1.64) | 690 (3.5)                            | 0.63 (0.31-1.31) | 0.66 (0.32-1.37) | 680 (8.8)                                | 0.93 (0.55-1.58) | 0.92 (0.54-1.56) |
| <b>Discrimination</b>  |                                    |                  |                  |                                      |                  |                  |                                          |                  |                  |
| <b>Urban Ghana</b>     |                                    |                  |                  |                                      |                  |                  |                                          |                  |                  |
| No                     | 1326 (11.1)                        | 1.00 (Reference) | 1.00 (Reference) | 1326 (3.9)                           | 1.00 (Reference) | 1.00 (Reference) | 1325 (11.4)                              | 1.00 (Reference) | 1.00 (Reference) |

|    |                                |               |                      |                      |              |                      |                      |               |                      |                     |
|----|--------------------------------|---------------|----------------------|----------------------|--------------|----------------------|----------------------|---------------|----------------------|---------------------|
| 1  |                                |               |                      |                      |              |                      |                      |               |                      |                     |
| 2  |                                |               |                      |                      |              |                      |                      |               |                      |                     |
| 3  |                                |               |                      |                      |              |                      |                      |               |                      |                     |
| 4  | Yes                            | 71 (8.5)      | 0.85 (0.36-<br>2.00) | 0.89 (0.37-<br>2.11) | 71 (2.8)     | 1.17 (0.27-<br>2.09) | 1.16 (0.27-<br>2.06) | 71 (7.1)      | 0.69 (0.27-<br>1.77) | 0.72 (0.28-1.83)    |
| 5  |                                |               |                      |                      |              |                      |                      |               |                      |                     |
| 6  | <b>Rural Ghana</b>             |               |                      |                      |              |                      |                      |               |                      |                     |
| 7  |                                |               |                      |                      |              |                      |                      |               |                      |                     |
| 8  | No                             | 708 (8.1)     | 1.00<br>(Reference)  | 1.00<br>(Reference)  | 721<br>(3.9) | 1.00<br>(Reference)  | 1.00<br>(Reference)  | 706 (9.2)     | 1.00<br>(Reference)  | 1.00<br>(Reference) |
| 9  |                                |               |                      |                      |              |                      |                      |               |                      |                     |
| 10 | Yes                            | 33 (6.1)      | 0.79 (0.18-<br>3.47) | 0.84 (0.19-<br>2.65) | 33 (0.0)     | ***                  | ***                  | 33<br>(6.1)   | 0.75 (0.17-<br>2.89) | 0.83 (0.19-2.65)    |
| 11 |                                |               |                      |                      |              |                      |                      |               |                      |                     |
| 12 |                                |               |                      |                      |              |                      |                      |               |                      |                     |
| 13 | <b>Stress at</b>               |               |                      |                      |              |                      |                      |               |                      |                     |
| 14 | <b>home/work</b>               |               |                      |                      |              |                      |                      |               |                      |                     |
| 15 |                                |               |                      |                      |              |                      |                      |               |                      |                     |
| 16 | <b>Urban Ghana</b>             |               |                      |                      |              |                      |                      |               |                      |                     |
| 17 |                                |               |                      |                      |              |                      |                      |               |                      |                     |
| 18 | Never                          | 460<br>(10.9) | 1.00<br>(Reference)  | 1.00<br>(Reference)  | 460<br>(3.3) | 1.00<br>(Reference)  | 1.00<br>(Reference)  | 460<br>(10.2) | 1.00<br>(Reference)  | 1.00<br>(Reference) |
| 19 |                                |               |                      |                      |              |                      |                      |               |                      |                     |
| 20 | Some stress                    | 732<br>(11.5) | 1.04 (0.71-<br>1.51) | 0.91 (0.62-<br>1.37) | 730<br>(4.1) | 1.27 (0.66-<br>2.43) | 1.30 (0.67-<br>2.51) | 730<br>(11.8) | 1.13 (0.77-<br>1.65) | 1.04 (0.71-1.53)    |
| 21 |                                |               |                      |                      |              |                      |                      |               |                      |                     |
| 22 | Several/Perman<br>ent stresses | 197 (9.6)     | 0.87 (0.50-<br>1.52) | 0.74 (0.42-<br>1.02) | 198<br>(3.5) | 1.17 (0.46-<br>2.84) | 1.20 (0.47-<br>3.09) | 197<br>(11.7) | 1.15 (0.68-<br>1.71) | 1.05 (0.61-1.81)    |
| 23 |                                |               |                      |                      |              |                      |                      |               |                      |                     |
| 24 | <b>Rural Ghana</b>             |               |                      |                      |              |                      |                      |               |                      |                     |
| 25 |                                |               |                      |                      |              |                      |                      |               |                      |                     |
| 26 | Never                          | 222 (9.0)     | 1.00<br>(Reference)  | 1.00<br>(Reference)  | 228<br>(3.5) | 1.00<br>(Reference)  | 1.00<br>(Reference)  | 222 (9.5)     | 1.00<br>(Reference)  | 1.00<br>(Reference) |
| 27 |                                |               |                      |                      |              |                      |                      |               |                      |                     |
| 28 | Some stress                    | 547 (6.9)     | 0.69 (0.39-<br>1.23) | 0.68 (0.38-<br>1.22) | 549<br>(3.6) | 0.88 (0.38-<br>2.07) | 0.92 (0.39-<br>2.18) | 544 (8.3)     | 0.74 (0.42-<br>1.30) | 0.75 (0.42-1.31)    |
| 29 |                                |               |                      |                      |              |                      |                      |               |                      |                     |
| 30 | Several/Perman<br>ent stresses | 168 (7.1)     | 0.63 (0.30-<br>1.37) | 0.60 (0.28-<br>1.29) | 171<br>(4.7) | 1.07(0.38-<br>3.03)  | 1.21(0.43-<br>3.46)  | 168 (8.9)     | 0.71 (0.34-<br>1.50) | 0.73 (0.35-1.50)    |
| 31 |                                |               |                      |                      |              |                      |                      |               |                      |                     |
| 32 |                                |               |                      |                      |              |                      |                      |               |                      |                     |
| 33 | <b>Depressive</b>              |               |                      |                      |              |                      |                      |               |                      |                     |
| 34 | <b>symptoms</b>                |               |                      |                      |              |                      |                      |               |                      |                     |
| 35 |                                |               |                      |                      |              |                      |                      |               |                      |                     |
| 36 | <b>Urban Ghana</b>             |               |                      |                      |              |                      |                      |               |                      |                     |
| 37 |                                |               |                      |                      |              |                      |                      |               |                      |                     |
| 38 | No                             | 1336          | 1.00                 | 1.00                 | 1335         | 1.00                 | 1.00                 | 1334          | 1.00                 | 1.00                |
| 39 |                                |               |                      |                      |              |                      |                      |               |                      |                     |
| 40 |                                |               |                      |                      |              |                      |                      |               |                      |                     |
| 41 |                                |               |                      |                      |              |                      |                      |               |                      |                     |
| 42 |                                |               |                      |                      |              |                      |                      |               |                      |                     |
| 43 |                                |               |                      |                      |              |                      |                      |               |                      |                     |
| 44 |                                |               |                      |                      |              |                      |                      |               |                      |                     |
| 45 |                                |               |                      |                      |              |                      |                      |               |                      |                     |
| 46 |                                |               |                      |                      |              |                      |                      |               |                      |                     |
| 47 |                                |               |                      |                      |              |                      |                      |               |                      |                     |

|                    |           |                  |                  |           |                  |                  |           |                  |                  |
|--------------------|-----------|------------------|------------------|-----------|------------------|------------------|-----------|------------------|------------------|
|                    | (11.3)    | (Reference)      | (Reference)      | (3.8)     | (Reference)      | (Reference)      | (11.5)    | (Reference)      | (Reference)      |
| Yes                | 52 (3.9)  | 0.30 (0.07-1.25) | 0.30 (0.07-1.27) | 52 (1.9)  | 0.46 (0.06-2.50) | 0.45 (0.06-2.13) | 52 (5.8)  | 0.44 (0.14-1.45) | 0.45 (0.14-1.48) |
| <b>Rural Ghana</b> |           |                  |                  |           |                  |                  |           |                  |                  |
| No                 | 876 (7.7) | 1.00 (Reference) | 1.00 (Reference) | 887 (3.8) | 1.00 (Reference) | 1.00 (Reference) | 873 (8.7) | 1.00 (Reference) | 1.00 (Reference) |
| Yes                | 62 (6.5)  | 0.67 (0.23-1.94) | 0.67 (0.23-1.94) | 62 (3.2)  | 0.58 (0.13-2.56) | 0.61 (0.14-2.68) | 62 (9.7)  | 0.82 (0.33-2.01) | 0.85 (0.34-2.09) |

Model 1, adjusted for age and sex; Model 2, adjusted for age, sex, and educational level; Abbreviations: CI, confidence interval; ACR, albumin creatinine ration; eGFR, estimated glomerular filtration rate; CKD, chronic kidney disease; OR, odds ratio, n= total number of Ghanaians living in urban and rural Ghana among the various levels of PS constructs; %, proportion of individuals with CKD among the various levels of PS constructs in rural and urban Ghana. \*\*\*; no case of CKD and therefore odds ratios were not calculated

1  
2  
3  
4  
5  
6  
7  
8  
9  
10  
11  
12  
13  
14  
15  
16  
17  
18  
19  
20  
21  
22  
23  
24  
25  
26  
27  
28  
29  
30  
31  
32  
33  
34  
35  
36  
37  
38  
39  
40  
41  
42  
43  
44  
45  
46  
47

For peer review only

1  
2  
3 Table 5 shows associations between all 4 constructs of PS and CKD stratified by  
4  
5  
6  
7  
8  
9  
10  
11  
12  
13  
14  
15  
16  
17  
18  
19  
20  
21  
22  
23  
24  
25  
26  
27  
28  
29  
30  
31  
32  
33  
34  
35  
36  
37  
38  
39  
40  
41  
42  
43  
44  
45  
46  
47  
48  
49  
50  
51  
52  
53  
54  
55  
56  
57  
58  
59  
60

Table 5 shows associations between all 4 constructs of PS and CKD stratified by  
Ghanaians living in Amsterdam, Berlin and London. There was no association between  
PS and albuminuria, reduced eGFR and CKD risk among Ghanaians living Amsterdam,  
Berlin and London except for positive association between stress at work/home and  
albuminuria and CKD risk among Ghanaians living in Berlin.

1  
2  
3  
4  
5  
6  
7  
8  
9  
10  
11  
12  
13  
14  
15  
16  
17  
18  
19  
20  
21  
22  
23  
24  
25  
26  
27  
28  
29  
30  
31  
32  
33  
34  
35  
36  
37  
38  
39  
40  
41  
42  
43  
44  
45  
46  
47

**Table 5: Association of psychosocial stressors (PS) indicators (negative life events, discrimination, stress at work/home and depressive symptoms) with albuminuria, reduced eGFR and CKD risk among Ghanaians in three European cities.**

|                        | Albuminuria (ACR ≥ 3 mg/mmol) |                     |                     | eGFR < 60 mL/min/1.73 m2 |                     |                     | High to very high CKD risk (KDIGO, 2012) |                     |                     |
|------------------------|-------------------------------|---------------------|---------------------|--------------------------|---------------------|---------------------|------------------------------------------|---------------------|---------------------|
|                        | n (%)                         | OR (95% CI)         |                     | n (%)                    | OR (95% CI)         |                     | n (%)                                    | OR (95% CI)         |                     |
|                        |                               | Model 1             | Model 2             |                          | Model 1             | Model 2             |                                          | Model 1             | Model 2             |
| <b>Negative events</b> |                               |                     |                     |                          |                     |                     |                                          |                     |                     |
| <b>Amsterdam</b>       |                               |                     |                     |                          |                     |                     |                                          |                     |                     |
| No                     | 548 (7.3)                     | 1.00<br>(Reference) | 1.00<br>(Reference) | 534<br>(2.4)             | 1.00<br>(Reference) | 1.00<br>(Reference) | 521 (7.5)                                | 1.00<br>(Reference) | 1.00<br>(Reference) |
| Yes                    | 784 (7.8)                     | 1.08 (0.71-1.63)    | 1.18 (0.77-1.81)    | 764<br>(2.9)             | 1.11 (0.55-2.23)    | 1.15 (0.55-2.37)    | 742 (8.0)                                | 1.06 (0.69-1.62)    | 1.08 (0.71-1.66)    |
| <b>Berlin</b>          |                               |                     |                     |                          |                     |                     |                                          |                     |                     |
| No                     | 213 (9.9)                     | 1.00<br>(Reference) | 1.00<br>(Reference) | 213<br>(2.4)             | 1.00<br>(Reference) | 1.00<br>(Reference) | 213 (10.8)                               | 1.00<br>(Reference) | 1.00<br>(Reference) |
| Yes                    | 329<br>(10.9)                 | 1.12 (0.63-1.99)    | 1.19 (0.67-2.15)    | 330<br>(1.8)             | 0.64 (0.19-2.17)    | 0.61 (0.18-2.11)    | 329 (9.4)                                | 0.86 (0.48-1.52)    | 0.91 (0.51-1.63)    |
| <b>London</b>          |                               |                     |                     |                          |                     |                     |                                          |                     |                     |
| No                     | 367 (8.7)                     | 1.00<br>(Reference) | 1.00<br>(Reference) | 359<br>(3.1)             | 1.00<br>(Reference) | 1.00<br>(Reference) | 356 (8.7)                                | 1.00<br>(Reference) | 1.00<br>(Reference) |
| Yes                    | 502 (7.8)                     | 0.89 (0.55-1.44)    | 0.83 (0.49-1.41)    | 493                      | 0.68 (0.28-1.68)    | 0.58 (0.22-1.48)    | 486 (9.1)                                | 1.04 (0.64-1.68)    | 0.99 (0.58-1.68)    |

|                            |            |                      |                      |              |                      |                      |              |                      |                     |
|----------------------------|------------|----------------------|----------------------|--------------|----------------------|----------------------|--------------|----------------------|---------------------|
|                            |            | 1.46)                | 1.41)                | (2.2)        | 1.65)                | 1.51)                |              | 1.68)                |                     |
| <b>Discrimination</b>      |            |                      |                      |              |                      |                      |              |                      |                     |
| <b>Amsterdam</b>           |            |                      |                      |              |                      |                      |              |                      |                     |
| No                         | 956 (8.3)  | 1.00<br>(Reference)  | 1.00<br>(Reference)  | 935<br>(2.9) | 1.00<br>(Reference)  | 1.00<br>(Reference)  | 909 (8.5)    | 1.00<br>(Reference)  | 1.00<br>(Reference) |
| Yes                        | 363 (5.0)  | 0.59 (0.34-<br>1.00) | 0.59 (0.35-<br>1.02) | 349<br>(2.1) | 0.69 (0.30-<br>1.62) | 0.81 (0.34-<br>1.91) | 342 (5.9)    | 0.69 (0.41-<br>1.14) | 0.69 (0.41-1.16)    |
| <b>Berlin</b>              |            |                      |                      |              |                      |                      |              |                      |                     |
| No                         | 329(10.0)  | 1.00<br>(Reference)  | 1.00<br>(Reference)  | 329<br>(2.1) | 1.00<br>(Reference)  | 1.00<br>(Reference)  | 329 (10.3)   | 1.00<br>(Reference)  | 1.00<br>(Reference) |
| Yes                        | 209 (11.0) | 1.11 (0.63-<br>1.95) | 1.16 (0.65-<br>2.05) | 210<br>(1.9) | 0.83 (0.24-<br>2.93) | 0.82 (0.23-<br>2.91) | 209 (9.1)    | 0.86 (0.48-<br>1.56) | 0.89 (0.49-1.63)    |
| <b>London</b>              |            |                      |                      |              |                      |                      |              |                      |                     |
| No                         | 614 (7.9)  | 1.00<br>(Reference)  | 1.00<br>(Reference)  | 603<br>(2.5) | 1.00<br>(Reference)  | 1.00<br>(Reference)  | 594 (8.9)    | 1.00<br>(Reference)  | 1.00<br>(Reference) |
| Yes                        | 238 (7.9)  | 1.03 (0.59-<br>1.81) | 1.18 (0.65-<br>2.15) | 232<br>(2.6) | 1.29 (0.46-<br>3.59) | 1.09 (0.35-<br>3.43) | 231<br>(7.8) | 0.93 (0.53-<br>1.63) | 0.98 (0.52-1.82)    |
| <b>Stress at home/work</b> |            |                      |                      |              |                      |                      |              |                      |                     |
| <b>Amsterdam</b>           |            |                      |                      |              |                      |                      |              |                      |                     |
| Never                      | 634 (8.4)  | 1.00<br>(Reference)  | 1.00<br>(Reference)  | 622<br>(3.2) | 1.00<br>(Reference)  | 1.00<br>(Reference)  | 603 (8.0)    | 1.00<br>(Reference)  | 1.00<br>(Reference) |
| Some stress                | 478 (5.7)  | 0.68 (0.42-<br>1.11) | 0.69 (0.42-<br>1.13) | 462<br>(1.9) | 0.64 (0.29-<br>1.43) | 0.68 (0.30-<br>1.52) | 452 (6.0)    | 0.74 (0.45-<br>1.20) | 0.74 (0.45-1.22)    |
| Several/Permanent stresses | 210 (9.1)  | 1.09 (0.63-<br>1.91) | 1.12 (0.64-<br>1.95) | 204<br>(2.5) | 0.71 (0.26-<br>1.95) | 0.77 (0.28-<br>2.14) | 198 (10.1)   | 1.24 (0.71-<br>2.14) | 1.26 (0.73-2.20)    |



|    |                   |            |                    |                    |          |             |             |            |                         |                         |
|----|-------------------|------------|--------------------|--------------------|----------|-------------|-------------|------------|-------------------------|-------------------------|
| 1  |                   |            |                    |                    |          |             |             |            |                         |                         |
| 2  |                   |            |                    |                    |          |             |             |            |                         |                         |
| 3  |                   |            |                    |                    |          |             |             |            |                         |                         |
| 4  | <b>Berlin</b>     |            |                    |                    |          |             |             |            |                         |                         |
| 5  |                   | 250        | 1.00               | 1.00               | 250      | 1.00        | 1.00        | 1.00       | 1.00                    |                         |
| 6  | Never             | (9.0)      | (Reference)        | (Reference)        | (2.0)    | (Reference) | (Reference) | 250 (6.4)  | (Reference) (Reference) |                         |
| 7  |                   |            |                    |                    |          |             |             |            |                         |                         |
| 8  |                   |            |                    |                    |          |             |             |            |                         |                         |
| 9  | Some stress       | 196        | <b>2.50 (1.33-</b> | <b>2.81 (1.46-</b> | 197      | 0.88 (0.20- | 0.83 (0.19- |            | <b>2.57 (1.34-</b>      | <b>2.78 (1.43-5.43)</b> |
| 10 |                   | (15.3)     | <b>4.71)</b>       | <b>5.40)</b>       | (1.5)    | 3.79)       | 3.62)       | 196 (14.8) | <b>4.90)</b>            |                         |
| 11 |                   |            |                    |                    |          |             |             |            |                         |                         |
| 12 |                   |            |                    |                    |          |             |             |            |                         |                         |
| 13 | Several/Perman    |            |                    |                    |          |             |             |            |                         |                         |
| 14 | ent stresses      |            | 1.64 (0.72-        | 1.69 (0.73-        | 197      | 2.10 (0.47- | 2.04 (0.44- |            | 1.52 (0.65-             | 1.58 (0.66-3.75)        |
| 15 |                   | 96 (10.4)  | 3.73)              | 3.91)              | (3.1)    | 9.46)       | 9.26)       | 76 (9.4)   | 3.58)                   |                         |
| 16 |                   |            |                    |                    |          |             |             |            |                         |                         |
| 17 |                   |            |                    |                    |          |             |             |            |                         |                         |
| 18 | <b>London</b>     |            |                    |                    |          |             |             |            |                         |                         |
| 19 |                   |            | 1.00               | 1.00               | 433      | 1.00        | 1.00        |            | 1.00                    | 1.00                    |
| 20 | Never             | 446 (9.2)  | (Reference)        | (Reference)        | (4.4)    | (Reference) | (Reference) | 429 (10.5) | (Reference)             | (Reference)             |
| 21 |                   |            |                    |                    |          |             |             |            |                         |                         |
| 22 | Some stress       | 328 (7.0)  | 0.73 (0.43-        | 0.79 (0.44-        | 325      | 0.17 (0.04- | 0.09 (0.01- |            | 0.65 (0.38-             | 0.66 (0.37-1.19)        |
| 23 |                   |            | 1.25)              | 1.40)              | (0.6)    | 0.73)       | 0.67)       | 320 (6.9)  | 1.10)                   |                         |
| 24 |                   |            |                    |                    |          |             |             |            |                         |                         |
| 25 | Several/perman    | 91 (7.7)   | 0.81 (0.35-        | 0.86 (0.35-        | 90 (1.1) | 0.27 (0.03- | 0.24 (0.03- |            | 0.83 (0.38-             | 0.92 (0.39-2.16)        |
| 26 | ent stresses      |            | 1.87)              | 2.14)              |          | 2.12)       | 2.05)       | 74 (8.9)   | 1.83)                   |                         |
| 27 |                   |            |                    |                    |          |             |             |            |                         |                         |
| 28 | <b>Depressive</b> |            |                    |                    |          |             |             |            |                         |                         |
| 29 | <b>symptoms</b>   |            |                    |                    |          |             |             |            |                         |                         |
| 30 |                   |            |                    |                    |          |             |             |            |                         |                         |
| 31 | <b>Amsterdam</b>  |            |                    |                    |          |             |             |            |                         |                         |
| 32 |                   | 1199       | 1.00               | 1.00               | 1135     | 1.00        | 1.00        |            | 1.00                    | 1.00                    |
| 33 | No                | (7.8)      | (Reference)        | (Reference)        | (2.8)    | (Reference) | (Reference) | 1135 (7.9) | (Reference)             | (Reference)             |
| 34 |                   |            |                    |                    |          |             |             |            |                         |                         |
| 35 | Yes               | 121 (6.6)  | 0.81 (0.39-        | 0.83 (0.39-        | 118      | 0.65 (0.15- | 0.71 (0.16- |            | 0.83 (0.39-             | 0.82 (0.38-1.74)        |
| 36 |                   |            | 1.72)              | 1.76)              | (1.7)    | 2.77)       | 3.06)       | 116 (6.9)  | 1.76)                   |                         |
| 37 |                   |            |                    |                    |          |             |             |            |                         |                         |
| 38 | <b>Berlin</b>     |            |                    |                    |          |             |             |            |                         |                         |
| 39 |                   |            | 1.00               | 1.00               | 504      | 1.00        | 1.00        |            | 1.00                    | 1.00                    |
| 40 | No                | 503 (10.7) | (Reference)        | (Reference)        | (2.2)    | (Reference) | (Reference) | 503 (10.1) | (Reference)             | (Reference)             |
| 41 |                   |            |                    |                    |          |             |             |            |                         |                         |
| 42 |                   |            |                    |                    |          |             |             |            |                         |                         |
| 43 |                   |            |                    |                    |          |             |             |            |                         |                         |
| 44 |                   |            |                    |                    |          |             |             |            |                         |                         |
| 45 |                   |            |                    |                    |          |             |             |            |                         |                         |
| 46 |                   |            |                    |                    |          |             |             |            |                         |                         |
| 47 |                   |            |                    |                    |          |             |             |            |                         |                         |

|    |               |           |                  |                  |           |                  |                  |           |                  |                  |
|----|---------------|-----------|------------------|------------------|-----------|------------------|------------------|-----------|------------------|------------------|
| 1  |               |           |                  |                  |           |                  |                  |           |                  |                  |
| 2  |               |           |                  |                  |           |                  |                  |           |                  |                  |
| 3  |               |           |                  |                  |           |                  |                  |           |                  |                  |
| 4  | Yes           | 34 (5.9)  | 0.53 (0.12-2.27) | 0.49 (0.11-2.13) | 34 (0.0)  | ***              | ***              | 34 (5.9)  | 0.55 (0.13-2.37) | 0.52 (0.12-2.24) |
| 5  |               |           |                  |                  |           |                  |                  |           |                  |                  |
| 6  | <b>London</b> |           |                  |                  |           |                  |                  |           |                  |                  |
| 7  |               |           |                  |                  |           |                  |                  |           |                  |                  |
| 8  | No            | 803 (8.3) | 1.00 (Reference) | 1.00 (Reference) | 785 (2.6) | 1.00 (Reference) | 1.00 (Reference) | 778 (8.9) | 1.00 (Reference) | 1.00 (Reference) |
| 9  |               |           |                  |                  |           |                  |                  |           |                  |                  |
| 10 |               |           |                  |                  |           |                  |                  |           |                  |                  |
| 11 | Yes           | 51 (5.9)  | 0.67 (0.20-2.21) | 0.91 (0.27-3.07) | 50 (2.0)  | 0.91 (0.11-7.43) | 1.15 (0.14-9.54) | 49 (8.2)  | 0.94 (0.33-2.69) | 1.30 (0.44-3.81) |
| 12 |               |           |                  |                  |           |                  |                  |           |                  |                  |

Model 1, adjusted for age and sex; Model 2, adjusted for age, sex, educational level and length of stay; Abbreviations: CI, confidence interval; ACR, albumin creatinine ratio; eGFR, estimated glomerular filtration rate; CKD, chronic kidney disease; OR, odds ratio, n= total number of Ghanaians living in Amsterdam, Berlin and London among the various levels of PS constructs; %, proportion of individuals with CKD among the various levels of PS constructs in Europe \*\*\*; no case of CKD and therefore odds ratios were not calculated.

Peer review only

## Discussion

### Key findings

Whereas there was an association between those who have experienced some stress at home/work and reduced eGFR among Ghanaians living in Europe, we did not find any association between PS and CKD among Ghanaians living in rural and urban Ghana and their peers in Europe. Also, PS was not associated with CKD for those living in rural and urban Ghana and neither for those living in the three European cities. However, there was an association between stress at work/home and albuminuria and CKD risk among Ghanaians living in Berlin. Further adjustment for conventional risk factors of CKD yielded similar results.

### Discussion of key findings

#### Association between PS and CKD in Ghana

Our study did not find any association between any of the four constructs of PS and prevalence of CKD (albuminuria, reduced eGFR and CKD risk) among Ghanaians living in rural and urban Ghana. Our findings are however in contrast with earlier studies which reported positive associations between PS and prevalent of CKD (22, 26, 48). Other studies have hypothesised that the influence of PS on CKD may be important in only those with hypertension and diabetes and that PS may mediate or moderate the association between renal functioning and lifestyle behaviours such as smoking and physical activity (28). For example, they argue that stress enhances

1  
2  
3 Sympathetic Nervous System (SNS) activity to increase glucocorticoid secretion and  
4  
5  
6 inflammatory cytokines, which heavily contribute to hypertension, diabetes and vascular  
7  
8 disease which are major risk factors of CKD incidence and prevalence (49). We did  
9  
10 not find any literature on the association between PS and CKD prevalence in rural and  
11  
12 urban populations. Worth noting, however, is the presence of rich family support  
13  
14 systems in the Ghanaian context especially in rural Ghana which may help individuals  
15  
16 with CKD to cope with PS thereby minimizing its effect. For example, patients with  
17  
18 limited social networks and low social support have been shown to have augmented  
19  
20 risk of morbidity and mortality (50-52). Specifically, there is evidence that positive  
21  
22 social support is a protective factor for persons dealing with long-term disease  
23  
24 conditions (53). Other studies have reported a protective relationship between social  
25  
26 networks, emotionally supportive relationship and threats to physiological and  
27  
28 psychosocial health (54).  
29  
30  
31  
32  
33  
34  
35  
36  
37  
38

### 39 **Association between PS and CKD Amsterdam, Berlin and London**

40  
41  
42 Literature on the association between PS and CKD prevalence among migrants is  
43  
44 scant and absent in most European populations. The lack of positive association  
45  
46 between PS and CKD in our study is consistent with recent studies conducted among  
47  
48 African Americans (26, 28) and other populations (27, 55). Specifically, a recent study  
49  
50 using data from the Jackson Heart Study which comprised of extensive constructs of  
51  
52 psychosocial variables reported that greater life stressors were associated with lower  
53  
54 prevalence of CKD at baseline (26). Several studies in other parts of the world have  
55  
56  
57  
58

1  
2  
3 reported a positive relationship between higher prevalence of stressors and CKD risk  
4  
5 (21, 22), although study findings have been inconsistent. Whereas some did not find  
6  
7 any associations among African Americans (26) others found associations in other  
8  
9 populations. Even among those who found some associations the directions differed  
10  
11 (22). Reasons for the lack of association observed in our study among migrants are  
12  
13 not fully understood but this lack of association may be a reflection of the real world.  
14  
15 First, migrants from Ghana practice both nuclear and extended family support system  
16  
17 as their peers living in rural and urban, this practice may mitigate the impact of  
18  
19 stressors such as unemployment, death of a love one, discrimination, etc. They also  
20  
21 belong to several religious organisations such as churches, which provide similar  
22  
23 support systems against stressors. Moreover, there are several associations of the  
24  
25 various ethnic groups (Akan, Ga and Ewe) providing such support when the need  
26  
27 arises. These systems provide both instrumental and/or emotional social support (56).  
28  
29 These assertions are supported by several studies. Specifically, these studies have  
30  
31 shown that social support positively affect outcomes through mechanisms such as  
32  
33 increased patient compliance with therapies, decreased levels of depressive affect,  
34  
35 direct physiologic effects on the immune system and improved perception of quality of  
36  
37 life (53, 54).  
38  
39  
40  
41  
42  
43  
44  
45  
46  
47

### 48 **Strength and limitation**

49  
50  
51 Our study is the first to use all four robust constructs of PS to determine association  
52  
53 between PS and CKD. This gave our study a more robust definition of PS compared  
54  
55 to other similar studies. The use of all three definitions of CKD per KDIGO guidelines  
56  
57  
58  
59

1  
2  
3 also provided a broader definition of CKD and allowed comparison between different  
4  
5 geographical regions. The use of a homogenous population of Ghanaians and  
6  
7 standardized protocols and diagnostic criteria in this study also provided a novel  
8  
9 opportunity to compare Ghanaians living in rural and urban Ghana and their  
10  
11 compatriots living in Europe. There are limitations to our study. First, the use of cross-  
12  
13 sectional design prevented us from determining the longitudinal effect of repeated  
14  
15 exposure to PS among the two populations. PS is captured and experienced in  
16  
17 different magnitude across different populations. We were unable to ascertain if PS as  
18  
19 defined in this study was adequately captured among Ghanaians living in rural and  
20  
21 urban Ghana.  
22  
23  
24  
25  
26  
27

## 28 **Conclusion**

29  
30  
31 Generally, our study shows no associations between stress as indicated by four PS  
32  
33 indicators and prevalence of CKD. Consequently, there is the need to explore other  
34  
35 factors that may be responsible for the observed differences in the prevalence of CKD  
36  
37 among Ghanaians living in rural and urban Ghana and their peers living in Europe.  
38  
39

## 40 **Acknowledgement**

41  
42 The authors are very grateful to the research assistants, interviewers and other staff of  
43  
44 the five research locations who took part in gathering the data and the Ghanaian  
45  
46 volunteers in all the participating RODAM sites. We gratefully acknowledge the  
47  
48 advisory board members for their valuable support in shaping the RODAM study  
49  
50 methods and the Academic Medical Centre Biobank for their support in biobank  
51  
52 management and high-quality storage of collected samples.  
53  
54  
55  
56  
57  
58  
59  
60

## Contributors

My co-authors have all contributed substantially to this manuscript and approve of this submission. Research idea and study design: DNA, CA, KS, DA, EB, KM, JA; data acquisition and curation: DNA, CA, EB, KM, data analysis/interpretation: DNA, CA, KS, DA, EB, KM, LS, JA, EOD, KKG, FPM, ID, JS, SB, ADA; statistical analysis: DNA, CA, KS. DNA, CA, KS, DA, EB, KM, LS, JA, EOD, KKG, FPM, ID, JS, SB, ADA contributed important intellectual content during manuscript drafting or revision and accepts accountability for the overall work by ensuring that questions pertaining to the accuracy or integrity of any portion of the work are appropriately investigated and resolved. DNA and CA takes responsibility that this study has been reported honestly, accurately, and transparently; that no important aspects of the study have been omitted; and that any discrepancies from the study as planned have been explained.

## Funding

This work was supported by the European Commission under the Framework Programme (Grant Number: 278901). The funders had no role in study design, data collection and analysis, decision to publish, or preparation of the manuscript. The

1  
2  
3 Wellcome Trust supported Professor Smeeth's contribution, grant number WT082178.  
4  
5

6 Professor Joachim Spranger was supported by the DZHK (German Center for  
7  
8 cardiovascular research) and the Berlin Institute of Health (BIH).  
9  
10  
11  
12

13 **Competing interest:** I have communicated with all my co-authors and obtained  
14 their full disclosures. My co-authors and I declare no conflicts of interest.  
15  
16

17  
18  
19 **Patient Consent:** None declared  
20  
21

22 **Ethics approval:** IRBs at each participating site.  
23  
24

25  
26 **Data sharing statement:** Data are available from the RODAM research cohort,  
27 a third party. Dr. Eric Beune affiliated with the RODAM research cohort and a  
28 co-author of this paper in accordance with the RODAM requirements for  
29 collaboration. Dr. Beune is the Data Collection Coordinator of RODAM and may  
30 be contacted with further questions (e.j.beune@amc.uva.nl). Additionally,  
31 researchers interested in further collaboration with RODAM may see the  
32 following URL: <http://www.rod-am.eu/>  
33  
34  
35  
36  
37  
38  
39  
40  
41  
42  
43  
44  
45  
46  
47  
48  
49  
50  
51  
52  
53  
54  
55  
56  
57  
58  
59  
60



1  
2  
3  
4  
5  
6  
7  
8  
9  
10  
11  
12  
13  
14  
15  
16  
17  
18  
19  
20  
21  
22  
23  
24  
25  
26  
27  
28  
29  
30  
31  
32  
33  
34  
35  
36  
37  
38  
39  
40  
41  
42  
43  
44  
45  
46  
47  
48  
49  
50  
51  
52  
53  
54  
55  
56  
57  
58  
59  
60

For peer review only

## References

1. Weisbord SD. Symptoms and their correlates in chronic kidney disease. *Adv Chronic Kidney Dis.* 2007;14(4):319-27.
2. Correa-Rotter R, Naicker S, Katz IJ, Agarwal SK, Valdes RH, Kaseje D, et al. Demographic and epidemiologic transition in the developing world: role of albuminuria in the early diagnosis and prevention of renal and cardiovascular disease. *Kidney Int.* 2004;66:S32-S7.
3. Lozano R, Naghavi M, Foreman K, Lim S, Shibuya K, Aboyans V, et al. Global and regional mortality from 235 causes of death for 20 age groups in 1990 and 2010: a systematic analysis for the Global Burden of Disease Study 2010. *The lancet.* 2012;380(9859):2095-128.

4. Katz IJ, Gerntholtz T, Naicker S. Africa and nephrology: the forgotten continent. *Nephron Clinical Practice*. 2011;117(4):320-7.
5. Bruce MA, Beech BM, Sims M, Brown TN, Wyatt SB, Taylor HA, et al. Social environmental stressors, psychological factors, and kidney disease. *J Investig Med*. 2009;57(4):583-9.
6. Osafo C, Mate-Kole M, Affram K, Adu D. Prevalence of chronic kidney disease in hypertensive patients in Ghana. *Ren Fail*. 2011;33(4):388-92.
7. Ojo A. Addressing the global burden of chronic kidney disease through clinical and translational research. *Trans Am Clin Climatol Assoc*. 2014;125:229.
8. Norris K, Nissenson AR. Race, gender, and socioeconomic disparities in CKD in the United States. *J Am Soc Nephrol*. 2008;19(7):1261-70.
9. Volkova N, McClellan W, Klein M, Flanders D, Kleinbaum D, Soucie JM, et al. Neighborhood poverty and racial differences in ESRD incidence. *J Am Soc Nephrol*. 2008;19(2):356-64.
10. Shoham DA, Vupputuri S, Roux AVD, Kaufman JS, Coresh J, Kshirsagar AV, et al. Kidney disease in life-course socioeconomic context: the Atherosclerosis Risk in Communities (ARIC) Study. *Am J Kidney Dis*. 2007;49(2):217-26.
11. Tarver-Carr ME, Powe NR, Eberhardt MS, LaVeist TA, Kington RS, Coresh J, et al. Excess risk of chronic kidney disease among African-American versus white subjects in the United States: a population-based study of potential explanatory factors. *J Am Soc Nephrol*. 2002;13(9):2363-70.
12. Adjei DN, Stronks K, Adu D, Beune E, Meeks K, Smeeth L, et al. Chronic kidney disease burden among African migrants in three European countries and in urban and rural Ghana: the RODAM cross-sectional study. *Nephrology Dialysis Transplantation*. 2018.
13. Adjei DN, Stronks K, Adu D, Snijder MB, Modesti PA, Peters RJ, et al. Relationship between educational and occupational levels, and Chronic Kidney Disease in a multi-ethnic sample-The HELIUS study. *PLoS One*. 2017;12(11):e0186460.
14. Fremont A, Bird CE. Social and psychological factors, physiological processes, and physical health. 2000.
15. Krantz DS, McCeney MK. Effects of psychological and social factors on organic disease: a critical assessment of research on coronary heart disease. *Annu Rev Psychol*. 2002;53(1):341-69.
16. Amerena J, Julius S. The role of the autonomic nervous system in hypertension. *Hypertens Res*. 1995;18(2):99-110.
17. Calhoun DA, Mutinga ML. Race, family history of hypertension, and sympathetic response to cold pressor testing. *Blood Press*. 1997;6(4):209-13.
18. Dibona GF. Neural control of the kidney: past, present, and future. *Hypertension*. 2003;41(3):621-4.
19. Auchincloss AH, Diez Roux AV, Brown DG, O'meara ES, Raghunathan TE. Association of insulin resistance with distance to wealthy areas: the multi-ethnic study of atherosclerosis. *Am J Epidemiol*. 2006;165(4):389-97.
20. Bruce MA, Sims M, Miller S, Elliott V, Ladipo M. One size fits all? Race, gender and body mass index among US adults. *J Natl Med Assoc*. 2007;99(10):1152.

21. Kim JW, Moon SJ, Kim HJ, Lee DG. Relationship between Chronic Kidney Disease and Depression in Elderly Koreans Using the 2013 Korea National Health and Nutrition Examination Survey Data. *Korean journal of family medicine*. 2017;38(3):156-62.
22. Loosman WL, Rottier MA, Honig A, Siegert CE. Association of depressive and anxiety symptoms with adverse events in Dutch chronic kidney disease patients: a prospective cohort study. *BMC Nephrol*. 2015;16(1):155.
23. Novak M, Mucsi I, Mendelssohn D. Screening for depression: only one piece of the puzzle. *Nephrology Dialysis Transplantation*. 2013;28(6):1336-40.
24. McKercher CM, Venn AJ, Blizzard L, Nelson MR, Palmer AJ, Ashby MA, et al. Psychosocial factors in adults with chronic kidney disease: characteristics of pilot participants in the Tasmanian Chronic Kidney Disease study. *BMC Nephrol*. 2013;14(1):83.
25. Cukor D, Fruchter Y, Ver Halen N, Naidoo S, Patel A, Saggi SJ. A preliminary investigation of depression and kidney functioning in patients with chronic kidney disease. *Nephron Clinical practice*. 2012;122(3-4):139-45.
26. Lunyera J, Davenport CA, Bhavsar NA, Sims M, Scialla J, Pendergast J, et al. Nondepressive Psychosocial Factors and CKD Outcomes in Black Americans. *Clin J Am Soc Nephrol*. 2018:CJN. 06430617.
27. Annor FB, Masyn KE, Okosun IS, Roblin DW, Goodman M. Psychosocial stress and changes in estimated glomerular filtration rate among adults with diabetes mellitus. *Kidney research and clinical practice*. 2015;34(3):146-53.
28. Gholson GK, Mwendwa DT, Wright RS, Callender CO, Campbell AL. The Combined Influence of Psychological Factors on Biomarkers of Renal Functioning in African Americans. *Ethn Dis*. 2015;25(2):117.
29. Kaur M, Kaur A, Saggi A, Kaur A, Kaur A, Arundee DK, et al. Comparative study on psychosocial stresses among urban and rural geriatric population in selected areas of district Ludhiana (Punjab), 2006. *Nursing and Midwifery Research*. 2007;3(2).
30. Agyemang C, Beune E, Meeks K, Owusu-Dabo E, Agyei-Baffour P, Aikins Ad-G, et al. Rationale and cross-sectional study design of the Research on Obesity and type 2 Diabetes among African Migrants: the RODAM study. *BMJ open*. 2015;4(3):e004877.
31. Agyemang C, Snijder MB, Adjei DN, van den Born B-JH, Modesti PA, Peters RJ, et al. Ethnic Disparities in CKD in the Netherlands: The Healthy Life in an Urban Setting (HELIUS) Study. *Am J Kidney Dis*. 2016;67(3):391-9.
32. Peek ME, Nunez-Smith M, Drum M, Lewis TT. Adapting the everyday discrimination scale to medical settings: reliability and validity testing in a sample of African American patients. *Ethn Dis*. 2011;21(4):502.
33. Pérez DJ, Fortuna L, Alegria M. Prevalence and correlates of everyday discrimination among US Latinos. *J Community Psychol*. 2008;36(4):421-33.
34. Ikram UZ, Snijder MB, Fassaert TJ, Schene AH, Kunst AE, Stronks K. The contribution of perceived ethnic discrimination to the prevalence of depression. *The European Journal of Public Health*. 2014;25(2):243-8.
35. Rosengren A, Hawken S, Ôunpuu S, Sliwa K, Zubaid M, Almahmeed WA, et al. Association of psychosocial risk factors with risk of acute myocardial infarction in 11 119 cases and 13 648 controls from 52 countries (the INTERHEART study): case-control study. *The Lancet*. 2004;364(9438):953-62.

- 1
  - 2
  - 3
  - 4
  - 5
  - 6
  - 7
  - 8
  - 9
  - 10
  - 11
  - 12
  - 13
  - 14
  - 15
  - 16
  - 17
  - 18
  - 19
  - 20
  - 21
  - 22
  - 23
  - 24
  - 25
  - 26
  - 27
  - 28
  - 29
  - 30
  - 31
  - 32
  - 33
  - 34
  - 35
  - 36
  - 37
  - 38
  - 39
  - 40
  - 41
  - 42
  - 43
  - 44
  - 45
  - 46
  - 47
  - 48
  - 49
  - 50
  - 51
  - 52
  - 53
  - 54
  - 55
  - 56
  - 57
  - 58
  - 59
  - 60
36. Rosmalen J, Bos E, De Jonge P. Validation of the Long-term Difficulties Inventory (LDI) and the List of Threatening Experiences (LTE) as measures of stress in epidemiological population-based cohort studies. *Psychol Med*. 2012;42(12):2599-608.
37. Brugha T, Bebbington P, Tennant C, Hurry J. The List of Threatening Experiences: a subset of 12 life event categories with considerable long-term contextual threat. *Psychol Med*. 1985;15(1):189-94.
38. Kroenke K, Spitzer RL, Williams JB. The phq-9. *J Gen Intern Med*. 2001;16(9):606-13.
39. Association AD. Standards of Medical Care in Diabetes—2014. *Diabetes Care* 2014; 37 (Suppl. 1): S14–S80. Diagnosis and Classification of Diabetes Mellitus. *Diabetes Care* 2014; 37 (Suppl. 1): S81–S90. *Diabetes Care*. 2014;37(3):887-.
40. Stevens LA, Schmid CH, Greene T, Zhang YL, Beck GJ, Froissart M, et al. Comparative performance of the CKD Epidemiology Collaboration (CKD-EPI) and the Modification of Diet in Renal Disease (MDRD) Study equations for estimating GFR levels above 60 mL/min/1.73 m<sup>2</sup>. *Am J Kidney Dis*. 2010;56(3):486-95.
41. Kellum JA, Lameire N, Aspelin P, Barsoum RS, Burdmann EA, Goldstein SL, et al. Kidney disease: improving global outcomes (KDIGO) acute kidney injury work group. KDIGO clinical practice guideline for acute kidney injury. *Kidney international supplements*. 2012;2(1):1-138.
42. KDIGO G. Work Group. KDIGO clinical practice guideline for glomerulonephritis. *Kidney inter, Suppl*. 2012;2:139-274.
43. Rivera B, Casal B, Currais L. Length of stay and mental health of the immigrant population in Spain: Evidence of the healthy immigrant effect. *Applied Economics*. 2015;47(19):1972-82.
44. Collins AJ, Foley RN, Herzog C, Chavers B, Gilbertson D, Ishani A, et al. US Renal Data System 2010 Annual Data Report. *American journal of kidney diseases: the official journal of the National Kidney Foundation*. 2011;57(1 Suppl 1):A8, e1.
45. Fox CS, Larson MG, Leip EP, Culleton B, Wilson PW, Levy D. Predictors of new-onset kidney disease in a community-based population. *JAMA*. 2004;291(7):844-50.
46. Banks J, Marmot M, Oldfield Z, Smith JP. Disease and disadvantage in the United States and in England. *JAMA*. 2006;295(17):2037-45.
47. Levin A, Stevens L, McCullough PA. Cardiovascular disease and the kidney: Tracking a killer in chronic kidney disease. *Postgrad Med*. 2002;111(4):53-60.
48. Tsai Y-C, Chiu Y-W, Hung C-C, Hwang S-J, Tsai J-C, Wang S-L, et al. Association of symptoms of depression with progression of CKD. *Am J Kidney Dis*. 2012;60(1):54-61.
49. Bruce MA, Griffith DM, Thorpe RJ. Stress and the kidney. *Adv Chronic Kidney Dis*. 2015;22(1):46-53.
50. Brummett BH, Barefoot JC, Siegler IC, Clapp-Channing NE, Lytle BL, Bosworth HB, et al. Characteristics of socially isolated patients with coronary artery disease who are at elevated risk for mortality. *Psychosom Med*. 2001;63(2):267-72.
51. Eng PM, Rimm EB, Fitzmaurice G, Kawachi I. Social ties and change in social ties in relation to subsequent total and cause-specific mortality and coronary heart disease incidence in men. *Am J Epidemiol*. 2002;155(8):700-9.
52. Patel SS, Peterson RA, Kimmel PL, editors. Psychosocial factors in patients with chronic kidney disease: The impact of social support on end-stage renal disease. *Seminars in dialysis*; 2005: Wiley Online Library.

- 1  
2  
3 53. Cohen SD, Sharma T, Acquaviva K, Peterson RA, Patel SS, Kimmel PL. Social support and  
4 chronic kidney disease: an update. *Adv Chronic Kidney Dis.* 2007;14(4):335-44.  
5  
6 54. Uchino BN, Cacioppo JT, Kiecolt-Glaser JK. The relationship between social support and  
7 physiological processes: a review with emphasis on underlying mechanisms and implications for  
8 health. *Psychol Bull.* 1996;119(3):488.  
9  
10 55. Tsurugano S, Nakao M, Takeuchi T, Nomura K, Yano E. Job stress strengthens the link  
11 between metabolic risk factors and renal dysfunction in adult men. *The Tohoku journal of*  
12 *experimental medicine.* 2012;226(2):101-8.  
13  
14 56. Tróccol BT. Desenvolvimento de escala para avaliação do suporte social em HIV/aids.  
15 *Psicologia: Teoria e Pesquisa.* 2006;22(3):317-26.  
16  
17  
18  
19  
20  
21  
22  
23  
24  
25  
26  
27  
28  
29  
30  
31  
32  
33  
34  
35  
36  
37  
38  
39  
40  
41  
42  
43  
44  
45  
46  
47  
48  
49  
50  
51  
52  
53  
54  
55

56 **Legend for figures**  
57  
58  
59  
60

1  
2  
3  
4  
5 **Figure 1:** Prevalence of CKD risk among Ghanaians who have experienced negative life events  
6 and those who have not experienced any negative life events stratified by site. Definition per  
7 2012 KDIGO (Kidney Disease: Improving Global Outcomes) guidelines.  
8  
9

10 **Figure 2:** Prevalence of CKD risk among Ghanaians who have experienced discrimination and  
11 those who have not experienced any discrimination stratified by site. Definitions per 2012  
12 KDIGO (Kidney Disease: Improving Global Outcomes) guidelines.  
13  
14

15 **Figure 3:** Prevalence of CKD risk among Ghanaians who have experienced stress at  
16 home/work and those who have not experienced any stress at home/work in the past 12  
17 months stratified by site. Definitions per 2012 KDIGO (Kidney Disease: Improving Global  
18 Outcomes) guidelines.  
19  
20  
21

22 **Figure 4:** Prevalence of CKD risk among Ghanaians who have depressive symptoms and those  
23 who do not have depressive symptoms stratified by site. Definitions per 2012 KDIGO (Kidney  
24 Disease: Improving Global Outcomes) guidelines.  
25  
26  
27  
28  
29  
30  
31  
32  
33  
34  
35  
36  
37  
38  
39  
40  
41  
42  
43  
44  
45  
46  
47  
48  
49  
50  
51  
52  
53  
54  
55  
56  
57  
58  
59  
60

1  
2  
3  
4  
5  
6  
7  
8  
9  
10  
11  
12  
13  
14  
15  
16  
17  
18  
19  
20  
21  
22  
23  
24  
25  
26  
27  
28  
29  
30  
31  
32  
33  
34  
35  
36  
37  
38  
39  
40  
41  
42  
43  
44  
45  
46  
47  
48  
49  
50  
51  
52  
53  
54  
55  
56  
57  
58  
59  
60

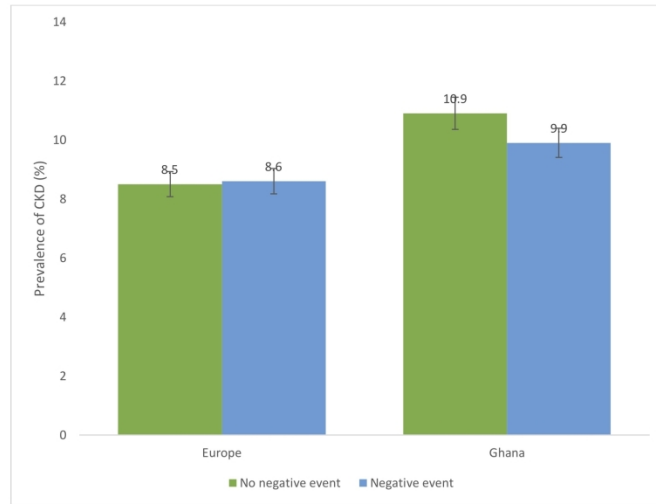

**Figure 1:** Prevalence of CKD risk among Ghanaians who have experienced negative life events and those who have not experienced any negative life events stratified by site. Definition per 2012 KDIGO (Kidney Disease: Improving Global Outcomes) guidelines.

Figure 1: Prevalence of CKD risk among Ghanaians who have experienced negative life events and those who have not experienced any negative life events stratified by site. Definition per 2012 KDIGO (Kidney Disease: Improving Global Outcomes) guidelines.

215x279mm (300 x 300 DPI)

1  
2  
3  
4  
5  
6  
7  
8  
9  
10  
11  
12  
13  
14  
15  
16  
17  
18  
19  
20  
21  
22  
23  
24  
25  
26  
27  
28  
29  
30  
31  
32  
33  
34  
35  
36  
37  
38  
39  
40  
41  
42  
43  
44  
45  
46  
47  
48  
49  
50  
51  
52  
53  
54  
55  
56  
57  
58  
59  
60

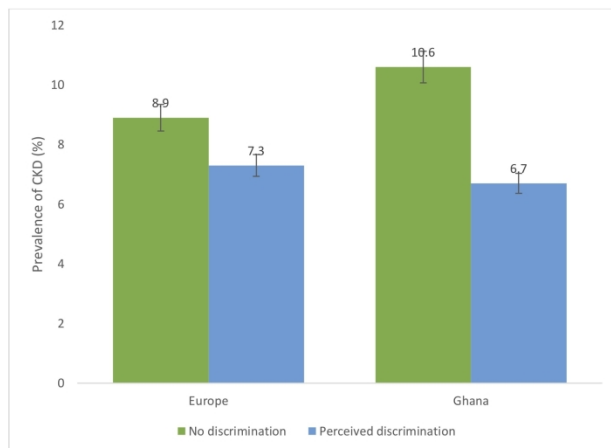

**Figure 2:** Prevalence of CKD risk among Ghanaians who have experienced discrimination and those who have not experienced any discrimination stratified by site. Definitions per 2012 KDIGO (Kidney Disease: Improving Global Outcomes) guidelines.

Figure 2: Prevalence of CKD risk among Ghanaians who have experienced discrimination and those who have not experienced any discrimination stratified by site. Definitions per 2012 KDIGO (Kidney Disease: Improving Global Outcomes) guidelines.

215x279mm (300 x 300 DPI)



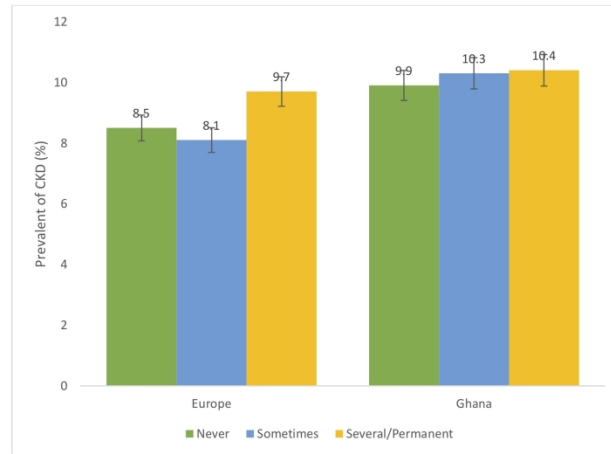

**Figure 3:** Prevalence of CKD risk among Ghanaians who have experienced stress at home/work and those who have not experienced any stress at home/work in the past 12 months stratified by site. Definitions per 2012 KDIGO (Kidney Disease: Improving Global Outcomes) guidelines.

Figure 3: Prevalence of CKD risk among Ghanaians who have experienced stress at home/work and those who have not experienced any stress at home/work in the past 12 months stratified by site. Definitions per 2012 KDIGO (Kidney Disease: Improving Global Outcomes) guidelines.

215x279mm (300 x 300 DPI)

1  
2  
3  
4  
5  
6  
7  
8  
9  
10  
11  
12  
13  
14  
15  
16  
17  
18  
19  
20  
21  
22  
23  
24  
25  
26  
27  
28  
29  
30  
31  
32  
33  
34  
35  
36  
37  
38  
39  
40  
41  
42  
43  
44  
45  
46  
47  
48  
49  
50  
51  
52  
53  
54  
55  
56  
57  
58  
59  
60

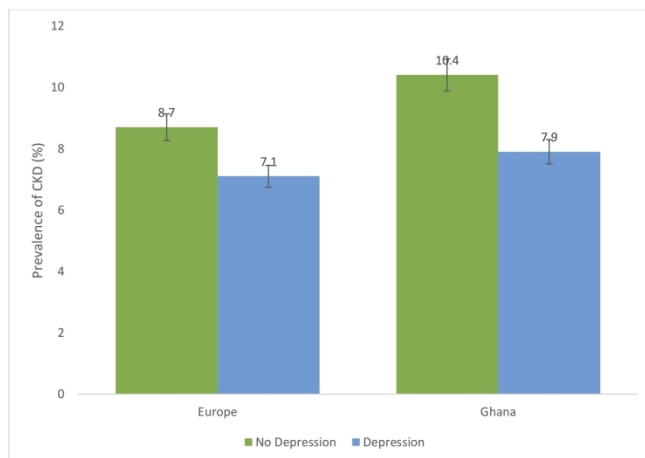

**Figure 4:** Prevalence of CKD risk among Ghanaians who have depressive symptoms and those who do not have depressive symptoms stratified by site. Definitions per 2012 KDIGO (Kidney Disease: Improving Global Outcomes) guidelines.

Figure 4: Prevalence of CKD risk among Ghanaians who have depressive symptoms and those who do not have depressive symptoms stratified by site. Definitions per 2012 KDIGO (Kidney Disease: Improving Global Outcomes) guidelines

215x279mm (300 x 300 DPI)

## Supplementary Tables

**S1: Association of psychosocial stressors (PS) indicators (negative life events, discrimination, stress at work/home and depression) with albuminuria, reduced eGFR and CKD risk for Ghanaians living in Ghana and those living in Europe**

|                            | Albuminuria (ACR $\geq$ 3 mg/mmol) |                        | eGFR < 60 mL/min/1.73 m <sup>2</sup> |                        | High to very high CKD risk (KDIGO, 2012) |                        |
|----------------------------|------------------------------------|------------------------|--------------------------------------|------------------------|------------------------------------------|------------------------|
|                            | n (%)                              | OR (95% CI)<br>Model 3 | n (%)                                | OR (95% CI)<br>Model 3 | n cases (%)                              | OR (95% CI)<br>Model 3 |
| <b>Negative events</b>     |                                    |                        |                                      |                        |                                          |                        |
| <b>Europe</b>              |                                    |                        |                                      |                        |                                          |                        |
| No                         | 1128 (8.2)                         | 1.00 (Reference)       | 1106 (2.6)                           | 1.00 (Reference)       | 1090 (8.5)                               | 1.00 (Reference)       |
| Yes                        | 1615 (8.4)                         | 0.95 (0.70-1.30)       | 1587 (2.5)                           | 0.77 (0.44-1.37)       | 1557 (8.6)                               | 0.92 (0.67-1.26)       |
| <b>Ghana</b>               |                                    |                        |                                      |                        |                                          |                        |
| No                         | 732 (10.4)                         | 1.00 (Reference)       | 736 (4.5)                            | 1.00 (Reference)       | 732 (10.9)                               | 1.00 (Reference)       |
| Yes                        | 1595 (9.2)                         | 0.79 (0.58-1.07)       | 1601 (3.4)                           | 0.69 (0.43-1.09)       | 1590 (9.9)                               | 0.79 (0.58-1.06)       |
| <b>Discrimination</b>      |                                    |                        |                                      |                        |                                          |                        |
| <b>Europe</b>              |                                    |                        |                                      |                        |                                          |                        |
| No                         | 1899 (8.5)                         | 1.00 (Reference)       | 1867 (2.6)                           | 1.00 (Reference)       | 1832 (8.9)                               | 1.00 (Reference)       |
| Yes                        | 810 (7.4)                          | 0.87 (0.61-1.21)       | 791 (2.2)                            | 0.87 (0.45-1.65)       | 782 (7.3)                                | 0.79 (0.55-1.12)       |
| <b>Ghana</b>               |                                    |                        |                                      |                        |                                          |                        |
| No                         | 2034 (10.0)                        | 1.00 (Reference)       | 2047 (3.9)                           | 1.00 (Reference)       | 2031 (10.6)                              | 1.00 (Reference)       |
| Yes                        | 104 (7.7)                          | 0.92 (0.43-1.98)       | 104 (1.9)                            | 0.65 (0.15-2.79)       | 104 (6.7)                                | 0.74 (0.33-1.66)       |
| <b>Stress at home/work</b> |                                    |                        |                                      |                        |                                          |                        |
| <b>Europe</b>              |                                    |                        |                                      |                        |                                          |                        |
| Never                      | 1330 (8.2)                         | 1.00 (Reference)       | 1305 (3.4)                           | 1.00 (Reference)       | 1282 (8.5)                               | 1.00 (Reference)       |
| Some stress                | 1002 (7.9)                         | 1.01 (0.72-1.41)       | 984 (1.4)                            | 0.51 (0.25-1.04)       | 968 (8.1)                                | 1.01 (0.72-1.42)       |
| Several/Permanent stresses | 397 (9.1)                          | 1.00 (0.64-1.59)       | 390 (2.3)                            | 0.91 (0.40-2.03)       | 383 (9.7)                                | 1.15 (0.74-1.79)       |

**Ghana**

|                            |            |                  |            |                  |             |                  |
|----------------------------|------------|------------------|------------|------------------|-------------|------------------|
| Never                      | 682 (10.3) | 1.00 (Reference) | 688 (3.3)  | 1.00 (Reference) | 682 (9.9)   | 1.00 (Reference) |
| Some stress                | 1279 (9.5) | 0.78 (0.56-1.09) | 1279 (3.9) | 1.14 (0.67-1.93) | 1274 (10.3) | 0.93 (0.67-1.29) |
| Several/Permanent stresses | 365 (8.5)  | 0.70 (0.43-1.13) | 369 (4.1)  | 1.32 (0.65-1.68) | 365 (10.4)  | 0.97 (0.62-1.52) |

**Depressive symptoms****Europe**

|     |            |                  |            |                  |            |                  |
|-----|------------|------------------|------------|------------------|------------|------------------|
| No  | 2505 (8.5) | 1.00 (Reference) | 2457 (2.7) | 1.00 (Reference) | 2416 (8.7) | 1.00 (Reference) |
| Yes | 206 (6.3)  | 0.65 (0.33-1.28) | 202 (1.5)  | 0.94 (0.28-3.14) | 199 (7.1)  | 0.78 (0.41-1.47) |

**Ghana**

|     |            |                  |            |                  |             |                  |
|-----|------------|------------------|------------|------------------|-------------|------------------|
| No  | 2212 (9.9) | 1.00 (Reference) | 2222 (3.8) | 1.00 (Reference) | 2207 (10.4) | 1.00 (Reference) |
| Yes | 114 (5.3)  | 0.41 (0.16-1.04) | 114 (2.6)  | 0.58 (0.17-1.95) | 114 (7.9)   | 0.62 (0.28-1.31) |

Model 3, adjusted for age, sex educational level, hypertension, diabetes, hypercholesterolemia, BMI, physical activity and smoking; Abbreviations: CI, confidence interval; ACR, albumin creatinine ratio; eGFR, estimated glomerular filtration rate; CKD, chronic kidney disease; OR, odds ratio, n= total number of Ghanaians living in Ghana and Europe among the various levels of PS constructs; %, proportion of individuals with CKD among the various levels of PS constructs in Ghana and Europe.

**S2: Association of psychosocial stressors (PS) indicators (negative life events, discrimination, stress at work/home and depression) with albuminuria, reduced eGFR and CKD risk for Ghanaians living in Ghana and those living in Europe stratified by obesity status**

|                         | Albuminuria (ACR ≥ 3 mg/mmol) |                  |                  | eGFR < 60 mL/min/1.73 m <sup>2</sup> |                  |                  | High to very high CKD risk (KDIGO, 2012) |                         |                         |
|-------------------------|-------------------------------|------------------|------------------|--------------------------------------|------------------|------------------|------------------------------------------|-------------------------|-------------------------|
|                         | n (%)                         | OR (95% CI)      | Model 2          | n (%)                                | OR (95% CI)      | Model 2          | n cases (%)                              | OR (95% CI)             | Model 2                 |
| <b>Negative events</b>  |                               |                  |                  |                                      |                  |                  |                                          |                         |                         |
| <b>Europe/Not obese</b> |                               |                  |                  |                                      |                  |                  |                                          |                         |                         |
| No                      | 736 (7.4)                     | 1.00 (Reference) | 1.00 (Reference) | 729 (2.5)                            | 1.00 (Reference) | 1.00 (Reference) | 719 (8.5)                                | 1.00 (Reference)        | 1.00 (Reference)        |
| Yes                     | 1003 (7.7)                    | 0.98 (0.67-1.40) | 0.99 (0.69-1.43) | 992 (2.0)                            | 0.77 (0.40-1.48) | 0.71 (0.36-1.42) | 971 (7.9)                                | 0.91 (0.64-1.29)        | 0.89 (0.62-1.29)        |
| <b>Europe/Obese</b>     |                               |                  |                  |                                      |                  |                  |                                          |                         |                         |
| No                      | 390 (9.2)                     | 1.00 (Reference) | 1.00 (Reference) | 375 (2.9)                            | 1.00 (Reference) | 1.00 (Reference) | 369 (8.7)                                | 1.00 (Reference)        | 1.00 (Reference)        |
| Yes                     | 607 (9.6)                     | 1.05 (0.67-1.63) | 1.14 (0.72-1.82) | 590 (3.2)                            | 0.97 (0.44-2.11) | 1.01 (0.44-2.26) | 581 (9.6)                                | 1.15 (0.73-1.82)        | 1.15 (0.71-1.85)        |
| <b>Ghana/Not obese</b>  |                               |                  |                  |                                      |                  |                  |                                          |                         |                         |
| No                      | 588 (9.5)                     | 1.00 (Reference) | 1.00 (Reference) | 592 (4.7)                            | 1.00 (Reference) | 1.00 (Reference) | 588 (10.0)                               | 1.00 (Reference)        | 1.00 (Reference)        |
| Yes                     | 1324 (8.5)                    | 0.86 (0.61-1.21) | 0.83 (0.59-1.17) | 1331 (3.4)                           | 0.64 (0.39-1.05) | 0.65 (0.39-1.83) | 1321 (9.0)                               | 0.86 (0.61-1.20)        | 0.84 (0.60-1.18)        |
| <b>Ghana/Obese</b>      |                               |                  |                  |                                      |                  |                  |                                          |                         |                         |
| No                      | 144 (13.9)                    | 1.00 (Reference) | 1.00 (Reference) | 144 (3.5)                            | 1.00 (Reference) | 1.00 (Reference) | 144 (14.6)                               | 1.00 (Reference)        | 1.00 (Reference)        |
| Yes                     | 268 (13.1)                    | 0.91 (0.50-1.64) | 0.91 (0.49-1.65) | 267 (3.8)                            | 1.04 (0.34-3.16) | 1.09 (0.35-3.37) | 266 (14.3)                               | 0.94 (0.52-1.68)        | 0.94 (0.52-1.67)        |
| <b>Discrimination</b>   |                               |                  |                  |                                      |                  |                  |                                          |                         |                         |
| <b>Europe/Not obese</b> |                               |                  |                  |                                      |                  |                  |                                          |                         |                         |
| No                      | 1186 (8.4)                    | 1.00 (Reference) | 1.00 (Reference) | 1172 (2.4)                           | 1.00 (Reference) | 1.00 (Reference) | 1150 (9.4)                               | 1.00 (Reference)        | 1.00 (Reference)        |
| Yes                     | 538 (5.9)                     | 0.69 (0.46-1.05) | 0.71 (0.46-1.11) | 532 (1.5)                            | 0.62 (0.28-1.37) | 0.57 (0.24-1.34) | 525 (5.9)                                | <b>0.63 (0.42-0.96)</b> | <b>0.63 (0.41-0.97)</b> |
| <b>Europe/Obese</b>     |                               |                  |                  |                                      |                  |                  |                                          |                         |                         |
| No                      | 709 (8.7)                     | 1.00 (Reference) | 1.00 (Reference) | 691 (3.0)                            | 1.00 (Reference) | 1.00 (Reference) | 678 (8.9)                                | 1.00 (Reference)        | 1.00 (Reference)        |
| Yes                     | 269 (10.0)                    | 1.14 (0.71-1.85) | 1.29 (0.78-2.12) | 256 (3.5)                            | 1.15 (0.50-2.63) | 1.27 (0.54-2.99) | 254 (9.8)                                | 1.13 (0.69-1.86)        | 1.22 (0.73-2.13)        |
| <b>Ghana/Not obese</b>  |                               |                  |                  |                                      |                  |                  |                                          |                         |                         |
| No                      | 1648 (9.1)                    | 1.00 (Reference) | 1.00 (Reference) | 1661 (3.9)                           | 1.00 (Reference) | 1.00 (Reference) | 1646 (9.6)                               | 1.00 (Reference)        | 1.00 (Reference)        |
| Yes                     | 81 (8.6)                      | 1.06 (0.48-2.38) | 1.04 (0.47-2.32) | 81 (2.5)                             | 1.04 (0.48-2.32) | 0.86 (0.20-3.69) | 81 (7.4)                                 | 0.90 (0.38-2.12)        | 0.89 (0.38-2.11)        |

|    |                            |            |                  |                  |            |                  |                  |            |                  |                  |
|----|----------------------------|------------|------------------|------------------|------------|------------------|------------------|------------|------------------|------------------|
| 1  |                            |            |                  |                  |            |                  |                  |            |                  |                  |
| 2  |                            |            |                  |                  |            |                  |                  |            |                  |                  |
| 3  |                            |            |                  |                  |            |                  |                  |            |                  |                  |
| 4  | <b>Ghana/Obese</b>         |            |                  |                  |            |                  |                  |            |                  |                  |
| 5  | No                         | 383 (13.8) | 1.00 (Reference) | 1.00 (Reference) | 383 (3.7)  | 1.00 (Reference) | 1.00 (Reference) | 382 (14.9) | 1.00 (Reference) | 1.00 (Reference) |
| 6  | Yes                        | 23 (4.4)   | 0.31 (0.04-2.36) | 0.40 (0.05-3.11) | 23 (0.0)   | **** (***_***)   | **** (***_***)   | 23 (4.4)   | 0.29 (0.04-2.22) | 0.34 (0.04-2.66) |
| 7  |                            |            |                  |                  |            |                  |                  |            |                  |                  |
| 8  | <b>Stress at home/work</b> |            |                  |                  |            |                  |                  |            |                  |                  |
| 9  |                            |            |                  |                  |            |                  |                  |            |                  |                  |
| 10 | <b>Europe/Not obese</b>    |            |                  |                  |            |                  |                  |            |                  |                  |
| 11 | Never                      | 855 (7.4)  | 1.00 (Reference) | 1.00 (Reference) | 847 (3.4)  | 1.00 (Reference) | 1.00 (Reference) | 831 (8.2)  | 1.00 (Reference) | 1.00 (Reference) |
| 12 | Some stress                | 629 (8.3)  | 1.16 (0.79-1.70) | 1.20 (0.81-1.79) | 627 (1.4)  | 0.52 (0.24-1.12) | 0.47 (0.21-1.07) | 615 (7.9)  | 0.98 (0.66-1.43) | 0.98 (0.65-1.46) |
| 13 | Several/Permanent stresses | 247 (6.9)  | 0.93 (0.53-1.62) | 1.15 (0.77-1.72) | 239 (2.3)  | 0.45 (0.13-1.52) | 0.49 (0.15-1.67) | 236 (9.1)  | 0.97 (0.57-1.65) | 1.04 (0.61-1.78) |
| 14 |                            |            |                  |                  |            |                  |                  |            |                  |                  |
| 15 | <b>Europe/Obese</b>        |            |                  |                  |            |                  |                  |            |                  |                  |
| 16 | Never                      | 472 (9.8)  | 1.00 (Reference) | 1.00 (Reference) | 455 (3.9)  | 1.00 (Reference) | 1.00 (Reference) | 448 (10.3) | 1.00 (Reference) | 1.00 (Reference) |
| 17 | Some stress                | 372 (7.5)  | 0.72 (0.44-1.18) | 0.79 (0.47-1.32) | 356 (1.4)  | 0.41 (0.15-1.16) | 0.43 (0.15-1.21) | 352 (9.5)  | 0.94 (0.57-1.53) | 1.05 (0.62-1.76) |
| 18 | Several/Permanent stresses | 147 (12.2) | 1.32 (0.74-2.38) | 1.31 (0.72-2.42) | 148 (4.1)  | 1.05 (0.40-2.79) | 1.09 (0.40-2.91) | 144 (8.5)  | 1.36 (0.74-2.49) | 1.41 (0.75-2.64) |
| 19 |                            |            |                  |                  |            |                  |                  |            |                  |                  |
| 20 |                            |            |                  |                  |            |                  |                  |            |                  |                  |
| 21 | <b>Ghana/Not obese</b>     |            |                  |                  |            |                  |                  |            |                  |                  |
| 22 | Never                      | 537 (9.7)  | 1.00 (Reference) | 1.00 (Reference) | 542 (3.1)  | 1.00 (Reference) | 1.00 (Reference) | 537 (8.9)  | 1.00 (Reference) | 1.00 (Reference) |
| 23 | Some stress                | 1055 (8.3) | 0.79 (0.56-1.15) | 0.74 (0.52-1.07) | 1057 (3.9) | 1.16 (0.65-2.09) | 1.21 (0.67-2.18) | 1052 (9.0) | 0.92 (0.64-1.35) | 0.90 (0.62-1.32) |
| 24 | Several/permanent stresses | 319 (8.5)  | 0.81 (0.49-1.32) | 0.73 (0.44-1.20) | 323 (4.3)  | 1.34 (0.64-2.83) | 1.43 (0.67-3.04) | 319 (10.7) | 1.12 (0.69-1.79) | 1.09 (0.68-1.76) |
| 25 |                            |            |                  |                  |            |                  |                  |            |                  |                  |
| 26 |                            |            |                  |                  |            |                  |                  |            |                  |                  |
| 27 | <b>Ghana/Obese</b>         |            |                  |                  |            |                  |                  |            |                  |                  |
| 28 | Never                      | 145 (12.4) | 1.00 (Reference) | 1.00 (Reference) | 146 (4.1)  | 1.00 (Reference) | 1.00 (Reference) | 145 (13.8) | 1.00 (Reference) | 1.00 (Reference) |
| 29 | Some stress                | 221 (14.9) | 1.21 (0.64-2.26) | 1.05 (0.55-1.99) | 219 (3.7)  | 0.74 (0.25-2.22) | 0.83 (0.26-2.06) | 219 (15.9) | 1.13 (0.62-2.07) | 1.02 (0.55-1.89) |
| 30 | Several/Permanent stresses | 46 (8.7)   | 0.64 (0.20-2.01) | 0.52 (0.16-1.65) | 46 (2.2)   | 0.41 (0.05-3.61) | 0.45 (0.05-4.01) | 46 (8.8)   | 0.55 (0.17-1.71) | 0.47 (0.14-1.50) |
| 31 |                            |            |                  |                  |            |                  |                  |            |                  |                  |
| 32 |                            |            |                  |                  |            |                  |                  |            |                  |                  |
| 33 | <b>Depressive symptoms</b> |            |                  |                  |            |                  |                  |            |                  |                  |
| 34 |                            |            |                  |                  |            |                  |                  |            |                  |                  |
| 35 | <b>Europe/Not obese</b>    |            |                  |                  |            |                  |                  |            |                  |                  |
| 36 | No                         | 1601 (7.9) | 1.00 (Reference) | 1.00 (Reference) | 1586 (2.2) | 1.00 (Reference) | 1.00 (Reference) | 1558 (8.3) | 1.00 (Reference) | 1.00 (Reference) |
| 37 | Yes                        | 121 (4.9)  | 0.59 (0.25-1.36) | 0.65 (0.27-1.48) | 117 (1.7)  | 0.79 (0.18-2.35) | 0.86 (0.21-3.80) | 115 (5.22) | 0.58 (0.25-1.35) | 0.64 (0.27-1.49) |
| 38 |                            |            |                  |                  |            |                  |                  |            |                  |                  |
| 39 | <b>Europe/Obese</b>        |            |                  |                  |            |                  |                  |            |                  |                  |
| 40 | No                         | 899 (9.7)  | 1.00 (Reference) | 1.00 (Reference) | 866 (3.4)  | 1.00 (Reference) | 1.00 (Reference) | 853 (9.4)  | 1.00 (Reference) | 1.00 (Reference) |
| 41 |                            |            |                  |                  |            |                  |                  |            |                  |                  |
| 42 |                            |            |                  |                  |            |                  |                  |            |                  |                  |
| 43 |                            |            |                  |                  |            |                  |                  |            |                  |                  |
| 44 |                            |            |                  |                  |            |                  |                  |            |                  |                  |
| 45 |                            |            |                  |                  |            |                  |                  |            |                  |                  |
| 46 |                            |            |                  |                  |            |                  |                  |            |                  |                  |
| 47 |                            |            |                  |                  |            |                  |                  |            |                  |                  |

1  
2  
3  
4  
5  
6  
7  
8  
9  
10  
11  
12  
13  
14  
15  
16  
17  
18  
19  
20  
21  
22  
23  
24  
25  
26  
27  
28  
29  
30  
31  
32  
33  
34  
35  
36  
37  
38  
39  
40  
41  
42  
43  
44  
45  
46  
47

|                        |            |                  |                  |            |                   |                  |            |                  |                  |
|------------------------|------------|------------------|------------------|------------|-------------------|------------------|------------|------------------|------------------|
| Yes                    | 83 (7.2)   | 0.71 (0.29-1.67) | 0.72 (0.30-1.74) | 83 (1.2)   | 0.46 (0.06-3.52)  | 0.46 (0.06-3.57) | 82 (8.5)   | 0.89 (0.40-2.01) | 0.90 (0.40-2.04) |
| <b>Ghana/Not obese</b> |            |                  |                  |            |                   |                  |            |                  |                  |
| No                     | 1811 (8.9) | 1.00 (Reference) | 1.00 (Reference) | 1822 (3.9) | 1.00 (Reference)  | 1.00 (Reference) | 1808 (9.4) | 1.00 (Reference) | 1.00 (Reference) |
| Yes                    | 100 (6.0)  | 0.57 (0.24-1.33) | 0.56 (0.24-1.32) | 100 (2.0)  | 0.38 (0.09-1.63)  | 0.38 (0.09-1.63) | 100 (8.0)  | 0.69 (0.32-1.46) | 0.69 (0.32-1.47) |
| <b>Ghana/Obese</b>     |            |                  |                  |            |                   |                  |            |                  |                  |
| No                     | 398 (13.8) | 1.00 (Reference) | 1.00 (Reference) | 397 (3.5)  | 1.00 (Reference)  | 1.00 (Reference) | 396 (14.7) | 1.00 (Reference) | 1.00 (Reference) |
| Yes                    | 14 (0.0)   | *** (****_****)  | *** (****_****)  | 14 (7.1)   | 1.76 (0.21-14.89) | 2.14 (0.25-8.78) | 14 (7.1)   | 0.42 (0.05-3.32) | 0.38 (0.05-3.07) |

Model 1, adjusted for age and sex; Model 2, adjusted for age, sex, and educational level for Ghanaians (SSA) and length of stay for those in Europe; Abbreviations: CI, confidence interval; ACR, albumin creatinine ration; eGFR, estimated glomerular filtration rate; CKD, chronic kidney disease; OR, odds ratio, n= total number of Ghanaians living in Ghana and Europe among the various levels of PS constructs; %, proportion of individuals with CKD among the various levels of PS constructs in Ghana and Europe.

Peer review only

**S3: Association of psychosocial stressors (PS) indicators (negative life events, discrimination, stress at work/home and depression) with albuminuria, reduced eGFR and CKD risk for Ghanaians living in Ghana and those living in Europe stratified by diabetes status**

|                           | Albuminuria (ACR $\geq$ 3 mg/mmol) |                  |                  | eGFR < 60 mL/min/1.73 m <sup>2</sup> |                  |                   | High to very high CKD risk (KDIGO, 2012) |                  |                  |
|---------------------------|------------------------------------|------------------|------------------|--------------------------------------|------------------|-------------------|------------------------------------------|------------------|------------------|
|                           | n (%)                              | OR (95% CI)      | Model 2          | n (%)                                | OR (95% CI)      | Model 2           | n cases (%)                              | OR (95% CI)      | Model 2          |
| <b>Negative events</b>    |                                    |                  |                  |                                      |                  |                   |                                          |                  |                  |
| <b>Europe/No diabetes</b> |                                    |                  |                  |                                      |                  |                   |                                          |                  |                  |
| No                        | 986 (8.0)                          | 1.00 (Reference) | 1.00 (Reference) | 971 (2.1)                            | 1.00 (Reference) | 1.00 (Reference)  | 957 (7.9)                                | 1.00 (Reference) | 1.00 (Reference) |
| Yes                       | 1359 (7.7)                         | 0.95 (0.70-1.29) | 0.97 (0.71-1.34) | 1340 (2.0)                           | 0.90 (0.50-1.63) | 0.90 (0.48-1.68)  | 1315 (8.1)                               | 1.01 (0.75-1.37) | 0.99 (0.72-1.36) |
| <b>Europe/Diabetes</b>    |                                    |                  |                  |                                      |                  |                   |                                          |                  |                  |
| No                        | 142 (9.9)                          | 1.00 (Reference) | 1.00 (Reference) | 135 (6.7)                            | 1.00 (Reference) | 1.00 (Reference)  | 133 (12.8)                               | 1.00 (Reference) | 1.00 (Reference) |
| Yes                       | 256 (12.5)                         | 1.28 (0.66-2.50) | 1.41 (0.71-2.82) | 247 (4.9)                            | 0.75 (0.29-1.89) | 10.68 (0.27-1.77) | 242 (11.2)                               | 0.87 (0.46-1.69) | 0.96 (0.49-1.88) |
| <b>Ghana/No diabetes</b>  |                                    |                  |                  |                                      |                  |                   |                                          |                  |                  |
| No                        | 683 (9.1)                          | 1.00 (Reference) | 1.00 (Reference) | 687 (4.1)                            | 1.00 (Reference) | 1.00 (Reference)  | 683 (9.8)                                | 1.00 (Reference) | 1.00 (Reference) |
| Yes                       | 1447 (7.7)                         | 0.84 (0.60-1.16) | 0.82 (0.59-1.14) | 1451 (3.1)                           | 0.69 (0.42-1.13) | 0.69 (0.42-1.13)  | 1442 (8.3)                               | 0.82 (0.59-1.12) | 0.80 (0.58-1.10) |
| <b>Ghana/Diabetes</b>     |                                    |                  |                  |                                      |                  |                   |                                          |                  |                  |
| No                        | 49 (28.3)                          | 1.00 (Reference) | 1.00 (Reference) | 49 (10.2)                            | 1.00 (Reference) | 1.00 (Reference)  | 49 (26.4)                                | 1.00 (Reference) | 1.00 (Reference) |
| Yes                       | 148 (24.3)                         | 0.78 (0.37-1.61) | 0.72 (0.34-1.52) | 150 (7.3)                            | 0.55 (0.16-1.81) | 0.57 (0.17-1.88)  | 148 (26.4)                               | 0.93 (0.45-1.97) | 0.90 (0.43-1.92) |
| <b>Discrimination</b>     |                                    |                  |                  |                                      |                  |                   |                                          |                  |                  |
| <b>Europe/No diabetes</b> |                                    |                  |                  |                                      |                  |                   |                                          |                  |                  |
| No                        | 1629 (7.9)                         | 1.00 (Reference) | 1.00 (Reference) | 1609 (2.2)                           | 1.00 (Reference) | 1.00 (Reference)  | 1580 (8.3)                               | 1.00 (Reference) | 1.00 (Reference) |
| Yes                       | 684 (6.7)                          | 0.85 (0.60-1.21) | 0.89 (0.62-1.28) | 669 (1.5)                            | 0.68 (0.33-1.40) | 0.69 (0.32-1.47)  | 661 (7.0)                                | 0.84 (0.59-1.20) | 0.86 (0.59-1.25) |
| <b>Europe/Diabetes</b>    |                                    |                  |                  |                                      |                  |                   |                                          |                  |                  |



|    |                            |            |                         |                         |            |                  |                  |            |                         |                         |
|----|----------------------------|------------|-------------------------|-------------------------|------------|------------------|------------------|------------|-------------------------|-------------------------|
| 1  |                            |            |                         |                         |            |                  |                  |            |                         |                         |
| 2  |                            |            |                         |                         |            |                  |                  |            |                         |                         |
| 3  | No                         | 270 (11.9) | 1.00 (Reference)        | 1.00 (Reference)        | 258 (5.4)  | 1.00 (Reference) | 1.00 (Reference) | 252 (13.1) | 1.00 (Reference)        | 1.00 (Reference)        |
| 4  | Yes                        | 126 (11.1) | 0.87 (0.44-1.71)        | 0.89 (0.45-1.76)        | 122 (5.7)  | 1.29 (0.48-3.45) | 1.25 (0.46-3.37) | 121 (9.1)  | 0.68 (0.32-1.40)        | 0.69 (0.33-1.42)        |
| 5  | <b>Ghana/No diabetes</b>   |            |                         |                         |            |                  |                  |            |                         |                         |
| 6  |                            |            |                         |                         |            |                  |                  |            |                         |                         |
| 7  | No                         | 1854 (8.4) | 1.00 (Reference)        | 1.00 (Reference)        | 1865 (3.5) | 1.00 (Reference) | 1.00 (Reference) | 1851 (9.0) | 1.00 (Reference)        | 1.00 (Reference)        |
| 8  | Yes                        | 99 (8.1)   | 1.03 (0.49-2.17)        | 1.04 (0.49-2.19)        | 99 (2.0)   | 0.79 (0.19-3.33) | 0.78 (0.18-3.29) | 99 (7.1)   | 0.87 (0.39-1.93)        | 0.88 (0.39-1.95)        |
| 9  | <b>Ghana/Diabetes</b>      |            |                         |                         |            |                  |                  |            |                         |                         |
| 10 |                            |            |                         |                         |            |                  |                  |            |                         |                         |
| 11 | No                         | 180 (26.7) | 1.00 (Reference)        | 1.00 (Reference)        | 182 (7.7)  | 1.00 (Reference) | 1.00 (Reference) | 180 (27.2) | 1.00 (Reference)        | 1.00 (Reference)        |
| 12 | Yes                        | 5 (0.0)    | **** (***_***)          | 0.40 (0.05-3.11)        | 5 (0.0)    | **** (***_***)   | **** (***_***)   | 5 (0.0)    | **** (***_***)          | **** (***_***)          |
| 13 | <b>Stress at home/work</b> |            |                         |                         |            |                  |                  |            |                         |                         |
| 14 |                            |            |                         |                         |            |                  |                  |            |                         |                         |
| 15 | <b>Europe/No diabetes</b>  |            |                         |                         |            |                  |                  |            |                         |                         |
| 16 |                            |            |                         |                         |            |                  |                  |            |                         |                         |
| 17 | Never                      | 1137 (7.9) | 1.00 (Reference)        | 1.00 (Reference)        | 1127 (2.3) | 1.00 (Reference) | 1.00 (Reference) | 1102 (8.0) | 1.00 (Reference)        | 1.00 (Reference)        |
| 18 | Some stress                | 860 (7.2)  | 0.90 (0.65-1.27)        | 0.96 (0.68-1.36)        | 850 (1.2)  | 0.49 (0.24-1.02) | 0.49 (0.22-1.07) | 835 (7.4)  | 0.94 (0.67-1.31)        | 0.99 (0.69-1.41)        |
| 19 | Several/Permanent stresses | 335 (8.4)  | 1.04 (0.67-1.62)        | 1.07 (0.68-1.70)        | 327 (2.1)  | 0.84 (0.36-1.95) | 0.92 (0.39-2.17) | 322 (9.6)  | 1.20 (0.77-1.85)        | 1.28 (0.82-1.99)        |
| 20 | <b>Europe/Diabetes</b>     |            |                         |                         |            |                  |                  |            |                         |                         |
| 21 |                            |            |                         |                         |            |                  |                  |            |                         |                         |
| 22 | Never                      | 193 (9.8)  | 1.00 (Reference)        | 1.00 (Reference)        | 184 (8.2)  | 1.00 (Reference) | 1.00 (Reference) | 180 (11.7) | 1.00 (Reference)        | 1.00 (Reference)        |
| 23 | Some stress                | 142 (12.7) | 1.22 (0.61-2.45)        | 1.38 (0.67-2.81)        | 134 (3.0)  | 0.43 (0.13-1.39) | 0.40 (0.12-1.29) | 133 (12.0) | 1.04 (0.52-2.09)        | 1.13 (0.56-2.32)        |
| 24 | Several/Permanent stresses | 62 (12.9)  | 1.31 (0.54-3.16)        | 1.38 (0.56-3.41)        | 63 (3.2)   | 0.49 (0.10-2.29) | 0.46 (0.10-2.23) | 61 (9.8)   | 0.82 (0.31-2.13)        | 0.89 (0.34-2.35)        |
| 25 | <b>Ghana/No diabetes</b>   |            |                         |                         |            |                  |                  |            |                         |                         |
| 26 |                            |            |                         |                         |            |                  |                  |            |                         |                         |
| 27 | Never                      | 628 (7.8)  | 1.00 (Reference)        | 1.00 (Reference)        | 634 (2.7)  | 1.00 (Reference) | 1.00 (Reference) | 628 (7.6)  | 1.00 (Reference)        | 1.00 (Reference)        |
| 28 | Some stress                | 1163 (8.6) | 1.06 (0.74-1.51)        | 0.97 (0.67-1.39)        | 1163 (3.7) | 1.27 (0.71-2.27) | 1.32 (0.74-2.34) | 1158 (9.3) | 1.15 (0.80-1.65)        | 1.10 (0.77-1.58)        |
| 29 | Several/permanent stresses | 339 (7.4)  | 0.88 (0.53-1.46)        | 0.76 (0.46-1.27)        | 341 (3.5)  | 1.24 (0.58-2.67) | 1.35 (0.62-2.95) | 339 (8.9)  | 1.07 (0.66-1.73)        | 1.00 (0.61-1.64)        |
| 30 | <b>Ghana/Diabetes</b>      |            |                         |                         |            |                  |                  |            |                         |                         |
| 31 |                            |            |                         |                         |            |                  |                  |            |                         |                         |
| 32 | Never                      | 54 (38.9)  | 1.00 (Reference)        | 1.00 (Reference)        | 54 (11.1)  | 1.00 (Reference) | 1.00 (Reference) | 54 (37.0)  | 1.00 (Reference)        | 1.00 (Reference)        |
| 33 | Some stress                | 116 (18.9) | <b>0.37 (0.37-0.77)</b> | <b>0.35 (0.17-0.75)</b> | 116 (6.0)  | 0.47 (0.14-1.60) | 0.45 (0.12-1.55) | 116 (19.8) | <b>0.43 (0.21-0.89)</b> | <b>0.40 (0.19-0.86)</b> |
| 34 | Several/Permanent stresses | 26 (25.0)  | 0.44 (0.44-1.29)        | 0.39 (0.13-1.19)        | 28 (10.7)  | 0.65 (0.13-3.21) | 0.62 (0.12-3.23) | 26 (30.8)  | 0.69 (0.25-1.93)        | 0.64 (0.22-1.87)        |
| 35 |                            |            |                         |                         |            |                  |                  |            |                         |                         |
| 36 |                            |            |                         |                         |            |                  |                  |            |                         |                         |
| 37 |                            |            |                         |                         |            |                  |                  |            |                         |                         |
| 38 |                            |            |                         |                         |            |                  |                  |            |                         |                         |
| 39 |                            |            |                         |                         |            |                  |                  |            |                         |                         |
| 40 |                            |            |                         |                         |            |                  |                  |            |                         |                         |
| 41 |                            |            |                         |                         |            |                  |                  |            |                         |                         |
| 42 |                            |            |                         |                         |            |                  |                  |            |                         |                         |
| 43 |                            |            |                         |                         |            |                  |                  |            |                         |                         |
| 44 |                            |            |                         |                         |            |                  |                  |            |                         |                         |
| 45 |                            |            |                         |                         |            |                  |                  |            |                         |                         |
| 46 |                            |            |                         |                         |            |                  |                  |            |                         |                         |
| 47 |                            |            |                         |                         |            |                  |                  |            |                         |                         |

| <b>Depressive symptoms</b> |            |                  |                  |            |                  |                  |            |                  |                  |                  |
|----------------------------|------------|------------------|------------------|------------|------------------|------------------|------------|------------------|------------------|------------------|
| <b>Europe/No diabetes</b>  |            |                  |                  |            |                  |                  |            |                  |                  |                  |
| No                         | 2154 (8.0) | 1.00 (Reference) | 1.00 (Reference) | 2122 (2.1) | 1.00 (Reference) | 1.00 (Reference) | 2087 (8.1) | 1.00 (Reference) | 1.00 (Reference) | 1.00 (Reference) |
| Yes                        | 167 (5.4)  | 0.63 (0.32-1.25) | 0.69 (0.34-1.38) | 163 (2.0)  | 0.65 (0.15-2.72) | 0.72 (0.17-3.04) | 161 (6.8)  | 0.58 (0.25-1.35) | 0.86 (0.46-1.64) | 0.86 (0.46-1.64) |
| <b>Europe/Diabetes</b>     |            |                  |                  |            |                  |                  |            |                  |                  |                  |
| No                         | 351 (12.0) | 1.00 (Reference) | 1.00 (Reference) | 335 (35.9) | 1.00 (Reference) | 1.00 (Reference) | 329 (12.5) | 1.00 (Reference) | 1.00 (Reference) | 1.00 (Reference) |
| Yes                        | 39 (10.3)  | 0.79 (0.26-1.35) | 0.73 (0.24-2.19) | 39 (2.6)   | 0.49 (0.06-3.97) | 0.49 (0.06-3.99) | 38 (7.9)   | 0.89 (0.40-2.01) | 0.60 (0.17-2.08) | 0.60 (0.17-2.08) |
| <b>Ghana/No diabetes</b>   |            |                  |                  |            |                  |                  |            |                  |                  |                  |
| No                         | 2027 (8.3) | 1.00 (Reference) | 1.00 (Reference) | 2035 (3.4) | 1.00 (Reference) | 1.00 (Reference) | 2022 (8.8) | 1.00 (Reference) | 1.00 (Reference) | 1.00 (Reference) |
| Yes                        | 102 (4.9)  | 0.50 (0.20-1.25) | 0.48 (0.19-1.19) | 102 (2.9)  | 0.64 (0.19-2.13) | 0.67 (0.20-2.21) | 102 (7.8)  | 0.69 (0.32-1.46) | 0.71 (0.34-1.51) | 0.71 (0.34-1.51) |
| <b>Ghana/Diabetes</b>      |            |                  |                  |            |                  |                  |            |                  |                  |                  |
| No                         | 185 (26.5) | 1.00 (Reference) | 1.00 (Reference) | 187 (8.7)  | 1.00 (Reference) | 1.00 (Reference) | 185 (27.6) | 1.00 (Reference) | 1.00 (Reference) | 1.00 (Reference) |
| Yes                        | 12 (8.3)   | 0.27 (0.03-2.13) | 0.25 (0.03-2.01) | 12 (0.0)   | *** (****_****)  | *** (***_***)    | 12 (8.3)   | 0.42 (0.05-3.32) | 0.27 (0.03-2.19) | 0.27 (0.03-2.19) |

Model 1, adjusted for age and sex; Model 2, adjusted for age, sex, and educational level for Ghanaians (SSA) and length of stay for those in Europe; Abbreviations: CI, confidence interval; ACR, albumin creatinine ration; eGFR, estimated glomerular filtration rate; CKD, chronic kidney disease; OR, odds ratio, n= total number of Ghanaians living in Ghana and Europe among the various levels of PS constructs; %, proportion of individuals with CKD among the various levels of PS constructs in Ghana and Europe.

**S4: Association of psychosocial stressors (PS) indicators (negative life events, discrimination, stress at work/home and depression) with albuminuria, reduced eGFR and CKD risk for Ghanaians living in Ghana and those living in Europe stratified by hypertensive status**

|                               | Albuminuria (ACR $\geq$ 3 mg/mmol) |                  |                  | eGFR < 60 mL/min/1.73 m <sup>2</sup> |                  |                  | High to very high CKD risk (KDIGO, 2012) |                  |                  |
|-------------------------------|------------------------------------|------------------|------------------|--------------------------------------|------------------|------------------|------------------------------------------|------------------|------------------|
|                               | n (%)                              | OR (95% CI)      |                  | n (%)                                | OR (95% CI)      |                  | n cases (%)                              | OR (95% CI)      |                  |
|                               |                                    | Model 1          | Model 2          |                                      | Model 1          | Model 2          |                                          | Model 1          | Model 2          |
| <b>Negative events</b>        |                                    |                  |                  |                                      |                  |                  |                                          |                  |                  |
| <b>Europe/No hypertension</b> |                                    |                  |                  |                                      |                  |                  |                                          |                  |                  |
| No                            | 568 (6.9)                          | 1.00 (Reference) | 1.00 (Reference) | 562 (1.3)                            | 1.00 (Reference) | 1.00 (Reference) | 551 (7.1)                                | 1.00 (Reference) | 1.00 (Reference) |
| Yes                           | 743 (5.0)                          | 0.72 (0.45-1.15) | 0.78 (0.48-1.27) | 740 (0.8)                            | 0.59 (0.19-1.77) | 0.60 (0.20-1.83) | 724 (5.1)                                | 0.71 (0.44-1.13) | 0.75 (0.46-1.22) |
| <b>Europe/Hypertension</b>    |                                    |                  |                  |                                      |                  |                  |                                          |                  |                  |
| No                            | 560 (9.6)                          | 1.00 (Reference) | 1.00 (Reference) | 544 (4.0)                            | 1.00 (Reference) | 1.00 (Reference) | 539 (10.0)                               | 1.00 (Reference) | 1.00 (Reference) |
| Yes                           | 872 (11.4)                         | 1.22 (0.86-1.73) | 1.20 (0.83-1.73) | 847 (3.9)                            | 0.95 (0.54-1.67) | 0.89 (0.49-1.62) | 833 (11.6)                               | 1.19 (0.83-1.69) | 1.13 (0.78-1.62) |
| <b>Ghana/No Hypertension</b>  |                                    |                  |                  |                                      |                  |                  |                                          |                  |                  |
| No                            | 540 (6.3)                          | 1.00 (Reference) | 1.00 (Reference) | 543 (2.2)                            | 1.00 (Reference) | 1.00 (Reference) | 540 (6.9)                                | 1.00 (Reference) | 1.00 (Reference) |
| Yes                           | 1118 (5.6)                         | 0.88 (0.57-1.36) | 0.84 (0.54-1.31) | 1124 (1.9)                           | 0.82 (0.39-1.69) | 0.86 (0.41-1.79) | 1115 (6.4)                               | 0.93 (0.61-1.40) | 0.90 (0.59-1.36) |
| <b>Ghana/Hypertension</b>     |                                    |                  |                  |                                      |                  |                  |                                          |                  |                  |
| No                            | 192 (21.9)                         | 1.00 (Reference) | 1.00 (Reference) | 193 (10.9)                           | 1.00 (Reference) | 1.00 (Reference) | 192 (22.4)                               | 1.00 (Reference) | 1.00 (Reference) |
| Yes                           | 476 (18.1)                         | 0.78 (0.52-1.18) | 0.79 (0.52-1.20) | 476 (6.9)                            | 0.58 (0.32-1.04) | 0.58 (0.33-1.05) | 474 (18.4)                               | 0.77 (0.50-1.16) | 0.76 (0.51-1.16) |

| <b>Discrimination</b>         |            |                  |                  |            |                         |                         |            |                         |                         |
|-------------------------------|------------|------------------|------------------|------------|-------------------------|-------------------------|------------|-------------------------|-------------------------|
| <b>Europe/No hypertension</b> |            |                  |                  |            |                         |                         |            |                         |                         |
| No                            | 916 (6.3)  | 1.00 (Reference) | 1.00 (Reference) | 907 (0.8)  | 1.00 (Reference)        | 1.00 (Reference)        | 885 (6.8)  | 1.00 (Reference)        | 1.00 (Reference)        |
| Yes                           | 379 (3.7)  | 0.60 (0.33-1.09) | 0.65 (0.36-1.21) | 378 (1.1)  | 1.35 (0.39-4.74)        | 1.37 (0.38-4.89)        | 374 (3.2)  | <b>0.47 (0.25-0.89)</b> | <b>0.51 (0.27-0.97)</b> |
| <b>Europe/Hypertension</b>    |            |                  |                  |            |                         |                         |            |                         |                         |
| No                            | 983 (10.5) | 1.00 (Reference) | 1.00 (Reference) | 960 (4.4)  | 1.00 (Reference)        | 1.00 (Reference)        | 947 (10.9) | 1.00 (Reference)        | 1.00 (Reference)        |
| Yes                           | 431 (10.7) | 1.03 (0.71-1.49) | 1.05 (0.72-1.54) | 413 (3.2)  | 0.73 (0.38-1.39)        | 0.75 (0.38-1.48)        | 408 (11.0) | 1.03 (0.71-1.49)        | 1.04 (0.71-1.53)        |
| <b>Ghana/No hypertension</b>  |            |                  |                  |            |                         |                         |            |                         |                         |
| No                            | 1427 (5.7) | 1.00 (Reference) | 1.00 (Reference) | 1437 (2.2) | 1.00 (Reference)        | 1.00 (Reference)        | 1424 (6.5) | 1.00 (Reference)        | 1.00 (Reference)        |
| Yes                           | 81 (7.4)   | 1.30 (0.55-3.09) | 1.30 (0.55-3.10) | 81 (0.0)   | **** (***)              | **** (***)              | 81 (7.4)   | 1.21 (0.51-2.88)        | 1.22 (0.51-2.89)        |
| <b>Ghana/Hypertension</b>     |            |                  |                  |            |                         |                         |            |                         |                         |
| No                            | 606 (20.3) | 1.00 (Reference) | 1.00 (Reference) | 609 (7.9)  | 1.00 (Reference)        | 1.00 (Reference)        | 606 (20.3) | 1.00 (Reference)        | 1.00 (Reference)        |
| Yes                           | 23 (8.7)   | 0.38 (0.09-1.68) | 0.40 (0.09-1.74) | 23 (8.7)   | 1.27 (0.28-5.70)        | 1.20 (0.26-5.44)        | 23 (4.4)   | 0.19 (0.03-1.44)        | 0.19 (0.03-1.45)        |
| <b>Stress at home/work</b>    |            |                  |                  |            |                         |                         |            |                         |                         |
| <b>Europe/No hypertension</b> |            |                  |                  |            |                         |                         |            |                         |                         |
| Never                         | 644 (6.1)  | 1.00 (Reference) | 1.00 (Reference) | 640 (1.3)  | 1.00 (Reference)        | 1.00 (Reference)        | 625 (5.8)  | 1.00 (Reference)        | 1.00 (Reference)        |
| Some stress                   | 468 (4.5)  | 0.74 (0.43-1.27) | 0.81 (0.46-1.43) | 464 (0.4)  | 0.37 (0.07-1.74)        | 0.41 (0.09-2.01)        | 457 (4.8)  | 0.84 (0.49-1.45)        | 0.91 (0.52-1.60)        |
| Several/Permanent stresses    | 192 (6.8)  | 1.07 (0.56-2.05) | 1.19 (0.61-2.29) | 191 (1.6)  | 1.49 (0.38-5.78)        | 1.52 (0.39-5.98)        | 186 (8.1)  | 1.38 (0.74-2.60)        | 1.49 (0.79-2.84)        |
| <b>Europe/Hypertension</b>    |            |                  |                  |            |                         |                         |            |                         |                         |
| Never                         | 686 (10.2) | 1.00 (Reference) | 1.00 (Reference) | 665 (5.4)  | 1.00 (Reference)        | 1.00 (Reference)        | 657 (11.1) | 1.00 (Reference)        | 1.00 (Reference)        |
| Some stress                   | 534 (11.1) | 1.03 (0.71-1.49) | 1.05 (0.72-1.54) | 520 (2.3)  | <b>0.49 (0.25-0.96)</b> | <b>0.47 (0.23-0.95)</b> | 511 (10.9) | 0.97 (0.67-1.41)        | 0.99 (0.67-0.47)        |
| Several/Permanent stresses    | 205 (11.2) | 1.11 (0.67-1.82) | 1.12 (0.67-1.87) | 199 (3.0)  | 0.56 (0.23-1.37)        | 0.58 (0.24-1.43)        | 197 (11.2) | 0.99 (0.59-1.64)        | 1.03 (0.61-1.74)        |
| <b>Ghana/No hypertension</b>  |            |                  |                  |            |                         |                         |            |                         |                         |
| Never                         | 495 (5.5)  | 1.00 (Reference) | 1.00 (Reference) | 498 (1.4)  | 1.00 (Reference)        | 1.00 (Reference)        | 495 (5.9)  | 1.00 (Reference)        | 1.00 (Reference)        |
| Some stress                   | 899 (5.9)  | 1.07 (0.66-1.73) | 0.99 (0.61-1.60) | 901 (2.2)  | 1.30 (0.54-3.15)        | 1.39 (0.57-3.37)        | 896 (6.5)  | 1.04 (0.65-1.65)        | 1.00 (0.63-1.59)        |

|    |                               |            |                  |                  |            |                   |                   |             |                   |                  |
|----|-------------------------------|------------|------------------|------------------|------------|-------------------|-------------------|-------------|-------------------|------------------|
| 1  |                               |            |                  |                  |            |                   |                   |             |                   |                  |
| 2  |                               |            |                  |                  |            |                   |                   |             |                   |                  |
| 3  | Several/permanent stresses    | 263 (5.7)  | 1.01 (0.53-1.95) | 0.89 (0.46-1.72) | 267 (2.6)  | 1.69 (0.58-5.01)  | 1.89 (0.63-5.65)  | 263 (7.6)   | 1.21 (0.67-2.20)  | 1.15 (0.63-2.11) |
| 4  |                               |            |                  |                  |            |                   |                   |             |                   |                  |
| 5  | <b>Ghana/Hypertension</b>     |            |                  |                  |            |                   |                   |             |                   |                  |
| 6  |                               |            |                  |                  |            |                   |                   |             |                   |                  |
| 7  | Never                         | 187 (22.9) | 1.00 (Reference) | 1.00 (Reference) | 190 (8.4)  | 1.00 (Reference)  | 1.00 (Reference)  | 187 (20.9)  | 1.00 (Reference)  | 1.00 (Reference) |
| 8  | Some stress                   | 379 (18.2) | 0.74 (0.48-1.14) | 0.68 (0.43-1.05) | 377 (7.9)  | 0.95 (0.50-1.80)  | 0.99 (0.51-1.91)  | 377 (19.4)  | 0.90 (0.58-1.40)  | 0.87 (0.55-1.36) |
| 9  | Several/Permanent stresses    | 102 (15.7) | 0.62 (0.33-1.17) | 0.54 (0.28-1.04) | 102 (7.8)  | 0.92 (0.37-2.26)  | 0.97 (0.39-2.43)  | 102 (17.7)  | 0.79 (0.42-1.49)  | 0.76 (0.40-1.43) |
| 10 |                               |            |                  |                  |            |                   |                   |             |                   |                  |
| 11 | <b>Depressive symptoms</b>    |            |                  |                  |            |                   |                   |             |                   |                  |
| 12 |                               |            |                  |                  |            |                   |                   |             |                   |                  |
| 13 | <b>Europe/No hypertension</b> |            |                  |                  |            |                   |                   |             |                   |                  |
| 14 |                               |            |                  |                  |            |                   |                   |             |                   |                  |
| 15 | No                            | 1195 (5.9) | 1.00 (Reference) | 1.00 (Reference) | 1187 (1.1) | 1.00 (Reference)  | 1.00 (Reference)  | 1162 (6.0)  | 1.00 (Reference)  | 1.00 (Reference) |
| 16 | Yes                           | 101 (3.9)  | 0.59 (0.21-1.65) | 0.64 (0.23-1.82) | 99 (1.0)   | 1.18 (0.15-2.72)  | 1.27 (0.16-10.17) | 98 (5.1)    | 0.77 (0.30-1.97)  | 0.84 (0.33-2.17) |
| 17 |                               |            |                  |                  |            |                   |                   |             |                   |                  |
| 18 | <b>Europe/Hypertension</b>    |            |                  |                  |            |                   |                   |             |                   |                  |
| 19 |                               |            |                  |                  |            |                   |                   |             |                   |                  |
| 20 | No                            | 1310(10.9) | 1.00 (Reference) | 1.00 (Reference) | 1270 (4.1) | 1.00 (Reference)  | 1.00 (Reference)  | 1254 (11.2) | 1.00 (Reference)  | 1.00 (Reference) |
| 21 | Yes                           | 105 (8.6)  | 0.76 (0.37-1.53) | 0.75 (0.37-1.55) | 103 (1.9)  | 0.52 (0.12-2.18)  | 0.56 (0.13-2.38)  | 101 (8.9)   | 0.77 (0.38-1.58)  | 0.80 (0.39-1.63) |
| 22 |                               |            |                  |                  |            |                   |                   |             |                   |                  |
| 23 | <b>Ghana/No hypertension</b>  |            |                  |                  |            |                   |                   |             |                   |                  |
| 24 |                               |            |                  |                  |            |                   |                   |             |                   |                  |
| 25 | No                            | 1575 (5.9) | 1.00 (Reference) | 1.00 (Reference) | 1584 (2.1) | 1.00 (Reference)  | 1.00 (Reference)  | 1572 (6.7)  | 1.00 (Reference)  | 1.00 (Reference) |
| 26 | Yes                           | 82 (2.4)   | 0.36 (0.09-1.51) | 0.35 (0.08-1.44) | 82 (1.2)   | 0.39 (0.059-2.95) | 0.39 (0.05-2.97)  | 82 (3.7)    | 0.44 (0.13-1.42)  | 0.43 (0.13-1.40) |
| 27 |                               |            |                  |                  |            |                   |                   |             |                   |                  |
| 28 | <b>Ghana/Hypertension</b>     |            |                  |                  |            |                   |                   |             |                   |                  |
| 29 |                               |            |                  |                  |            |                   |                   |             |                   |                  |
| 30 | No                            | 636 (19.5) | 1.00 (Reference) | 1.00 (Reference) | 637 (8.2)  | 1.00 (Reference)  | 1.00 (Reference)  | 634 (19.6)  | 1.00 (Reference)  | 1.00 (Reference) |
| 31 | Yes                           | 32 (12.5)  | 0.59 (0.20-1.72) | 0.59 (0.20-1.74) | 32 (6.3)   | 0.74 (0.17-3.25)  | 0.76 (0.17-3.33)  | 32 (18.8)   | 0.94 (0.037-2.37) | 0.94 (0.38-2.37) |
| 32 |                               |            |                  |                  |            |                   |                   |             |                   |                  |
| 33 |                               |            |                  |                  |            |                   |                   |             |                   |                  |

Model 1, adjusted for age and sex; Model 2, adjusted for age, sex, and educational level for Ghanaians (SSA) and length of stay for those in Europe; Abbreviations: CI, confidence interval; ACR, albumin creatinine ration; eGFR, estimated glomerular filtration rate; CKD, chronic kidney disease; OR, odds ratio, n= total number of Ghanaians living in Ghana and Europe among the various levels of PS constructs; %, proportion of individuals with CKD among the various levels of PS constructs in Ghana and Europe.

For peer review only

1  
2  
3  
4  
5  
6  
7  
8  
9  
10  
11  
12  
13  
14  
15  
16  
17  
18  
19  
20  
21  
22  
23  
24  
25  
26  
27  
28  
29  
30  
31  
32  
33  
34  
35  
36  
37  
38  
39  
40  
41  
42  
43  
44  
45  
46  
47

STROBE Statement—checklist of items that should be included in reports of observational studies

|                           | Item No. | Recommendation                                                                                      | Page No. | Relevant text from manuscript                                                                                                                                                                                                                                  |
|---------------------------|----------|-----------------------------------------------------------------------------------------------------|----------|----------------------------------------------------------------------------------------------------------------------------------------------------------------------------------------------------------------------------------------------------------------|
| <b>Title and abstract</b> | 1        | (a) Indicate the study’s design with a commonly used term in the title or the abstract              | 1,2      | We have included a commonly used term in the title and abstract                                                                                                                                                                                                |
|                           |          | (b) Provide in the abstract an informative and balanced summary of what was done and what was found | 2        | Our study shows no convincing evidence for associations between stress as indicated by four PS constructs and prevalence of CKD. Further studies aimed at identifying potential factors driving the high prevalence of CKD among these populations are needed. |
| <b>Introduction</b>       |          |                                                                                                     |          |                                                                                                                                                                                                                                                                |
| Background/rationale      | 2        | Explain the scientific background and rationale for the investigation being reported                | 4        | The theoretical and scientific background as well as the rationale for conducting the study have been provided in the introduction section.                                                                                                                    |
| Objectives                | 3        | State specific objectives, including any prespecified hypotheses                                    | 4        | <b>We examined the</b>                                                                                                                                                                                                                                         |

For peer review only

association between PS and CKD prevalence among rural and urban Ghanaians and their migrants living in three European cities. We also assessed if the influence of PS on CKD is partially mediated by primary risk factors (hypertension and diabetes) of CKD.

---

## Methods

|              |   |                                                                                                                                                                                                                                                                                                                                                                                                                                                                                    |     |                                                                                                                                                  |
|--------------|---|------------------------------------------------------------------------------------------------------------------------------------------------------------------------------------------------------------------------------------------------------------------------------------------------------------------------------------------------------------------------------------------------------------------------------------------------------------------------------------|-----|--------------------------------------------------------------------------------------------------------------------------------------------------|
| Study design | 4 | Present key elements of study design early in the paper                                                                                                                                                                                                                                                                                                                                                                                                                            | 5-6 | Details given in the methods                                                                                                                     |
| Setting      | 5 | Describe the setting, locations, and relevant dates, including periods of recruitment, exposure, follow-up, and data collection                                                                                                                                                                                                                                                                                                                                                    | 5-6 | Rural or urban Ghana and three (Amsterdam, Berlin, London) European cities (migrants)                                                            |
| Participants | 6 | <p>(a) <i>Cohort study</i>—Give the eligibility criteria, and the sources and methods of selection of participants. Describe methods of follow-up</p> <p><i>Case-control study</i>—Give the eligibility criteria, and the sources and methods of case ascertainment and control selection. Give the rationale for the choice of cases and controls</p> <p><i>Cross-sectional study</i>—Give the eligibility criteria, and the sources and methods of selection of participants</p> | 6-8 | A multi-centred cross sectional baseline data from the Research on Obesity and Diabetes among African Migrants (RODAM) study. A random sample of |



5,659 adults (Europe, 3167, rural, 1,043, Urban Ghana, 1,449, Ghana) aged 25 to 70 years.

(b) Cohort study—For matched studies, give matching criteria and number of exposed and unexposed  
Case-control study—For matched studies, give matching criteria and the number of controls per case

|                           |    |                                                                                                                                                                                      |     |                                                                                         |
|---------------------------|----|--------------------------------------------------------------------------------------------------------------------------------------------------------------------------------------|-----|-----------------------------------------------------------------------------------------|
| Variables                 | 7  | Clearly define all outcomes, exposures, predictors, potential confounders, and effect modifiers. Give diagnostic criteria, if applicable                                             | 6-8 | The main outcomes have been clearly defined.                                            |
| Data sources/ measurement | 8* | For each variable of interest, give sources of data and details of methods of assessment (measurement). Describe comparability of assessment methods if there is more than one group | 6-8 | We defined each variable of interest in the methods accordingly                         |
| Bias                      | 9  | Describe any efforts to address potential sources of bias                                                                                                                            | 18  | Potential sources of bias have discussed in the discussion section                      |
| Study size                | 10 | Explain how the study size was arrived at                                                                                                                                            | 5   | Given in the methods section and we have also referred to the RODAM study methods paper |

Continued on next page

|                        |     |                                                                                                                                                                                                                                                                                                           |       |                                                                                              |
|------------------------|-----|-----------------------------------------------------------------------------------------------------------------------------------------------------------------------------------------------------------------------------------------------------------------------------------------------------------|-------|----------------------------------------------------------------------------------------------|
| Quantitative variables | 11  | Explain how quantitative variables were handled in the analyses. If applicable, describe which groupings were chosen and why                                                                                                                                                                              | 8-9   | Please see methods                                                                           |
| Statistical methods    | 12  | (a) Describe all statistical methods, including those used to control for confounding                                                                                                                                                                                                                     | 8-9   | Please see methods                                                                           |
|                        |     | (b) Describe any methods used to examine subgroups and interactions                                                                                                                                                                                                                                       | 8-9   | Please see methods                                                                           |
|                        |     | (c) Explain how missing data were addressed                                                                                                                                                                                                                                                               | 8-9   |                                                                                              |
|                        |     | (d) <i>Cohort study</i> —If applicable, explain how loss to follow-up was addressed<br><i>Case-control study</i> —If applicable, explain how matching of cases and controls was addressed<br><i>Cross-sectional study</i> —If applicable, describe analytical methods taking account of sampling strategy | NA    | We have reported non-response across sites                                                   |
|                        |     | (e) Describe any sensitivity analyses                                                                                                                                                                                                                                                                     | NA    |                                                                                              |
| <b>Results</b>         |     |                                                                                                                                                                                                                                                                                                           |       |                                                                                              |
| Participants           | 13* | (a) Report numbers of individuals at each stage of study—eg numbers potentially eligible, examined for eligibility, confirmed eligible, included in the study, completing follow-up, and analysed                                                                                                         | 5     | Non-response analysis was done to shed light on the differential response rates across sites |
|                        |     | (b) Give reasons for non-participation at each stage                                                                                                                                                                                                                                                      | 5     |                                                                                              |
|                        |     | (c) Consider use of a flow diagram                                                                                                                                                                                                                                                                        | 5     | We have also referred to RODAM methods paper                                                 |
| Descriptive data       | 14* | (a) Give characteristics of study participants (eg demographic, clinical, social) and information on exposures and potential confounders                                                                                                                                                                  | 5     | We have also referred to RODAM methods paper                                                 |
|                        |     | (b) Indicate number of participants with missing data for each variable of interest                                                                                                                                                                                                                       | 5     | We have also referred to RODAM methods paper                                                 |
|                        |     | (c) <i>Cohort study</i> —Summarise follow-up time (eg, average and total amount)                                                                                                                                                                                                                          | NA    |                                                                                              |
| Outcome data           | 15* | <i>Cohort study</i> —Report numbers of outcome events or summary measures over time                                                                                                                                                                                                                       | NA    |                                                                                              |
|                        |     | <i>Case-control study</i> —Report numbers in each exposure category, or summary measures of exposure                                                                                                                                                                                                      | NA    |                                                                                              |
|                        |     | <i>Cross-sectional study</i> —Report numbers of outcome events or summary measures                                                                                                                                                                                                                        | 9-10  | Summary measures are given in the results section and in tables and figures                  |
| Main results           | 16  | (a) Give unadjusted estimates and, if applicable, confounder-adjusted estimates and their precision (eg, 95% confidence interval). Make clear which confounders were adjusted for and why they were included                                                                                              | 12-16 | Unadjusted and adjusted estimates are given in the results section and in figures            |
|                        |     | (b) Report category boundaries when continuous variables were categorized                                                                                                                                                                                                                                 | 12-16 | We have provided mean and corresponding standard deviations for the continuous variables.    |

1  
2  
3  
4  
5  
6  
7  
8  
9  
10  
11  
12  
13  
14  
15  
16  
17  
18  
19  
20  
21  
22  
23  
24  
25  
26  
27  
28  
29  
30  
31  
32  
33  
34  
35  
36  
37  
38  
39  
40  
41  
42  
43  
44  
45  
46

(c) If relevant, consider translating estimates of relative risk into absolute risk for a meaningful time NA

Continued on next page

Other analyses 17 Report other analyses done—eg analyses of subgroups and interactions, and sensitivity analyses NA

**Discussion**

Key results 18 Summarise key results with reference to study objectives 8

Limitations 19 Discuss limitations of the study, taking into account sources of potential bias or imprecision. Discuss both direction and magnitude of any potential bias 18 Key limitations regarding study methods including differential response rates and sampling methods in the various study sites have been provided

Interpretation 20 Give a cautious overall interpretation of results considering objectives, limitations, multiplicity of analyses, results from similar studies, and other relevant evidence 17-18 Cautious overall interpretation of the key findings have been provided.

Generalisability 21 Discuss the generalisability (external validity) of the study results 17-18

**Other information**

Funding 22 Give the source of funding and the role of the funders for the present study and, if applicable, for the original study on which the present article is based 19 The funders had no role in study design, data collection and analysis, decision to publish, or preparation of the manuscript

\*Give information separately for cases and controls in case-control studies and, if applicable, for exposed and unexposed groups in cohort and cross-sectional studies.

**Note:** An Explanation and Elaboration article discusses each checklist item and gives methodological background and published examples of transparent reporting. The STROBE checklist is best used in conjunction with this article (freely available on the Web sites of PLoS Medicine at <http://www.plosmedicine.org/>, Annals of Internal Medicine at <http://www.annals.org/>, and Epidemiology at <http://www.epidem.com/>). Information on the STROBE Initiative is available at [www.strobe-statement.org](http://www.strobe-statement.org).

# BMJ Open

## A CROSS SECTIONAL STUDY OF ASSOCIATION BETWEEN PSYCHOSOCIAL STRESSORS WITH CHRONIC KIDNEY DISEASE AMONG MIGRANT AND NON-MIGRANT GHANAIS LIVING IN EUROPE AND GHANA: THE RODAM STUDY

|                                 |                                                                                                                                                                                                                                                                                                                                                                                                                                                                                                                                                                                                                                                                                                                                                                                                                                                                                                                                                                                                                                                                                                                                                                                                                                                                                                                                                                                                                                                                                                                                                                |
|---------------------------------|----------------------------------------------------------------------------------------------------------------------------------------------------------------------------------------------------------------------------------------------------------------------------------------------------------------------------------------------------------------------------------------------------------------------------------------------------------------------------------------------------------------------------------------------------------------------------------------------------------------------------------------------------------------------------------------------------------------------------------------------------------------------------------------------------------------------------------------------------------------------------------------------------------------------------------------------------------------------------------------------------------------------------------------------------------------------------------------------------------------------------------------------------------------------------------------------------------------------------------------------------------------------------------------------------------------------------------------------------------------------------------------------------------------------------------------------------------------------------------------------------------------------------------------------------------------|
| Journal:                        | <i>BMJ Open</i>                                                                                                                                                                                                                                                                                                                                                                                                                                                                                                                                                                                                                                                                                                                                                                                                                                                                                                                                                                                                                                                                                                                                                                                                                                                                                                                                                                                                                                                                                                                                                |
| Manuscript ID                   | bmjopen-2018-027931.R1                                                                                                                                                                                                                                                                                                                                                                                                                                                                                                                                                                                                                                                                                                                                                                                                                                                                                                                                                                                                                                                                                                                                                                                                                                                                                                                                                                                                                                                                                                                                         |
| Article Type:                   | Research                                                                                                                                                                                                                                                                                                                                                                                                                                                                                                                                                                                                                                                                                                                                                                                                                                                                                                                                                                                                                                                                                                                                                                                                                                                                                                                                                                                                                                                                                                                                                       |
| Date Submitted by the Author:   | 12-Mar-2019                                                                                                                                                                                                                                                                                                                                                                                                                                                                                                                                                                                                                                                                                                                                                                                                                                                                                                                                                                                                                                                                                                                                                                                                                                                                                                                                                                                                                                                                                                                                                    |
| Complete List of Authors:       | <p>Adjei Nana, David ; University of Ghana, Department of Medical Laboratory Sciences; University of Amsterdam, Department of Public Health</p> <p>Stronks, Karien; Academic Medical Center , Department of Public Health Adu, Dwomoa; Korle-bu Teaching Hospital, Department of Medicine</p> <p>Beune, Erik; AMC</p> <p>Meeks, Karlijn; AMC, Public Health</p> <p>Smeeth, Liam; London School of Hygiene and Tropical Medicine, Addo, Juliet; London School of Hygiene and Tropical Medicine, Non Communicable Disease Epidemiology</p> <p>Owusu-Dabo, Ellis; Kwame Nkrumah University of Science and Technology, Kumasi Centre for Collaborative Research in Tropical Medicine</p> <p>Klipstein-Grobusch, Kerstin; 1 Julius Global Health, Julius Center for Health Sciences and Primary Care, University Medical Centre Utrecht, Utrecht, The Netherlands</p> <p>Mockenhaupt, Frank; Charité – University Medicine, Berlin, Institute of Tropical Medicine and International Health</p> <p>Schulze, Matthias; German Institute of Human Nutrition Potsdam-Rehbruecke</p> <p>Danquah, Ina; German Institute of Human Nutrition, Molecular Epidemiology; Charite Universitatsmedizin Berlin, Institute for Social Medicine, Epidemiology and Health Economy</p> <p>Spranger, Joachim; Department of Endocrinology and Metabolism, 1. Charité-University Medicine Berlin, Berlin, Germany.</p> <p>Bahendeka, Silver; St. Francis Hospital Nsambya,</p> <p>Agyemang, Charles; Academic Medical centre, University of Amsterdam, Department of Public Health</p> |
| <b>Primary Subject Heading</b>: | Public health                                                                                                                                                                                                                                                                                                                                                                                                                                                                                                                                                                                                                                                                                                                                                                                                                                                                                                                                                                                                                                                                                                                                                                                                                                                                                                                                                                                                                                                                                                                                                  |
| Secondary Subject Heading:      | Epidemiology, Public health, Renal medicine                                                                                                                                                                                                                                                                                                                                                                                                                                                                                                                                                                                                                                                                                                                                                                                                                                                                                                                                                                                                                                                                                                                                                                                                                                                                                                                                                                                                                                                                                                                    |
| Keywords:                       | Chronic Kidney Disease, Psychosocial stressors, migrants, rodam study, Europe, Ghana                                                                                                                                                                                                                                                                                                                                                                                                                                                                                                                                                                                                                                                                                                                                                                                                                                                                                                                                                                                                                                                                                                                                                                                                                                                                                                                                                                                                                                                                           |

1  
2  
3  
4  
5  
6  
7  
8  
9  
10  
11  
12  
13  
14  
15  
16  
17  
18  
19  
20  
21  
22  
23  
24  
25  
26  
27  
28  
29  
30  
31  
32  
33  
34  
35  
36  
37  
38  
39  
40  
41  
42  
43  
44  
45  
46  
47  
48  
49  
50  
51  
52  
53  
54  
55  
56  
57  
58  
59  
60

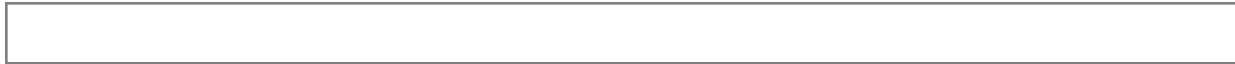

SCHOLARONE™  
Manuscripts

1  
2  
3  
4  
5  
6  
7  
8  
9  
10  
11  
12  
13  
14  
15  
16  
17  
18  
19  
20  
21  
22  
23  
24  
25  
26  
27  
28  
29  
30  
31  
32  
33  
34  
35  
36  
37  
38  
39  
40  
41  
42  
43  
44  
45  
46  
47  
48  
49  
50  
51  
52  
53  
54  
55  
56  
57  
58  
59  
60

**1 A CROSS SECTIONAL STUDY OF ASSOCIATION BETWEEN PSYCHOSOCIAL**  
**2 STRESSORS WITH CHRONIC KIDNEY DISEASE AMONG MIGRANT AND NON-**  
**3 MIGRANT GHANAIS LIVING IN EUROPE AND GHANA: THE RODAM STUDY**

4 David N. Adjei, MSc, PhD<sup>1,2</sup>; Karien Stronks, MSc, PhD<sup>1</sup>; Dwomoa Adu, MD<sup>3</sup>; Erik Beune, MSc, PhD<sup>1</sup>;  
5 Karlijn Meeks, MSc, PhD<sup>1</sup>; Liam Smeeth, MD, PhD<sup>4</sup>; Juliet, Addo, MD, PhD<sup>4</sup>; Ellis Owusu-Dabo, MSc,  
6 PhD<sup>5</sup>; Kerstin Klipstein-Grobusch, MSc, PhD<sup>6,7</sup>; Frank P. Mockenhaupt, MD, PhD<sup>8</sup>; Matthias B. Schulze,  
7 MSc, PhD<sup>9</sup>; Ina, Danquah, MSc, PhD<sup>9,10</sup>; Joachim, Spranger, MD, PhD<sup>11,12,13</sup>; Silver Bahendeka, MD,  
8 PhD<sup>14</sup>; Charles Agyemang, MPH, PHD<sup>1</sup>

- 9 1. Department of Public Health, Academic Medical Center, University of Amsterdam, Amsterdam,  
10 Amsterdam Public Health Research Institute, Amsterdam, The Netherlands.
- 11 2. Department of Medical Laboratory Sciences, School of Biomedical and Allied Health Sciences,  
12 College of Health Sciences, University of Ghana, Accra, Ghana.
- 13 3. Department of Medicine, School of Medicine and Dentistry, University of Ghana and Korle-Bu  
14 Teaching Hospital, Accra, Ghana.
- 15 4. Department of Non-Communicable Disease Epidemiology, London School of Hygiene and Tropical  
16 Medicine, London, United Kingdom.
- 17 5. Kumasi Centre for collaborative Research, KNUST, Kumasi, Ghana.
- 18 6. Julius Global Health, Julius Center for Health Sciences and Primary Care, University Medical Centre,  
19 Utrecht University, The Netherlands
- 20 7. Division of Epidemiology & Biostatistics, School of Public Health, Faculty of Health Sciences,  
21 University of the Witwatersrand, Johannesburg, South Africa
- 22 8. Institute of Tropical Medicine and International Health, Charité –University Medicine Berlin,  
23 Augustenburger Platz 1, 13353 Berlin, Germany.
- 24 9. Department of Molecular Epidemiology, German Institute of Human Nutrition Potsdam-Rehbrücke,  
25 Nuthetal, Germany.
- 26 10. Charité - Universitaetsmedizin Berlin, Institute for Social Medicine, Epidemiology and Health  
27 Economics, Berlin, Germany.
- 28 11. Department of Endocrinology and Metabolism, Charité-University Medicine Berlin, Berlin, Germany.
- 29 12. German Centre for Cardiovascular Research (DZHK), Berlin, Germany.
- 30 13. Center for Cardiovascular Research (CCR), Charité-University, Medicine, Berlin, Germany.
- 31
- 32 14. MKPGMS - Uganda Martyrs University, Kampala, Uganda.

1  
2  
3  
4  
5  
6  
7  
8  
9  
10  
11  
12  
13  
14  
15  
16  
17  
18  
19  
20  
21  
22  
23  
24  
25  
26  
27  
28  
29  
30  
31  
32  
33  
34  
35  
36  
37  
38  
39  
40  
41  
42  
43  
44  
45  
46  
47  
48  
49  
50  
51  
52  
53  
54  
55  
56  
57  
58  
59  
60

39 Address correspondence to David Nana Adjei, MSc, Department of Public Health, Academic Medical  
40 Centre, University of Amsterdam, Meibergdreef 9, 1105 AZ Amsterdam, the Netherlands, School  
41 Biomedical and Allied Health Sciences, Medical Laboratory Sciences, University of Ghana, E-mail:  
42 [dna@chs.edu.gh](mailto:dna@chs.edu.gh), [d.n.adjei@amc.uva.nl](mailto:d.n.adjei@amc.uva.nl), Tel: +233236717850

For peer review only

## Abstract

**Objectives:** The association between Psychosocial stressors (PS) and CKD among sub-Saharan African (SSA) populations is unknown. We examined the association between PS and CKD prevalence among rural and urban Ghanaians and Ghanaian migrants living in three European cities. We also assessed if the influence of PS on CKD is partially mediated by primary risk factors (hypertension and diabetes) of CKD.

**Design:** A multi-centred cross sectional data from the Research on Obesity and Diabetes among African Migrants (RODAM) study.

**Setting:** Rural and urban Ghana and three European cities (Amsterdam, Berlin and London).

**Participants:** A random sample of 5,659 adults (Europe 3167, rural Ghana 1,043, and Urban Ghana 1,449) aged 25 to 70 years.

**Explanatory and outcome measures:** PS was defined by negative life events, perceived discrimination, perceived stress at work/home and depressive symptoms. Three CKD outcomes were considered using the 2012 KDIGO (Kidney Disease: Improving Global Outcomes) severity of CKD classification. Comparisons between PS and CKD outcomes were made using logistic regression analyses across all sites.

**Results:** We observed higher proportion of negative life events (68.7%) and perceived permanent stress (15.9%) among Ghanaians living in Ghana than Ghanaians living in Europe. Depressive symptoms (7.5%) and perceived discrimination (29.7%) were more common among Ghanaians living in Europe than Ghanaians living in Ghana. No significant association was observed between any of the PS constructs and CKD outcomes across sites except for positive association between stress at work/home and albuminuria (2.81, 95% C.I. 1.46-5.40) and CKD risk (2.78, 95% C.I. 1.43-5.43) among Ghanaians living in Berlin.

**Conclusion:** Our study shows no convincing evidence of associations between PS constructs and the prevalence of CKD outcomes. Further studies are needed to identify potential factors driving the high prevalence of CKD among these populations.

**Index Words:** Chronic kidney disease; psychosocial stressors; risk factor; migrants; RODAM study, Europe, Ghana



### Strengths and limitations of the study

- This study used all three categories of CKD definitions (albuminuria, reduced eGFR and CKD risk) by KDIGO 2012 in assessing association of SS with CKD across all sites. This provided more detailed information on CKD outcomes.
- All sites in our study used well standardized study protocols and this eliminated intra protocol variability.
- The use of four constructs of psychosocial stressors (negative life events, perceived discrimination, perceived stress at work/home and depressive symptoms) provided a robust approach to assessing SS associations with CKD.
- The limitation of intra laboratory variability in earlier studies was eliminated using the same standard operating procedures in the same laboratory for running all samples for all sites.
- PS is captured and experienced in different magnitude across different populations. We were unable to ascertain if PS as defined in this study was adequately captured among Ghanaians living in rural and urban Ghana.

## 180 Introduction

181  
182 Worldwide, Chronic Kidney Disease (CKD) is a leading cause of mortality and morbidity with several risk  
183 factors (diabetes mellitus, obesity, hypertension and cardiovascular disease)<sup>1</sup>. The epidemiologic transition  
184 in low-and-middle income countries (LMICs) shows increased burden of these risk factors<sup>2-4</sup>. CKD's high  
185 morbidity and mortality is mostly driven by uncontrolled comorbidities such as diabetes and hypertension  
186<sup>5 6</sup>. CKD treatment and management cost is very high and not sustainable even in high-income countries  
187 and this underscores the need for prevention<sup>7</sup>. Available literature has shown that both individual and  
188 community level economic factors influence CKD<sup>8-10</sup>. However, after adjusting for both individual and  
189 community level socioeconomic position, differences in CKD risk among different populations remained<sup>8</sup>  
190<sup>10 11</sup>. These findings seem to suggest that other social environmental factors may be driving CKD prevalence  
191 and progression in high-risk populations. Recent studies have shown that whereas Ghanaians living in  
192 Europe have a higher CKD risk compared to their host nation populations, they have a lower CKD risk  
193 compared with their peers living in urban Ghana<sup>12</sup>. The increased risk of CKD observed in urban Ghana  
194 was not fully explained by conventional risk factors<sup>12</sup> and socio-economic status<sup>13</sup>. This underscores the  
195 need to identify other modifiable risk factors of CKD for prevention, optimum treatment and efficient  
196 management.

197  
198 Evidence shows that where an individual works or stays influences his or her physiological wellbeing  
199 leading to an increased risk of chronic diseases<sup>14 15</sup>. Thus, migrants' physiological wellbeing is influenced  
200 by the environment (host nations) they move to stay. The association between PS and CKD as well as the  
201 biological pathways through which PS influences CKD progression is poorly understood and complex<sup>5</sup>  
202 although several pathways have been suggested<sup>16 17</sup>. Specifically, PS have been reported to be associated  
203 with alteration in the sympathetic/autonomic nervous system activity leading to higher rates of traditional  
204 risk factors of CKD including hypertension and diabetes<sup>18-20</sup>. Environmental stressors have been reported  
205 to contribute to the development of insulin resistance, metabolic syndrome, obesity and diabetes which if  
206 uncontrolled leads to CKD incidence<sup>21 22</sup>. Other studies<sup>23 24</sup> have suggested that stress attributable to social  
207 and/or economic disadvantage is associated with CKD development and progression through an interaction  
208 between other psychosocial factors and comorbid behaviors such as alcohol, tobacco and drug use<sup>25</sup>. In  
209 addition, undernutrition due to stress adversely impact on fetal environment by impeding fetal growth  
210 leading to low birth weight, which has been shown to be associated with CKD in adult life<sup>25 26</sup>.

211  
212 However, studies linking psychosocial stressors (PS) to CKD prevalence and progression vary greatly  
213 among different geographical populations.<sup>5 16 27-31</sup>. Specifically, in the USA whereas no association was  
214 found between PS and CKD<sup>31-33</sup> another study reported lower prevalence of CKD was associated with

1  
2  
3 215 greater life stressors at baseline<sup>31</sup>. In contrast, in the Netherlands depressive and anxiety symptoms were  
4 216 observed to be common among CKD patients and such patients had increased risk of poor clinical outcomes  
5 217<sup>28</sup>. Similarly, a study conducted in Korea reported a positive relationship between depressive symptoms and  
6 218 CKD<sup>27</sup>. These observations suggest differential impact of PS at different geographical locations. For  
7 219 example, discrimination among migrants may differ greatly between host population and from their SSA  
8 220 compatriots. Specifically, some studies have reported differences in PS among rural and urban populations  
9 221<sup>34</sup>.

14 222 Current literature on the association between PS and CKD among sub-Saharan African populations and  
15 223 their migrants in Europe is scanty and uncertain. We therefore sought to determine the association between  
16 224 PS and CKD prevalence among Ghanaians in rural and urban Ghana and their migrants living in three  
17 225 European cities. Furthermore, we examined the influence of psychosocial stressors on risk factors (obesity,  
18 226 diabetes and hypertension) of CKD.

22 227

## 23 228 **Methods**

24 229

### 25 230 ***Study population and study design***

26 231

28 232 For this study, data from the Research on Obesity & Diabetes among African Migrants (RODAM) study, a  
29 233 multi-centre cross sectional study, were used. The rationale, conceptual framework, design and  
30 234 methodology of the RODAM study have been described in detail elsewhere<sup>12 13 35 36</sup>. To summarize, the  
31 235 study was conducted from 2012 to 2015. Ghanaians aged 25–70 years living in rural and urban communities  
32 236 in Ghana as well as in three European cities (Amsterdam, Berlin and London) were included in this study.  
33 237 We standardized data collection across all sites. The ethics committees in Ghana, the Netherlands, Germany  
34 238 and the UK approved the study protocol prior to data collection. Informed consent was obtained from each  
35 239 participant prior to enrollment in the study. In Ghana, participants were randomly drawn from a list of 30  
36 240 enumeration areas in the Ashanti region based on the 2010 population census. These enumeration areas  
37 241 came from both rural areas and two purposively selected urban cities (Kumasi and Obuasi). For Ghanaians  
38 242 in Amsterdam, we randomly drew participants from the Municipal register. This register holds data on  
39 243 country of birth of citizens and their parents, thus allowing for sampling based on the Dutch standard  
40 244 indicator for ethnic origin. London lacked a population register for migrant groups. Thus, Ghanaian  
41 245 organizations served as sampling frame for the study. Lists of these organizations were obtained from the  
42 246 Ghanaian Embassy and the Association of Ghanaian Churches in the UK in the boroughs known to have  
43 247 the greatest concentration of Ghanaians. Members were selected from the lists of all members of these  
44 248 organizations. In Berlin, the registration office of the federal state of Berlin provided a list of Ghanaian  
45 249 individuals in Berlin but this resulted in low response rate. Because of this, a change was made to use lists

1  
2  
3 250 of Ghanaian churches and organizations as the sampling frame. Across all sites in Europe, all selected  
4 251 participants were sent a written invitation combined with written information (information sheet) regarding  
5 252 the study and a response card. The participants were contacted by phone to schedule a date and location of  
6 253 the interview with a trained research assistant or opt for the self-administration of the paper questionnaire  
7 254 or digital online version depending on the preference of the participant. After the completion of the  
8 255 questionnaire, a date for physical examination was then scheduled after a positive response. The participants  
9 256 were instructed to fast from 10.00 p.m. the night before the physical examination. The response rate was  
10 257 76% in rural Ghana and 74% in urban Ghana. In London, of those individuals who were registered in the  
11 258 various Ghanaian organizations and were invited, 75% agreed and participated in the study, while in Berlin,  
12 259 this figure was 68%, and 53% in Amsterdam. For the current study, 5898 participants with data available  
13 260 on both questionnaire data and physical measurements were used. Individuals who were outside the age  
14 261 range of 25–70 years (n=239) were excluded because not all the study sites had individuals outside this age  
15 262 range resulting in 5659 individuals comprising of 2492 from rural and urban Ghana and 3167 from the three  
16 263 European cities. In the conduct of analysis, we further excluded individuals with no data on CKD and all  
17 264 other indicators (n=52), resulting in a data set of 5607 participants for analysis.

## 265 266 **Measurements**

## 267 268 **Covariates**

### 269 *Demographic and lifestyle factors*

270 For this study, we obtained information on demographics, educational level and lifestyle factors (smoking  
271 and physical activity) by questionnaire. Physical examinations were performed across all sites using  
272 validated devices per standardized operational procedures. Weight was measured in light clothing and  
273 without shoes with SECA 877 scales to the nearest 0.1 kg. Height was measured without shoes with a  
274 portable stadiometer (SECA 217) to the nearest 0.1 cm. Body mass index (BMI) was calculated as weight  
275 (kg) divided by height squared (m<sup>2</sup>). Overweight was defined as BMI of 25 to < 30 kg/m<sup>2</sup> and obesity as  
276 BMI  $\geq$ 30 kg/m<sup>2</sup>. Waist circumference was measured in centimetres at the midpoint between the lower rib  
277 and the upper margin of the iliac crest. We used the same assessor for each participant in measuring all  
278 anthropometrics and each was measured twice; the average of the two measurements was used for analyses.

### 279 *Predictor: SS*

280 For this study, four constructs of psychosocial stress (discrimination, perceived stress at work or at home,  
281 negative life events and depressive symptoms) were used as explanatory variables.

### 282 *Perceived discrimination*

1  
2  
3 283 Everyday discrimination as perceived by participants was reported as routinely experiencing instances of  
4 284 unfair treatment. We used the the Everyday Discrimination Scale (EDS). The EDS comprises of a 9-items  
5 285 which rates the frequency at which participants experience daily mistreatment and it focuses on being  
6 286 treated with less courtesy or less respect, receiving poorer service than other people or being called names  
7 287 or insulted. Participants had the option of rating each of the 9-items from “never” = 1 to “very often” = 5.  
8 288 The obtained scores were summed and an average of the scores was computed to obtain a final score of 1  
9 289 to 5. This scale was used because it is commonly used for self-reported discrimination <sup>37</sup>, with consistent  
10 290 high reliability among a variety of ethnicities <sup>38</sup>, comprising African migrants in the Netherland <sup>39</sup>.

### 17 291 *Perceived stress at work or at home*

18 292 We defined perceived stress at work or at home as “sense of irritation, filled with anxiety, or as having  
19 293 difficulties in sleeping because of circumstances at work or at home”. We used the psychological stress  
20 294 scale created by the INTERHEART study <sup>40</sup>. Participants in the study were asked about their opinion on  
21 295 frequency of stress at work and at home, and could answer “never”, “some periods”, “several periods”, or  
22 296 “continually”. Both answers were then combined into a composite score and graded into four categories:  
23 297 never experienced to experienced permanent stress at home or at work <sup>40</sup>. Due to the very small numbers in  
24 298 the permanent periods of stress group, we combined experienced several periods of stress at home or at  
25 299 work and permanent periods of stress at home or at work.

### 32 302 *Negative life events*

34 303 The presence of major negative life events among participants was perceived as any event that could cause  
35 304 acute stress to an individual. We therefore applied the well-validated and widely used List of Threatening  
36 305 Experiences (LTE) <sup>41 42</sup>. The scale comprised of 12 unpleasant events participants perceived to have  
37 306 experienced in the past 12 months. We used a slightly-altered version of LTE consisting of 9 unpleasant  
38 307 items. We dichotomized participants into two groups namely “no negative life events” and “one or more  
39 308 events” and participants in the second category were expected to have higher levels of stress <sup>42</sup>.

### 45 309 *Depressive symptoms*

47 310 Depressive symptoms were measured by the 9-item Patient Health Questionnaire (PHQ-9). The PHQ-9  
48 311 consists of nine items, with a response scales 0 ‘not at all’, 1 ‘on several days’, 2 ‘on more than half of the  
49 312 days’ and 3 ‘nearly every day’. A participant was considered to be in a significant depressed mood (SDM)  
50 313 when one or both of the items 1 (little interest or pleasure in doing things) and 2 (feeling down, depressed,  
51 314 or hopeless) were answered with at least ‘on more than half of the days’, and at least 5 of the 9 items were  
52 315 answered with at least ‘on more than half of the days’<sup>43</sup>.

### 316 ***Co-morbidity factors***

317 Blood pressure (BP) was measured three times using a validated semi-automated device (The Microlife  
318 WatchBP home) with appropriate cuffs in a sitting position after at least 5min rest. The mean of the last  
319 two BP measurements was used in the analyses. Hypertension was defined as systolic BP 140mmHg and/or  
320 diastolic BP 90mmHg, and/or being on antihypertensive medication treatment, and/or self-reported  
321 hypertension. Trained research assistants in all sites collected fasting venous blood samples according to  
322 standard operation procedures, and then temporarily stored at the local research location. The stored blood  
323 samples from the local research centres were transported to Berlin, Germany, according to standardized  
324 procedures, for biochemical analyses. This was done to avoid intra-laboratory variability. Fasting plasma  
325 glucose concentration was measured using an enzymatic method (hexokinase). We defined Type 2 diabetes  
326 according to the World Health Organization diagnostic criteria (fasting glucose 7.0mmol/L, and/or current  
327 use of medication prescribed to treat diabetes, and/or self-reported diabetes) <sup>44</sup>. We assessed concentration  
328 of total cholesterol using colorimetric test kits. All biochemical analyses were performed using an ABX  
329 Pentra 400 Chemistry Analyzer (ABX Pentra; Horiba 90 ABX, Germany). Hypercholesterolaemia was  
330 defined as total cholesterol level  $\geq 6.22$ mmol/L. Serum creatinine concentration (in mol/L) was determined  
331 by a kinetic colorimetric spectrophotometric isotope dilution mass spectrometry calibration method (Roche  
332 Diagnostics).

### 333 **Outcome: CKD prevalence**

334 We asked participants to bring an early morning urine sample for the analyses of albuminuria and creatinine  
335 levels. Urinary albumin concentration (in  $\mu$ mol/L) was measured by an immunochemical turbidimetric  
336 method (Roche Diagnostics). Urinary creatinine concentration (in  $\mu$ mol/L) was measured by a kinetic  
337 spectrophotometric method (Roche Diagnostics). Extensive quality checks were done inclusive of blinded  
338 serial measurements. Estimated glomerular filtration rate (eGFR) was calculated using the CKDEPI (CKD  
339 Epidemiology Collaboration) creatinine equation <sup>45</sup>. Urinary albumin–creatinine ratio (ACR; expressed in  
340 mg/mmol) was calculated by taking the ratio between urinary albumin and urinary creatinine. eGFR and  
341 albuminuria were categorized according to the 2012 KDIGO classification <sup>46</sup>. eGFR was categorized as  
342 follows: G1, 90mL/min/1.73m<sup>2</sup> (normal kidney function); G2, 60–89mL/min/1.73m<sup>2</sup> (mildly decreased);  
343 G3a, 45–59mL/min/1.73m<sup>2</sup> (mildly to moderately decreased); G3b, 30–44mL/min/1.73m<sup>2</sup> (moderately to  
344 severely decreased); G4, 15–29 mL/min/1.73 m<sup>2</sup> (severely decreased); and G5, <15mL/min/1.73m<sup>2</sup> (kidney  
345 failure). Albuminuria categories were derived from ACR and were as follows: A1, < 3mg/mmol (normal  
346 to mildly increased); A2, 3–30mg/mmol (moderately increased); and A3, > 30mg/mmol (severely  
347 increased). CKD status was categorized according to severity of kidney disease (green, low risk; yellow,  
348 moderately increased risk; orange, high risk; and red, very high risk) using the combination of eGFR (G1–



349 G5) and albuminuria (A1–A3) levels defined by the 2012 KDIGO guideline<sup>47</sup>. Due to the small number of  
350 participants in the very high-risk category of CKD (n=27), the high and very high-risk groups were  
351 combined. Because of the small number of participants in the severely increased albuminuria category (A3,  
352 n=62), we defined albuminuria as ACR 3mg/ mmol by combining the moderately increased (A2) and  
353 severely increased (A3) categories.

354  
355 Covariates assessed were age, sex, educational level and length of stay in Europe, hypertension and  
356 diabetes. Length of stay was assessed for Ghanaian migrants only. Length of stay was defined as the number  
357 of years lived in Europe at the time of data collection. Length of stay was controlled for due to evidence  
358 suggesting that it influences mental health<sup>48</sup>. Other covariates were hypertension, obesity and diabetes.

### 359 360 ***Patient and Public Involvement***

361 Community leaders were involved in the recruitment of patients. These comprised of religious communities  
362 (churches and mosques), endorsement from local key leaders and establishing relationships with healthcare  
363 organizations. We also provided information on the study by involving the local media (radio and television  
364 stations). We sent letters to all selected health and community authorities to notify participants of the study.  
365 Team members were sent to the various communities to stay among the community and organize mini  
366 clinics for a period of 1-2 weeks. Results of the study were disseminated through seminars, durbars and via  
367 radio and television stations.

### 368 ***Statistical methods***

369 Characteristics of participants were expressed as absolute numbers and percentages for categorical variables  
370 and means and standard deviations for continuous variables. The z-test was used to compare proportions of  
371 demographic and clinical variables among the various sites and the independent t-test was also used to test  
372 for mean differences between the two sites. Odds Ratios (ORs) and their corresponding 95% confidence  
373 intervals (CIs) were estimated by means of binary logistic regression analyses to study the associations of  
374 albuminuria (ACR>3 mg/mmol, A2-A3, moderately to severely increased albuminuria), reduced kidney  
375 function (eGFR< 60 mL/min/1.73m<sup>2</sup>, G3-G5 moderately to severely decreased kidney function) and  
376 increased CKD risk (high and very high CKD risk), with adjustments for covariates<sup>49</sup>. The Spearman's  
377 correlation test was used to test for associations between all four constructs of PS. Three models were used  
378 to examine the data. Model 1 was adjusted for age and sex, model 2 was adjusted for age and sex and  
379 educational level for Ghanaians living in SSA while age, sex, educational level and length of stay for  
380 Ghanaians living in Europe<sup>50-52</sup>. Model 3 was adjusted for sex, age, educational level and conventional risk  
381 factors (hypertension, diabetes, hypercholesterolemia, BMI, physical activity and smoking status) of CKD.

1  
2  
3 382 The analyses were performed for all 4 constructs of PS using individuals who have not experienced either  
4 383 of the PS per outcome as reference. All tests were stratified per sites due to interactions, Ghanaians living  
5 384 in SSA and Europe; Ghanaians living in rural and urban Ghana and Ghanaians living in Amsterdam, Berlin  
6 385 and London due to an observed interaction between PS and site. Furthermore, the analyses were stratified  
7 386 for those with and without obesity, diabetes, hypertension across all sites. P-values less than 0.05 were  
8 387 interpreted as statistically significant. All analyses were performed using STATA, version 14.0 (StataCorp  
9 388 LP).

## 15 389 **Results**

### 17 390 *Characteristics of the study population*

18 391  
19 392 Participants characteristics are shown in Table 1. Ghanaians living in Ghana were significantly older than  
20 393 their peers living in Europe (47.7±11.9 versus 46.6±9.9, p=0.006). There were more female participants in the  
21 394 Ghana sample compared with European sample (67.1% versus 58.5%, p=0.001). Ghanaians living in  
22 395 Ghana were significantly less educated than those living in Europe. Higher proportion of Ghanaians living  
23 396 in Ghana had experienced negative life events in the last 12 months compared with their peers living in  
24 397 Europe (68.7% versus 59.0%, p=0.001). More than half of Ghanaians living in Ghana had experienced  
25 398 some stress at home or work whereas only a third of those living in Europe had experienced some stress at  
26 399 home or work (p=0.001). Permanent stress at home/work was fairly the same among Ghanaians living in  
27 400 SSA and Europe. Perceived discrimination was significantly higher among Ghanaians living in Europe  
28 401 compared with their peers living in Ghana (29.7% versus 4.8%, p=0.001). Depressive symptoms were more  
29 402 prevalent among Ghanaians living in Europe 7.5% compared with their peers living in Ghana 5.1%. Almost  
30 403 all Ghanaians living in Europe were first generation migrants. Ghanaians in Europe were significantly more  
31 404 obese, more likely to smoke and less physically active compared with their peers living in Ghana.  
32 405 Prevalence of hypercholesterolemia was significantly higher, but type 2 diabetes and hypertension were  
33 406 significantly lower among Ghanaians living in Ghana compared with their peers living in Europe (p=0.001).  
34 407 Prevalence of albuminuria, reduced eGRF and CKD risk were higher in Ghanaians living in Ghana  
35 408 compared with those living in Europe.

36 409

37 410

38 411

39 412



413 **Table 1: Baseline characteristics of respondents**

|                                                   | Ghanaians (SSA)<br>n (%) | Ghanaians (Europe)<br>n (%) | p-value        |
|---------------------------------------------------|--------------------------|-----------------------------|----------------|
| <b>N</b>                                          | 2,492 (44.1)             | 3,167 (55.9)                | 0.001          |
| <b>Female sex</b>                                 | 1672 (67.1)              | 1,851 (58.5)                | 0.001          |
| <b>Age (years)</b>                                | 47.7±11.9                | 46.6±9.9                    | 0.006          |
| <b>Educational status</b>                         |                          |                             |                |
| Low                                               | 1169 (49.2)              | 635 (21.8)                  | 0.001          |
| Middle                                            | 858 (36.1)               | 1111 (38.1)                 |                |
| High                                              | 347 (14.6)               | 1168 (40.1)                 |                |
| <b>Negative life events in the past 12 months</b> |                          |                             |                |
| No                                                | 739 (31.3)               | 1158 (41.0)                 | 0.001          |
| Yes                                               | 1619 (68.7)              | 1667 (59.0)                 |                |
| <b>Perceived stress at home/work</b>              |                          |                             |                |
| Never                                             | 692 (29.4)               | 1371 (48.8)                 | 0.001          |
| Some periods                                      | 1290 (54.7)              | 1033 (36.8)                 |                |
| Several/Permanent                                 | 375 (15.9)               | 407 (14.4)                  |                |
| <b>Perceived discrimination</b>                   |                          |                             |                |
| No                                                | 2065 (95.2)              | 1960 (70.3)                 | 0.001          |
| Yes                                               | 104 (4.8)                | 829 (29.7)                  |                |
| <b>Depressive symptoms</b>                        |                          |                             |                |
| No                                                | 2239 (94.9)              | 2582 (92.5)                 | 0.001          |
| Yes                                               | 119 (5.1)                | 209 (7.5)                   |                |
| <b>Migration generation</b>                       |                          |                             |                |
| First                                             | Not applicable           | 2868 (98.7)                 | Not applicable |
| Second                                            | Not applicable           | 38 (1.3)                    | Not applicable |
| <b>BMI</b>                                        |                          |                             |                |
| Normal (<25kg/m <sup>2</sup> )                    | 1373 (55.2)              | 643 (20.4)                  | 0.001          |
| Overweight (25 ≤ 30kg/m <sup>2</sup> )            | 684 (27.5)               | 1,350 (42.8)                |                |

|                                        |             |             |       |
|----------------------------------------|-------------|-------------|-------|
| Obese (>30kg/m <sup>2</sup> )          | 432 (17.3)  | 1163 (36.8) |       |
| Currently smoking                      | 36 (1.5)    | 121 (4.1)   | 0.001 |
| <b>Physical activity</b>               | 1255 (52.8) | 1131 (44.0) | 0.001 |
| <b>Hypocholesteraemia</b>              | 352 (14.2)  | 354 (11.3)  | 0.007 |
| <b>Type 2 diabetes</b>                 | 206 (8.3)   | 444 (14.0)  | 0.001 |
| <b>Hypertension</b>                    | 837 (33.6)  | 1801 (56.9) | 0.001 |
| <b>ACR</b>                             |             |             |       |
| A1 < 3mg/mmol                          | 2215 (90.2) | 2814 (91.8) | 0.001 |
| A2-A ≥ 3mg/mmol                        | 243 (9.8)   | 252 (8.2)   |       |
| <b>eGFR</b>                            |             |             |       |
| G1-G2 ≥ 60 mL/min/1.73 m <sup>2</sup>  | 2377 (96.3) | 2936 (97.4) | 0.018 |
| G3a-G5 < 60 mL/min/1.73 m <sup>2</sup> | 85 (3.7)    | 78 (2.6)    |       |
| <b>CKD Risk</b>                        |             |             |       |
| Low risk                               | 2197 (89.6) | 2705 (91.5) | 0.015 |
| Moderate-very high risk                | 256 (10.4)  | 252 (8.5)   |       |

**Abbreviations:** N, number of respondents; BMI, body mass index; eGFR, estimated glomerular filtration rate; G1-G2, normal to high kidney function to mildly decreased; G3a-G5, mildly to moderately decreased to Kidney failure; ACR, albumin creatinine ratio; A1, normal to mildly increased; A2-A3, moderately increased to severely increased; CKD, Chronic kidney disease; SSA, Sub-Saharan Africa; CI, confidence intervals.

#### 420 *Association between PS and CKD*

421 Figure 1-4 shows CKD prevalence by negative life events in the past 12 months among Ghanaians living  
 422 in Ghana and Europe. In Europe, CKD prevalence was fairly the same among those who had experienced  
 423 any negative life events compared with those who had not in the last 12 months. Prevalence of CKD was  
 424 higher among Ghanaians who had not experienced any negative life events in the past 12 months (10.9%)  
 425 compared with those who had experienced some negative life events (9.9%) and living in Ghana. CKD  
 426 prevalence was higher among Ghanaians who had not experienced any form of discrimination (10.6%) than  
 427 those who had (6.7%) in Ghana as well as in Europe (Figure 2). CKD prevalence was slightly higher among  
 428 Ghanaians who had experienced several/permanent stress at work/home in the past 12 months and living  
 429 in Ghana (10.4%) or Europe (9.7%) (Figure 3). Ghanaians who did not report any form of depressive  
 430 symptoms had a significantly higher CKD prevalence than those who did and living in Ghana (10.4%) and  
 431 Europe (8.7%) (Figure 4).

433 Table 2 shows the correlation matrix between the 4 constructs of PS among Ghanaians living in Ghana and  
 434 those living in Europe. All four constructs of PS were positively correlated with each other among  
 435 Ghanaians living in Europe and Ghanaians living in Ghana ( $p < 0.001$ ), except stress at work/home and  
 436 discrimination among Ghanaians living in Ghana.

437  
 438 **Table 2: Relationship between PS constructs (negative life events, discrimination, stress at**  
 439 **work or home and depression) by Ghanaians (SSA) and Ghanaians (Europe)**

| Correlation matrix  | Negative events | Discrimination | Stress at work/home | Depression |
|---------------------|-----------------|----------------|---------------------|------------|
| <b>Europe</b>       |                 |                |                     |            |
| Negative events     | 1.000           |                |                     |            |
| Discrimination      | 0.152**         | 1.000          |                     |            |
| Stress at work/home | 0.297**         | 0.161**        | 1.000               |            |
| Depressive symptoms | 0.143**         | 0.136**        | 0.285**             | 1.000      |
| <b>Ghana</b>        |                 |                |                     |            |
| Negative events     | 1.000           |                |                     |            |
| Discrimination      | 0.079**         | 1.000          |                     |            |
| Stress at work/home | 0.101**         | -0.032         | 1.000               |            |
| Depressive symptoms | 0.091**         | 0.042          | 0.185**             | 1.000      |

442 **\*\*Significant at 1%, Spearman's correlation**

444 Table 3 shows association between all 4 constructs of PS and CKD among Ghanaians living in Ghana and  
 445 those living in Europe. There was no statistically significant association between PS and albuminuria,  
 446 reduced eGFR and CKD risk among Ghanaians living in Ghana and those living in Europe except  
 447 individuals living in Europe with some stress and lower risk of reduced eGFR (0.46, 95% C.I. 0.24-0.88).  
 448 Table S1 shows further adjustments for conventional risk factors of CKD. This did not show any  
 449 statistically significant associations between PS and albuminuria, reduced eGFR and CKD risk  
 450 among Ghanaians living in Ghana and Europe (Table S1). Table S2 shows further stratification  
 451 based on obesity status. We did not find any association between PS and CKD for obese participants and  
 452 those who were not obese for Ghanaians living in rural and urban Ghana and those living in Europe.  
 453 However, we observed an inverse association between PS and CKD among migrants who were not obese  
 454 but have experienced discrimination for the past 12 months (0.63 95% C.I. 0.41-0.97) (Table S2). In Table  
 455 S3 we stratified our analysis based on diabetic status. We did not find any associations between PS and

1  
2  
3 456 CKD for participants with and without diabetes for both Ghanaians living in rural and urban Ghana and  
4  
5 457 their migrant peers in Europe (Table S3). Finally, Table S4 stratified analysis by hypertension status. No  
6  
7 458 associations were observed between PS and CKD for individuals who had hypertension and those who did  
8  
9 459 not have hypertension for both those living in rural and urban Ghana as well as their compatriots living in  
10  
11 460 Europe. An inverse association was observed between PS and CKD among Ghanaians who have  
12  
13 461 experienced discrimination in the last 12 months with no hypertension and living in Europe (0.51, 95% C.I.  
14  
15 462 0.27-0.97). Also, we observed that having experienced some stress at home/work was inversely associated  
16  
17 463 with reduced eGFR among Ghanaians with hypertension and living in Europe (0.47, 95% C.I. 0. 0.23-0.95)  
18  
19 464 (Table S4).  
20  
21 465  
22  
23 466  
24  
25 467  
26  
27 468  
28  
29 469  
30  
31 470  
32  
33 471  
34  
35 472  
36  
37 473  
38  
39  
40  
41  
42  
43  
44  
45  
46  
47  
48  
49  
50  
51  
52  
53  
54  
55  
56  
57  
58  
59  
60

474

475 **Table 3: Association of psychosocial stressors (PS) indicators (negative life events, discrimination, stress at work/home and depression) with**  
 476 **albuminuria, reduced eGFR and CKD risk for Ghanaians living in Ghana and those living in Europe**

477

|                            | Albuminuria (ACR $\geq$ 3 mg/mmol) |                  |                   | eGFR < 60 mL/min/1.73 m <sup>2</sup> |                         |                         | High to very high CKD risk (KDIGO, 2012) |                  |                  |
|----------------------------|------------------------------------|------------------|-------------------|--------------------------------------|-------------------------|-------------------------|------------------------------------------|------------------|------------------|
|                            | n (%)                              | OR (95% CI)      |                   | n (%)                                | OR (95% CI)             |                         | n cases (%)                              | OR (95% CI)      |                  |
|                            |                                    | Model 1          | Model 2           |                                      | Model 1                 | Model 2                 |                                          | Model 1          | Model 2          |
| <b>Negative events</b>     |                                    |                  |                   |                                      |                         |                         |                                          |                  |                  |
| <b>Europe</b>              |                                    |                  |                   |                                      |                         |                         |                                          |                  |                  |
| No                         | 1128 (8.2)                         | 1.00 (Reference) | 1.00 (Reference)  | 1106 (2.6)                           | 1.00 (Reference)        | 1.00 (Reference)        | 1090 (8.5)                               | 1.00 (Reference) | 1.00 (Reference) |
| Yes                        | 1615 (8.4)                         | 1.03 (0.78-1.35) | 1.07 (0.80-1.42)  | 1587 (2.5)                           | 0.86 (0.53-1.42)        | 0.83 (0.49-1.39)        | 1557 (8.6)                               | 0.97 (0.76-1.32) | 0.99 (0.74-1.32) |
| <b>Ghana</b>               |                                    |                  |                   |                                      |                         |                         |                                          |                  |                  |
| No                         | 732 (8.7)                          | 1.00 (Reference) | 1.00 (Reference)  | 736 (4.5)                            | 1.00 (Reference)        | 1.00 (Reference)        | 732 (10.9)                               | 1.00 (Reference) | 1.00 (Reference) |
| Yes                        | 1595 (3.8)                         | 0.87 (0.65-1.16) | 0.85 (0.63-1.14)  | 1601 (3.4)                           | 0.69 (0.45-1.08)        | 0.67 (0.44-1.09)        | 1590 (9.9)                               | 0.88 (0.66-1.17) | 0.86 (0.64-1.15) |
| <b>Discrimination</b>      |                                    |                  |                   |                                      |                         |                         |                                          |                  |                  |
| <b>Europe</b>              |                                    |                  |                   |                                      |                         |                         |                                          |                  |                  |
| No                         | 1899 (8.5)                         | 1.00 (Reference) | 1.00 (Reference)  | 1867 (2.6)                           | 1.00 (Reference)        | 1.00 (Reference)        | 1832 (8.9)                               | 1.00 (Reference) | 1.00 (Reference) |
| Yes                        | 810 (7.4)                          | 0.87 (0.64-1.19) | 0.92 (0.67-1.26)  | 791 (2.2)                            | 0.83 (0.47-1.47)        | 0.84 (0.46-1.52)        | 782 (7.3)                                | 0.82 (0.59-1.12) | 0.84 (0.60-1.16) |
| <b>Ghana</b>               |                                    |                  |                   |                                      |                         |                         |                                          |                  |                  |
| No                         | 2034 (10.0)                        | 1.00 (Reference) | 1.00 (Reference)  | 2047 (3.9)                           | 1.00 (Reference)        | 1.00 (Reference)        | 2031 (10.6)                              | 1.00 (Reference) | 1.00 (Reference) |
| Yes                        | 104 (7.7)                          | 0.83 (0.39-1.73) | 0.91 (0.67-1.24)  | 104 (1.9)                            | 0.67 (0.15-2.85)        | 0.67 (0.16-2.84)        | 104 (6.7)                                | 0.70 (0.32-1.55) | 0.71 (0.32-1.55) |
| <b>Stress at home/work</b> |                                    |                  |                   |                                      |                         |                         |                                          |                  |                  |
| <b>Europe</b>              |                                    |                  |                   |                                      |                         |                         |                                          |                  |                  |
| Never                      | 1330 (8.2)                         | 1.00 (Reference) | 1.00 (Reference)  | 1305 (3.4)                           | 1.00 (Reference)        | 1.00 (Reference)        | 1282 (8.5)                               | 1.00 (Reference) | 1.00 (Reference) |
| Some stress                | 1002 (7.9)                         | 0.97 (0.72-1.31) | 1.04 (0.76-1.42)  | 984 (1.4)                            | <b>0.47 (0.26-0.87)</b> | <b>0.46 (0.24-0.88)</b> | 968 (8.6)                                | 0.96 (0.71-1.30) | 1.02 (0.74-1.39) |
| Several/Permanent stresses | 397 (9.1)                          | 1.11 (0.74-1.64) | 1.153 (0.77-1.72) | 390 (2.3)                            | 0.73 (0.35-1.52)        | 0.76 (0.36-1.61)        | 383 (9.7)                                | 1.13 (0.77-1.68) | 1.19 (0.80-1.79) |
| <b>Ghana</b>               |                                    |                  |                   |                                      |                         |                         |                                          |                  |                  |
| Never                      | 682 (10.3)                         | 1.00 (Reference) | 1.00 (Reference)  | 688 (3.3)                            | 1.00 (Reference)        | 1.00 (Reference)        | 682 (9.9)                                | 1.00 (Reference) | 1.00 (Reference) |

|    |                            |            |                  |                  |            |                  |                  |             |                  |                  |
|----|----------------------------|------------|------------------|------------------|------------|------------------|------------------|-------------|------------------|------------------|
| 1  |                            |            |                  |                  |            |                  |                  |             |                  |                  |
| 2  |                            |            |                  |                  |            |                  |                  |             |                  |                  |
| 3  | Some stress                | 1279 (9.5) | 0.87 (0.64-1.19) | 0.80 (0.59-1.11) | 1279 (3.9) | 1.06 (0.63-1.77) | 1.11 (0.66-1.87) | 1274 (10.3) | 0.95 (0.69-1.30) | 0.92 (0.67-1.26) |
| 4  | Several/Permanent stresses | 365 (8.5)  | 0.75 (0.48-1.18) | 0.68 (0.59-1.11) | 369 (4.1)  | 1.13 (0.57-2.23) | 1.22 (0.61-2.46) | 365 (10.4)  | 0.96 (0.63-1.47) | 0.92 (0.59-1.42) |
| 5  |                            |            |                  |                  |            |                  |                  |             |                  |                  |
| 6  | <b>Depressive symptoms</b> |            |                  |                  |            |                  |                  |             |                  |                  |
| 7  |                            |            |                  |                  |            |                  |                  |             |                  |                  |
| 8  | <b>Europe</b>              |            |                  |                  |            |                  |                  |             |                  |                  |
| 9  |                            |            |                  |                  |            |                  |                  |             |                  |                  |
| 10 | No                         | 2505 (8.5) | 1.00 (Reference) | 1.00 (Reference) | 2457 (2.7) | 1.00 (Reference) | 1.00 (Reference) | 2416 (8.7)  | 1.00 (Reference) | 1.00 (Reference) |
| 11 | Yes                        | 206 (6.3)  | 0.71 (0.39-1.27) | 0.76 (0.43-1.36) | 202 (1.5)  | 0.63 (0.19-2.03) | 0.68 (0.21-2.23) | 199 (7.1)   | 0.78 (0.44-1.37) | 0.83 (0.47-1.46) |
| 12 |                            |            |                  |                  |            |                  |                  |             |                  |                  |
| 13 | <b>Ghana</b>               |            |                  |                  |            |                  |                  |             |                  |                  |
| 14 | No                         | 2212 (9.9) | 1.00 (Reference) | 1.00 (Reference) | 2222 (3.8) | 1.00 (Reference) | 1.00 (Reference) | 2207 (10.4) | 1.00 (Reference) | 1.00 (Reference) |
| 15 | Yes                        | 114 (5.3)  | 0.45 (0.19-1.03) | 0.45 (0.19-1.01) | 114 (2.6)  | 0.52 (0.16-1.72) | 0.53 (0.17-1.74) | 114 (7.9)   | 0.62 (0.30-1.25) | 0.61 (0.30-1.24) |

16 **478** Model 1, adjusted for age and sex; Model 2, adjusted for age, sex, and educational level for Ghanaians (SSA) and length of stay for those in Europe; Abbreviations: CI, confidence interval; ACR,  
 17 **479** albumin creatinine ration; eGFR, estimated glomerular filtration rate; CKD, chronic kidney disease; OR, odds ratio, n= total number of Ghanaians living in Ghana and Europe among the various levels  
 18 **480** of PS constructs; %, proportion of individuals with CKD among the various levels of PS constructs in Ghana and Europe

1  
2  
3 481 Table 4 shows associations between all 4 constructs of PS and CKD stratified by Ghanaians living  
4  
5 482 in urban and rural Ghana. There was no association between PS and albuminuria, reduced eGFR  
6  
7 483 and CKD risk among Ghanaians living rural and urban Ghana.  
8  
9  
10  
11  
12  
13  
14  
15  
16  
17  
18  
19  
20  
21  
22  
23  
24  
25  
26  
27  
28  
29  
30  
31  
32  
33  
34  
35  
36  
37  
38  
39  
40  
41  
42  
43  
44  
45  
46  
47  
48  
49  
50  
51  
52  
53  
54  
55  
56  
57  
58  
59  
60

484

485 **Table 4: Association of psychosocial stressors (PS) indicators (negative life events, discrimination, stress at work/home and depressive symptoms) with**  
 486 **albuminuria, reduced eGFR and CKD risk among rural and urban Ghana**

487

488

|                            | Albuminuria (ACR $\geq$ 3 mg/mmol) |                  |                  | eGFR < 60 mL/min/1.73 m <sup>2</sup> |                  |                  | High to very high CKD risk (KDIGO, 2012) |                  |                  |
|----------------------------|------------------------------------|------------------|------------------|--------------------------------------|------------------|------------------|------------------------------------------|------------------|------------------|
|                            | n (%)                              | OR (95% CI)      |                  | n (%)                                | OR (95% CI)      |                  | n cases (%)                              | OR (95% CI)      |                  |
|                            |                                    | Model 1          | Model 2          |                                      | Model 1          | Model 2          |                                          | Model 1          | Model 2          |
| <b>Negative events</b>     |                                    |                  |                  |                                      |                  |                  |                                          |                  |                  |
| <b>Urban Ghana</b>         |                                    |                  |                  |                                      |                  |                  |                                          |                  |                  |
| No                         | 477 (11.9)                         | 1.00 (Reference) | 1.00 (Reference) | 477 (4.4)                            | 1.00 (Reference) | 1.00 (Reference) | 477 (12.2)                               | 1.00 (Reference) | 1.00 (Reference) |
| Yes                        | 912 (10.5)                         | 0.87 (0.61-1.23) | 0.87 (0.61-1.24) | 911 (3.4)                            | 0.73 (0.41-1.31) | 0.72 (0.40-1.29) | 910 (10.8)                               | 0.87 (0.61-1.24) | 0.87 (0.61-1.25) |
| <b>Rural Ghana</b>         |                                    |                  |                  |                                      |                  |                  |                                          |                  |                  |
| No                         | 255 (7.5)                          | 1.00 (Reference) | 1.00 (Reference) | 259 (4.6)                            | 1.00 (Reference) | 1.00 (Reference) | 255 (8.6)                                | 1.00 (Reference) | 1.00 (Reference) |
| Yes                        | 683 (7.6)                          | 0.97 (0.56-1.69) | 0.94 (0.54-1.64) | 690 (3.5)                            | 0.63 (0.31-1.31) | 0.66 (0.32-1.37) | 680 (8.8)                                | 0.93 (0.55-1.58) | 0.92 (0.54-1.56) |
| <b>Discrimination</b>      |                                    |                  |                  |                                      |                  |                  |                                          |                  |                  |
| <b>Urban Ghana</b>         |                                    |                  |                  |                                      |                  |                  |                                          |                  |                  |
| No                         | 1326 (11.1)                        | 1.00 (Reference) | 1.00 (Reference) | 1326 (3.9)                           | 1.00 (Reference) | 1.00 (Reference) | 1325 (11.4)                              | 1.00 (Reference) | 1.00 (Reference) |
| Yes                        | 71 (8.5)                           | 0.85 (0.36-2.00) | 0.89 (0.37-2.11) | 71 (2.8)                             | 1.17 (0.27-2.09) | 1.16 (0.27-2.06) | 71 (7.1)                                 | 0.69 (0.27-1.77) | 0.72 (0.28-1.83) |
| <b>Rural Ghana</b>         |                                    |                  |                  |                                      |                  |                  |                                          |                  |                  |
| No                         | 708 (8.1)                          | 1.00 (Reference) | 1.00 (Reference) | 721 (3.9)                            | 1.00 (Reference) | 1.00 (Reference) | 706 (9.2)                                | 1.00 (Reference) | 1.00 (Reference) |
| Yes                        | 33 (6.1)                           | 0.79 (0.18-3.47) | 0.84 (0.19-2.65) | 33 (0.0)                             | ***              | ***              | 33 (6.1)                                 | 0.75 (0.17-2.89) | 0.83 (0.19-2.65) |
| <b>Stress at home/work</b> |                                    |                  |                  |                                      |                  |                  |                                          |                  |                  |
| <b>Urban Ghana</b>         |                                    |                  |                  |                                      |                  |                  |                                          |                  |                  |
| Never                      | 460 (10.9)                         | 1.00 (Reference) | 1.00 (Reference) | 460 (3.3)                            | 1.00 (Reference) | 1.00 (Reference) | 460 (10.2)                               | 1.00 (Reference) | 1.00 (Reference) |
| Some stress                | 732 (11.5)                         | 1.04 (0.71-1.51) | 0.91 (0.62-1.37) | 730 (4.1)                            | 1.27 (0.66-2.43) | 1.30 (0.67-2.51) | 730 (11.8)                               | 1.13 (0.77-1.65) | 1.04 (0.71-1.53) |
| Several/Permanent stresses | 197 (9.6)                          | 0.87 (0.50-1.52) | 0.74 (0.42-1.02) | 198 (3.5)                            | 1.17 (0.46-2.84) | 1.20 (0.47-3.09) | 197 (11.7)                               | 1.15 (0.68-1.71) | 1.05 (0.61-1.81) |



1  
2  
3  
4  
5  
6  
7  
8  
9  
10  
11  
12  
13  
14  
15  
16  
17  
18  
19  
20  
21  
22  
23  
24  
25  
26  
27  
28  
29  
30  
31  
32  
33  
34  
35  
36  
37  
38  
39  
40  
41  
42  
43  
44  
45  
46  
47

**Rural Ghana**

|                            |           |                  |                  |           |                  |                  |           |                  |                  |
|----------------------------|-----------|------------------|------------------|-----------|------------------|------------------|-----------|------------------|------------------|
| Never                      | 222 (9.0) | 1.00 (Reference) | 1.00 (Reference) | 228 (3.5) | 1.00 (Reference) | 1.00 (Reference) | 222 (9.5) | 1.00 (Reference) | 1.00 (Reference) |
| Some stress                | 547 (6.9) | 0.69 (0.39-1.23) | 0.68 (0.38-1.22) | 549 (3.6) | 0.88 (0.38-2.07) | 0.92 (0.39-2.18) | 544 (8.3) | 0.74 (0.42-1.30) | 0.75 (0.42-1.31) |
| Several/Permanent stresses | 168 (7.1) | 0.63 (0.30-1.37) | 0.60 (0.28-1.29) | 171 (4.7) | 1.07(0.38-3.03)  | 1.21(0.43-3.46)  | 168 (8.9) | 0.71 (0.34-1.50) | 0.73 (0.35-1.50) |

**Depressive symptoms**

**Urban Ghana**

|     |             |                  |                  |            |                  |                  |             |                  |                  |
|-----|-------------|------------------|------------------|------------|------------------|------------------|-------------|------------------|------------------|
| No  | 1336 (11.3) | 1.00 (Reference) | 1.00 (Reference) | 1335 (3.8) | 1.00 (Reference) | 1.00 (Reference) | 1334 (11.5) | 1.00 (Reference) | 1.00 (Reference) |
| Yes | 52 (3.9)    | 0.30 (0.07-1.25) | 0.30 (0.07-1.27) | 52 (1.9)   | 0.46 (0.06-2.50) | 0.45 (0.06-2.13) | 52 (5.8)    | 0.44 (0.14-1.45) | 0.45 (0.14-1.48) |

**Rural Ghana**

|     |           |                  |                  |           |                  |                  |           |                  |                  |
|-----|-----------|------------------|------------------|-----------|------------------|------------------|-----------|------------------|------------------|
| No  | 876 (7.7) | 1.00 (Reference) | 1.00 (Reference) | 887 (3.8) | 1.00 (Reference) | 1.00 (Reference) | 873 (8.7) | 1.00 (Reference) | 1.00 (Reference) |
| Yes | 62 (6.5)  | 0.67 (0.23-1.94) | 0.67 (0.23-1.94) | 62 (3.2)  | 0.58 (0.13-2.56) | 0.61 (0.14-2.68) | 62 (9.7)  | 0.82 (0.33-2.01) | 0.85 (0.34-2.09) |

489 Model 1, adjusted for age and sex; Model 2, adjusted for age, sex, and educational level; Abbreviations: CI, confidence interval; ACR, albumin creatinine ration; eGFR, estimated glomerular filtration  
490 rate; CKD, chronic kidney disease; OR, odds ratio, n= total number of Ghanaians living in urban and rural Ghana among the various levels of PS constructs; %, proportion of individuals with CKD  
491 among the various levels of PS constructs in rural and urban Ghana. \*\*\*, no case of CKD and therefore odds ratios were not calculated

1  
2  
3 508 Table 5 shows associations between all 4 constructs of PS and CKD stratified by Ghanaians living in  
4 509 Amsterdam, Berlin and London. There were no associations between PS and albuminuria, reduced eGFR  
5 510 and CKD risk among Ghanaians living in Europe except for positive association between stress at  
6 511 work/home and albuminuria (2.81, 95% C.I. 1.46-5.40) and CKD risk (2.78, 95% C.I. 1.43-5.43) among  
7 512 Ghanaians living in Berlin.  
8  
9  
10  
11  
12  
13  
14  
15  
16  
17  
18  
19  
20  
21  
22  
23  
24  
25  
26  
27  
28  
29  
30  
31  
32  
33  
34  
35  
36  
37  
38  
39  
40  
41  
42  
43  
44  
45  
46  
47  
48  
49  
50  
51  
52  
53  
54  
55  
56  
57  
58  
59  
60

For peer review only

513

514 **Table 5: Association of psychosocial stressors (PS) indicators (negative life events, discrimination, stress at work/home and depressive symptoms) with**  
 515 **albuminuria, reduced eGFR and CKD risk among Ghanaians in three European cities.**

516

517

|                            | Albuminuria (ACR $\geq$ 3 mg/mmol) |                  |                  | eGFR < 60 mL/min/1.73 m <sup>2</sup> |                  |                  | High to very high CKD risk (KDIGO, 2012) |                  |                  |
|----------------------------|------------------------------------|------------------|------------------|--------------------------------------|------------------|------------------|------------------------------------------|------------------|------------------|
|                            | n (%)                              | OR (95% CI)      |                  | n (%)                                | OR (95% CI)      |                  | n (%)                                    | OR (95% CI)      |                  |
|                            |                                    | Model 1          | Model 2          |                                      | Model 1          | Model 2          |                                          | Model 1          | Model 2          |
| <b>Negative events</b>     |                                    |                  |                  |                                      |                  |                  |                                          |                  |                  |
| <b>Amsterdam</b>           |                                    |                  |                  |                                      |                  |                  |                                          |                  |                  |
| No                         | 548 (7.3)                          | 1.00 (Reference) | 1.00 (Reference) | 534 (2.4)                            | 1.00 (Reference) | 1.00 (Reference) | 521 (7.5)                                | 1.00 (Reference) | 1.00 (Reference) |
| Yes                        | 784 (7.8)                          | 1.08 (0.71-1.63) | 1.18 (0.77-1.81) | 764 (2.9)                            | 1.11 (0.55-2.23) | 1.15 (0.55-2.37) | 742 (8.0)                                | 1.06 (0.69-1.62) | 1.08 (0.71-1.66) |
| <b>Berlin</b>              |                                    |                  |                  |                                      |                  |                  |                                          |                  |                  |
| No                         | 213 (9.9)                          | 1.00 (Reference) | 1.00 (Reference) | 213 (2.4)                            | 1.00 (Reference) | 1.00 (Reference) | 213 (10.8)                               | 1.00 (Reference) | 1.00 (Reference) |
| Yes                        | 329 (10.9)                         | 1.12 (0.63-1.99) | 1.19 (0.67-2.15) | 330 (1.8)                            | 0.64 (0.19-2.17) | 0.61 (0.18-2.11) | 329 (9.4)                                | 0.86 (0.48-1.52) | 0.91 (0.51-1.63) |
| <b>London</b>              |                                    |                  |                  |                                      |                  |                  |                                          |                  |                  |
| No                         | 367 (8.7)                          | 1.00 (Reference) | 1.00 (Reference) | 359 (3.1)                            | 1.00 (Reference) | 1.00 (Reference) | 356 (8.7)                                | 1.00 (Reference) | 1.00 (Reference) |
| Yes                        | 502 (7.8)                          | 0.89 (0.55-1.46) | 0.83 (0.49-1.41) | 493 (2.2)                            | 0.68 (0.28-1.65) | 0.58 (0.22-1.51) | 486 (9.1)                                | 1.04 (0.64-1.68) | 0.99 (0.58-1.68) |
| <b>Discrimination</b>      |                                    |                  |                  |                                      |                  |                  |                                          |                  |                  |
| <b>Amsterdam</b>           |                                    |                  |                  |                                      |                  |                  |                                          |                  |                  |
| No                         | 956 (8.3)                          | 1.00 (Reference) | 1.00 (Reference) | 935 (2.9)                            | 1.00 (Reference) | 1.00 (Reference) | 909 (8.5)                                | 1.00 (Reference) | 1.00 (Reference) |
| Yes                        | 363 (5.0)                          | 0.59 (0.34-1.00) | 0.59 (0.35-1.02) | 349 (2.1)                            | 0.69 (0.30-1.62) | 0.81 (0.34-1.91) | 342 (5.9)                                | 0.69 (0.41-1.14) | 0.69 (0.41-1.16) |
| <b>Berlin</b>              |                                    |                  |                  |                                      |                  |                  |                                          |                  |                  |
| No                         | 329 (10.0)                         | 1.00 (Reference) | 1.00 (Reference) | 329 (2.1)                            | 1.00 (Reference) | 1.00 (Reference) | 329 (10.3)                               | 1.00 (Reference) | 1.00 (Reference) |
| Yes                        | 209 (11.0)                         | 1.11 (0.63-1.95) | 1.16 (0.65-2.05) | 210 (1.9)                            | 0.83 (0.24-2.93) | 0.82 (0.23-2.91) | 209 (9.1)                                | 0.86 (0.48-1.56) | 0.89 (0.49-1.63) |
| <b>London</b>              |                                    |                  |                  |                                      |                  |                  |                                          |                  |                  |
| No                         | 614 (7.9)                          | 1.00 (Reference) | 1.00 (Reference) | 603 (2.5)                            | 1.00 (Reference) | 1.00 (Reference) | 594 (8.9)                                | 1.00 (Reference) | 1.00 (Reference) |
| Yes                        | 238 (7.9)                          | 1.03 (0.59-1.81) | 1.18 (0.65-2.15) | 232 (2.6)                            | 1.29 (0.46-3.59) | 1.09 (0.35-3.43) | 231 (7.8)                                | 0.93 (0.53-1.63) | 0.98 (0.52-1.82) |
| <b>Stress at home/work</b> |                                    |                  |                  |                                      |                  |                  |                                          |                  |                  |

|    |                            |                                                                                                                                                                                                       |                         |                         |            |                  |                  |            |                         |                         |
|----|----------------------------|-------------------------------------------------------------------------------------------------------------------------------------------------------------------------------------------------------|-------------------------|-------------------------|------------|------------------|------------------|------------|-------------------------|-------------------------|
| 1  |                            |                                                                                                                                                                                                       |                         |                         |            |                  |                  |            |                         |                         |
| 2  |                            |                                                                                                                                                                                                       |                         |                         |            |                  |                  |            |                         |                         |
| 3  |                            |                                                                                                                                                                                                       |                         |                         |            |                  |                  |            |                         |                         |
| 4  | <b>Amsterdam</b>           |                                                                                                                                                                                                       |                         |                         |            |                  |                  |            |                         |                         |
| 5  | Never                      | 634 (8.4)                                                                                                                                                                                             | 1.00 (Reference)        | 1.00 (Reference)        | 622 (3.2)  | 1.00 (Reference) | 1.00 (Reference) | 603 (8.0)  | 1.00 (Reference)        | 1.00 (Reference)        |
| 6  | Some stress                | 478 (5.7)                                                                                                                                                                                             | 0.68 (0.42-1.11)        | 0.69 (0.42-1.13)        | 462 (1.9)  | 0.64 (0.29-1.43) | 0.68 (0.30-1.52) | 452 (6.0)  | 0.74 (0.45-1.20)        | 0.74 (0.45-1.22)        |
| 7  | Several/Permanent stresses | 210 (9.1)                                                                                                                                                                                             | 1.09 (0.63-1.91)        | 1.12 (0.64-1.95)        | 204 (2.5)  | 0.71 (0.26-1.95) | 0.77 (0.28-2.14) | 198 (10.1) | 1.24 (0.71-2.14)        | 1.26 (0.73-2.20)        |
| 8  |                            |                                                                                                                                                                                                       |                         |                         |            |                  |                  |            |                         |                         |
| 9  | <b>Berlin</b>              |                                                                                                                                                                                                       |                         |                         |            |                  |                  |            |                         |                         |
| 10 | Never                      | 250 (9.0)                                                                                                                                                                                             | 1.00 (Reference)        | 1.00 (Reference)        | 250 (2.0)  | 1.00 (Reference) | 1.00 (Reference) | 250 (6.4)  | 1.00 (Reference)        | 1.00 (Reference)        |
| 11 | Some stress                | 196 (15.3)                                                                                                                                                                                            | <b>2.50 (1.33-4.71)</b> | <b>2.81 (1.46-5.40)</b> | 197 (1.5)  | 0.88 (0.20-3.79) | 0.83 (0.19-3.62) | 196 (14.8) | <b>2.57 (1.34-4.90)</b> | <b>2.78 (1.43-5.43)</b> |
| 12 | Several/Permanent stresses | 96 (10.4)                                                                                                                                                                                             | 1.64 (0.72-3.73)        | 1.69 (0.73-3.91)        | 197 (3.1)  | 2.10 (0.47-9.46) | 2.04 (0.44-9.26) | 76 (9.4)   | 1.52 (0.65-3.58)        | 1.58 (0.66-3.75)        |
| 13 |                            |                                                                                                                                                                                                       |                         |                         |            |                  |                  |            |                         |                         |
| 14 |                            |                                                                                                                                                                                                       |                         |                         |            |                  |                  |            |                         |                         |
| 15 |                            |                                                                                                                                                                                                       |                         |                         |            |                  |                  |            |                         |                         |
| 16 | <b>London</b>              |                                                                                                                                                                                                       |                         |                         |            |                  |                  |            |                         |                         |
| 17 | Never                      | 446 (9.2)                                                                                                                                                                                             | 1.00 (Reference)        | 1.00 (Reference)        | 433 (4.4)  | 1.00 (Reference) | 1.00 (Reference) | 429 (10.5) | 1.00 (Reference)        | 1.00 (Reference)        |
| 18 | Some stress                | 328 (7.0)                                                                                                                                                                                             | 0.73 (0.43-1.25)        | 0.79 (0.44-1.40)        | 325 (0.6)  | 0.17 (0.04-0.73) | 0.09 (0.01-0.67) | 320 (6.9)  | 0.65 (0.38-1.10)        | 0.66 (0.37-1.19)        |
| 19 | Several/permanent stresses | 91 (7.7)                                                                                                                                                                                              | 0.81 (0.35-1.87)        | 0.86 (0.35-2.14)        | 90 (1.1)   | 0.27 (0.03-2.12) | 0.24 (0.03-2.05) | 74 (8.9)   | 0.83 (0.38-1.83)        | 0.92 (0.39-2.16)        |
| 20 |                            |                                                                                                                                                                                                       |                         |                         |            |                  |                  |            |                         |                         |
| 21 |                            |                                                                                                                                                                                                       |                         |                         |            |                  |                  |            |                         |                         |
| 22 | <b>Depressive symptoms</b> |                                                                                                                                                                                                       |                         |                         |            |                  |                  |            |                         |                         |
| 23 |                            |                                                                                                                                                                                                       |                         |                         |            |                  |                  |            |                         |                         |
| 24 | <b>Amsterdam</b>           |                                                                                                                                                                                                       |                         |                         |            |                  |                  |            |                         |                         |
| 25 | No                         | 1199 (7.8)                                                                                                                                                                                            | 1.00 (Reference)        | 1.00 (Reference)        | 1135 (2.8) | 1.00 (Reference) | 1.00 (Reference) | 1135 (7.9) | 1.00 (Reference)        | 1.00 (Reference)        |
| 26 | Yes                        | 121 (6.6)                                                                                                                                                                                             | 0.81 (0.39-1.72)        | 0.83 (0.39-1.76)        | 118 (1.7)  | 0.65 (0.15-2.77) | 0.71 (0.16-3.06) | 116 (6.9)  | 0.83 (0.39-1.76)        | 0.82 (0.38-1.74)        |
| 27 |                            |                                                                                                                                                                                                       |                         |                         |            |                  |                  |            |                         |                         |
| 28 | <b>Berlin</b>              |                                                                                                                                                                                                       |                         |                         |            |                  |                  |            |                         |                         |
| 29 | No                         | 503 (10.7)                                                                                                                                                                                            | 1.00 (Reference)        | 1.00 (Reference)        | 504 (2.2)  | 1.00 (Reference) | 1.00 (Reference) | 503 (10.1) | 1.00 (Reference)        | 1.00 (Reference)        |
| 30 | Yes                        | 34 (5.9)                                                                                                                                                                                              | 0.53 (0.12-2.27)        | 0.49 (0.11-2.13)        | 34 (0.0)   | ***              | ***              | 34 (5.9)   | 0.55 (0.13-2.37)        | 0.52 (0.12-2.24)        |
| 31 |                            |                                                                                                                                                                                                       |                         |                         |            |                  |                  |            |                         |                         |
| 32 | <b>London</b>              |                                                                                                                                                                                                       |                         |                         |            |                  |                  |            |                         |                         |
| 33 | No                         | 803 (8.3)                                                                                                                                                                                             | 1.00 (Reference)        | 1.00 (Reference)        | 785 (2.6)  | 1.00 (Reference) | 1.00 (Reference) | 778 (8.9)  | 1.00 (Reference)        | 1.00 (Reference)        |
| 34 | Yes                        | 51 (5.9)                                                                                                                                                                                              | 0.67 (0.20-2.21)        | 0.91 (0.27-3.07)        | 50 (2.0)   | 0.91 (0.11-7.43) | 1.15 (0.14-9.54) | 49 (8.2)   | 0.94 (0.33-2.69)        | 1.30 (0.44-3.81)        |
| 35 |                            |                                                                                                                                                                                                       |                         |                         |            |                  |                  |            |                         |                         |
| 36 | <b>518</b>                 | Model 1, adjusted for age and sex; Model 2, adjusted for age, sex, educational level and length of stay; Abbreviations: CI, confidence interval; ACR, albumin creatinine ratio; eGFR, estimated       |                         |                         |            |                  |                  |            |                         |                         |
| 37 | <b>519</b>                 | glomerular filtration rate; CKD, chronic kidney disease; OR, odds ratio, n= total number of Ghanaians living in Amsterdam, Berlin and London among the various levels of PS constructs; %, proportion |                         |                         |            |                  |                  |            |                         |                         |
| 38 | <b>520</b>                 | of individuals with CKD among the various levels of PS constructs in Europe ***; no case of CKD and therefore odds ratios were not calculated.                                                        |                         |                         |            |                  |                  |            |                         |                         |
| 39 |                            |                                                                                                                                                                                                       |                         |                         |            |                  |                  |            |                         |                         |
| 40 |                            |                                                                                                                                                                                                       |                         |                         |            |                  |                  |            |                         |                         |
| 41 |                            |                                                                                                                                                                                                       |                         |                         |            |                  |                  |            |                         |                         |
| 42 |                            |                                                                                                                                                                                                       |                         |                         |            |                  |                  |            |                         |                         |
| 43 |                            |                                                                                                                                                                                                       |                         |                         |            |                  |                  |            |                         |                         |
| 44 |                            |                                                                                                                                                                                                       |                         |                         |            |                  |                  |            |                         |                         |
| 45 |                            |                                                                                                                                                                                                       |                         |                         |            |                  |                  |            |                         |                         |
| 46 |                            |                                                                                                                                                                                                       |                         |                         |            |                  |                  |            |                         |                         |
| 47 |                            |                                                                                                                                                                                                       |                         |                         |            |                  |                  |            |                         |                         |

## 521 **Discussion**

### 522 **Key findings**

523 Whereas there was an association between those who have experienced some stress at home/work and  
524 reduced eGFR among Ghanaians living in Europe, we did not find any association between PS and CKD  
525 among Ghanaians living in rural and urban Ghana and their peers in Europe. Also, PS was not associated  
526 with CKD for those living in rural and urban Ghana and neither for those living in the three European cities.  
527 However, there was an association between stress at work/home and albuminuria and CKD risk among  
528 Ghanaians living in Berlin. Further adjustment for conventional risk factors of CKD yielded similar results.

### 531 **Discussion of key findings**

#### 532 **Association between PS and CKD in Ghana**

533 Our study did not find any association between any of the four constructs of PS and prevalence of CKD  
534 (albuminuria, reduced eGFR and CKD risk) among Ghanaians living in rural and urban Ghana. Our findings  
535 are however in contrast with earlier studies which reported positive associations between PS and prevalent  
536 of CKD<sup>28 31 53</sup>. Other studies have hypothesised that the influence of PS on CKD may be important in only  
537 those with hypertension and diabetes and that PS may mediate or moderate the association between renal  
538 functioning and lifestyle behaviours such as smoking and physical activity<sup>33</sup>. For example, they argue that  
539 stress enhances Sympathetic Nervous System (SNS) activity to increase glucocorticoid secretion and  
540 inflammatory cytokines, which heavily contribute to hypertension, diabetes and vascular disease, which are  
541 major risk factors of CKD incidence and prevalence<sup>54</sup>. The lack of association between PS and CKD in  
542 this present study is unclear due to lack of literature on the association between PS and CKD prevalence  
543 particularly in rural and urban populations. Worth noting, however, is the presence of rich family support  
544 systems in the Ghanaian context especially in rural Ghana, which may help individuals with CKD to cope  
545 with PS thereby minimizing its effect. For example, patients with limited social networks and low social  
546 support have been shown to have augmented risk of morbidity and mortality<sup>55-57</sup>. Specifically, there is  
547 evidence that positive social support is a protective factor for persons dealing with long-term disease  
548 conditions<sup>58</sup>. Other studies have reported a protective relationship between social networks, emotionally  
549 supportive relationship and threats to physiological and psychosocial health<sup>59</sup>.

#### 552 **Association between PS and CKD Amsterdam, Berlin and London**

553 Literature on the association between PS and CKD prevalence among migrants is scant and absent in most  
554 European populations. The lack of positive association between PS and CKD in our study is consistent with

1  
2  
3 558 recent studies conducted among African Americans<sup>31 33</sup> and other populations<sup>32 60</sup>. Specifically, a recent  
4 559 study using data from the Jackson Heart Study, which comprised of extensive constructs of psychosocial  
5 560 variables reported that greater life stressors were associated with lower prevalence of CKD at baseline<sup>31</sup>.  
6  
7 561 Several studies in other parts of the world have reported a positive relationship between higher prevalence  
8  
9 562 of stressors and CKD risk<sup>27 28</sup>, although the study findings have been inconsistent. Whereas some did not  
10  
11 563 find any associations among African Americans<sup>31</sup> others found associations in other populations. Even  
12  
13 564 among those who found some associations the directions differed<sup>28</sup>. Reasons for the lack of association  
14  
15 565 observed in our study among migrants are not fully understood but may reflect the real world situation.  
16  
17 566 First, migrants from Ghana practice both nuclear and extended family support system as their peers living  
18  
19 567 in rural and urban, this practice may mitigate the impact of stressors such as unemployment, death of a love  
20  
21 568 one, discrimination, etc. They also belong to several religious organisations such as churches, which  
22  
23 569 provide similar support systems against stressors. Moreover, there are several associations of the various  
24  
25 570 ethnic groups (Akan, Ga and Ewe) providing such support when the need arises. These systems provide  
26  
27 571 both instrumental and/or emotional social support<sup>61</sup>. These assertions are supported by several studies.  
28  
29 572 Specifically, these studies have shown that social support positively affect health outcomes through  
30  
31 573 mechanisms such as increased patient compliance with therapies, decreased levels of depressive affect,  
32  
33 574 direct physiologic effects on the immune system and improved perception of quality of life<sup>58 59</sup>. The lack  
34  
35 575 of association observed in this study may also be attributed to other mechanisms, which influence the  
36  
37 576 associations between PS and CKD. Another reason for the lack of association between PS and CKD in this  
38  
39 577 study could be the cross-sectional analysis of our study. The association between PS and CKD has been  
40  
41 578 shown to be cumulative and builds over substantial period of time<sup>62</sup>. To effectively evaluate this,  
42  
43 579 longitudinal study design is required. This suggests the needs for more longitudinal studies in future  
44  
45 580 research in assessing the associations between PS and CKD outcomes<sup>62 63</sup>.

581

582

### 583 **Strength and limitation**

584

585 Our study is the first to use all four robust constructs of PS to determine association between PS and CKD.

586 This gave our study a more robust definition of PS compared to other similar studies. The use of all three

587 definitions of CKD per KDIGO guidelines also provided a broader definition of CKD and allowed

588 comparison between different geographical regions. The use of a homogenous population of Ghanaians and

589 standardized protocols and diagnostic criteria in this study also provided a novel opportunity to compare

590 Ghanaians living in rural and urban Ghana and their compatriots living in Europe. There are limitations to

591 our study. The effect of PS on CKD has been reported to be cumulative and takes a long period of time,

592 therefore the use of cross-sectional design prevented us from determining the longitudinal and cumulative

1  
2  
3 593 effect of repeated exposure to PS among the two populations. PS is captured and experienced in different  
4 594 magnitude across different populations. We were unable to ascertain if PS as defined in this study was  
5 595 adequately captured among Ghanaians living in rural and urban Ghana.  
6  
7

8 596

**597 Conclusion**

9 598

10 599 Generally, our study shows no associations between stress as indicated by four PS indicators and prevalence  
11 600 of CKD. Consequently, there is the need to explore other factors that may be responsible for the observed  
12 601 differences in the prevalence of CKD among Ghanaians living in rural and urban Ghana and their peers  
13 602 living in Europe.  
14

**603 Acknowledgement**

15  
16  
17  
18  
19 604 The authors are very grateful to the research assistants, interviewers and other staff of the five research  
20 605 locations who took part in gathering the data and the Ghanaian volunteers in all the participating RODAM  
21 606 sites. We gratefully acknowledge the advisory board members for their valuable support in shaping the  
22 607 RODAM study methods and the Academic Medical Centre Biobank for their support in biobank  
23 608 management and high-quality storage of collected samples.  
24  
25  
26

27 609

28 610

**611 Contributors**

29  
30  
31 612 My co-authors have all contributed substantially to this manuscript and approve of this submission.  
32 613 Research idea and study design: DNA, CA, KS, DA, EB, KM, JA; data acquisition and curation:  
33 614 DNA, CA, EB, KM, data analysis/interpretation: DNA, CA, KS, DA, EB, KM, LS, JA, EOD,  
34 615 KKG, FPM, MBS, ID, JS, SB; statistical analysis: DNA, CA, KS. DNA, CA, KS, DA, EB, KM,  
35 616 LS, JA, EOD, KKG, FPM, MBS, ID, JS, SB; contributed important intellectual content during  
36 617 manuscript drafting or revision and accepts accountability for the overall work by ensuring that  
37 618 questions pertaining to the accuracy or integrity of any portion of the work are appropriately  
38 619 investigated and resolved. DNA and CA takes responsibility that this study has been reported  
39 620 honestly, accurately, and transparently; that no important aspects of the study have been omitted;  
40 621 and that any discrepancies from the study as planned have been explained.  
41  
42  
43  
44

45 622

**623 Funding**

46 624

47 625 This work was supported by the European Commission under the Framework Programme (Grant Number:  
48 626 278901). The funders had no role in study design, data collection and analysis, decision to publish, or  
49  
50  
51  
52  
53  
54  
55  
56  
57  
58  
59

1  
2  
3 627 preparation of the manuscript. The Wellcome Trust supported Professor Smeeth's contribution, grant  
4  
5 628 number WT082178. Professor Joachim Spranger was supported by the DZHK (German Center for  
6  
7 629 cardiovascular research) and the Berlin Institute of Health (BIH).  
8  
9

10 **Competing interest:** I have communicated with all my co-authors and obtained their full  
11 disclosures. My co-authors and I declare no conflicts of interest.  
12  
13

14 **Patient Consent:** None declared  
15

16 634  
17 **Ethics approval:** IRBs at each participating site.  
18

19 **Data sharing statement:** Data are available from the RODAM research cohort, a third party. Dr.  
20 Eric Beune affiliated with the RODAM research cohort and a co-author of this paper in accordance  
21 with the RODAM requirements for collaboration. Dr. Beune is the Data Collection Coordinator of  
22 RODAM and may be contacted with further questions (e.j.beune@amc.uva.nl). Additionally,  
23 researchers interested in further collaboration with RODAM may see the following URL:  
24 <http://www.rod-am.eu/>  
25  
26  
27  
28  
29  
30  
31  
32  
33  
34  
35  
36  
37  
38  
39  
40  
41  
42  
43  
44  
45  
46  
47  
48  
49  
50  
51  
52  
53  
54  
55  
56  
57  
58  
59  
60



**References**

1. Weisbord SD. Symptoms and their correlates in chronic kidney disease. *Adv Chronic Kidney Dis* 2007;14(4):319-27.
2. Correa-Rotter R, Naicker S, Katz IJ, et al. Demographic and epidemiologic transition in the developing world: role of albuminuria in the early diagnosis and prevention of renal and cardiovascular disease. *Kidney Int* 2004;66:S32-S37.
3. Lozano R, Naghavi M, Foreman K, et al. Global and regional mortality from 235 causes of death for 20 age groups in 1990 and 2010: a systematic analysis for the Global Burden of Disease Study 2010. *The lancet* 2012;380(9859):2095-128.
4. Katz IJ, Gerntholtz T, Naicker S. Africa and nephrology: the forgotten continent. *Nephron Clinical Practice* 2011;117(4):320-27.
5. Bruce MA, Beech BM, Sims M, et al. Social environmental stressors, psychological factors, and kidney disease. *J Investig Med* 2009;57(4):583-89.
6. Osafo C, Mate-Kole M, Affram K, et al. Prevalence of chronic kidney disease in hypertensive patients in Ghana. *Ren Fail* 2011;33(4):388-92.
7. Ojo A. Addressing the global burden of chronic kidney disease through clinical and translational research. *Trans Am Clin Climatol Assoc* 2014;125:229.
8. Norris K, Nissenson AR. Race, gender, and socioeconomic disparities in CKD in the United States. *J Am Soc Nephrol* 2008;19(7):1261-70.
9. Volkova N, McClellan W, Klein M, et al. Neighborhood poverty and racial differences in ESRD incidence. *J Am Soc Nephrol* 2008;19(2):356-64.
10. Shoham DA, Vupputuri S, Roux AVD, et al. Kidney disease in life-course socioeconomic context: the Atherosclerosis Risk in Communities (ARIC) Study. *Am J Kidney Dis* 2007;49(2):217-26.
11. Tarver-Carr ME, Powe NR, Eberhardt MS, et al. Excess risk of chronic kidney disease among African-American versus white subjects in the United States: a population-based study of potential explanatory factors. *J Am Soc Nephrol* 2002;13(9):2363-70.
12. Adjei DN, Stronks K, Adu D, et al. Chronic kidney disease burden among African migrants in three European countries and in urban and rural Ghana: the RODAM cross-sectional study. *Nephrology Dialysis Transplantation* 2018
13. Adjei DN, Stronks K, Adu D, et al. Relationship between educational and occupational levels, and Chronic Kidney Disease in a multi-ethnic sample-The HELIUS study. *PLoS One* 2017;12(11):e0186460.
14. Fremont A, Bird CE. Social and psychological factors, physiological processes, and physical health. 2000
15. Krantz DS, McCeney MK. Effects of psychological and social factors on organic disease: a critical assessment of research on coronary heart disease. *Annu Rev Psychol* 2002;53(1):341-69.
16. Cukor D, Fruchter Y, Ver Halen N, et al. A preliminary investigation of depression and kidney functioning in patients with chronic kidney disease. *Nephron Clinical practice* 2012;122(3-4):139-45.
17. Davidson K, Jonas BS, Dixon KE, et al. Do depression symptoms predict early hypertension incidence in young adults in the CARDIA study? *Arch Intern Med* 2000;160(10):1495-500.

- 1  
2  
3 708 18. Amerena J, Julius S. The role of the autonomic nervous system in hypertension. *Hypertens*  
4 709 *Res* 1995;18(2):99-110.
- 5 710 19. Calhoun DA, Mutinga ML. Race, family history of hypertension, and sympathetic response to  
6 711 cold pressor testing. *Blood Press* 1997;6(4):209-13.
- 7 712 20. Dibona GF. Neural control of the kidney: past, present, and future. *Hypertension*  
8 713 2003;41(3):621-24.
- 9 714 21. Auchincloss AH, Diez Roux AV, Brown DG, et al. Association of insulin resistance with distance  
10 715 to wealthy areas: the multi-ethnic study of atherosclerosis. *Am J Epidemiol*  
11 716 2006;165(4):389-97.
- 12 717 22. Bruce MA, Sims M, Miller S, et al. One size fits all? Race, gender and body mass index among  
13 718 US adults. *J Natl Med Assoc* 2007;99(10):1152.
- 14 719 23. McEwen BS. Protective and damaging effects of stress mediators. *N Engl J Med*  
15 720 1998;338(3):171-79.
- 16 721 24. Cohen S, Herbert TB. Health psychology: Psychological factors and physical disease from the  
17 722 perspective of human psychoneuroimmunology. *Annu Rev Psychol* 1996;47(1):113-42.
- 18 723 25. Barker D. Fetal origins of coronary heart disease. *Br Heart J* 1993;69(3):195.
- 19 724 26. Phillips DI, Jones A, Goulden PA. Birth weight, stress, and the metabolic syndrome in adult  
20 725 life. *Ann N Y Acad Sci* 2006;1083(1):28-36.
- 21 726 27. Kim JW, Moon SJ, Kim HJ, et al. Relationship between Chronic Kidney Disease and Depression  
22 727 in Elderly Koreans Using the 2013 Korea National Health and Nutrition Examination  
23 728 Survey Data. *Korean journal of family medicine* 2017;38(3):156-62.
- 24 729 28. Loosman WL, Rottier MA, Honig A, et al. Association of depressive and anxiety symptoms  
25 730 with adverse events in Dutch chronic kidney disease patients: a prospective cohort study.  
26 731 *BMC Nephrol* 2015;16(1):155.
- 27 732 29. Novak M, Mucsi I, Mendelssohn D. Screening for depression: only one piece of the puzzle.  
28 733 *Nephrology Dialysis Transplantation* 2013;28(6):1336-40.
- 29 734 30. McKercher CM, Venn AJ, Blizzard L, et al. Psychosocial factors in adults with chronic kidney  
30 735 disease: characteristics of pilot participants in the Tasmanian Chronic Kidney Disease  
31 736 study. *BMC Nephrol* 2013;14(1):83.
- 32 737 31. Lunyera J, Davenport CA, Bhavsar NA, et al. Nondepressive Psychosocial Factors and CKD  
33 738 Outcomes in Black Americans. *Clin J Am Soc Nephrol* 2018:CJN. 06430617.
- 34 739 32. Annor FB, Masyn KE, Okosun IS, et al. Psychosocial stress and changes in estimated glomerular  
35 740 filtration rate among adults with diabetes mellitus. *Kidney research and clinical practice*  
36 741 2015;34(3):146-53.
- 37 742 33. Gholson GK, Mwendwa DT, Wright RS, et al. The Combined Influence of Psychological Factors  
38 743 on Biomarkers of Renal Functioning in African Americans. *Ethn Dis* 2015;25(2):117.
- 39 744 34. Kaur M, Kaur A, Saggu A, et al. Comparative study on psychosocial stresses among urban and  
40 745 rural geriatric population in selected areas of district Ludhiana (Punjab), 2006. *Nursing*  
41 746 *and Midwifery Research* 2007;3(2)
- 42 747 35. Agyemang C, Beune E, Meeks K, et al. Rationale and cross-sectional study design of the  
43 748 Research on Obesity and type 2 Diabetes among African Migrants: the RODAM study. *BMJ*  
44 749 *open* 2015;4(3):e004877.
- 45 750 36. Agyemang C, Snijder MB, Adjei DN, et al. Ethnic Disparities in CKD in the Netherlands: The  
46 751 Healthy Life in an Urban Setting (HELIUS) Study. *Am J Kidney Dis* 2016;67(3):391-99.

- 1  
2  
3 752 37. Peek ME, Nunez-Smith M, Drum M, et al. Adapting the everyday discrimination scale to  
4 753 medical settings: reliability and validity testing in a sample of African American patients.  
5 754 *Ethn Dis* 2011;21(4):502.
- 7 755 38. Pérez DJ, Fortuna L, Alegria M. Prevalence and correlates of everyday discrimination among  
8 756 US Latinos. *J Community Psychol* 2008;36(4):421-33.
- 9 757 39. Ikram UZ, Snijder MB, Fassaert TJ, et al. The contribution of perceived ethnic discrimination  
10 758 to the prevalence of depression. *The European Journal of Public Health* 2014;25(2):243-  
12 759 48.
- 13 760 40. Rosengren A, Hawken S, Ôunpuu S, et al. Association of psychosocial risk factors with risk of  
14 761 acute myocardial infarction in 11 119 cases and 13 648 controls from 52 countries (the  
15 762 INTERHEART study): case-control study. *The Lancet* 2004;364(9438):953-62.
- 17 763 41. Rosmalen J, Bos E, De Jonge P. Validation of the Long-term Difficulties Inventory (LDI) and the  
18 764 List of Threatening Experiences (LTE) as measures of stress in epidemiological population-  
19 765 based cohort studies. *Psychol Med* 2012;42(12):2599-608.
- 20 766 42. Brugha T, Bebbington P, Tennant C, et al. The List of Threatening Experiences: a subset of 12  
21 767 life event categories with considerable long-term contextual threat. *Psychol Med*  
23 768 1985;15(1):189-94.
- 24 769 43. Kroenke K, Spitzer RL, Williams JB. The phq-9. *J Gen Intern Med* 2001;16(9):606-13.
- 25 770 44. Association AD. Standards of Medical Care in Diabetes—2014. *Diabetes Care* 2014; 37 (Suppl.  
26 771 1): S14–S80. Diagnosis and Classification of Diabetes Mellitus. *Diabetes Care* 2014; 37  
27 772 (Suppl. 1): S81–S90. *Diabetes Care* 2014;37(3):887-87.
- 29 773 45. Stevens LA, Schmid CH, Greene T, et al. Comparative performance of the CKD Epidemiology  
30 774 Collaboration (CKD-EPI) and the Modification of Diet in Renal Disease (MDRD) Study  
31 775 equations for estimating GFR levels above 60 mL/min/1.73 m<sup>2</sup>. *Am J Kidney Dis*  
32 776 2010;56(3):486-95.
- 34 777 46. Kellum JA, Lameire N, Aspelin P, et al. Kidney disease: improving global outcomes (KDIGO)  
35 778 acute kidney injury work group. KDIGO clinical practice guideline for acute kidney injury.  
36 779 *Kidney international supplements* 2012;2(1):1-138.
- 37 780 47. KDIGO G. Work Group. KDIGO clinical practice guideline for glomerulonephritis. *Kidney inter,*  
38 781 *Suppl* 2012;2:139-274.
- 40 782 48. Rivera B, Casal B, Currais L. Length of stay and mental health of the immigrant population in  
41 783 Spain: Evidence of the healthy immigrant effect. *Applied Economics* 2015;47(19):1972-82.
- 42 784 49. Collins AJ, Foley RN, Herzog C, et al. US Renal Data System 2010 Annual Data Report. *American*  
43 785 *journal of kidney diseases: the official journal of the National Kidney Foundation*  
44 786 2011;57(1 Suppl 1):A8, e1.
- 46 787 50. Fox CS, Larson MG, Leip EP, et al. Predictors of new-onset kidney disease in a community-  
47 788 based population. *JAMA* 2004;291(7):844-50.
- 48 789 51. Banks J, Marmot M, Oldfield Z, et al. Disease and disadvantage in the United States and in  
49 790 England. *JAMA* 2006;295(17):2037-45.
- 51 791 52. Levin A, Stevens L, McCullough PA. Cardiovascular disease and the kidney: Tracking a killer in  
52 792 chronic kidney disease. *Postgrad Med* 2002;111(4):53-60.
- 53 793 53. Tsai Y-C, Chiu Y-W, Hung C-C, et al. Association of symptoms of depression with progression  
54 794 of CKD. *Am J Kidney Dis* 2012;60(1):54-61.

- 1  
2  
3 795 54. Bruce MA, Griffith DM, Thorpe RJ. Stress and the kidney. *Adv Chronic Kidney Dis*  
4 796 2015;22(1):46-53.  
5  
6 797 55. Brummett BH, Barefoot JC, Siegler IC, et al. Characteristics of socially isolated patients with  
7 798 coronary artery disease who are at elevated risk for mortality. *Psychosom Med*  
8 799 2001;63(2):267-72.  
9  
10 800 56. Eng PM, Rimm EB, Fitzmaurice G, et al. Social ties and change in social ties in relation to  
11 801 subsequent total and cause-specific mortality and coronary heart disease incidence in  
12 802 men. *Am J Epidemiol* 2002;155(8):700-09.  
13 803 57. Psychosocial factors in patients with chronic kidney disease: The impact of social support on  
14 804 end-stage renal disease. *Seminars in dialysis*; 2005. Wiley Online Library.  
15 805 58. Cohen SD, Sharma T, Acquaviva K, et al. Social support and chronic kidney disease: an update.  
16 806 *Adv Chronic Kidney Dis* 2007;14(4):335-44.  
17  
18 807 59. Uchino BN, Cacioppo JT, Kiecolt-Glaser JK. The relationship between social support and  
19 808 physiological processes: a review with emphasis on underlying mechanisms and  
20 809 implications for health. *Psychol Bull* 1996;119(3):488.  
21  
22 810 60. Tsurugano S, Nakao M, Takeuchi T, et al. Job stress strengthens the link between metabolic  
23 811 risk factors and renal dysfunction in adult men. *The Tohoku journal of experimental*  
24 812 *medicine* 2012;226(2):101-08.  
25 813 61. Tróccol BT. Desenvolvimento de escala para avaliação do suporte social em HIV/aids.  
26 814 *Psicologia: Teoria e Pesquisa* 2006;22(3):317-26.  
27  
28 815 62. Schneiderman N, Ironson G, Siegel SD. Stress and health: psychological, behavioral, and  
29 816 biological determinants. *Annu Rev Clin Psychol* 2005;1:607-28.  
30 817 63. McKercher C, Sanderson K, Jose MD. Psychosocial factors in people with chronic kidney  
31 818 disease prior to renal replacement therapy. *Nephrology* 2013;18(9):585-91.  
32  
33  
34  
35  
36  
37  
38  
39  
40  
41  
42  
43  
44  
45  
46  
47  
48  
49  
50  
51  
52  
53  
54  
55  
56  
57  
58  
59  
60

1  
2  
3 **840 Legend for figures**

4 841  
5 842 **Figure 1:** Prevalence of CKD risk among Ghanaians who have experienced negative life events and those who have  
6 843 not experienced any negative life events stratified by site. Definition per 2012 KDIGO (Kidney Disease: Improving  
7 844 Global Outcomes) guidelines.  
8 845

9 846 **Figure 2:** Prevalence of CKD risk among Ghanaians who have experienced discrimination and those who have not  
10 847 experienced any discrimination stratified by site. Definitions per 2012 KDIGO (Kidney Disease: Improving Global  
11 848 Outcomes) guidelines.  
12 849

13 850 **Figure 3:** Prevalence of CKD risk among Ghanaians who have experienced stress at home/work and those who have  
14 851 not experienced any stress at home/work in the past 12 months stratified by site. Definitions per 2012 KDIGO  
15 852 (Kidney Disease: Improving Global Outcomes) guidelines.  
16 853

17 854 **Figure 4:** Prevalence of CKD risk among Ghanaians who have depressive symptoms and those who do not have  
18 855 depressive symptoms stratified by site. Definitions per 2012 KDIGO (Kidney Disease: Improving Global Outcomes)  
19 856 guidelines.  
20 857

21 858

22 859

23 860

24 861

25 862

26 863

27 864

28 865

29 866

30 867

31 868

32 869

33 870

34 871

35 872

36 873

37 874

38 875

39 876

40 877

41 878

42 879

43 880

44 881

45 882

46 883

47 884

48 885

49 886

50 887

51 888

52

53

54

55

56

57

58

59

1  
2  
3 889 **Legend for Supplementary Tables**  
4 890

5 891 **S1: Association of psychosocial stressors (PS) indicators (negative life events, discrimination, stress at**  
6 892 **work/home and depression) with albuminuria, reduced eGFR and CKD risk for Ghanaians living in Ghana**  
7 893 **and those living in Europe.**  
8 894

9 895 **S2: Association of psychosocial stressors (PS) indicators (negative life events, discrimination, stress at**  
10 896 **work/home and depression) with albuminuria, reduced eGFR and CKD risk for Ghanaians living in Ghana**  
11 897 **and those living in Europe stratified by obesity status.**  
12 898

13 899 **S3: Association of psychosocial stressors (PS) indicators (negative life events, discrimination, stress at**  
14 900 **work/home and depression) with albuminuria, reduced eGFR and CKD risk for Ghanaians living in Ghana**  
15 901 **and those living in Europe stratified by diabetes status.**  
16 902

17 903 **S4: Association of psychosocial stressors (PS) indicators (negative life events, discrimination, stress at**  
18 904 **work/home and depression) with albuminuria, reduced eGFR and CKD risk for Ghanaians living in Ghana**  
19 905 **and those living in Europe stratified by hypertensive status.**  
20  
21  
22  
23  
24  
25  
26  
27  
28  
29  
30  
31  
32  
33  
34  
35  
36  
37  
38  
39  
40  
41  
42  
43  
44  
45  
46  
47  
48  
49  
50  
51  
52  
53  
54  
55  
56  
57  
58  
59  
60

1  
2  
3  
4  
5  
6  
7  
8  
9  
10  
11  
12  
13  
14  
15  
16  
17  
18  
19  
20  
21  
22  
23  
24  
25  
26  
27  
28  
29  
30  
31  
32  
33  
34  
35  
36  
37  
38  
39  
40  
41  
42  
43  
44  
45  
46  
47  
48  
49  
50  
51  
52  
53  
54  
55  
56  
57  
58  
59  
60



**Figure 1:** Prevalence of CKD risk among Ghanaians who have experienced negative life events and those who have not experienced any negative life events stratified by site. Definition per 2012 KDIGO (Kidney Disease: Improving Global Outcomes) guidelines.

Figure 1: Prevalence of CKD risk among Ghanaians who have experienced negative life events and those who have not experienced any negative life events stratified by site. Definition per 2012 KDIGO (Kidney Disease: Improving Global Outcomes) guidelines.

215x279mm (300 x 300 DPI)



1  
2  
3  
4  
5  
6  
7  
8  
9  
10  
11  
12  
13  
14  
15  
16  
17  
18  
19  
20  
21  
22  
23  
24  
25  
26  
27  
28  
29  
30  
31  
32  
33  
34  
35  
36  
37  
38  
39  
40  
41  
42  
43  
44  
45  
46  
47  
48  
49  
50  
51  
52  
53  
54  
55  
56  
57  
58  
59  
60



**Figure 2:** Prevalence of CKD risk among Ghanaians who have experienced discrimination and those who have not experienced any discrimination stratified by site. Definitions per 2012 KDIGO (Kidney Disease: Improving Global Outcomes) guidelines.

Figure 2: Prevalence of CKD risk among Ghanaians who have experienced discrimination and those who have not experienced any discrimination stratified by site. Definitions per 2012 KDIGO (Kidney Disease: Improving Global Outcomes) guidelines.

215x279mm (300 x 300 DPI)



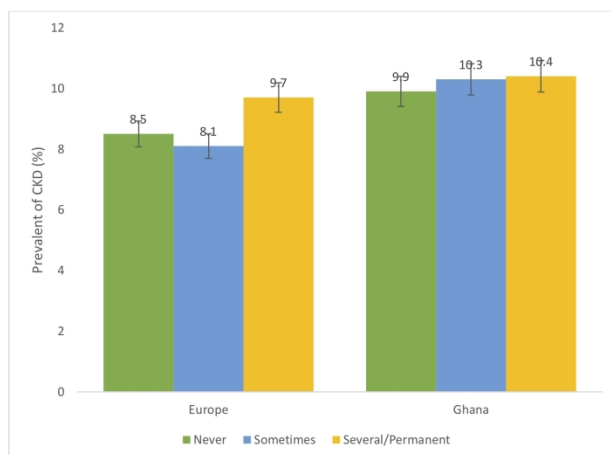

**Figure 3:** Prevalence of CKD risk among Ghanaians who have experienced stress at home/work and those who have not experienced any stress at home/work in the past 12 months stratified by site. Definitions per 2012 KDIGO (Kidney Disease: Improving Global Outcomes) guidelines.

Figure 3: Prevalence of CKD risk among Ghanaians who have experienced stress at home/work and those who have not experienced any stress at home/work in the past 12 months stratified by site. Definitions per 2012 KDIGO (Kidney Disease: Improving Global Outcomes) guidelines.

215x279mm (300 x 300 DPI)

1  
2  
3  
4  
5  
6  
7  
8  
9  
10  
11  
12  
13  
14  
15  
16  
17  
18  
19  
20  
21  
22  
23  
24  
25  
26  
27  
28  
29  
30  
31  
32  
33  
34  
35  
36  
37  
38  
39  
40  
41  
42  
43  
44  
45  
46  
47  
48  
49  
50  
51  
52  
53  
54  
55  
56  
57  
58  
59  
60



**Figure 4:** Prevalence of CKD risk among Ghanaians who have depressive symptoms and those who do not have depressive symptoms stratified by site. Definitions per 2012 KDIGO (Kidney Disease: Improving Global Outcomes) guidelines.

Figure 4: Prevalence of CKD risk among Ghanaians who have depressive symptoms and those who do not have depressive symptoms stratified by site. Definitions per 2012 KDIGO (Kidney Disease: Improving Global Outcomes) guidelines

215x279mm (300 x 300 DPI)

Supplementary Tables

S1: Association of psychosocial stressors (PS) indicators (negative life events, discrimination, stress at work/home and depression) with albuminuria, reduced eGFR and CKD risk for Ghanaians living in Ghana and those living in Europe

|                            | Albuminuria (ACR ≥ 3 mg/mmol) |                  | eGFR < 60 mL/min/1.73 m2 |                  | High to very high CKD risk (KDIGO, 2012) |                  |
|----------------------------|-------------------------------|------------------|--------------------------|------------------|------------------------------------------|------------------|
|                            | OR (95% CI)                   |                  | OR (95% CI)              |                  | OR (95% CI)                              |                  |
|                            | n (%)                         | Model 3          | n (%)                    | Model 3          | n cases (%)                              | Model 3          |
| <b>Negative events</b>     |                               |                  |                          |                  |                                          |                  |
| <b>Europe</b>              |                               |                  |                          |                  |                                          |                  |
| No                         | 1128 (8.2)                    | 1.00 (Reference) | 1106 (2.6)               | 1.00 (Reference) | 1090 (8.5)                               | 1.00 (Reference) |
| Yes                        | 1615 (8.4)                    | 0.95 (0.70-1.30) | 1587 (2.5)               | 0.77 (0.44-1.37) | 1557 (8.6)                               | 0.92 (0.67-1.26) |
| <b>Ghana</b>               |                               |                  |                          |                  |                                          |                  |
| No                         | 732 (10.4)                    | 1.00 (Reference) | 736 (4.5)                | 1.00 (Reference) | 732 (10.9)                               | 1.00 (Reference) |
| Yes                        | 1595 (9.2)                    | 0.79 (0.58-1.07) | 1601 (3.4)               | 0.69 (0.43-1.09) | 1590 (9.9)                               | 0.79 (0.58-1.06) |
| <b>Discrimination</b>      |                               |                  |                          |                  |                                          |                  |
| <b>Europe</b>              |                               |                  |                          |                  |                                          |                  |
| No                         | 1899 (8.5)                    | 1.00 (Reference) | 1867 (2.6)               | 1.00 (Reference) | 1832 (8.9)                               | 1.00 (Reference) |
| Yes                        | 810 (7.4)                     | 0.87 (0.61-1.21) | 791 (2.2)                | 0.87 (0.45-1.65) | 782 (7.3)                                | 0.79 (0.55-1.12) |
| <b>Ghana</b>               |                               |                  |                          |                  |                                          |                  |
| No                         | 2034 (10.0)                   | 1.00 (Reference) | 2047 (3.9)               | 1.00 (Reference) | 2031 (10.6)                              | 1.00 (Reference) |
| Yes                        | 104 (7.7)                     | 0.92 (0.43-1.98) | 104 (1.9)                | 0.65 (0.15-2.79) | 104 (6.7)                                | 0.74 (0.33-1.66) |
| <b>Stress at home/work</b> |                               |                  |                          |                  |                                          |                  |
| <b>Europe</b>              |                               |                  |                          |                  |                                          |                  |
| Never                      | 1330 (8.2)                    | 1.00 (Reference) | 1305 (3.4)               | 1.00 (Reference) | 1282 (8.5)                               | 1.00 (Reference) |
| Some stress                | 1002 (7.9)                    | 1.01 (0.72-1.41) | 984 (1.4)                | 0.51 (0.25-1.04) | 968 (8.1)                                | 1.01 (0.72-1.42) |
| Several/Permanent stresses | 397 (9.1)                     | 1.00 (0.64-1.59) | 390 (2.3)                | 0.91 (0.40-2.03) | 383 (9.7)                                | 1.15 (0.74-1.79) |
| <b>Ghana</b>               |                               |                  |                          |                  |                                          |                  |

|                            |            |                  |            |                  |             |                  |
|----------------------------|------------|------------------|------------|------------------|-------------|------------------|
| Never                      | 682 (10.3) | 1.00 (Reference) | 688 (3.3)  | 1.00 (Reference) | 682 (9.9)   | 1.00 (Reference) |
| Some stress                | 1279 (9.5) | 0.78 (0.56-1.09) | 1279 (3.9) | 1.14 (0.67-1.93) | 1274 (10.3) | 0.93 (0.67-1.29) |
| Several/Permanent stresses | 365 (8.5)  | 0.70 (0.43-1.13) | 369 (4.1)  | 1.32 (0.65-1.68) | 365 (10.4)  | 0.97 (0.62-1.52) |
| <b>Depressive symptoms</b> |            |                  |            |                  |             |                  |
| <b>Europe</b>              |            |                  |            |                  |             |                  |
| No                         | 2505 (8.5) | 1.00 (Reference) | 2457 (2.7) | 1.00 (Reference) | 2416 (8.7)  | 1.00 (Reference) |
| Yes                        | 206 (6.3)  | 0.65 (0.33-1.28) | 202 (1.5)  | 0.94 (0.28-3.14) | 199 (7.1)   | 0.78 (0.41-1.47) |
| <b>Ghana</b>               |            |                  |            |                  |             |                  |
| No                         | 2212 (9.9) | 1.00 (Reference) | 2222 (3.8) | 1.00 (Reference) | 2207 (10.4) | 1.00 (Reference) |
| Yes                        | 114 (5.3)  | 0.41 (0.16-1.04) | 114 (2.6)  | 0.58 (0.17-1.95) | 114 (7.9)   | 0.62 (0.28-1.31) |

Model 3, adjusted for age, sex educational level, hypertension, diabetes, hypercholesterolemia, BMI, physical activity and smoking; Abbreviations: CI, confidence interval; ACR, albumin creatinine ratio; eGFR, estimated glomerular filtration rate; CKD, chronic kidney disease; OR, odds ratio, n= total number of Ghanaians living in Ghana and Europe among the various levels of PS constructs; %, proportion of individuals with CKD among the various levels of PS constructs in Ghana and Europe.

1  
2  
3  
4  
5  
6  
7  
8  
9  
10  
11  
12  
13  
14  
15  
16  
17  
18  
19  
20  
21  
22  
23  
24  
25  
26  
27  
28  
29  
30  
31  
32  
33  
34  
35  
36  
37  
38  
39  
40  
41  
42  
43  
44  
45  
46  
47

**S2: Association of psychosocial stressors (PS) indicators (negative life events, discrimination, stress at work/home and depression) with albuminuria, reduced eGFR and CKD risk for Ghanaians living in Ghana and those living in Europe stratified by obesity status**

|                         | Albuminuria (ACR ≥ 3 mg/mmol) |                  |                  | eGFR < 60 mL/min/1.73 m2 |                  |                  | High to very high CKD risk (KDIGO, 2012) |                         |                         |
|-------------------------|-------------------------------|------------------|------------------|--------------------------|------------------|------------------|------------------------------------------|-------------------------|-------------------------|
|                         | n (%)                         | OR (95% CI)      |                  | n (%)                    | OR (95% CI)      |                  | n cases (%)                              | OR (95% CI)             |                         |
|                         |                               | Model 1          | Model 2          |                          | Model 1          | Model 2          |                                          | Model 1                 | Model 2                 |
| <b>Negative events</b>  |                               |                  |                  |                          |                  |                  |                                          |                         |                         |
| <b>Europe/Not obese</b> |                               |                  |                  |                          |                  |                  |                                          |                         |                         |
| No                      | 736 (7.4)                     | 1.00 (Reference) | 1.00 (Reference) | 729 (2.5)                | 1.00 (Reference) | 1.00 (Reference) | 719 (8.5)                                | 1.00 (Reference)        | 1.00 (Reference)        |
| Yes                     | 1003 (7.7)                    | 0.98 (0.67-1.40) | 0.99 (0.69-1.43) | 992 (2.0)                | 0.77 (0.40-1.48) | 0.71 (0.36-1.42) | 971 (7.9)                                | 0.91 (0.64-1.29)        | 0.89 (0.62-1.29)        |
| <b>Europe/Obese</b>     |                               |                  |                  |                          |                  |                  |                                          |                         |                         |
| No                      | 390 (9.2)                     | 1.00 (Reference) | 1.00 (Reference) | 375 (2.9)                | 1.00 (Reference) | 1.00 (Reference) | 369 (8.7)                                | 1.00 (Reference)        | 1.00 (Reference)        |
| Yes                     | 607 (9.6)                     | 1.05 (0.67-1.63) | 1.14 (0.72-1.82) | 590 (3.2)                | 0.97 (0.44-2.11) | 1.01 (0.44-2.26) | 581 (9.6)                                | 1.15 (0.73-1.82)        | 1.15 (0.71-1.85)        |
| <b>Ghana/Not obese</b>  |                               |                  |                  |                          |                  |                  |                                          |                         |                         |
| No                      | 588 (9.5)                     | 1.00 (Reference) | 1.00 (Reference) | 592 (4.7)                | 1.00 (Reference) | 1.00 (Reference) | 588 (10.0)                               | 1.00 (Reference)        | 1.00 (Reference)        |
| Yes                     | 1324 (8.5)                    | 0.86 (0.61-1.21) | 0.83 (0.59-1.17) | 1331 (3.4)               | 0.64 (0.39-1.05) | 0.65 (0.39-1.83) | 1321 (9.0)                               | 0.86 (0.61-1.20)        | 0.84 (0.60-1.18)        |
| <b>Ghana/Obese</b>      |                               |                  |                  |                          |                  |                  |                                          |                         |                         |
| No                      | 144 (13.9)                    | 1.00 (Reference) | 1.00 (Reference) | 144 (3.5)                | 1.00 (Reference) | 1.00 (Reference) | 144 (14.6)                               | 1.00 (Reference)        | 1.00 (Reference)        |
| Yes                     | 268 (13.1)                    | 0.91 (0.50-1.64) | 0.91 (0.49-1.65) | 267 (3.8)                | 1.04 (0.34-3.16) | 1.09 (0.35-3.37) | 266 (14.3)                               | 0.94 (0.52-1.68)        | 0.94 (0.52-1.67)        |
| <b>Discrimination</b>   |                               |                  |                  |                          |                  |                  |                                          |                         |                         |
| <b>Europe/Not obese</b> |                               |                  |                  |                          |                  |                  |                                          |                         |                         |
| No                      | 1186 (8.4)                    | 1.00 (Reference) | 1.00 (Reference) | 1172 (2.4)               | 1.00 (Reference) | 1.00 (Reference) | 1150 (9.4)                               | 1.00 (Reference)        | 1.00 (Reference)        |
| Yes                     | 538 (5.9)                     | 0.69 (0.46-1.05) | 0.71 (0.46-1.11) | 532 (1.5)                | 0.62 (0.28-1.37) | 0.57 (0.24-1.34) | 525 (5.9)                                | <b>0.63 (0.42-0.96)</b> | <b>0.63 (0.41-0.97)</b> |
| <b>Europe/Obese</b>     |                               |                  |                  |                          |                  |                  |                                          |                         |                         |
| No                      | 709 (8.7)                     | 1.00 (Reference) | 1.00 (Reference) | 691 (3.0)                | 1.00 (Reference) | 1.00 (Reference) | 678 (8.9)                                | 1.00 (Reference)        | 1.00 (Reference)        |
| Yes                     | 269 (10.0)                    | 1.14 (0.71-1.85) | 1.29 (0.78-2.12) | 256 (3.5)                | 1.15 (0.50-2.63) | 1.27 (0.54-2.99) | 254 (9.8)                                | 1.13 (0.69-1.86)        | 1.22 (0.73-2.13)        |
| <b>Ghana/Not obese</b>  |                               |                  |                  |                          |                  |                  |                                          |                         |                         |
| No                      | 1648 (9.1)                    | 1.00 (Reference) | 1.00 (Reference) | 1661 (3.9)               | 1.00 (Reference) | 1.00 (Reference) | 1646 (9.6)                               | 1.00 (Reference)        | 1.00 (Reference)        |
| Yes                     | 81 (8.6)                      | 1.06 (0.48-2.38) | 1.04 (0.47-2.32) | 81 (2.5)                 | 1.04 (0.48-2.32) | 0.86 (0.20-3.69) | 81 (7.4)                                 | 0.90 (0.38-2.12)        | 0.89 (0.38-2.11)        |
| <b>Ghana/Obese</b>      |                               |                  |                  |                          |                  |                  |                                          |                         |                         |

|    |                            |            |                  |                  |            |                  |                  |            |                  |                  |
|----|----------------------------|------------|------------------|------------------|------------|------------------|------------------|------------|------------------|------------------|
| 1  |                            |            |                  |                  |            |                  |                  |            |                  |                  |
| 2  |                            |            |                  |                  |            |                  |                  |            |                  |                  |
| 3  | No                         | 383 (13.8) | 1.00 (Reference) | 1.00 (Reference) | 383 (3.7)  | 1.00 (Reference) | 1.00 (Reference) | 382 (14.9) | 1.00 (Reference) | 1.00 (Reference) |
| 4  | Yes                        | 23 (4.4)   | 0.31 (0.04-2.36) | 0.40 (0.05-3.11) | 23 (0.0)   | **** (***_***)   | **** (***_***)   | 23 (4.4)   | 0.29 (0.04-2.22) | 0.34 (0.04-2.66) |
| 5  |                            |            |                  |                  |            |                  |                  |            |                  |                  |
| 6  | <b>Stress at</b>           |            |                  |                  |            |                  |                  |            |                  |                  |
| 7  | <b>home/work</b>           |            |                  |                  |            |                  |                  |            |                  |                  |
| 8  | <b>Europe/Not obese</b>    |            |                  |                  |            |                  |                  |            |                  |                  |
| 9  | Never                      | 855 (7.4)  | 1.00 (Reference) | 1.00 (Reference) | 847 (3.4)  | 1.00 (Reference) | 1.00 (Reference) | 831 (8.2)  | 1.00 (Reference) | 1.00 (Reference) |
| 10 | Some stress                | 629 (8.3)  | 1.16 (0.79-1.70) | 1.20 (0.81-1.79) | 627 (1.4)  | 0.52 (0.24-1.12) | 0.47 (0.21-1.07) | 615 (7.9)  | 0.98 (0.66-1.43) | 0.98 (0.65-1.46) |
| 11 | Several/Permanent stresses | 247 (6.9)  | 0.93 (0.53-1.62) | 1.15 (0.77-1.72) | 239 (2.3)  | 0.45 (0.13-1.52) | 0.49 (0.15-1.67) | 236 (9.1)  | 0.97 (0.57-1.65) | 1.04 (0.61-1.78) |
| 12 |                            |            |                  |                  |            |                  |                  |            |                  |                  |
| 13 | <b>Europe/Obese</b>        |            |                  |                  |            |                  |                  |            |                  |                  |
| 14 | Never                      | 472 (9.8)  | 1.00 (Reference) | 1.00 (Reference) | 455 (3.9)  | 1.00 (Reference) | 1.00 (Reference) | 448 (10.3) | 1.00 (Reference) | 1.00 (Reference) |
| 15 | Some stress                | 372 (7.5)  | 0.72 (0.44-1.18) | 0.79 (0.47-1.32) | 356 (1.4)  | 0.41 (0.15-1.16) | 0.43 (0.15-1.21) | 352 (9.5)  | 0.94 (0.57-1.53) | 1.05 (0.62-1.76) |
| 16 | Several/Permanent stresses | 147 (12.2) | 1.32 (0.74-2.38) | 1.31 (0.72-2.42) | 148 (4.1)  | 1.05 (0.40-2.79) | 1.09 (0.40-2.91) | 144 (8.5)  | 1.36 (0.74-2.49) | 1.41 (0.75-2.64) |
| 17 |                            |            |                  |                  |            |                  |                  |            |                  |                  |
| 18 | <b>Ghana/Not obese</b>     |            |                  |                  |            |                  |                  |            |                  |                  |
| 19 | Never                      | 537 (9.7)  | 1.00 (Reference) | 1.00 (Reference) | 542 (3.1)  | 1.00 (Reference) | 1.00 (Reference) | 537 (8.9)  | 1.00 (Reference) | 1.00 (Reference) |
| 20 | Some stress                | 1055 (8.3) | 0.79 (0.56-1.15) | 0.74 (0.52-1.07) | 1057 (3.9) | 1.16 (0.65-2.09) | 1.21 (0.67-2.18) | 1052 (9.0) | 0.92 (0.64-1.35) | 0.90 (0.62-1.32) |
| 21 | Several/permanent stresses | 319 (8.5)  | 0.81 (0.49-1.32) | 0.73 (0.44-1.20) | 323 (4.3)  | 1.34 (0.64-2.83) | 1.43 (0.67-3.04) | 319 (10.7) | 1.12 (0.69-1.79) | 1.09 (0.68-1.76) |
| 22 |                            |            |                  |                  |            |                  |                  |            |                  |                  |
| 23 | <b>Ghana/Obese</b>         |            |                  |                  |            |                  |                  |            |                  |                  |
| 24 | Never                      | 145 (12.4) | 1.00 (Reference) | 1.00 (Reference) | 146 (4.1)  | 1.00 (Reference) | 1.00 (Reference) | 145 (13.8) | 1.00 (Reference) | 1.00 (Reference) |
| 25 | Some stress                | 221 (14.9) | 1.21 (0.64-2.26) | 1.05 (0.55-1.99) | 219 (3.7)  | 0.74 (0.25-2.22) | 0.83 (0.26-2.06) | 219 (15.9) | 1.13 (0.62-2.07) | 1.02 (0.55-1.89) |
| 26 | Several/Permanent stresses | 46 (8.7)   | 0.64 (0.20-2.01) | 0.52 (0.16-1.65) | 46 (2.2)   | 0.41 (0.05-3.61) | 0.45 (0.05-4.01) | 46 (8.8)   | 0.55 (0.17-1.71) | 0.47 (0.14-1.50) |
| 27 |                            |            |                  |                  |            |                  |                  |            |                  |                  |
| 28 | <b>Depressive symptoms</b> |            |                  |                  |            |                  |                  |            |                  |                  |
| 29 | <b>Europe/Not obese</b>    |            |                  |                  |            |                  |                  |            |                  |                  |
| 30 | No                         | 1601 (7.9) | 1.00 (Reference) | 1.00 (Reference) | 1586 (2.2) | 1.00 (Reference) | 1.00 (Reference) | 1558 (8.3) | 1.00 (Reference) | 1.00 (Reference) |
| 31 | Yes                        | 121 (4.9)  | 0.59 (0.25-1.36) | 0.65 (0.27-1.48) | 117 (1.7)  | 0.79 (0.18-2.35) | 0.86 (0.21-3.80) | 115 (5.22) | 0.58 (0.25-1.35) | 0.64 (0.27-1.49) |
| 32 |                            |            |                  |                  |            |                  |                  |            |                  |                  |
| 33 | <b>Europe/Obese</b>        |            |                  |                  |            |                  |                  |            |                  |                  |
| 34 | No                         | 899 (9.7)  | 1.00 (Reference) | 1.00 (Reference) | 866 (3.4)  | 1.00 (Reference) | 1.00 (Reference) | 853 (9.4)  | 1.00 (Reference) | 1.00 (Reference) |
| 35 | Yes                        | 83 (7.2)   | 0.71 (0.29-1.67) | 0.72 (0.30-1.74) | 83 (1.2)   | 0.46 (0.06-3.52) | 0.46 (0.06-3.57) | 82 (8.5)   | 0.89 (0.40-2.01) | 0.90 (0.40-2.04) |
| 36 |                            |            |                  |                  |            |                  |                  |            |                  |                  |
| 37 |                            |            |                  |                  |            |                  |                  |            |                  |                  |
| 38 |                            |            |                  |                  |            |                  |                  |            |                  |                  |
| 39 |                            |            |                  |                  |            |                  |                  |            |                  |                  |
| 40 |                            |            |                  |                  |            |                  |                  |            |                  |                  |
| 41 |                            |            |                  |                  |            |                  |                  |            |                  |                  |
| 42 |                            |            |                  |                  |            |                  |                  |            |                  |                  |
| 43 |                            |            |                  |                  |            |                  |                  |            |                  |                  |
| 44 |                            |            |                  |                  |            |                  |                  |            |                  |                  |
| 45 |                            |            |                  |                  |            |                  |                  |            |                  |                  |
| 46 |                            |            |                  |                  |            |                  |                  |            |                  |                  |
| 47 |                            |            |                  |                  |            |                  |                  |            |                  |                  |

1  
2  
3  
4  
5  
6  
7  
8  
9  
10  
11  
12  
13  
14  
15  
16  
17  
18  
19  
20  
21  
22  
23  
24  
25  
26  
27  
28  
29  
30  
31  
32  
33  
34  
35  
36  
37  
38  
39  
40  
41  
42  
43  
44  
45  
46  
47

**Ghana/Not obese**

|     |            |                  |                  |            |                  |                  |            |                  |                  |
|-----|------------|------------------|------------------|------------|------------------|------------------|------------|------------------|------------------|
| No  | 1811 (8.9) | 1.00 (Reference) | 1.00 (Reference) | 1822 (3.9) | 1.00 (Reference) | 1.00 (Reference) | 1808 (9.4) | 1.00 (Reference) | 1.00 (Reference) |
| Yes | 100 (6.0)  | 0.57 (0.24-1.33) | 0.56 (0.24-1.32) | 100 (2.0)  | 0.38 (0.09-1.63) | 0.38 (0.09-1.63) | 100 (8.0)  | 0.69 (0.32-1.46) | 0.69 (0.32-1.47) |

**Ghana/Obese**

|     |            |                  |                  |           |                   |                  |            |                  |                  |
|-----|------------|------------------|------------------|-----------|-------------------|------------------|------------|------------------|------------------|
| No  | 398 (13.8) | 1.00 (Reference) | 1.00 (Reference) | 397 (3.5) | 1.00 (Reference)  | 1.00 (Reference) | 396 (14.7) | 1.00 (Reference) | 1.00 (Reference) |
| Yes | 14 (0.0)   | *** (****_****)  | *** (****_****)  | 14 (7.1)  | 1.76 (0.21-14.89) | 2.14 (0.25-8.78) | 14 (7.1)   | 0.42 (0.05-3.32) | 0.38 (0.05-3.07) |

Model 1, adjusted for age and sex; Model 2, adjusted for age, sex, and educational level for Ghanaians (SSA) and length of stay for those in Europe; Abbreviations: CI, confidence interval; ACR, albumin creatinine ration; eGFR, estimated glomerular filtration rate; CKD, chronic kidney disease; OR, odds ratio, n= total number of Ghanaians living in Ghana and Europe among the various levels of PS constructs; %, proportion of individuals with CKD among the various levels of PS constructs in Ghana and Europe.

For peer review only

**S3: Association of psychosocial stressors (PS) indicators (negative life events, discrimination, stress at work/home and depression) with albuminuria, reduced eGFR and CKD risk for Ghanaians living in Ghana and those living in Europe stratified by diabetes status**

|                           | Albuminuria (ACR $\geq$ 3 mg/mmol) |                  |                  | eGFR < 60 mL/min/1.73 m <sup>2</sup> |                  |                   | High to very high CKD risk (KDIGO, 2012) |                  |                  |
|---------------------------|------------------------------------|------------------|------------------|--------------------------------------|------------------|-------------------|------------------------------------------|------------------|------------------|
|                           | n (%)                              | OR (95% CI)      | Model 2          | n (%)                                | OR (95% CI)      | Model 2           | n cases (%)                              | OR (95% CI)      | Model 2          |
| <b>Negative events</b>    |                                    |                  |                  |                                      |                  |                   |                                          |                  |                  |
| <b>Europe/No diabetes</b> |                                    |                  |                  |                                      |                  |                   |                                          |                  |                  |
| No                        | 986 (8.0)                          | 1.00 (Reference) | 1.00 (Reference) | 971 (2.1)                            | 1.00 (Reference) | 1.00 (Reference)  | 957 (7.9)                                | 1.00 (Reference) | 1.00 (Reference) |
| Yes                       | 1359 (7.7)                         | 0.95 (0.70-1.29) | 0.97 (0.71-1.34) | 1340 (2.0)                           | 0.90 (0.50-1.63) | 0.90 (0.48-1.68)  | 1315 (8.1)                               | 1.01 (0.75-1.37) | 0.99 (0.72-1.36) |
| <b>Europe/Diabetes</b>    |                                    |                  |                  |                                      |                  |                   |                                          |                  |                  |
| No                        | 142 (9.9)                          | 1.00 (Reference) | 1.00 (Reference) | 135 (6.7)                            | 1.00 (Reference) | 1.00 (Reference)  | 133 (12.8)                               | 1.00 (Reference) | 1.00 (Reference) |
| Yes                       | 256 (12.5)                         | 1.28 (0.66-2.50) | 1.41 (0.71-2.82) | 247 (4.9)                            | 0.75 (0.29-1.89) | 10.68 (0.27-1.77) | 242 (11.2)                               | 0.87 (0.46-1.69) | 0.96 (0.49-1.88) |
| <b>Ghana/No diabetes</b>  |                                    |                  |                  |                                      |                  |                   |                                          |                  |                  |
| No                        | 683 (9.1)                          | 1.00 (Reference) | 1.00 (Reference) | 687 (4.1)                            | 1.00 (Reference) | 1.00 (Reference)  | 683 (9.8)                                | 1.00 (Reference) | 1.00 (Reference) |
| Yes                       | 1447 (7.7)                         | 0.84 (0.60-1.16) | 0.82 (0.59-1.14) | 1451 (3.1)                           | 0.69 (0.42-1.13) | 0.69 (0.42-1.13)  | 1442 (8.3)                               | 0.82 (0.59-1.12) | 0.80 (0.58-1.10) |
| <b>Ghana/Diabetes</b>     |                                    |                  |                  |                                      |                  |                   |                                          |                  |                  |
| No                        | 49 (28.3)                          | 1.00 (Reference) | 1.00 (Reference) | 49 (10.2)                            | 1.00 (Reference) | 1.00 (Reference)  | 49 (26.4)                                | 1.00 (Reference) | 1.00 (Reference) |
| Yes                       | 148 (24.3)                         | 0.78 (0.37-1.61) | 0.72 (0.34-1.52) | 150 (7.3)                            | 0.55 (0.16-1.81) | 0.57 (0.17-1.88)  | 148 (26.4)                               | 0.93 (0.45-1.97) | 0.90 (0.43-1.92) |
| <b>Discrimination</b>     |                                    |                  |                  |                                      |                  |                   |                                          |                  |                  |
| <b>Europe/No diabetes</b> |                                    |                  |                  |                                      |                  |                   |                                          |                  |                  |
| No                        | 1629 (7.9)                         | 1.00 (Reference) | 1.00 (Reference) | 1609 (2.2)                           | 1.00 (Reference) | 1.00 (Reference)  | 1580 (8.3)                               | 1.00 (Reference) | 1.00 (Reference) |
| Yes                       | 684 (6.7)                          | 0.85 (0.60-1.21) | 0.89 (0.62-1.28) | 669 (1.5)                            | 0.68 (0.33-1.40) | 0.69 (0.32-1.47)  | 661 (7.0)                                | 0.84 (0.59-1.20) | 0.86 (0.59-1.25) |
| <b>Europe/Diabetes</b>    |                                    |                  |                  |                                      |                  |                   |                                          |                  |                  |
| No                        | 270 (11.9)                         | 1.00 (Reference) | 1.00 (Reference) | 258 (5.4)                            | 1.00 (Reference) | 1.00 (Reference)  | 252 (13.1)                               | 1.00 (Reference) | 1.00 (Reference) |
| Yes                       | 126 (11.1)                         | 0.87 (0.44-1.71) | 0.89 (0.45-1.76) | 122 (5.7)                            | 1.29 (0.48-3.45) | 1.25 (0.46-3.37)  | 121 (9.1)                                | 0.68 (0.32-1.40) | 0.69 (0.33-1.42) |
| <b>Ghana/No diabetes</b>  |                                    |                  |                  |                                      |                  |                   |                                          |                  |                  |
| No                        | 1854 (8.4)                         | 1.00 (Reference) | 1.00 (Reference) | 1865 (3.5)                           | 1.00 (Reference) | 1.00 (Reference)  | 1851 (9.0)                               | 1.00 (Reference) | 1.00 (Reference) |
| Yes                       | 99 (8.1)                           | 1.03 (0.49-2.17) | 1.04 (0.49-2.19) | 99 (2.0)                             | 0.79 (0.19-3.33) | 0.78 (0.18-3.29)  | 99 (7.1)                                 | 0.87 (0.39-1.93) | 0.88 (0.39-1.95) |



|    |                            |            |                         |                         |            |                  |                  |            |                         |                         |
|----|----------------------------|------------|-------------------------|-------------------------|------------|------------------|------------------|------------|-------------------------|-------------------------|
| 1  |                            |            |                         |                         |            |                  |                  |            |                         |                         |
| 2  |                            |            |                         |                         |            |                  |                  |            |                         |                         |
| 3  | <b>Ghana/Diabetes</b>      |            |                         |                         |            |                  |                  |            |                         |                         |
| 4  | No                         | 180 (26.7) | 1.00 (Reference)        | 1.00 (Reference)        | 182 (7.7)  | 1.00 (Reference) | 1.00 (Reference) | 180 (27.2) | 1.00 (Reference)        | 1.00 (Reference)        |
| 5  | Yes                        | 5 (0.0)    | **** (***_***)          | 0.40 (0.05-3.11)        | 5 (0.0)    | **** (***_***)   | **** (***_***)   | 5 (0.0)    | **** (***_***)          | **** (***_***)          |
| 6  |                            |            |                         |                         |            |                  |                  |            |                         |                         |
| 7  | <b>Stress at home/work</b> |            |                         |                         |            |                  |                  |            |                         |                         |
| 8  |                            |            |                         |                         |            |                  |                  |            |                         |                         |
| 9  | <b>Europe/No diabetes</b>  |            |                         |                         |            |                  |                  |            |                         |                         |
| 10 | Never                      | 1137 (7.9) | 1.00 (Reference)        | 1.00 (Reference)        | 1127 (2.3) | 1.00 (Reference) | 1.00 (Reference) | 1102 (8.0) | 1.00 (Reference)        | 1.00 (Reference)        |
| 11 | Some stress                | 860 (7.2)  | 0.90 (0.65-1.27)        | 0.96 (0.68-1.36)        | 850 (1.2)  | 0.49 (0.24-1.02) | 0.49 (0.22-1.07) | 835 (7.4)  | 0.94 (0.67-1.31)        | 0.99 (0.69-1.41)        |
| 12 | Several/Permanent stresses | 335 (8.4)  | 1.04 (0.67-1.62)        | 1.07 (0.68-1.70)        | 327 (2.1)  | 0.84 (0.36-1.95) | 0.92 (0.39-2.17) | 322 (9.6)  | 1.20 (0.77-1.85)        | 1.28 (0.82-1.99)        |
| 13 |                            |            |                         |                         |            |                  |                  |            |                         |                         |
| 14 | <b>Europe/Diabetes</b>     |            |                         |                         |            |                  |                  |            |                         |                         |
| 15 | Never                      | 193 (9.8)  | 1.00 (Reference)        | 1.00 (Reference)        | 184 (8.2)  | 1.00 (Reference) | 1.00 (Reference) | 180 (11.7) | 1.00 (Reference)        | 1.00 (Reference)        |
| 16 | Some stress                | 142 (12.7) | 1.22 (0.61-2.45)        | 1.38 (0.67-2.81)        | 134 (3.0)  | 0.43 (0.13-1.39) | 0.40 (0.12-1.29) | 133 (12.0) | 1.04 (0.52-2.09)        | 1.13 (0.56-2.32)        |
| 17 | Several/Permanent stresses | 62 (12.9)  | 1.31 (0.54-3.16)        | 1.38 (0.56-3.41)        | 63 (3.2)   | 0.49 (0.10-2.29) | 0.46 (0.10-2.23) | 61 (9.8)   | 0.82 (0.31-2.13)        | 0.89 (0.34-2.35)        |
| 18 |                            |            |                         |                         |            |                  |                  |            |                         |                         |
| 19 | <b>Ghana/No diabetes</b>   |            |                         |                         |            |                  |                  |            |                         |                         |
| 20 | Never                      | 628 (7.8)  | 1.00 (Reference)        | 1.00 (Reference)        | 634 (2.7)  | 1.00 (Reference) | 1.00 (Reference) | 628 (7.6)  | 1.00 (Reference)        | 1.00 (Reference)        |
| 21 | Some stress                | 1163 (8.6) | 1.06 (0.74-1.51)        | 0.97 (0.67-1.39)        | 1163 (3.7) | 1.27 (0.71-2.27) | 1.32 (0.74-2.34) | 1158 (9.3) | 1.15 (0.80-1.65)        | 1.10 (0.77-1.58)        |
| 22 | Several/permanent stresses | 339 (7.4)  | 0.88 (0.53-1.46)        | 0.76 (0.46-1.27)        | 341 (3.5)  | 1.24 (0.58-2.67) | 1.35 (0.62-2.95) | 339 (8.9)  | 1.07 (0.66-1.73)        | 1.00 (0.61-1.64)        |
| 23 |                            |            |                         |                         |            |                  |                  |            |                         |                         |
| 24 | <b>Ghana/Diabetes</b>      |            |                         |                         |            |                  |                  |            |                         |                         |
| 25 | Never                      | 54 (38.9)  | 1.00 (Reference)        | 1.00 (Reference)        | 54 (11.1)  | 1.00 (Reference) | 1.00 (Reference) | 54 (37.0)  | 1.00 (Reference)        | 1.00 (Reference)        |
| 26 | Some stress                | 116 (18.9) | <b>0.37 (0.37-0.77)</b> | <b>0.35 (0.17-0.75)</b> | 116 (6.0)  | 0.47 (0.14-1.60) | 0.45 (0.12-1.55) | 116 (19.8) | <b>0.43 (0.21-0.89)</b> | <b>0.40 (0.19-0.86)</b> |
| 27 | Several/Permanent stresses | 26 (25.0)  | 0.44 (0.44-1.29)        | 0.39 (0.13-1.19)        | 28 (10.7)  | 0.65 (0.13-3.21) | 0.62 (0.12-3.23) | 26 (30.8)  | 0.69 (0.25-1.93)        | 0.64 (0.22-1.87)        |
| 28 |                            |            |                         |                         |            |                  |                  |            |                         |                         |
| 29 | <b>Depressive symptoms</b> |            |                         |                         |            |                  |                  |            |                         |                         |
| 30 |                            |            |                         |                         |            |                  |                  |            |                         |                         |
| 31 | <b>Europe/No diabetes</b>  |            |                         |                         |            |                  |                  |            |                         |                         |
| 32 | No                         | 2154 (8.0) | 1.00 (Reference)        | 1.00 (Reference)        | 2122 (2.1) | 1.00 (Reference) | 1.00 (Reference) | 2087 (8.1) | 1.00 (Reference)        | 1.00 (Reference)        |
| 33 | Yes                        | 167 (5.4)  | 0.63 (0.32-1.25)        | 0.69 (0.34-1.38)        | 163 (2.0)  | 0.65 (0.15-2.72) | 0.72 (0.17-3.04) | 161 (6.8)  | 0.58 (0.25-1.35)        | 0.86 (0.46-1.64)        |
| 34 |                            |            |                         |                         |            |                  |                  |            |                         |                         |
| 35 | <b>Europe/Diabetes</b>     |            |                         |                         |            |                  |                  |            |                         |                         |
| 36 | No                         |            |                         |                         |            |                  |                  |            |                         |                         |
| 37 | Yes                        |            |                         |                         |            |                  |                  |            |                         |                         |
| 38 |                            |            |                         |                         |            |                  |                  |            |                         |                         |
| 39 |                            |            |                         |                         |            |                  |                  |            |                         |                         |
| 40 |                            |            |                         |                         |            |                  |                  |            |                         |                         |
| 41 |                            |            |                         |                         |            |                  |                  |            |                         |                         |
| 42 |                            |            |                         |                         |            |                  |                  |            |                         |                         |
| 43 |                            |            |                         |                         |            |                  |                  |            |                         |                         |
| 44 |                            |            |                         |                         |            |                  |                  |            |                         |                         |
| 45 |                            |            |                         |                         |            |                  |                  |            |                         |                         |
| 46 |                            |            |                         |                         |            |                  |                  |            |                         |                         |
| 47 |                            |            |                         |                         |            |                  |                  |            |                         |                         |

|    |                       |            |                  |                  |            |                  |                  |            |                  |                  |
|----|-----------------------|------------|------------------|------------------|------------|------------------|------------------|------------|------------------|------------------|
| 1  |                       |            |                  |                  |            |                  |                  |            |                  |                  |
| 2  |                       |            |                  |                  |            |                  |                  |            |                  |                  |
| 3  | No                    | 351 (12.0) | 1.00 (Reference) | 1.00 (Reference) | 335 (35.9) | 1.00 (Reference) | 1.00 (Reference) | 329 (12.5) | 1.00 (Reference) | 1.00 (Reference) |
| 4  | Yes                   | 39 (10.3)  | 0.79 (0.26-1.35) | 0.73 (0.24-2.19) | 39 (2.6)   | 0.49 (0.06-3.97) | 0.49 (0.06-3.99) | 38 (7.9)   | 0.89 (0.40-2.01) | 0.60 (0.17-2.08) |
| 5  | <b>Ghana/No</b>       |            |                  |                  |            |                  |                  |            |                  |                  |
| 6  | <b>diabetes</b>       |            |                  |                  |            |                  |                  |            |                  |                  |
| 7  | No                    | 2027 (8.3) | 1.00 (Reference) | 1.00 (Reference) | 2035 (3.4) | 1.00 (Reference) | 1.00 (Reference) | 2022 (8.8) | 1.00 (Reference) | 1.00 (Reference) |
| 8  | Yes                   | 102 (4.9)  | 0.50 (0.20-1.25) | 0.48 (0.19-1.19) | 102 (2.9)  | 0.64 (0.19-2.13) | 0.67 (0.20-2.21) | 102 (7.8)  | 0.69 (0.32-1.46) | 0.71 (0.34-1.51) |
| 9  | <b>Ghana/Diabetes</b> |            |                  |                  |            |                  |                  |            |                  |                  |
| 10 | No                    | 185 (26.5) | 1.00 (Reference) | 1.00 (Reference) | 187 (8.7)  | 1.00 (Reference) | 1.00 (Reference) | 185 (27.6) | 1.00 (Reference) | 1.00 (Reference) |
| 11 | Yes                   | 12 (8.3)   | 0.27 (0.03-2.13) | 0.25 (0.03-2.01) | 12 (0.0)   | *** (***-***)    | *** (***-***)    | 12 (8.3)   | 0.42 (0.05-3.32) | 0.27 (0.03-2.19) |
| 12 |                       |            |                  |                  |            |                  |                  |            |                  |                  |
| 13 |                       |            |                  |                  |            |                  |                  |            |                  |                  |
| 14 |                       |            |                  |                  |            |                  |                  |            |                  |                  |
| 15 |                       |            |                  |                  |            |                  |                  |            |                  |                  |

Model 1, adjusted for age and sex; Model 2, adjusted for age, sex, and educational level for Ghanaians (SSA) and length of stay for those in Europe; Abbreviations: CI, confidence interval; ACR, albumin creatinine ration; eGFR, estimated glomerular filtration rate; CKD, chronic kidney disease; OR, odds ratio, n= total number of Ghanaians living in Ghana and Europe among the various levels of PS constructs; %, proportion of individuals with CKD among the various levels of PS constructs in Ghana and Europe.

**S4: Association of psychosocial stressors (PS) indicators (negative life events, discrimination, stress at work/home and depression) with albuminuria, reduced eGFR and CKD risk for Ghanaians living in Ghana and those living in Europe stratified by hypertensive status**

|                               | Albuminuria (ACR $\geq$ 3 mg/mmol) |                  |                  | eGFR < 60 mL/min/1.73 m <sup>2</sup> |                  |                  | High to very high CKD risk (KDIGO, 2012) |                         |                         |
|-------------------------------|------------------------------------|------------------|------------------|--------------------------------------|------------------|------------------|------------------------------------------|-------------------------|-------------------------|
|                               | n (%)                              | OR (95% CI)      |                  | n (%)                                | OR (95% CI)      |                  | n cases (%)                              | OR (95% CI)             |                         |
|                               |                                    | Model 1          | Model 2          |                                      | Model 1          | Model 2          |                                          | Model 1                 | Model 2                 |
| <b>Negative events</b>        |                                    |                  |                  |                                      |                  |                  |                                          |                         |                         |
| <b>Europe/No hypertension</b> |                                    |                  |                  |                                      |                  |                  |                                          |                         |                         |
| No                            | 568 (6.9)                          | 1.00 (Reference) | 1.00 (Reference) | 562 (1.3)                            | 1.00 (Reference) | 1.00 (Reference) | 551 (7.1)                                | 1.00 (Reference)        | 1.00 (Reference)        |
| Yes                           | 743 (5.0)                          | 0.72 (0.45-1.15) | 0.78 (0.48-1.27) | 740 (0.8)                            | 0.59 (0.19-1.77) | 0.60 (0.20-1.83) | 724 (5.1)                                | 0.71 (0.44-1.13)        | 0.75 (0.46-1.22)        |
| <b>Europe/Hypertension</b>    |                                    |                  |                  |                                      |                  |                  |                                          |                         |                         |
| No                            | 560 (9.6)                          | 1.00 (Reference) | 1.00 (Reference) | 544 (4.0)                            | 1.00 (Reference) | 1.00 (Reference) | 539 (10.0)                               | 1.00 (Reference)        | 1.00 (Reference)        |
| Yes                           | 872 (11.4)                         | 1.22 (0.86-1.73) | 1.20 (0.83-1.73) | 847 (3.9)                            | 0.95 (0.54-1.67) | 0.89 (0.49-1.62) | 833 (11.6)                               | 1.19 (0.83-1.69)        | 1.13 (0.78-1.62)        |
| <b>Ghana/No Hypertension</b>  |                                    |                  |                  |                                      |                  |                  |                                          |                         |                         |
| No                            | 540 (6.3)                          | 1.00 (Reference) | 1.00 (Reference) | 543 (2.2)                            | 1.00 (Reference) | 1.00 (Reference) | 540 (6.9)                                | 1.00 (Reference)        | 1.00 (Reference)        |
| Yes                           | 1118 (5.6)                         | 0.88 (0.57-1.36) | 0.84 (0.54-1.31) | 1124 (1.9)                           | 0.82 (0.39-1.69) | 0.86 (0.41-1.79) | 1115 (6.4)                               | 0.93 (0.61-1.40)        | 0.90 (0.59-1.36)        |
| <b>Ghana/Hypertension</b>     |                                    |                  |                  |                                      |                  |                  |                                          |                         |                         |
| No                            | 192 (21.9)                         | 1.00 (Reference) | 1.00 (Reference) | 193 (10.9)                           | 1.00 (Reference) | 1.00 (Reference) | 192 (22.4)                               | 1.00 (Reference)        | 1.00 (Reference)        |
| Yes                           | 476 (18.1)                         | 0.78 (0.52-1.18) | 0.79 (0.52-1.20) | 476 (6.9)                            | 0.58 (0.32-1.04) | 0.58 (0.33-1.05) | 474 (18.4)                               | 0.77 (0.50-1.16)        | 0.76 (0.51-1.16)        |
| <b>Discrimination</b>         |                                    |                  |                  |                                      |                  |                  |                                          |                         |                         |
| <b>Europe/No hypertension</b> |                                    |                  |                  |                                      |                  |                  |                                          |                         |                         |
| No                            | 916 (6.3)                          | 1.00 (Reference) | 1.00 (Reference) | 907 (0.8)                            | 1.00 (Reference) | 1.00 (Reference) | 885 (6.8)                                | 1.00 (Reference)        | 1.00 (Reference)        |
| Yes                           | 379 (3.7)                          | 0.60 (0.33-1.09) | 0.65 (0.36-1.21) | 378 (1.1)                            | 1.35 (0.39-4.74) | 1.37 (0.38-4.89) | 374 (3.2)                                | <b>0.47 (0.25-0.89)</b> | <b>0.51 (0.27-0.97)</b> |
| <b>Europe/Hypertension</b>    |                                    |                  |                  |                                      |                  |                  |                                          |                         |                         |
| No                            | 983 (10.5)                         | 1.00 (Reference) | 1.00 (Reference) | 960 (4.4)                            | 1.00 (Reference) | 1.00 (Reference) | 947 (10.9)                               | 1.00 (Reference)        | 1.00 (Reference)        |
| Yes                           | 431 (10.7)                         | 1.03 (0.71-1.49) | 1.05 (0.72-1.54) | 413 (3.2)                            | 0.73 (0.38-1.39) | 0.75 (0.38-1.48) | 408 (11.0)                               | 1.03 (0.71-1.49)        | 1.04 (0.71-1.53)        |
| <b>Ghana/No hypertension</b>  |                                    |                  |                  |                                      |                  |                  |                                          |                         |                         |
| No                            | 1427 (5.7)                         | 1.00 (Reference) | 1.00 (Reference) | 1437 (2.2)                           | 1.00 (Reference) | 1.00 (Reference) | 1424 (6.5)                               | 1.00 (Reference)        | 1.00 (Reference)        |

|    |                        |            |                  |                  |           |                         |                         |            |                  |                  |
|----|------------------------|------------|------------------|------------------|-----------|-------------------------|-------------------------|------------|------------------|------------------|
| 1  |                        |            |                  |                  |           |                         |                         |            |                  |                  |
| 2  |                        |            |                  |                  |           |                         |                         |            |                  |                  |
| 3  | Yes                    | 81 (7.4)   | 1.30 (0.55-3.09) | 1.30 (0.55-3.10) | 81 (0.0)  | **** (***_***)          | **** (***_***)          | 81 (7.4)   | 1.21 (0.51-2.88) | 1.22 (0.51-2.89) |
| 4  | <b>Ghana/Hyperten</b>  |            |                  |                  |           |                         |                         |            |                  |                  |
| 5  | <b>sion</b>            |            |                  |                  |           |                         |                         |            |                  |                  |
| 6  | No                     | 606 (20.3) | 1.00 (Reference) | 1.00 (Reference) | 609 (7.9) | 1.00 (Reference)        | 1.00 (Reference)        | 606 (20.3) | 1.00 (Reference) | 1.00 (Reference) |
| 7  | Yes                    | 23 (8.7)   | 0.38 (0.09-1.68) | 0.40 (0.09-1.74) | 23 (8.7)  | 1.27 (0.28-5.70)        | 1.20 (0.26-5.44)        | 23 (4.4)   | 0.19 (0.03-1.44) | 0.19 (0.03-1.45) |
| 8  |                        |            |                  |                  |           |                         |                         |            |                  |                  |
| 9  | <b>Stress at</b>       |            |                  |                  |           |                         |                         |            |                  |                  |
| 10 | <b>home/work</b>       |            |                  |                  |           |                         |                         |            |                  |                  |
| 11 | <b>Europe/No</b>       |            |                  |                  |           |                         |                         |            |                  |                  |
| 12 | <b>hypertension</b>    |            |                  |                  |           |                         |                         |            |                  |                  |
| 13 | Never                  | 644 (6.1)  | 1.00 (Reference) | 1.00 (Reference) | 640 (1.3) | 1.00 (Reference)        | 1.00 (Reference)        | 625 (5.8)  | 1.00 (Reference) | 1.00 (Reference) |
| 14 | Some stress            | 468 (4.5)  | 0.74 (0.43-1.27) | 0.81 (0.46-1.43) | 464 (0.4) | 0.37 (0.07-1.74)        | 0.41 (0.09-2.01)        | 457 (4.8)  | 0.84 (0.49-1.45) | 0.91 (0.52-1.60) |
| 15 | Several/Permanent      | 192 (6.8)  | 1.07 (0.56-2.05) | 1.19 (0.61-2.29) | 191 (1.6) | 1.49 (0.38-5.78)        | 1.52 (0.39-5.98)        | 186 (8.1)  | 1.38 (0.74-2.60) | 1.49 (0.79-2.84) |
| 16 | stresses               |            |                  |                  |           |                         |                         |            |                  |                  |
| 17 | <b>Europe/Hyperten</b> |            |                  |                  |           |                         |                         |            |                  |                  |
| 18 | <b>sion</b>            |            |                  |                  |           |                         |                         |            |                  |                  |
| 19 | Never                  | 686 (10.2) | 1.00 (Reference) | 1.00 (Reference) | 665 (5.4) | 1.00 (Reference)        | 1.00 (Reference)        | 657 (11.1) | 1.00 (Reference) | 1.00 (Reference) |
| 20 | Some stress            | 534 (11.1) | 1.03 (0.71-1.49) | 1.05 (0.72-1.54) | 520 (2.3) | <b>0.49 (0.25-0.96)</b> | <b>0.47 (0.23-0.95)</b> | 511 (10.9) | 0.97 (0.67-1.41) | 0.99 (0.67-0.47) |
| 21 | Several/Permanent      | 205 (11.2) | 1.11 (0.67-1.82) | 1.12 (0.67-1.87) | 199 (3.0) | 0.56 (0.23-1.37)        | 0.58 (0.24-1.43)        | 197 (11.2) | 0.99 (0.59-1.64) | 1.03 (0.61-1.74) |
| 22 | stresses               |            |                  |                  |           |                         |                         |            |                  |                  |
| 23 | <b>Ghana/No</b>        |            |                  |                  |           |                         |                         |            |                  |                  |
| 24 | <b>hypertension</b>    |            |                  |                  |           |                         |                         |            |                  |                  |
| 25 | Never                  | 495 (5.5)  | 1.00 (Reference) | 1.00 (Reference) | 498 (1.4) | 1.00 (Reference)        | 1.00 (Reference)        | 495 (5.9)  | 1.00 (Reference) | 1.00 (Reference) |
| 26 | Some stress            | 899 (5.9)  | 1.07 (0.66-1.73) | 0.99 (0.61-1.60) | 901 (2.2) | 1.30 (0.54-3.15)        | 1.39 (0.57-3.37)        | 896 (6.5)  | 1.04 (0.65-1.65) | 1.00 (0.63-1.59) |
| 27 | Several/permanent      | 263 (5.7)  | 1.01 (0.53-1.95) | 0.89 (0.46-1.72) | 267 (2.6) | 1.69 (0.58-5.01)        | 1.89 (0.63-5.65)        | 263 (7.6)  | 1.21 (0.67-2.20) | 1.15 (0.63-2.11) |
| 28 | stresses               |            |                  |                  |           |                         |                         |            |                  |                  |
| 29 | <b>Ghana/Hyperten</b>  |            |                  |                  |           |                         |                         |            |                  |                  |
| 30 | <b>sion</b>            |            |                  |                  |           |                         |                         |            |                  |                  |
| 31 | Never                  | 187 (22.9) | 1.00 (Reference) | 1.00 (Reference) | 190 (8.4) | 1.00 (Reference)        | 1.00 (Reference)        | 187 (20.9) | 1.00 (Reference) | 1.00 (Reference) |
| 32 | Some stress            | 379 (18.2) | 0.74 (0.48-1.14) | 0.68 (0.43-1.05) | 377 (7.9) | 0.95 (0.50-1.80)        | 0.99 (0.51-1.91)        | 377 (19.4) | 0.90 (0.58-1.40) | 0.87 (0.55-1.36) |
| 33 | Several/Permanent      | 102 (15.7) | 0.62 (0.33-1.17) | 0.54 (0.28-1.04) | 102 (7.8) | 0.92 (0.37-2.26)        | 0.97 (0.39-2.43)        | 102 (17.7) | 0.79 (0.42-1.49) | 0.76 (0.40-1.43) |
| 34 | stresses               |            |                  |                  |           |                         |                         |            |                  |                  |
| 35 |                        |            |                  |                  |           |                         |                         |            |                  |                  |
| 36 | <b>Depressive</b>      |            |                  |                  |           |                         |                         |            |                  |                  |
| 37 | <b>symptoms</b>        |            |                  |                  |           |                         |                         |            |                  |                  |
| 38 | <b>Europe/No</b>       |            |                  |                  |           |                         |                         |            |                  |                  |
| 39 | <b>hypertension</b>    |            |                  |                  |           |                         |                         |            |                  |                  |
| 40 |                        |            |                  |                  |           |                         |                         |            |                  |                  |
| 41 |                        |            |                  |                  |           |                         |                         |            |                  |                  |
| 42 |                        |            |                  |                  |           |                         |                         |            |                  |                  |
| 43 |                        |            |                  |                  |           |                         |                         |            |                  |                  |
| 44 |                        |            |                  |                  |           |                         |                         |            |                  |                  |
| 45 |                        |            |                  |                  |           |                         |                         |            |                  |                  |
| 46 |                        |            |                  |                  |           |                         |                         |            |                  |                  |
| 47 |                        |            |                  |                  |           |                         |                         |            |                  |                  |

1  
2  
3  
4  
5  
6  
7  
8  
9  
10  
11  
12  
13  
14  
15  
16  
17  
18  
19  
20  
21  
22  
23  
24  
25  
26  
27  
28  
29  
30  
31  
32  
33  
34  
35  
36  
37  
38  
39  
40  
41  
42  
43  
44  
45  
46  
47

|                              |            |                  |                  |            |                   |                   |             |                   |                  |  |
|------------------------------|------------|------------------|------------------|------------|-------------------|-------------------|-------------|-------------------|------------------|--|
| No                           | 1195 (5.9) | 1.00 (Reference) | 1.00 (Reference) | 1187 (1.1) | 1.00 (Reference)  | 1.00 (Reference)  | 1162 (6.0)  | 1.00 (Reference)  | 1.00 (Reference) |  |
| Yes                          | 101 (3.9)  | 0.59 (0.21-1.65) | 0.64 (0.23-1.82) | 99 (1.0)   | 1.18 (0.15-2.72)  | 1.27 (0.16-10.17) | 98 (5.1)    | 0.77 (0.30-1.97)  | 0.84 (0.33-2.17) |  |
| <b>Europe/Hypertension</b>   |            |                  |                  |            |                   |                   |             |                   |                  |  |
| No                           | 1310(10.9) | 1.00 (Reference) | 1.00 (Reference) | 1270 (4.1) | 1.00 (Reference)  | 1.00 (Reference)  | 1254 (11.2) | 1.00 (Reference)  | 1.00 (Reference) |  |
| Yes                          | 105 (8.6)  | 0.76 (0.37-1.53) | 0.75 (0.37-1.55) | 103 (1.9)  | 0.52 (0.12-2.18)  | 0.56 (0.13-2.38)  | 101 (8.9)   | 0.77 (0.38-1.58)  | 0.80 (0.39-1.63) |  |
| <b>Ghana/No hypertension</b> |            |                  |                  |            |                   |                   |             |                   |                  |  |
| No                           | 1575 (5.9) | 1.00 (Reference) | 1.00 (Reference) | 1584 (2.1) | 1.00 (Reference)  | 1.00 (Reference)  | 1572 (6.7)  | 1.00 (Reference)  | 1.00 (Reference) |  |
| Yes                          | 82 (2.4)   | 0.36 (0.09-1.51) | 0.35 (0.08-1.44) | 82 (1.2)   | 0.39 (0.059-2.95) | 0.39 (0.05-2.97)  | 82 (3.7)    | 0.44 (0.13-1.42)  | 0.43 (0.13-1.40) |  |
| <b>Ghana/Hypertension</b>    |            |                  |                  |            |                   |                   |             |                   |                  |  |
| No                           | 636 (19.5) | 1.00 (Reference) | 1.00 (Reference) | 637 (8.2)  | 1.00 (Reference)  | 1.00 (Reference)  | 634 (19.6)  | 1.00 (Reference)  | 1.00 (Reference) |  |
| Yes                          | 32 (12.5)  | 0.59 (0.20-1.72) | 0.59 (0.20-1.74) | 32 (6.3)   | 0.74 (0.17-3.25)  | 0.76 (0.17-3.33)  | 32 (18.8)   | 0.94 (0.037-2.37) | 0.94 (0.38-2.37) |  |

Model 1, adjusted for age and sex; Model 2, adjusted for age, sex, and educational level for Ghanaians (SSA) and length of stay for those in Europe; Abbreviations: CI, confidence interval; ACR, albumin creatinine ration; eGFR, estimated glomerular filtration rate; CKD, chronic kidney disease; OR, odds ratio, n= total number of Ghanaians living in Ghana and Europe among the various levels of PS constructs; %, proportion of individuals with CKD among the various levels of PS constructs in Ghana and Europe.

## STROBE Statement—checklist of items that should be included in reports of observational studies

|                           | Item No. | Recommendation                                                                                      | Page No.        | Relevant text from manuscript                                                                                                                                                                                                                                  |
|---------------------------|----------|-----------------------------------------------------------------------------------------------------|-----------------|----------------------------------------------------------------------------------------------------------------------------------------------------------------------------------------------------------------------------------------------------------------|
| <b>Title and abstract</b> | 1        | (a) Indicate the study's design with a commonly used term in the title or the abstract              | 1 lines 1-3     | We have included a commonly used term in the title and abstract                                                                                                                                                                                                |
|                           |          | (b) Provide in the abstract an informative and balanced summary of what was done and what was found | 3 lines 87-116  | Our study shows no convincing evidence for associations between stress as indicated by four PS constructs and prevalence of CKD. Further studies aimed at identifying potential factors driving the high prevalence of CKD among these populations are needed. |
| <b>Introduction</b>       |          |                                                                                                     |                 |                                                                                                                                                                                                                                                                |
| Background/rationale      | 2        | Explain the scientific background and rationale for the investigation being reported                | 5 lines 180-226 | The theoretical and scientific background as well as the rationale for conducting the study have been provided in the introduction section.                                                                                                                    |
| Objectives                | 3        | State specific objectives, including any pre specified hypotheses                                   | 5 lines 222-226 | We examined the association between PS and CKD prevalence among rural and urban Ghanaians and their migrants living in three European cities. We also                                                                                                          |

assessed if the influence of PS on CKD is partially mediated by primary risk factors (hypertension and diabetes) of CKD.

**Methods**

|                           |    |                                                                                                                                                                                                                                                                                                                                                                                                                                                                        |                        |                                                                                                                                                                                                                                            |
|---------------------------|----|------------------------------------------------------------------------------------------------------------------------------------------------------------------------------------------------------------------------------------------------------------------------------------------------------------------------------------------------------------------------------------------------------------------------------------------------------------------------|------------------------|--------------------------------------------------------------------------------------------------------------------------------------------------------------------------------------------------------------------------------------------|
| Study design              | 4  | Present key elements of study design early in the paper                                                                                                                                                                                                                                                                                                                                                                                                                | -6-7 lines 232-264     | Details given in the methods                                                                                                                                                                                                               |
| Setting                   | 5  | Describe the setting, locations, and relevant dates, including periods of recruitment, exposure, follow-up, and data collection                                                                                                                                                                                                                                                                                                                                        | 6-7 lines 232-264      | Rural or urban Ghana and three (Amsterdam, Berlin, London) European cities (migrants)                                                                                                                                                      |
| Participants              | 6  | (a) <i>Cohort study</i> —Give the eligibility criteria, and the sources and methods of selection of participants. Describe methods of follow-up<br><i>Case-control study</i> —Give the eligibility criteria, and the sources and methods of case ascertainment and control selection. Give the rationale for the choice of cases and controls<br><i>Cross-sectional study</i> —Give the eligibility criteria, and the sources and methods of selection of participants | Pg. 7 lines 254-264    | A multi-centred cross sectional baseline data from the Research on Obesity and Diabetes among African Migrants (RODAM) study. A random sample of 5,659 adults (Europe, 3167, rural, 1,043, Urban Ghana, 1,449, Ghana) aged 25 to 70 years. |
|                           |    | (b) <i>Cohort study</i> —For matched studies, give matching criteria and number of exposed and unexposed<br><i>Case-control study</i> —For matched studies, give matching criteria and the number of controls per case                                                                                                                                                                                                                                                 |                        |                                                                                                                                                                                                                                            |
| Variables                 | 7  | Clearly define all outcomes, exposures, predictors, potential confounders, and effect modifiers. Give diagnostic criteria, if applicable                                                                                                                                                                                                                                                                                                                               | Pg. 7-10 lines 266-357 | The main outcomes have been clearly defined.                                                                                                                                                                                               |
| Data sources/ measurement | 8* | For each variable of interest, give sources of data and details of methods of assessment (measurement). Describe comparability of assessment methods if there is more than one group                                                                                                                                                                                                                                                                                   | Pg. 7-10 lines 266-357 | We defined each variable of interest in the methods                                                                                                                                                                                        |

|            |    |                                                           |                     |                                                                                         |
|------------|----|-----------------------------------------------------------|---------------------|-----------------------------------------------------------------------------------------|
|            |    |                                                           |                     | accordingly                                                                             |
| Bias       | 9  | Describe any efforts to address potential sources of bias | Pg. 9 lines 315-331 | Potential sources of bias have been reported in the methods sections.                   |
| Study size | 10 | Explain how the study size was arrived at                 | Pg. 7 lines 259-264 | Given in the methods section and we have also referred to the RODAM study methods paper |

Continued on next page

For peer review only



|    |                  |     |                                                                                                      |             |                                   |
|----|------------------|-----|------------------------------------------------------------------------------------------------------|-------------|-----------------------------------|
| 1  |                  |     |                                                                                                      |             |                                   |
| 2  | Quantitative     | 11  | Explain how quantitative variables were handled in the analyses. If applicable, describe which       | Pg. 10-11   | Please see methods                |
| 3  | variables        |     | groupings were chosen and why                                                                        | lines 368-  |                                   |
| 4  |                  |     |                                                                                                      | 388         |                                   |
| 5  |                  |     |                                                                                                      |             |                                   |
| 6  | Statistical      | 12  | (a) Describe all statistical methods, including those used to control for confounding                | Pg. 10-11   | Please see methods                |
| 7  | methods          |     |                                                                                                      | lines 367-  |                                   |
| 8  |                  |     |                                                                                                      | 387         |                                   |
| 9  |                  |     |                                                                                                      |             |                                   |
| 10 |                  |     | (b) Describe any methods used to examine subgroups and interactions                                  | Pg. 10-11   | Please see methods                |
| 11 |                  |     |                                                                                                      | lines 367-  |                                   |
| 12 |                  |     |                                                                                                      | 387         |                                   |
| 13 |                  |     |                                                                                                      |             |                                   |
| 14 |                  |     | (c) Explain how missing data were addressed                                                          | Pg. 7 lines |                                   |
| 15 |                  |     |                                                                                                      | 259-264     |                                   |
| 16 |                  |     | (d) <i>Cohort study</i> —If applicable, explain how loss to follow-up was addressed                  | NA          | We have reported non-response     |
| 17 |                  |     | <i>Case-control study</i> —If applicable, explain how matching of cases and controls was addressed   |             | across sites                      |
| 18 |                  |     | <i>Cross-sectional study</i> —If applicable, describe analytical methods taking account of sampling  |             |                                   |
| 19 |                  |     | strategy                                                                                             |             |                                   |
| 20 |                  |     |                                                                                                      |             |                                   |
| 21 |                  |     | (e) Describe any sensitivity analyses                                                                | NA          |                                   |
| 22 |                  |     |                                                                                                      |             |                                   |
| 23 | <b>Results</b>   |     |                                                                                                      |             |                                   |
| 24 | Participants     | 13* | (a) Report numbers of individuals at each stage of study—eg numbers potentially eligible, examined   | Pg. 7 lines | Non-response analysis was done to |
| 25 |                  |     | for eligibility, confirmed eligible, included in the study, completing follow-up, and analysed       | 254-264     | shed light on the differential    |
| 26 |                  |     |                                                                                                      |             | response rates across sites       |
| 27 |                  |     | (b) Give reasons for non-participation at each stage                                                 | Pg. 7 lines |                                   |
| 28 |                  |     |                                                                                                      | 259-264     |                                   |
| 29 |                  |     |                                                                                                      |             |                                   |
| 30 |                  |     | (c) Consider use of a flow diagram                                                                   | Pg. 6 lines | We have also referred to RODAM    |
| 31 |                  |     |                                                                                                      | 232-234     | methods paper                     |
| 32 | Descriptive data | 14* | (a) Give characteristics of study participants (eg demographic, clinical, social) and information on | Pg. 7 lines | We have also referred to RODAM    |
| 33 |                  |     | exposures and potential confounders                                                                  | 269-357     | methods paper                     |
| 34 |                  |     | (b) Indicate number of participants with missing data for each variable of interest                  | Pg. 7 lines | We have also referred to RODAM    |
| 35 |                  |     |                                                                                                      | 260-264     | methods paper                     |
| 36 |                  |     |                                                                                                      |             |                                   |
| 37 |                  |     | (c) <i>Cohort study</i> —Summarise follow-up time (eg, average and total amount)                     | NA          |                                   |
| 38 | Outcome data     | 15* | <i>Cohort study</i> —Report numbers of outcome events or summary measures over time                  | NA          |                                   |
| 39 |                  |     | <i>Case-control study</i> —Report numbers in each exposure category, or summary measures of exposure | NA          |                                   |
| 40 |                  |     |                                                                                                      |             |                                   |
| 41 |                  |     |                                                                                                      |             |                                   |
| 42 |                  |     |                                                                                                      |             |                                   |
| 43 |                  |     |                                                                                                      |             |                                   |
| 44 |                  |     |                                                                                                      |             |                                   |
| 45 |                  |     |                                                                                                      |             |                                   |
| 46 |                  |     |                                                                                                      |             |                                   |

|                          |    |                                                                                                                                                                                                              |                            |                                                                                                                                                  |
|--------------------------|----|--------------------------------------------------------------------------------------------------------------------------------------------------------------------------------------------------------------|----------------------------|--------------------------------------------------------------------------------------------------------------------------------------------------|
|                          |    | <i>Cross-sectional study</i> —Report numbers of outcome events or summary measures                                                                                                                           | Pg. 11-13                  | Summary measures are given in the results section and in tables and figures                                                                      |
| Main results             | 16 | (a) Give unadjusted estimates and, if applicable, confounder-adjusted estimates and their precision (eg, 95% confidence interval). Make clear which confounders were adjusted for and why they were included | Pg. 11-23<br>lines 406-521 | Unadjusted and adjusted estimates are given in the results section and in figures                                                                |
|                          |    | (b) Report category boundaries when continuous variables were categorized                                                                                                                                    | Pg. 11-23<br>lines 389-521 | We have provided mean and corresponding standard deviations for the continuous variables.                                                        |
|                          |    | (c) If relevant, consider translating estimates of relative risk into absolute risk for a meaningful time                                                                                                    | NA                         |                                                                                                                                                  |
| Continued on next page   |    |                                                                                                                                                                                                              |                            |                                                                                                                                                  |
| Other analyses           | 17 | Report other analyses done—eg analyses of subgroups and interactions, and sensitivity analyses                                                                                                               | NA                         |                                                                                                                                                  |
| <b>Discussion</b>        |    |                                                                                                                                                                                                              |                            |                                                                                                                                                  |
| Key results              | 18 | Summarise key results with reference to study objectives                                                                                                                                                     | Pg. 24 lines<br>524--531   |                                                                                                                                                  |
| Limitations              | 19 | Discuss limitations of the study, taking into account sources of potential bias or imprecision. Discuss both direction and magnitude of any potential bias                                                   | Pg. 25 lines<br>584-596    | Key limitations regarding study methods including differential response rates and sampling methods in the various study sites have been provided |
| Interpretation           | 20 | Give a cautious overall interpretation of results considering objectives, limitations, multiplicity of analyses, results from similar studies, and other relevant evidence                                   | Pg. 24-26<br>lines 522-603 | Cautious overall interpretation of the key findings have been provided.                                                                          |
| Generalisability         | 21 | Discuss the generalisability (external validity) of the study results                                                                                                                                        | Pg. 25 lines<br>584-596    |                                                                                                                                                  |
| <b>Other information</b> |    |                                                                                                                                                                                                              |                            |                                                                                                                                                  |
| Funding                  | 22 | Give the source of funding and the role of the funders for the present study and, if applicable, for the original study on which the present article is based                                                | Pg. 26 lines<br>624-630    | The funders had no role in study design, data collection and analysis, decision to publish, or preparation of the manuscript                     |

\*Give information separately for cases and controls in case-control studies and, if applicable, for exposed and unexposed groups in cohort and cross-sectional studies.

1  
2  
3  
4  
5  
6  
7  
8  
9  
10  
11  
12  
13  
14  
15  
16  
17  
18  
19  
20  
21  
22  
23  
24  
25  
26  
27  
28  
29  
30  
31  
32  
33  
34  
35  
36  
37  
38  
39  
40  
41  
42  
43  
44  
45  
46

**Note:** An Explanation and Elaboration article discusses each checklist item and gives methodological background and published examples of transparent reporting. The STROBE checklist is best used in conjunction with this article (freely available on the Web sites of PLoS Medicine at <http://www.plosmedicine.org/>, Annals of Internal Medicine at <http://www.annals.org/>, and Epidemiology at <http://www.epidem.com/>). Information on the STROBE Initiative is available at [www.strobe-statement.org](http://www.strobe-statement.org).

For peer review only

# BMJ Open

## A CROSS-SECTIONAL STUDY OF ASSOCIATION BETWEEN PSYCHOSOCIAL STRESSORS WITH CHRONIC KIDNEY DISEASE AMONG MIGRANT AND NON-MIGRANT GHANAIS LIVING IN EUROPE AND GHANA: THE RODAM STUDY

|                                 |                                                                                                                                                                                                                                                                                                                                                                                                                                                                                                                                                                                                                                                                                                                                                                                                                                                                                                                                                                                                                                                                                                                                                                                                                                                                                                                                                                                                                                                                                                                                                                       |
|---------------------------------|-----------------------------------------------------------------------------------------------------------------------------------------------------------------------------------------------------------------------------------------------------------------------------------------------------------------------------------------------------------------------------------------------------------------------------------------------------------------------------------------------------------------------------------------------------------------------------------------------------------------------------------------------------------------------------------------------------------------------------------------------------------------------------------------------------------------------------------------------------------------------------------------------------------------------------------------------------------------------------------------------------------------------------------------------------------------------------------------------------------------------------------------------------------------------------------------------------------------------------------------------------------------------------------------------------------------------------------------------------------------------------------------------------------------------------------------------------------------------------------------------------------------------------------------------------------------------|
| Journal:                        | <i>BMJ Open</i>                                                                                                                                                                                                                                                                                                                                                                                                                                                                                                                                                                                                                                                                                                                                                                                                                                                                                                                                                                                                                                                                                                                                                                                                                                                                                                                                                                                                                                                                                                                                                       |
| Manuscript ID                   | bmjopen-2018-027931.R2                                                                                                                                                                                                                                                                                                                                                                                                                                                                                                                                                                                                                                                                                                                                                                                                                                                                                                                                                                                                                                                                                                                                                                                                                                                                                                                                                                                                                                                                                                                                                |
| Article Type:                   | Research                                                                                                                                                                                                                                                                                                                                                                                                                                                                                                                                                                                                                                                                                                                                                                                                                                                                                                                                                                                                                                                                                                                                                                                                                                                                                                                                                                                                                                                                                                                                                              |
| Date Submitted by the Author:   | 28-May-2019                                                                                                                                                                                                                                                                                                                                                                                                                                                                                                                                                                                                                                                                                                                                                                                                                                                                                                                                                                                                                                                                                                                                                                                                                                                                                                                                                                                                                                                                                                                                                           |
| Complete List of Authors:       | <p>Adjei Nana, David ; University of Ghana, Department of Medical Laboratory Sciences; University of Amsterdam, Department of Public Health</p> <p>Stronks, Karien; Academic Medical Center , Department of Public Health</p> <p>Adu, Dwomoa; Korle-bu Teaching Hospital, Department of Medicine</p> <p>Beune, Erik; AMC</p> <p>Meeks, Karlijn; AMC, Public Health</p> <p>Smeeth, Liam; London School of Hygiene and Tropical Medicine, Addo, Juliet; London School of Hygiene and Tropical Medicine, Non Communicable Disease Epidemiology</p> <p>Owusu-Dabo, Ellis; Kwame Nkrumah University of Science and Technology, Kumasi Centre for Collaborative Research in Tropical Medicine</p> <p>Klipstein-Grobusch, Kerstin; 1 Julius Global Health, Julius Center for Health Sciences and Primary Care, University Medical Centre Utrecht, Utrecht, The Netherlands</p> <p>Mockenhaupt, Frank; Charité – University Medicine, Berlin, Institute of Tropical Medicine and International Health</p> <p>Schulze, Matthias; German Institute of Human Nutrition Potsdam-Rehbruecke</p> <p>Danquah, Ina; German Institute of Human Nutrition, Molecular Epidemiology; Charite Universitätsmedizin Berlin, Institute for Social Medicine, Epidemiology and Health Economy</p> <p>Spranger, Joachim; Department of Endocrinology and Metabolism, 1. Charité-University Medicine Berlin, Berlin, Germany.</p> <p>Bahendeka, Silver; St. Francis Hospital Nsambya,</p> <p>Agyemang, Charles; Academic Medical centre, University of Amsterdam, Department of Public Health</p> |
| <b>Primary Subject Heading</b>: | Public health                                                                                                                                                                                                                                                                                                                                                                                                                                                                                                                                                                                                                                                                                                                                                                                                                                                                                                                                                                                                                                                                                                                                                                                                                                                                                                                                                                                                                                                                                                                                                         |
| Secondary Subject Heading:      | Epidemiology, Public health, Renal medicine                                                                                                                                                                                                                                                                                                                                                                                                                                                                                                                                                                                                                                                                                                                                                                                                                                                                                                                                                                                                                                                                                                                                                                                                                                                                                                                                                                                                                                                                                                                           |
| Keywords:                       | Chronic Kidney Disease, Psychosocial stressors, migrants, rodam study, Europe, Ghana                                                                                                                                                                                                                                                                                                                                                                                                                                                                                                                                                                                                                                                                                                                                                                                                                                                                                                                                                                                                                                                                                                                                                                                                                                                                                                                                                                                                                                                                                  |
|                                 |                                                                                                                                                                                                                                                                                                                                                                                                                                                                                                                                                                                                                                                                                                                                                                                                                                                                                                                                                                                                                                                                                                                                                                                                                                                                                                                                                                                                                                                                                                                                                                       |

1  
2  
3  
4  
5  
6  
7  
8  
9  
10  
11  
12  
13  
14  
15  
16  
17  
18  
19  
20  
21  
22  
23  
24  
25  
26  
27  
28  
29  
30  
31  
32  
33  
34  
35  
36  
37  
38  
39  
40  
41  
42  
43  
44  
45  
46  
47  
48  
49  
50  
51  
52  
53  
54  
55  
56  
57  
58  
59  
60

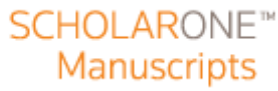

1  
2  
3  
4  
5  
6  
7  
8  
9  
10  
11  
12  
13  
14  
15  
16  
17  
18  
19  
20  
21  
22  
23  
24  
25  
26  
27  
28  
29  
30  
31  
32  
33  
34  
35  
36  
37  
38  
39  
40  
41  
42  
43  
44  
45  
46  
47  
48  
49  
50  
51  
52  
53  
54  
55  
56  
57  
58  
59  
60

**1 A CROSS SECTIONAL STUDY OF ASSOCIATION BETWEEN PSYCHOSOCIAL**  
**2 STRESSORS WITH CHRONIC KIDNEY DISEASE AMONG MIGRANT AND NON-**  
**3 MIGRANT GHANAIS LIVING IN EUROPE AND GHANA: THE RODAM STUDY**

4 David N. Adjei, MSc, PhD<sup>1,2</sup>; Karien Stronks, MSc, PhD<sup>1</sup>; Dwomoa Adu, MD<sup>3</sup>; Erik Beune, MSc, PhD<sup>1</sup>;  
5 Karlijn Meeks, MSc, PhD<sup>1</sup>; Liam Smeeth, MD, PhD<sup>4</sup>; Juliet, Addo, MD, PhD<sup>4</sup>; Ellis Owusu-Dabo, MSc,  
6 PhD<sup>5</sup>; Kerstin Klipstein-Grobusch, MSc, PhD<sup>6,7</sup>; Frank P. Mockenhaupt, MD, PhD<sup>8</sup>; Matthias B. Schulze,  
7 MSc, PhD<sup>9</sup>; Ina, Danquah, MSc, PhD<sup>9,10</sup>; Joachim, Spranger, MD, PhD<sup>11,12,13</sup>; Silver Bahendeka, MD,  
8 PhD<sup>14</sup>; Charles Agyemang, MPH, PHD<sup>1</sup>

- 9 1. Department of Public Health, Academic Medical Center, University of Amsterdam, Amsterdam,  
10 Amsterdam Public Health Research Institute, Amsterdam, The Netherlands.
- 11 2. Department of Medical Laboratory Sciences, School of Biomedical and Allied Health Sciences,  
12 College of Health Sciences, University of Ghana, Accra, Ghana.
- 13 3. Department of Medicine, School of Medicine and Dentistry, University of Ghana and Korle-Bu  
14 Teaching Hospital, Accra, Ghana.
- 15 4. Department of Non-Communicable Disease Epidemiology, London School of Hygiene and Tropical  
16 Medicine, London, United Kingdom.
- 17 5. Kumasi Centre for collaborative Research, KNUST, Kumasi, Ghana.
- 18 6. Julius Global Health, Julius Center for Health Sciences and Primary Care, University Medical Centre,  
19 Utrecht University, The Netherlands
- 20 7. Division of Epidemiology & Biostatistics, School of Public Health, Faculty of Health Sciences,  
21 University of the Witwatersrand, Johannesburg, South Africa
- 22 8. Institute of Tropical Medicine and International Health, Charité –University Medicine Berlin,  
23 Augustenburger Platz 1, 13353 Berlin, Germany.
- 24 9. Department of Molecular Epidemiology, German Institute of Human Nutrition Potsdam-Rehbrücke,  
25 Nuthetal, Germany.
- 26 10. Charité - Universitaetsmedizin Berlin, Institute for Social Medicine, Epidemiology and Health  
27 Economics, Berlin, Germany.
- 28 11. Department of Endocrinology and Metabolism, Charité-University Medicine Berlin, Berlin, Germany.
- 29 12. German Centre for Cardiovascular Research (DZHK), Berlin, Germany.
- 30 13. Center for Cardiovascular Research (CCR), Charité-University, Medicine, Berlin, Germany.
- 31
- 32 14. MKPGMS - Uganda Martyrs University, Kampala, Uganda.

1  
2  
3  
4  
5  
6  
7  
8  
9  
10  
11  
12  
13  
14  
15  
16  
17  
18  
19  
20  
21  
22  
23  
24  
25  
26  
27  
28  
29  
30  
31  
32  
33  
34  
35  
36  
37  
38  
39  
40  
41  
42  
43  
44  
45  
46  
47  
48  
49  
50  
51  
52  
53  
54  
55  
56  
57  
58  
59  
60

39 Address correspondence to David Nana Adjei, MSc, Department of Public Health, Academic Medical  
40 Centre, University of Amsterdam, Meibergdreef 9, 1105 AZ Amsterdam, the Netherlands, School  
41 Biomedical and Allied Health Sciences, Medical Laboratory Sciences, University of Ghana, E-mail:  
42 [dna@chs.edu.gh](mailto:dna@chs.edu.gh), [d.n.adjei@amc.uva.nl](mailto:d.n.adjei@amc.uva.nl), Tel: +233236717850

For peer review only

1  
2  
3 **87 Abstract**

4 **88**  
5 **89 Objectives:** The association between Psychosocial stressors (PS) and CKD among sub-Saharan African  
6 **90** (SSA) populations is unknown. We examined the association between PS and CKD prevalence among rural  
7 **91** and urban Ghanaians and Ghanaian migrants living in three European cities. We also assessed if the  
8 **92** influence of PS on CKD is partially mediated by primary risk factors (hypertension and diabetes) of CKD  
9 **93**

10 **94 Design:** A multi-centred cross sectional data from the Research on Obesity and Diabetes among African  
11 **95** Migrants (RODAM) study  
12 **96**

13 **97 Setting:** Rural and urban Ghana and three European cities (Amsterdam, Berlin and London).  
14 **98**

15 **99 Participants:** A random sample of 5,659 adults (Europe 3167, rural Ghana 1,043, and Urban Ghana 1,449)  
16 **100** aged 25 to 70 years  
17 **101**

18 **102 Explanatory measures:** PS defined by negative life events, perceived discrimination, perceived stress at  
19 **103** work/home and depressive symptoms. Three CKD outcomes were considered using the 2012 KDIGO  
20 **104** (Kidney Disease: Improving Global Outcomes) severity of CKD classification. Comparisons between PS  
21 **105** and CKD outcomes were made using logistic regression analyses across all sites  
22 **106**

23 **107 Results:** We observed higher proportion of negative life events (68.7%) and perceived permanent stress  
24 **108** (15.9%) among Ghanaians living in Ghana than Ghanaians living in Europe. Depressive symptoms (7.5%)  
25 **109** and perceived discrimination (29.7%) were more common among Ghanaians living in Europe than  
26 **110** Ghanaians living in Ghana. No significant association was observed between any of the PS constructs and  
27 **111** CKD outcomes across sites except for positive association between stress at work/home and albuminuria  
28 **112** (2.81, 95% C.I. 1.46-5.40) and CKD risk (2.78, 95% C.I. 1.43-5.43) among Ghanaians living in Berlin  
29 **113**

30 **114 Conclusion:** Our study found a positive association between stress at work/home and albuminuria and  
31 **115** CKD risk. There was no convincing evidence of associations between the other PS constructs and the  
32 **116** prevalence of CKD risk. Further studies, are needed to identify potential factors driving the high prevalence  
33 **117** of CKD among these populations.  
34 **118**

35 **119 Index Words:** Chronic kidney disease; psychosocial stressors; risk factor; migrants; RODAM study,  
36 **120** Europe, Ghana  
37 **121**

38 **122**

39 **123**

40 **124**

41 **125**

42 **126**

43 **127**

44 **128**

45 **129**

46 **130**

47 **131**

48 **132**

49 **133**

50 **134**

51 **135**

52 **136**

53 **137**

54

55

56

57

58

59

60



1  
2  
3  
4  
5  
6  
7  
8  
9  
10  
11  
12  
13  
14  
15  
16  
17  
18  
19  
20  
21  
22  
23  
24  
25  
26  
27  
28  
29  
30  
31  
32  
33  
34  
35  
36  
37  
38  
39  
40  
41  
42  
43  
44  
45  
46  
47  
48  
49  
50  
51  
52  
53  
54  
55  
56  
57  
58  
59  
60138  
139  
140  
141  
142  
143  
144  
145  
146  
147  
148  
149  
150  
151  
152  
153  
154  
155  
156  
157  
158  
159  
160  
161  
162  
163  
164  
165  
166  
167  
168  
169  
170  
171  
172  
173  
174  
175  
176  
177  
178  
179**Strengths and limitations of the study**

- This study used all three categories of CKD definitions (albuminuria, reduced eGFR and CKD risk) by KDIGO 2012 in assessing association of SS with CKD across all sites. This provided more detailed information on CKD outcomes.
- All sites in our study used well standardized study protocols and this eliminated intra protocol variability.
- The use of four constructs of psychosocial stressors (negative life events, perceived discrimination, perceived stress at work/home and depressive symptoms) provided a robust approach to assessing SS associations with CKD.
- The limitation of intra laboratory variability in earlier studies was eliminated using the same standard operating procedures in the same laboratory for running all samples for all sites.
- PS is captured and experienced in different magnitude across different populations. We were unable to ascertain if PS as defined in this study was adequately captured among Ghanaians living in rural and urban Ghana.

1  
2  
3 180  
4 181 **Introduction**

5 182  
6 183 Worldwide, Chronic Kidney Disease (CKD) is a leading cause of mortality and morbidity with several risk  
7 184 factors (diabetes mellitus, obesity, hypertension and cardiovascular disease)<sup>1</sup>. The epidemiologic transition  
8 185 in low-and-middle income countries (LMICs) shows increased burden of these risk factors<sup>2-4</sup>. CKD's high  
9 186 morbidity and mortality is mostly driven by uncontrolled comorbidities such as diabetes and hypertension  
10 187<sup>5 6</sup>. CKD treatment and management cost is very high and not sustainable even in high-income countries  
11 188 and this underscores the need for prevention<sup>7</sup>. Available literature has shown that both individual and  
12 189 community level economic factors influence CKD<sup>8-10</sup>. However, after adjusting for both individual and  
13 190 community level socioeconomic position, differences in CKD risk among different populations remained<sup>8</sup>  
14 191<sup>10 11</sup>. These findings seem to suggest that other social environmental factors may be driving CKD prevalence  
15 192 and progression in high-risk populations. Recent studies have shown that whereas Ghanaians living in  
16 193 Europe have a higher CKD risk compared to their host nation populations, they have a lower CKD risk  
17 194 compared with their peers living in urban Ghana<sup>12</sup>. The increased risk of CKD observed in urban Ghana  
18 195 was not fully explained by conventional risk factors<sup>12</sup> and socio-economic status<sup>13</sup>. This underscores the  
19 196 need to identify other modifiable risk factors of CKD for prevention, optimum treatment and efficient  
20 197 management.

21 198  
22 199 Evidence shows that where an individual works or stays influences his or her physiological wellbeing  
23 200 leading to an increased risk of chronic diseases<sup>14 15</sup>. Thus, migrants' physiological wellbeing is influenced  
24 201 by the environment (host nations) they move to stay. The association between PS and CKD as well as the  
25 202 biological pathways through which PS influences CKD progression is poorly understood and complex<sup>5</sup>  
26 203 although several pathways have been suggested<sup>16 17</sup>. Specifically, PS have been reported to be associated  
27 204 with alteration in the sympathetic/autonomic nervous system activity leading to higher rates of traditional  
28 205 risk factors of CKD including hypertension and diabetes<sup>18-20</sup>. Environmental stressors have been reported  
29 206 to contribute to the development of insulin resistance, metabolic syndrome, obesity and diabetes which if  
30 207 uncontrolled leads to CKD incidence<sup>21 22</sup>. Other studies<sup>23 24</sup> have suggested that stress attributable to social  
31 208 and/or economic disadvantage is associated with CKD development and progression through an interaction  
32 209 between other psychosocial factors and comorbid behaviors such as alcohol, tobacco and drug use<sup>25</sup>. In  
33 210 addition, undernutrition due to stress adversely impact on fetal environment by impeding fetal growth  
34 211 leading to low birth weight, which has been shown to be associated with CKD in adult life<sup>25 26</sup>.

35 212  
36 213 However, studies linking psychosocial stressors (PS) to CKD prevalence and progression vary greatly  
37 214 among different geographical populations.<sup>5 16 27-31</sup>. Specifically, in the USA whereas no association was

1  
2  
3 215 found between PS and CKD <sup>31-33</sup> another study reported lower prevalence of CKD was associated with  
4 216 greater life stressors at baseline <sup>31</sup>. In contrast, in the Netherlands depressive and anxiety symptoms were  
5  
6 217 observed to be common among CKD patients and such patients had increased risk of poor clinical outcomes  
7  
8 218 <sup>28</sup>. Similarly, a study conducted in Korea reported a positive relationship between depressive symptoms and  
9  
10 219 CKD <sup>27</sup>. These observations suggest differential impact of PS at different geographical locations. For  
11  
12 220 example, discrimination among migrants may differ greatly between host population and from their SSA  
13  
14 221 compatriots. Specifically, some studies have reported differences in PS among rural and urban populations  
15  
16 222 <sup>34</sup>.  
17  
18 223 Current literature on the association between PS and CKD among sub-Saharan African populations and  
19  
20 224 their migrants in Europe is scanty and uncertain. We therefore sought to determine the association between  
21  
22 225 PS and CKD prevalence among Ghanaians in rural and urban Ghana and their migrants living in three  
23  
24 226 European cities. Furthermore, we examined the influence of psychosocial stressors on risk factors (obesity,  
25  
26 227 diabetes and hypertension) of CKD.

## 228 229 **Methods**

### 230 231 *Study population and study design*

232  
233 For this study, data from the Research on Obesity & Diabetes among African Migrants (RODAM) study, a  
234  
235 multi-centre cross sectional study, were used. The rationale, conceptual framework, design and  
236  
237 methodology of the RODAM study have been described in detail elsewhere <sup>12 13 35 36</sup>. To summarize, the  
238  
239 study was conducted from 2012 to 2015. Ghanaians aged 25–70 years living in rural and urban communities  
240  
241 in Ghana as well as in three European cities (Amsterdam, Berlin and London) were included in this study.  
242  
243 We standardized data collection across all sites. The ethics committees in Ghana, the Netherlands, Germany  
244  
245 and the UK approved the study protocol prior to data collection. Informed consent was obtained from each  
246  
247 participant prior to enrollment in the study. In Ghana, participants were randomly drawn from a list of 30  
248  
249 enumeration areas in the Ashanti region based on the 2010 population census. These enumeration areas  
250  
251 came from both rural areas and two purposively selected urban cities (Kumasi and Obuasi). For Ghanaians  
252  
253 in Amsterdam, we randomly drew participants from the Municipal register. This register holds data on  
254  
255 country of birth of citizens and their parents, thus allowing for sampling based on the Dutch standard  
256  
257 indicator for ethnic origin. London lacked a population register for migrant groups. Thus, Ghanaian  
258  
259 organizations served as sampling frame for the study. Lists of these organizations were obtained from the  
260  
261 Ghanaian Embassy and the Association of Ghanaian Churches in the UK in the boroughs known to have  
262  
263 the greatest concentration of Ghanaians. Members were selected from the lists of all members of these  
264  
265 organizations. In Berlin, the registration office of the federal state of Berlin provided a list of Ghanaian

1  
2  
3 250 individuals in Berlin but this resulted in low response rate. Because of this, a change was made to use lists  
4  
5 251 of Ghanaian churches and organizations as the sampling frame. Across all sites in Europe, all selected  
6  
7 252 participants were sent a written invitation combined with written information (information sheet) regarding  
8  
9 253 the study and a response card. The participants were contacted by phone to schedule a date and location of  
10  
11 254 the interview with a trained research assistant or opt for the self-administration of the paper questionnaire  
12  
13 255 or digital online version depending on the preference of the participant. After the completion of the  
14  
15 256 questionnaire, a date for physical examination was then scheduled after a positive response. The participants  
16  
17 257 were instructed to fast from 10.00 p.m. the night before the physical examination. The response rate was  
18  
19 258 76% in rural Ghana and 74% in urban Ghana. In London, of those individuals who were registered in the  
20  
21 259 various Ghanaian organizations and were invited, 75% agreed and participated in the study, while in Berlin,  
22  
23 260 this figure was 68%, and 53% in Amsterdam. For the current study, 5898 participants with data available  
24  
25 261 on both questionnaire data and physical measurements were used. Individuals who were outside the age  
26  
27 262 range of 25–70 years (n=239) were excluded because not all the study sites had individuals outside this age  
28  
29 263 range resulting in 5659 individuals comprising of 2492 from rural and urban Ghana and 3167 from the three  
30  
31 264 European cities. In the conduct of analysis, we further excluded individuals with no data on CKD and all  
32  
33 265 other indicators (n=52), resulting in a data set of 5607 participants for analysis.

## 34 266

### 35 267 **Measurements**

### 36 268

### 37 269 **Covariates**

#### 38 270 *Demographic and lifestyle factors*

39 271 For this study, we obtained information on demographics, educational level and lifestyle factors (smoking  
40  
41 272 and physical activity) by questionnaire. Physical examinations were performed across all sites using  
42  
43 273 validated devices per standardized operational procedures. Educational level was based on the highest  
44  
45 274 qualification gained either in the Netherlands or in the country of origin and was classified into 4 groups:  
46  
47 275 those who have never been to school or had elementary schooling only, those with lower vocational  
48  
49 276 schooling or lower secondary schooling, those with intermediate vocational schooling or  
50  
51 277 intermediate/higher secondary education schooling, and those with higher vocational schooling or  
52  
53 278 university. The four categories were further categorized into three categories by combining the second and  
54  
55 279 third categories. Smoking status was determined from the response to the question “Do you smoke at all?”  
56  
57 280 and was classified into nonsmokers and current smokers. Physical activity was assessed using the WHO  
58  
59 281 Global Physical Activity Questionnaire V.2. Weight was measured in light clothing and without shoes with  
60  
282 SECA 877 scales to the nearest 0.1 kg. Height was measured without shoes with a portable stadiometer  
283  
(SECA 217) to the nearest 0.1 cm. Body mass index (BMI) was calculated as weight (kg) divided by height

1  
2  
3 284 squared (m<sup>2</sup>). Overweight was defined as BMI of 25 to < 30 kg/m<sup>2</sup> and obesity as BMI ≥30 kg/m<sup>2</sup>. Waist  
4 285 circumference was measured in centimetres at the midpoint between the lower rib and the upper margin of  
5 286 the iliac crest. We used the same assessor for each participant in measuring all anthropometrics and each  
6 287 was measured twice; the average of the two measurements was used for analyses.

9 288 ***Predictor: SS***

11  
12 289 For this study, four constructs of psychosocial stress (discrimination, perceived stress at work or at home,  
13 290 negative life events and depressive symptoms) were used as explanatory variables.

15 291 ***Perceived discrimination***

16 292 Everyday discrimination as perceived by participants was reported as routinely experiencing instances of  
17 293 unfair treatment. We used the Everyday Discrimination Scale (EDS). The EDS comprises of a 9-items  
18 294 which rates the frequency at which participants experience daily mistreatment and it focuses on being  
19 295 treated with less courtesy or less respect, receiving poorer service than other people or being called names  
20 296 or insulted. Participants had the option of rating each of the 9-items from “never” = 1 to “very often” = 5.  
21 297 The obtained scores were summed and an average of the scores was computed to obtain a final score of 1  
22 298 to 5. This scale was used because it is commonly used for self-reported discrimination <sup>37</sup>, with consistent  
23 299 high reliability among a variety of ethnicities <sup>38</sup>, comprising African migrants in the Netherland <sup>39</sup>.

30 300 ***Perceived stress at work or at home***

31 301 We defined perceived stress at work or at home as “sense of irritation, filled with anxiety, or as having  
32 302 difficulties in sleeping because of circumstances at work or at home”. We used the psychological stress  
33 303 scale created by the INTERHEART study <sup>40</sup>. Participants in the study were asked about their opinion on  
34 304 frequency of stress at work and at home, and could answer “never”, “some periods”, “several periods”, or  
35 305 “continually”. Both answers were then combined into a composite score and graded into four categories:  
36 306 never experienced to experienced permanent stress at home or at work <sup>40</sup>. Due to the very small numbers in  
37 307 the permanent periods of stress group, we combined experienced several periods of stress at home or at  
38 308 work and permanent periods of stress at home or at work.

44 309  
45 310  
46 311 ***Negative life events***

47 312 The presence of major negative life events among participants was perceived as any event that could cause  
48 313 acute stress to an individual. We therefore applied the well-validated and widely used List of Threatening  
49 314 Experiences (LTE) <sup>41 42</sup>. The scale comprised of 12 unpleasant events participants perceived to have  
50 315 experienced in the past 12 months. We used a slightly-altered version of LTE consisting of 9 unpleasant  
51 316 items. We dichotomized participants into two groups namely “no negative life events” and “one or more  
52 317 events” and participants in the second category were expected to have higher levels of stress <sup>42</sup>.

### 318 *Depressive symptoms*

319 Depressive symptoms were measured by the 9-item Patient Health Questionnaire (PHQ-9). The PHQ-9  
320 consists of nine items, with a response scales 0 'not at all', 1 'on several days', 2 'on more than half of the  
321 days' and 3 'nearly every day'. A participant was considered to be in a significant depressed mood (SDM)  
322 when one or both of the items 1 (little interest or pleasure in doing things) and 2 (feeling down, depressed,  
323 or hopeless) were answered with at least 'on more than half of the days', and at least 5 of the 9 items were  
324 answered with at least 'on more than half of the days'<sup>43</sup>.

### 325 *Co-morbidity factors*

326 Blood pressure (BP) was measured three times using a validated semi-automated device (The Microlife  
327 WatchBP home) with appropriate cuffs in a sitting position after at least 5min rest. The mean of the last  
328 two BP measurements was used in the analyses. Hypertension was defined as systolic BP 140mmHg and/or  
329 diastolic BP 90mmHg, and/or being on antihypertensive medication treatment, and/or self-reported  
330 hypertension. Trained research assistants in all sites collected fasting venous blood samples according to  
331 standard operation procedures, and then temporarily stored at the local research location. The stored blood  
332 samples from the local research centres were transported to Berlin, Germany, according to standardized  
333 procedures, for biochemical analyses. This was done to avoid intra-laboratory variability. Fasting plasma  
334 glucose concentration was measured using an enzymatic method (hexokinase). We defined Type 2 diabetes  
335 according to the World Health Organization diagnostic criteria (fasting glucose 7.0mmol/L, and/or current  
336 use of medication prescribed to treat diabetes, and/or self-reported diabetes)<sup>44</sup>. We assessed concentration  
337 of total cholesterol using colorimetric test kits. All biochemical analyses were performed using an ABX  
338 Pentra 400 Chemistry Analyzer (ABX Pentra; Horiba 90 ABX, Germany). Hypercholesterolaemia was  
339 defined as total cholesterol level  $\geq 6.22$ mmol/L. Serum creatinine concentration (in mol/L) was determined  
340 by a kinetic colorimetric spectrophotometric isotope dilution mass spectrometry calibration method (Roche  
341 Diagnostics).

### 342 **Outcome: CKD prevalence**

343 We asked participants to bring an early morning urine sample for the analyses of albuminuria and creatinine  
344 levels. Urinary albumin concentration (in  $\mu$ mol/L) was measured by an immunochemical turbidimetric  
345 method (Roche Diagnostics). Urinary creatinine concentration (in 1 mol/L) was measured by a kinetic  
346 spectrophotometric method (Roche Diagnostics). Extensive quality checks were done inclusive of blinded  
347 serial measurements. Estimated glomerular filtration rate (eGFR) was calculated using the CKDEPI (CKD  
348 Epidemiology Collaboration) creatinine equation<sup>45</sup>. Urinary albumin-creatinine ratio (ACR; expressed in  
349 mg/mmol) was calculated by taking the ratio between urinary albumin and urinary creatinine. eGFR and



1  
2  
3 350 albuminuria were categorized according to the 2012 KDIGO classification <sup>46</sup>. eGFR was categorized as  
4  
5 351 follows: G1, 90mL/min/1.73m<sup>2</sup> (normal kidney function); G2, 60–89mL/min/1.73m<sup>2</sup> (mildly decreased);  
6  
7 352 G3a, 45–59mL/min/1.73m<sup>2</sup> (mildly to moderately decreased); G3b, 30–44mL/min/1.73m<sup>2</sup> (moderately to  
8  
9 353 severely decreased); G4, 15–29 mL/min/1.73 m<sup>2</sup> (severely decreased); and G5, <15mL/min/1.73m<sup>2</sup> (kidney  
10  
11 354 failure). Albuminuria categories were derived from ACR and were as follows: A1, < 3mg/mmol (normal  
12  
13 355 to mildly increased); A2, 3–30mg/mmol (moderately increased); and A3, > 30mg/mmol (severely  
14  
15 356 increased). CKD risk was categorized according to severity of kidney disease (green, low risk; yellow,  
16  
17 357 moderately increased risk; orange, high risk; and red, very high risk) using the combination of eGFR (G1–  
18  
19 358 G5) and albuminuria (A1–A3) levels defined by the 2012 KDIGO guideline <sup>47</sup>. Due to the small number of  
20  
21 359 participants in the very high-risk category of CKD (n=27), the high and very high-risk groups were  
22  
23 360 combined. Because of the small number of participants in the severely increased albuminuria category (A3,  
24  
25 361 n=62), we defined albuminuria as ACR 3mg/ mmol by combining the moderately increased (A2) and  
26  
27 362 severely increased (A3) categories.

28  
29 363  
30  
31 364 Covariates assessed were age, sex, educational level and length of stay in Europe, hypertension and  
32  
33 365 diabetes. Length of stay was assessed for Ghanaian migrants only. Length of stay was defined as the number  
34  
35 366 of years lived in Europe at the time of data collection. Length of stay was controlled for due to evidence  
36  
37 367 suggesting that it influences mental health <sup>48</sup>. Other covariates were hypertension, obesity and diabetes.

### 38 368 39 369 ***Patient and Public Involvement***

40  
41 370 Community leaders were involved in the recruitment of patients. These comprised of religious communities  
42  
43 371 (churches and mosques), endorsement from local key leaders and establishing relationships with healthcare  
44  
45 372 organizations. We also provided information on the study by involving the local media (radio and television  
46  
47 373 stations). We sent letters to all selected health and community authorities to notify participants of the study.  
48  
49 374 Team members were sent to the various communities to stay among the community and organize mini  
50  
51 375 clinics for a period of 1-2 weeks. Results of the study were disseminated through seminars, durbars and via  
52  
53 376 radio and television stations.

### 54 377 ***Statistical methods***

55  
56 378 Characteristics of participants were expressed as absolute numbers and percentages for categorical variables  
57  
58 379 and means and standard deviations for continuous variables. The z-test for proportions was used to compare  
59  
60 380 proportions of demographic and clinical variables among the various sites and the independent t-test was  
61  
62 381 also used to test for mean differences between the two sites. Odds Ratios (ORs) and their corresponding  
63  
64 382 95% confidence intervals (CIs) were estimated by means of binary logistic regression analyses to study the

1  
2  
3 383 associations of albuminuria (ACR>3 mg/mmol, A2-A3, moderately to severely increased albuminuria),  
4 384 reduced kidney function (eGFR< 60 mL/min/1.73m<sup>2</sup>, G3-G5 moderately to severely decreased kidney  
5 385 function) and increased CKD risk (high and very high CKD risk), with adjustments for covariates<sup>49</sup>. The  
6 386 Spearman's correlation test was used to test for associations between all four constructs of PS. Three models  
7 387 were used to examine the data. Model 1 was adjusted for age and sex, model 2 was adjusted for age and  
8 388 sex and educational level for Ghanaians living in SSA while age, sex, educational level and length of stay  
9 389 for Ghanaians living in Europe<sup>50-52</sup>. Model 3 was adjusted for sex, age, educational level and conventional  
10 390 risk factors (hypertension, diabetes, hypercholesterolemia, BMI, physical activity and smoking status) of  
11 391 CKD. The analyses were performed for all 4 constructs of PS using individuals who have not experienced  
12 392 either of the PS per outcome as reference. All tests were stratified per sites due to interactions, Ghanaians  
13 393 living in SSA and Europe; Ghanaians living in rural and urban Ghana and Ghanaians living in Amsterdam,  
14 394 Berlin and London due to an observed interaction between PS and site. Furthermore, the analyses were  
15 395 stratified for those with and without obesity, diabetes, hypertension across all sites due to interactions  
16 396 between these disease risks. P-values less than 0.05 were interpreted as statistically significant. All analyses  
17 397 were performed using STATA, version 14.0 (StataCorp LP).

## 27 398 **Results**

### 29 399 *Characteristics of the study population*

30 400  
31 401 Participants characteristics are shown in Table 1. Ghanaians living in Ghana were significantly older than  
32 402 their peers living in Europe (47.7±11.9 versus 46.6±9.9, p=0.006). There were more female participants in the  
33 403 Ghana sample compared with European sample (67.1% versus 58.5%, p=0.001). Ghanaians living in  
34 404 Ghana were significantly less educated than those living in Europe. Higher proportion of Ghanaians living  
35 405 in Ghana had experienced negative life events in the last 12 months compared with their peers living in  
36 406 Europe (68.7% versus 59.0%, p=0.001). More than half of Ghanaians living in Ghana had experienced  
37 407 some stress at home or work whereas only a third of those living in Europe had experienced some stress at  
38 408 home or work (p=0.001). Permanent stress at home/work was fairly the same among Ghanaians living in  
39 409 SSA and Europe. Perceived discrimination was significantly higher among Ghanaians living in Europe  
40 410 compared with their peers living in Ghana (29.7% versus 4.8%, p=0.001). Depressive symptoms were more  
41 411 prevalent among Ghanaians living in Europe 7.5% compared with their peers living in Ghana 5.1%. Almost  
42 412 all Ghanaians living in Europe were first generation migrants. Ghanaians in Europe were significantly more  
43 413 obese, more likely to smoke and less physically active compared with their peers living in Ghana.  
44 414 Prevalence of hypercholesterolemia was significantly higher, but type 2 diabetes and hypertension were  
45 415 significantly lower among Ghanaians living in Ghana compared with their peers living in Europe (p=0.001).



416 Prevalence of albuminuria, reduced eGFR and CKD risk were higher in Ghanaians living in Ghana  
 417 compared with those living in Europe.

418

419

420

421

422 **Table 1: Baseline characteristics of respondents**

|                                                   | Ghanaians (SSA)<br>n (%) | Ghanaians (Europe)<br>n (%) | p-value |
|---------------------------------------------------|--------------------------|-----------------------------|---------|
| <b>N</b>                                          | 2,492 (44.1)             | 3,167 (55.9)                | 0.001   |
| <b>Female sex</b>                                 | 1672 (67.1)              | 1,851 (58.5)                | 0.001   |
| <b>Age (years)</b>                                | 47.7±11.9                | 46.6±9.9                    | 0.006   |
| <b>Educational status</b>                         |                          |                             |         |
| Low                                               | 1169 (49.2)              | 635 (21.8)                  | 0.001   |
| Middle                                            | 858 (36.1)               | 1111 (38.1)                 |         |
| High                                              | 347 (14.6)               | 1168 (40.1)                 |         |
| <b>Negative life events in the past 12 months</b> |                          |                             |         |
| No                                                | 739 (31.3)               | 1158 (41.0)                 | 0.001   |
| Yes                                               | 1619 (68.7)              | 1667 (59.0)                 |         |
| <b>Perceived stress at home/work</b>              |                          |                             |         |
| Never                                             | 692 (29.4)               | 1371 (48.8)                 | 0.001   |
| Some periods                                      | 1290 (54.7)              | 1033 (36.8)                 |         |
| Several/Permanent                                 | 375 (15.9)               | 407 (14.4)                  |         |
| <b>Perceived discrimination</b>                   |                          |                             |         |
| No                                                | 2065 (95.2)              | 1960 (70.3)                 | 0.001   |
| Yes                                               | 104 (4.8)                | 829 (29.7)                  |         |
| <b>Depressive symptoms</b>                        |                          |                             |         |
| No                                                | 2239 (94.9)              | 2582 (92.5)                 | 0.001   |

|                                        |                |              |                |
|----------------------------------------|----------------|--------------|----------------|
| <b>Yes</b>                             | 119 (5.1)      | 209 (7.5)    |                |
| <b>Migration generation</b>            |                |              |                |
| First                                  | Not applicable | 2868 (98.7)  | Not applicable |
| Second                                 | Not applicable | 38 (1.3)     | Not applicable |
| <b>BMI</b>                             |                |              |                |
| Normal (<25kg/m <sup>2</sup> )         | 1373 (55.2)    | 643 (20.4)   | 0.001          |
| Overweight (25 ≤ 30kg/m <sup>2</sup> ) | 684 (27.5)     | 1,350 (42.8) |                |
| Obese (>30kg/m <sup>2</sup> )          | 432 (17.3)     | 1163 (36.8)  |                |
| Currently smoking                      | 36 (1.5)       | 121 (4.1)    | 0.001          |
| <b>Physical activity</b>               | 1255 (52.8)    | 1131 (44.0)  | 0.001          |
| <b>Hypocholesteraemia</b>              | 352 (14.2)     | 354 (11.3)   | 0.007          |
| <b>Type 2 diabetes</b>                 | 206 (8.3)      | 444 (14.0)   | 0.001          |
| <b>Hypertension</b>                    | 837 (33.6)     | 1801 (56.9)  | 0.001          |
| <b>ACR</b>                             |                |              |                |
| A1 < 3mg/mmol                          | 2215 (90.2)    | 2814 (91.8)  | 0.001          |
| A2-A ≥ 3mg/mmol                        | 243 (9.8)      | 252 (8.2)    |                |
| <b>eGFR</b>                            |                |              |                |
| G1-G2 ≥ 60 mL/min/1.73 m <sup>2</sup>  | 2377 (96.3)    | 2936 (97.4)  | 0.018          |
| G3a-G5 < 60 mL/min/1.73 m <sup>2</sup> | 85 (3.7)       | 78 (2.6)     |                |
| <b>CKD Risk</b>                        |                |              |                |
| Low risk                               | 2197 (89.6)    | 2705 (91.5)  | 0.015          |
| Moderate-very high risk                | 256 (10.4)     | 252 (8.5)    |                |

**Abbreviations:** N, number of respondents; BMI, body mass index; eGFR, estimated glomerular filtration rate; G1-G2, normal to high kidney function to mildly decreased; G3a-G5, mildly to moderately decreased to Kidney failure; ACR, albumin creatinine ratio; A1, normal to mildly increased; A2-A3, moderately increased to severely increased; CKD, Chronic kidney disease; SSA, Sub-Saharan Africa; CI, confidence intervals.

### 429 *Association between PS and CKD*

430 Figure 1-4 shows CKD prevalence by negative life events in the past 12 months among Ghanaians living  
 431 in Ghana and Europe. In Europe, CKD prevalence was fairly the same among those who had experienced  
 432 any negative life events compared with those who had not in the last 12 months. Prevalence of CKD was  
 433 higher among Ghanaians who had not experienced any negative life events in the past 12 months (10.9%)

434 compared with those who had experienced some negative life events (9.9%) and living in Ghana. CKD  
 435 prevalence was higher among Ghanaians who had not experienced any form of discrimination (10.6%) than  
 436 those who had (6.7%) in Ghana as well as in Europe (Figure 2). CKD prevalence was slightly higher among  
 437 Ghanaians who had experienced several/permanent stress at work/home in the past 12 months and living  
 438 in Ghana (10.4%) or Europe (9.7%) (Figure 3). Ghanaians who did not report any form of depressive  
 439 symptoms had a significantly higher CKD prevalence than those who did and living in Ghana (10.4%) and  
 440 Europe (8.7%) (Figure 4).

441  
 442 Table 2 shows the correlation matrix between the 4 constructs of PS among Ghanaians living in Ghana and  
 443 those living in Europe. All four constructs of PS were positively correlated with each other among  
 444 Ghanaians living in Europe and Ghanaians living in Ghana ( $p < 0.001$ ), except stress at work/home and  
 445 discrimination among Ghanaians living in Ghana.

446

447 **Table 2: Relationship between PS constructs (negative life events, discrimination, stress at**  
 448 **work or home and depression) by Ghanaians (SSA) and Ghanaians (Europe)**

449

450

| Correlation matrix  | Negative events | Discrimination | Stress at work/home | Depression |
|---------------------|-----------------|----------------|---------------------|------------|
| <b>Europe</b>       |                 |                |                     |            |
| Negative events     | 1.000           |                |                     |            |
| Discrimination      | <b>0.152**</b>  | 1.000          |                     |            |
| Stress at work/home | <b>0.297**</b>  | <b>0.161**</b> | 1.000               |            |
| Depressive symptoms | <b>0.143**</b>  | <b>0.136**</b> | <b>0.285**</b>      | 1.000      |
| <b>Ghana</b>        |                 |                |                     |            |
| Negative events     | 1.000           |                |                     |            |
| Discrimination      | <b>0.079**</b>  | 1.000          |                     |            |
| Stress at work/home | <b>0.101**</b>  | -0.032         | 1.000               |            |
| Depressive symptoms | <b>0.091**</b>  | 0.042          | <b>0.185**</b>      | 1.000      |

451 **\*\*Significant at 1%, Spearman's correlation**

452

453 Table 3 shows association between all 4 constructs of PS and CKD among Ghanaians living in Ghana and  
 454 those living in Europe. There was no statistically significant association between PS and albuminuria,  
 455 reduced eGFR and CKD risk among Ghanaians living in Ghana and those living in Europe except  
 456 individuals living in Europe with some stress and lower risk of reduced eGFR (0.46, 95% C.I. 0.24-0.88).

1  
2  
3 457 Table S1 shows further adjustments for conventional risk factors of CKD. This did not show any  
4  
5 458 statistically significant associations between PS and albuminuria, reduced eGFR and CKD risk  
6  
7 459 among Ghanaians living in Ghana and Europe (Table S1). Table S2 shows further stratification  
8  
9 460 based on obesity status. We did not find any association between PS and CKD for obese participants and  
10  
11 461 those who were not obese for Ghanaians living in rural and urban Ghana and those living in Europe.  
12  
13 462 However, we observed an inverse association between PS and CKD among migrants who were not obese  
14  
15 463 but have experienced discrimination for the past 12 months (0.63 95% C.I. 0.41-0.97) (Table S2). In Table  
16  
17 464 S3 we stratified our analysis based on diabetic status. We did not find any associations between PS and  
18  
19 465 CKD for participants with and without diabetes for both Ghanaians living in rural and urban Ghana and  
20  
21 466 their migrant peers in Europe (Table S3). Finally, Table S4 stratified analysis by hypertension status. No  
22  
23 467 associations were observed between PS and CKD for individuals who had hypertension and those who did  
24  
25 468 not have hypertension for both those living in rural and urban Ghana as well as their compatriots living in  
26  
27 469 Europe. An inverse association was observed between PS and CKD among Ghanaians who have  
28  
29 470 experienced discrimination in the last 12 months with no hypertension and living in Europe (0.51, 95% C.I.  
30  
31 471 0.27-0.97). Also, we observed that having experienced some stress at home/work was inversely associated  
32  
33 472 with reduced eGFR among Ghanaians with hypertension and living in Europe (0.47, 95% C.I. 0. 0.23-0.95)  
34  
35 473 (Table S4).  
36  
37 474  
38  
39 475  
40  
41 476  
42  
43 477  
44  
45 478  
46  
47 479  
48  
49 480  
50  
51 481  
52  
53 482  
54  
55  
56  
57  
58  
59  
60

483

484 **Table 3: Association of psychosocial stressors (PS) indicators (negative life events, discrimination, stress at work/home and depression) with**  
 485 **albuminuria, reduced eGFR and CKD risk for Ghanaians living in Ghana and those living in Europe**

486

|                            | Albuminuria (ACR $\geq$ 3 mg/mmol) |                  |                   | eGFR < 60 mL/min/1.73 m <sup>2</sup> |                         |                         | High to very high CKD risk (KDIGO, 2012) |                  |                  |
|----------------------------|------------------------------------|------------------|-------------------|--------------------------------------|-------------------------|-------------------------|------------------------------------------|------------------|------------------|
|                            | n (%)                              | OR (95% CI)      |                   | n (%)                                | OR (95% CI)             |                         | n cases (%)                              | OR (95% CI)      |                  |
|                            |                                    | Model 1          | Model 2           |                                      | Model 1                 | Model 2                 |                                          | Model 1          | Model 2          |
| <b>Negative events</b>     |                                    |                  |                   |                                      |                         |                         |                                          |                  |                  |
| <b>Europe</b>              |                                    |                  |                   |                                      |                         |                         |                                          |                  |                  |
| No                         | 1128 (8.2)                         | 1.00 (Reference) | 1.00 (Reference)  | 1106 (2.6)                           | 1.00 (Reference)        | 1.00 (Reference)        | 1090 (8.5)                               | 1.00 (Reference) | 1.00 (Reference) |
| Yes                        | 1615 (8.4)                         | 1.03 (0.78-1.35) | 1.07 (0.80-1.42)  | 1587 (2.5)                           | 0.86 (0.53-1.42)        | 0.83 (0.49-1.39)        | 1557 (8.6)                               | 0.97 (0.76-1.32) | 0.99 (0.74-1.32) |
| <b>Ghana</b>               |                                    |                  |                   |                                      |                         |                         |                                          |                  |                  |
| No                         | 732 (8.7)                          | 1.00 (Reference) | 1.00 (Reference)  | 736 (4.5)                            | 1.00 (Reference)        | 1.00 (Reference)        | 732 (10.9)                               | 1.00 (Reference) | 1.00 (Reference) |
| Yes                        | 1595 (3.8)                         | 0.87 (0.65-1.16) | 0.85 (0.63-1.14)  | 1601 (3.4)                           | 0.69 (0.45-1.08)        | 0.67 (0.44-1.09)        | 1590 (9.9)                               | 0.88 (0.66-1.17) | 0.86 (0.64-1.15) |
| <b>Discrimination</b>      |                                    |                  |                   |                                      |                         |                         |                                          |                  |                  |
| <b>Europe</b>              |                                    |                  |                   |                                      |                         |                         |                                          |                  |                  |
| No                         | 1899 (8.5)                         | 1.00 (Reference) | 1.00 (Reference)  | 1867 (2.6)                           | 1.00 (Reference)        | 1.00 (Reference)        | 1832 (8.9)                               | 1.00 (Reference) | 1.00 (Reference) |
| Yes                        | 810 (7.4)                          | 0.87 (0.64-1.19) | 0.92 (0.67-1.26)  | 791 (2.2)                            | 0.83 (0.47-1.47)        | 0.84 (0.46-1.52)        | 782 (7.3)                                | 0.82 (0.59-1.12) | 0.84 (0.60-1.16) |
| <b>Ghana</b>               |                                    |                  |                   |                                      |                         |                         |                                          |                  |                  |
| No                         | 2034 (10.0)                        | 1.00 (Reference) | 1.00 (Reference)  | 2047 (3.9)                           | 1.00 (Reference)        | 1.00 (Reference)        | 2031 (10.6)                              | 1.00 (Reference) | 1.00 (Reference) |
| Yes                        | 104 (7.7)                          | 0.83 (0.39-1.73) | 0.91 (0.67-1.24)  | 104 (1.9)                            | 0.67 (0.15-2.85)        | 0.67 (0.16-2.84)        | 104 (6.7)                                | 0.70 (0.32-1.55) | 0.71 (0.32-1.55) |
| <b>Stress at home/work</b> |                                    |                  |                   |                                      |                         |                         |                                          |                  |                  |
| <b>Europe</b>              |                                    |                  |                   |                                      |                         |                         |                                          |                  |                  |
| Never                      | 1330 (8.2)                         | 1.00 (Reference) | 1.00 (Reference)  | 1305 (3.4)                           | 1.00 (Reference)        | 1.00 (Reference)        | 1282 (8.5)                               | 1.00 (Reference) | 1.00 (Reference) |
| Some stress                | 1002 (7.9)                         | 0.97 (0.72-1.31) | 1.04 (0.76-1.42)  | 984 (1.4)                            | <b>0.47 (0.26-0.87)</b> | <b>0.46 (0.24-0.88)</b> | 968 (8.6)                                | 0.96 (0.71-1.30) | 1.02 (0.74-1.39) |
| Several/Permanent stresses | 397 (9.1)                          | 1.11 (0.74-1.64) | 1.153 (0.77-1.72) | 390 (2.3)                            | 0.73 (0.35-1.52)        | 0.76 (0.36-1.61)        | 383 (9.7)                                | 1.13 (0.77-1.68) | 1.19 (0.80-1.79) |
| <b>Ghana</b>               |                                    |                  |                   |                                      |                         |                         |                                          |                  |                  |
| Never                      | 682 (10.3)                         | 1.00 (Reference) | 1.00 (Reference)  | 688 (3.3)                            | 1.00 (Reference)        | 1.00 (Reference)        | 682 (9.9)                                | 1.00 (Reference) | 1.00 (Reference) |

|    |                            |            |                  |                  |            |                  |                  |             |                  |                  |
|----|----------------------------|------------|------------------|------------------|------------|------------------|------------------|-------------|------------------|------------------|
| 1  |                            |            |                  |                  |            |                  |                  |             |                  |                  |
| 2  |                            |            |                  |                  |            |                  |                  |             |                  |                  |
| 3  | Some stress                | 1279 (9.5) | 0.87 (0.64-1.19) | 0.80 (0.59-1.11) | 1279 (3.9) | 1.06 (0.63-1.77) | 1.11 (0.66-1.87) | 1274 (10.3) | 0.95 (0.69-1.30) | 0.92 (0.67-1.26) |
| 4  | Several/Permanent stresses | 365 (8.5)  | 0.75 (0.48-1.18) | 0.68 (0.59-1.11) | 369 (4.1)  | 1.13 (0.57-2.23) | 1.22 (0.61-2.46) | 365 (10.4)  | 0.96 (0.63-1.47) | 0.92 (0.59-1.42) |
| 5  |                            |            |                  |                  |            |                  |                  |             |                  |                  |
| 6  | <b>Depressive symptoms</b> |            |                  |                  |            |                  |                  |             |                  |                  |
| 7  |                            |            |                  |                  |            |                  |                  |             |                  |                  |
| 8  | <b>Europe</b>              |            |                  |                  |            |                  |                  |             |                  |                  |
| 9  |                            |            |                  |                  |            |                  |                  |             |                  |                  |
| 10 | No                         | 2505 (8.5) | 1.00 (Reference) | 1.00 (Reference) | 2457 (2.7) | 1.00 (Reference) | 1.00 (Reference) | 2416 (8.7)  | 1.00 (Reference) | 1.00 (Reference) |
| 11 | Yes                        | 206 (6.3)  | 0.71 (0.39-1.27) | 0.76 (0.43-1.36) | 202 (1.5)  | 0.63 (0.19-2.03) | 0.68 (0.21-2.23) | 199 (7.1)   | 0.78 (0.44-1.37) | 0.83 (0.47-1.46) |
| 12 |                            |            |                  |                  |            |                  |                  |             |                  |                  |
| 13 | <b>Ghana</b>               |            |                  |                  |            |                  |                  |             |                  |                  |
| 14 | No                         | 2212 (9.9) | 1.00 (Reference) | 1.00 (Reference) | 2222 (3.8) | 1.00 (Reference) | 1.00 (Reference) | 2207 (10.4) | 1.00 (Reference) | 1.00 (Reference) |
| 15 | Yes                        | 114 (5.3)  | 0.45 (0.19-1.03) | 0.45 (0.19-1.01) | 114 (2.6)  | 0.52 (0.16-1.72) | 0.53 (0.17-1.74) | 114 (7.9)   | 0.62 (0.30-1.25) | 0.61 (0.30-1.24) |

16 **487** Model 1, adjusted for age and sex; Model 2, adjusted for age, sex, and educational level for Ghanaians (SSA) and length of stay for those in Europe; Abbreviations: CI, confidence interval; ACR,  
 17 **488** albumin creatinine ration; eGFR, estimated glomerular filtration rate; CKD, chronic kidney disease; OR, odds ratio, n= total number of Ghanaians living in Ghana and Europe among the various levels  
 18 **489** of PS constructs; %, proportion of individuals with CKD among the various levels of PS constructs in Ghana and Europe

1  
2  
3 490 Table 4 shows associations between all 4 constructs of PS and CKD stratified by Ghanaians living  
4  
5 491 in urban and rural Ghana. There was no association between PS and albuminuria, reduced eGFR  
6  
7 492 and CKD risk among Ghanaians living rural and urban Ghana.  
8  
9  
10  
11  
12  
13  
14  
15  
16  
17  
18  
19  
20  
21  
22  
23  
24  
25  
26  
27  
28  
29  
30  
31  
32  
33  
34  
35  
36  
37  
38  
39  
40  
41  
42  
43  
44  
45  
46  
47  
48  
49  
50  
51  
52  
53  
54  
55  
56  
57  
58  
59  
60

493

494 **Table 4: Association of psychosocial stressors (PS) indicators (negative life events, discrimination, stress at work/home and depressive symptoms) with**  
 495 **albuminuria, reduced eGFR and CKD risk among rural and urban Ghana**

496

497

|                            | Albuminuria (ACR $\geq$ 3 mg/mmol) |                  |                  | eGFR < 60 mL/min/1.73 m <sup>2</sup> |                  |                  | High to very high CKD risk (KDIGO, 2012) |                  |                  |
|----------------------------|------------------------------------|------------------|------------------|--------------------------------------|------------------|------------------|------------------------------------------|------------------|------------------|
|                            | n (%)                              | OR (95% CI)      |                  | n (%)                                | OR (95% CI)      |                  | n cases (%)                              | OR (95% CI)      |                  |
|                            |                                    | Model 1          | Model 2          |                                      | Model 1          | Model 2          |                                          | Model 1          | Model 2          |
| <b>Negative events</b>     |                                    |                  |                  |                                      |                  |                  |                                          |                  |                  |
| <b>Urban Ghana</b>         |                                    |                  |                  |                                      |                  |                  |                                          |                  |                  |
| No                         | 477 (11.9)                         | 1.00 (Reference) | 1.00 (Reference) | 477 (4.4)                            | 1.00 (Reference) | 1.00 (Reference) | 477 (12.2)                               | 1.00 (Reference) | 1.00 (Reference) |
| Yes                        | 912 (10.5)                         | 0.87 (0.61-1.23) | 0.87 (0.61-1.24) | 911 (3.4)                            | 0.73 (0.41-1.31) | 0.72 (0.40-1.29) | 910 (10.8)                               | 0.87 (0.61-1.24) | 0.87 (0.61-1.25) |
| <b>Rural Ghana</b>         |                                    |                  |                  |                                      |                  |                  |                                          |                  |                  |
| No                         | 255 (7.5)                          | 1.00 (Reference) | 1.00 (Reference) | 259 (4.6)                            | 1.00 (Reference) | 1.00 (Reference) | 255 (8.6)                                | 1.00 (Reference) | 1.00 (Reference) |
| Yes                        | 683 (7.6)                          | 0.97 (0.56-1.69) | 0.94 (0.54-1.64) | 690 (3.5)                            | 0.63 (0.31-1.31) | 0.66 (0.32-1.37) | 680 (8.8)                                | 0.93 (0.55-1.58) | 0.92 (0.54-1.56) |
| <b>Discrimination</b>      |                                    |                  |                  |                                      |                  |                  |                                          |                  |                  |
| <b>Urban Ghana</b>         |                                    |                  |                  |                                      |                  |                  |                                          |                  |                  |
| No                         | 1326 (11.1)                        | 1.00 (Reference) | 1.00 (Reference) | 1326 (3.9)                           | 1.00 (Reference) | 1.00 (Reference) | 1325 (11.4)                              | 1.00 (Reference) | 1.00 (Reference) |
| Yes                        | 71 (8.5)                           | 0.85 (0.36-2.00) | 0.89 (0.37-2.11) | 71 (2.8)                             | 1.17 (0.27-2.09) | 1.16 (0.27-2.06) | 71 (7.1)                                 | 0.69 (0.27-1.77) | 0.72 (0.28-1.83) |
| <b>Rural Ghana</b>         |                                    |                  |                  |                                      |                  |                  |                                          |                  |                  |
| No                         | 708 (8.1)                          | 1.00 (Reference) | 1.00 (Reference) | 721 (3.9)                            | 1.00 (Reference) | 1.00 (Reference) | 706 (9.2)                                | 1.00 (Reference) | 1.00 (Reference) |
| Yes                        | 33 (6.1)                           | 0.79 (0.18-3.47) | 0.84 (0.19-2.65) | 33 (0.0)                             | ***              | ***              | 33 (6.1)                                 | 0.75 (0.17-2.89) | 0.83 (0.19-2.65) |
| <b>Stress at home/work</b> |                                    |                  |                  |                                      |                  |                  |                                          |                  |                  |
| <b>Urban Ghana</b>         |                                    |                  |                  |                                      |                  |                  |                                          |                  |                  |
| Never                      | 460 (10.9)                         | 1.00 (Reference) | 1.00 (Reference) | 460 (3.3)                            | 1.00 (Reference) | 1.00 (Reference) | 460 (10.2)                               | 1.00 (Reference) | 1.00 (Reference) |
| Some stress                | 732 (11.5)                         | 1.04 (0.71-1.51) | 0.91 (0.62-1.37) | 730 (4.1)                            | 1.27 (0.66-2.43) | 1.30 (0.67-2.51) | 730 (11.8)                               | 1.13 (0.77-1.65) | 1.04 (0.71-1.53) |
| Several/Permanent stresses | 197 (9.6)                          | 0.87 (0.50-1.52) | 0.74 (0.42-1.02) | 198 (3.5)                            | 1.17 (0.46-2.84) | 1.20 (0.47-3.09) | 197 (11.7)                               | 1.15 (0.68-1.71) | 1.05 (0.61-1.81) |



**Rural Ghana**

|                            |           |                  |                  |           |                  |                  |           |                  |                  |
|----------------------------|-----------|------------------|------------------|-----------|------------------|------------------|-----------|------------------|------------------|
| Never                      | 222 (9.0) | 1.00 (Reference) | 1.00 (Reference) | 228 (3.5) | 1.00 (Reference) | 1.00 (Reference) | 222 (9.5) | 1.00 (Reference) | 1.00 (Reference) |
| Some stress                | 547 (6.9) | 0.69 (0.39-1.23) | 0.68 (0.38-1.22) | 549 (3.6) | 0.88 (0.38-2.07) | 0.92 (0.39-2.18) | 544 (8.3) | 0.74 (0.42-1.30) | 0.75 (0.42-1.31) |
| Several/Permanent stresses | 168 (7.1) | 0.63 (0.30-1.37) | 0.60 (0.28-1.29) | 171 (4.7) | 1.07(0.38-3.03)  | 1.21(0.43-3.46)  | 168 (8.9) | 0.71 (0.34-1.50) | 0.73 (0.35-1.50) |

**Depressive symptoms**

**Urban Ghana**

|     |             |                  |                  |            |                  |                  |             |                  |                  |
|-----|-------------|------------------|------------------|------------|------------------|------------------|-------------|------------------|------------------|
| No  | 1336 (11.3) | 1.00 (Reference) | 1.00 (Reference) | 1335 (3.8) | 1.00 (Reference) | 1.00 (Reference) | 1334 (11.5) | 1.00 (Reference) | 1.00 (Reference) |
| Yes | 52 (3.9)    | 0.30 (0.07-1.25) | 0.30 (0.07-1.27) | 52 (1.9)   | 0.46 (0.06-2.50) | 0.45 (0.06-2.13) | 52 (5.8)    | 0.44 (0.14-1.45) | 0.45 (0.14-1.48) |

**Rural Ghana**

|     |           |                  |                  |           |                  |                  |           |                  |                  |
|-----|-----------|------------------|------------------|-----------|------------------|------------------|-----------|------------------|------------------|
| No  | 876 (7.7) | 1.00 (Reference) | 1.00 (Reference) | 887 (3.8) | 1.00 (Reference) | 1.00 (Reference) | 873 (8.7) | 1.00 (Reference) | 1.00 (Reference) |
| Yes | 62 (6.5)  | 0.67 (0.23-1.94) | 0.67 (0.23-1.94) | 62 (3.2)  | 0.58 (0.13-2.56) | 0.61 (0.14-2.68) | 62 (9.7)  | 0.82 (0.33-2.01) | 0.85 (0.34-2.09) |

498 Model 1, adjusted for age and sex; Model 2, adjusted for age, sex, and educational level; Abbreviations: CI, confidence interval; ACR, albumin creatinine ration; eGFR, estimated glomerular filtration  
 499 rate; CKD, chronic kidney disease; OR, odds ratio, n= total number of Ghanaians living in urban and rural Ghana among the various levels of PS constructs; %, proportion of individuals with CKD  
 500 among the various levels of PS constructs in rural and urban Ghana. \*\*\*, no case of CKD and therefore odds ratios were not calculated

501  
502  
503  
504  
505  
506  
507  
508  
509  
510  
511  
512  
513  
514  
515  
516

1  
2  
3 517 Table 5 shows associations between all 4 constructs of PS and CKD stratified by Ghanaians living in  
4 518 Amsterdam, Berlin and London. There were no associations between PS and albuminuria, reduced eGFR  
5 519 and CKD risk among Ghanaians living in Europe except for positive association between stress at  
6 520 work/home and albuminuria (2.81, 95% C.I. 1.46-5.40) and CKD risk (2.78, 95% C.I. 1.43-5.43) among  
7 521 Ghanaians living in Berlin.  
8  
9  
10  
11  
12  
13  
14  
15  
16  
17  
18  
19  
20  
21  
22  
23  
24  
25  
26  
27  
28  
29  
30  
31  
32  
33  
34  
35  
36  
37  
38  
39  
40  
41  
42  
43  
44  
45  
46  
47  
48  
49  
50  
51  
52  
53  
54  
55  
56  
57  
58  
59  
60

522

523 **Table 5: Association of psychosocial stressors (PS) indicators (negative life events, discrimination, stress at work/home and depressive symptoms) with**  
 524 **albuminuria, reduced eGFR and CKD risk among Ghanaians in three European cities.**

525

526

|                            | Albuminuria (ACR $\geq$ 3 mg/mmol) |                  |                  | eGFR < 60 mL/min/1.73 m <sup>2</sup> |                  |                  | High to very high CKD risk (KDIGO, 2012) |                  |                  |
|----------------------------|------------------------------------|------------------|------------------|--------------------------------------|------------------|------------------|------------------------------------------|------------------|------------------|
|                            | n (%)                              | OR (95% CI)      |                  | n (%)                                | OR (95% CI)      |                  | n (%)                                    | OR (95% CI)      |                  |
|                            |                                    | Model 1          | Model 2          |                                      | Model 1          | Model 2          |                                          | Model 1          | Model 2          |
| <b>Negative events</b>     |                                    |                  |                  |                                      |                  |                  |                                          |                  |                  |
| <b>Amsterdam</b>           |                                    |                  |                  |                                      |                  |                  |                                          |                  |                  |
| No                         | 548 (7.3)                          | 1.00 (Reference) | 1.00 (Reference) | 534 (2.4)                            | 1.00 (Reference) | 1.00 (Reference) | 521 (7.5)                                | 1.00 (Reference) | 1.00 (Reference) |
| Yes                        | 784 (7.8)                          | 1.08 (0.71-1.63) | 1.18 (0.77-1.81) | 764 (2.9)                            | 1.11 (0.55-2.23) | 1.15 (0.55-2.37) | 742 (8.0)                                | 1.06 (0.69-1.62) | 1.08 (0.71-1.66) |
| <b>Berlin</b>              |                                    |                  |                  |                                      |                  |                  |                                          |                  |                  |
| No                         | 213 (9.9)                          | 1.00 (Reference) | 1.00 (Reference) | 213 (2.4)                            | 1.00 (Reference) | 1.00 (Reference) | 213 (10.8)                               | 1.00 (Reference) | 1.00 (Reference) |
| Yes                        | 329 (10.9)                         | 1.12 (0.63-1.99) | 1.19 (0.67-2.15) | 330 (1.8)                            | 0.64 (0.19-2.17) | 0.61 (0.18-2.11) | 329 (9.4)                                | 0.86 (0.48-1.52) | 0.91 (0.51-1.63) |
| <b>London</b>              |                                    |                  |                  |                                      |                  |                  |                                          |                  |                  |
| No                         | 367 (8.7)                          | 1.00 (Reference) | 1.00 (Reference) | 359 (3.1)                            | 1.00 (Reference) | 1.00 (Reference) | 356 (8.7)                                | 1.00 (Reference) | 1.00 (Reference) |
| Yes                        | 502 (7.8)                          | 0.89 (0.55-1.46) | 0.83 (0.49-1.41) | 493 (2.2)                            | 0.68 (0.28-1.65) | 0.58 (0.22-1.51) | 486 (9.1)                                | 1.04 (0.64-1.68) | 0.99 (0.58-1.68) |
| <b>Discrimination</b>      |                                    |                  |                  |                                      |                  |                  |                                          |                  |                  |
| <b>Amsterdam</b>           |                                    |                  |                  |                                      |                  |                  |                                          |                  |                  |
| No                         | 956 (8.3)                          | 1.00 (Reference) | 1.00 (Reference) | 935 (2.9)                            | 1.00 (Reference) | 1.00 (Reference) | 909 (8.5)                                | 1.00 (Reference) | 1.00 (Reference) |
| Yes                        | 363 (5.0)                          | 0.59 (0.34-1.00) | 0.59 (0.35-1.02) | 349 (2.1)                            | 0.69 (0.30-1.62) | 0.81 (0.34-1.91) | 342 (5.9)                                | 0.69 (0.41-1.14) | 0.69 (0.41-1.16) |
| <b>Berlin</b>              |                                    |                  |                  |                                      |                  |                  |                                          |                  |                  |
| No                         | 329 (10.0)                         | 1.00 (Reference) | 1.00 (Reference) | 329 (2.1)                            | 1.00 (Reference) | 1.00 (Reference) | 329 (10.3)                               | 1.00 (Reference) | 1.00 (Reference) |
| Yes                        | 209 (11.0)                         | 1.11 (0.63-1.95) | 1.16 (0.65-2.05) | 210 (1.9)                            | 0.83 (0.24-2.93) | 0.82 (0.23-2.91) | 209 (9.1)                                | 0.86 (0.48-1.56) | 0.89 (0.49-1.63) |
| <b>London</b>              |                                    |                  |                  |                                      |                  |                  |                                          |                  |                  |
| No                         | 614 (7.9)                          | 1.00 (Reference) | 1.00 (Reference) | 603 (2.5)                            | 1.00 (Reference) | 1.00 (Reference) | 594 (8.9)                                | 1.00 (Reference) | 1.00 (Reference) |
| Yes                        | 238 (7.9)                          | 1.03 (0.59-1.81) | 1.18 (0.65-2.15) | 232 (2.6)                            | 1.29 (0.46-3.59) | 1.09 (0.35-3.43) | 231 (7.8)                                | 0.93 (0.53-1.63) | 0.98 (0.52-1.82) |
| <b>Stress at home/work</b> |                                    |                  |                  |                                      |                  |                  |                                          |                  |                  |

**Amsterdam**

|                            |           |                  |                  |           |                  |                  |            |                  |                  |
|----------------------------|-----------|------------------|------------------|-----------|------------------|------------------|------------|------------------|------------------|
| Never                      | 634 (8.4) | 1.00 (Reference) | 1.00 (Reference) | 622 (3.2) | 1.00 (Reference) | 1.00 (Reference) | 603 (8.0)  | 1.00 (Reference) | 1.00 (Reference) |
| Some stress                | 478 (5.7) | 0.68 (0.42-1.11) | 0.69 (0.42-1.13) | 462 (1.9) | 0.64 (0.29-1.43) | 0.68 (0.30-1.52) | 452 (6.0)  | 0.74 (0.45-1.20) | 0.74 (0.45-1.22) |
| Several/Permanent stresses | 210 (9.1) | 1.09 (0.63-1.91) | 1.12 (0.64-1.95) | 204 (2.5) | 0.71 (0.26-1.95) | 0.77 (0.28-2.14) | 198 (10.1) | 1.24 (0.71-2.14) | 1.26 (0.73-2.20) |

**Berlin**

|                            |            |                         |                         |           |                  |                  |            |                         |                         |
|----------------------------|------------|-------------------------|-------------------------|-----------|------------------|------------------|------------|-------------------------|-------------------------|
| Never                      | 250 (9.0)  | 1.00 (Reference)        | 1.00 (Reference)        | 250 (2.0) | 1.00 (Reference) | 1.00 (Reference) | 250 (6.4)  | 1.00 (Reference)        | 1.00 (Reference)        |
| Some stress                | 196 (15.3) | <b>2.50 (1.33-4.71)</b> | <b>2.81 (1.46-5.40)</b> | 197 (1.5) | 0.88 (0.20-3.79) | 0.83 (0.19-3.62) | 196 (14.8) | <b>2.57 (1.34-4.90)</b> | <b>2.78 (1.43-5.43)</b> |
| Several/Permanent stresses | 96 (10.4)  | 1.64 (0.72-3.73)        | 1.69 (0.73-3.91)        | 197 (3.1) | 2.10 (0.47-9.46) | 2.04 (0.44-9.26) | 76 (9.4)   | 1.52 (0.65-3.58)        | 1.58 (0.66-3.75)        |

**London**

|                            |           |                  |                  |           |                  |                  |            |                  |                  |
|----------------------------|-----------|------------------|------------------|-----------|------------------|------------------|------------|------------------|------------------|
| Never                      | 446 (9.2) | 1.00 (Reference) | 1.00 (Reference) | 433 (4.4) | 1.00 (Reference) | 1.00 (Reference) | 429 (10.5) | 1.00 (Reference) | 1.00 (Reference) |
| Some stress                | 328 (7.0) | 0.73 (0.43-1.25) | 0.79 (0.44-1.40) | 325 (0.6) | 0.17 (0.04-0.73) | 0.09 (0.01-0.67) | 320 (6.9)  | 0.65 (0.38-1.10) | 0.66 (0.37-1.19) |
| Several/permanent stresses | 91 (7.7)  | 0.81 (0.35-1.87) | 0.86 (0.35-2.14) | 90 (1.1)  | 0.27 (0.03-2.12) | 0.24 (0.03-2.05) | 74 (8.9)   | 0.83 (0.38-1.83) | 0.92 (0.39-2.16) |

**Depressive symptoms**

**Amsterdam**

|     |            |                  |                  |            |                  |                  |            |                  |                  |
|-----|------------|------------------|------------------|------------|------------------|------------------|------------|------------------|------------------|
| No  | 1199 (7.8) | 1.00 (Reference) | 1.00 (Reference) | 1135 (2.8) | 1.00 (Reference) | 1.00 (Reference) | 1135 (7.9) | 1.00 (Reference) | 1.00 (Reference) |
| Yes | 121 (6.6)  | 0.81 (0.39-1.72) | 0.83 (0.39-1.76) | 118 (1.7)  | 0.65 (0.15-2.77) | 0.71 (0.16-3.06) | 116 (6.9)  | 0.83 (0.39-1.76) | 0.82 (0.38-1.74) |

**Berlin**

|     |            |                  |                  |           |                  |                  |            |                  |                  |
|-----|------------|------------------|------------------|-----------|------------------|------------------|------------|------------------|------------------|
| No  | 503 (10.7) | 1.00 (Reference) | 1.00 (Reference) | 504 (2.2) | 1.00 (Reference) | 1.00 (Reference) | 503 (10.1) | 1.00 (Reference) | 1.00 (Reference) |
| Yes | 34 (5.9)   | 0.53 (0.12-2.27) | 0.49 (0.11-2.13) | 34 (0.0)  | ***              | ***              | 34 (5.9)   | 0.55 (0.13-2.37) | 0.52 (0.12-2.24) |

**London**

|     |           |                  |                  |           |                  |                  |           |                  |                  |
|-----|-----------|------------------|------------------|-----------|------------------|------------------|-----------|------------------|------------------|
| No  | 803 (8.3) | 1.00 (Reference) | 1.00 (Reference) | 785 (2.6) | 1.00 (Reference) | 1.00 (Reference) | 778 (8.9) | 1.00 (Reference) | 1.00 (Reference) |
| Yes | 51 (5.9)  | 0.67 (0.20-2.21) | 0.91 (0.27-3.07) | 50 (2.0)  | 0.91 (0.11-7.43) | 1.15 (0.14-9.54) | 49 (8.2)  | 0.94 (0.33-2.69) | 1.30 (0.44-3.81) |

527 Model 1, adjusted for age and sex; Model 2, adjusted for age, sex, educational level and length of stay; Abbreviations: CI, confidence interval; ACR, albumin creatinine ratio; eGFR, estimated  
 528 glomerular filtration rate; CKD, chronic kidney disease; OR, odds ratio, n= total number of Ghanaians living in Amsterdam, Berlin and London among the various levels of PS constructs; %, proportion  
 529 of individuals with CKD among the various levels of PS constructs in Europe \*\*\*; no case of CKD and therefore odds ratios were not calculated.

## 530 Discussion

531

### 532 Key findings

533

534 Whereas there was an association between those who have experienced some stress at home/work and  
535 reduced eGFR among Ghanaians living in Europe, we did not find any association between PS and CKD  
536 among Ghanaians living in rural and urban Ghana and their peers in Europe. Also, PS was not associated  
537 with CKD for those living in rural and urban Ghana and neither for those living in the three European cities.  
538 However, there was an association between stress at work/home and albuminuria and CKD risk among  
539 Ghanaians living in Berlin. Further adjustment for conventional risk factors of CKD yielded similar results.

540

### 541 Discussion of key findings

542

#### 543 Association between PS and CKD in Ghana

544

545 Our study did not find any association between any of the four constructs of PS and prevalence of CKD  
546 (albuminuria, reduced eGFR and CKD risk) among Ghanaians living in rural and urban Ghana. Our findings  
547 are however in contrast with earlier studies which reported positive associations between PS and prevalent  
548 of CKD<sup>28 31 53</sup>. Other studies have hypothesised that the influence of PS on CKD may be important in only  
549 those with hypertension and diabetes and that PS may mediate or moderate the association between renal  
550 functioning and lifestyle behaviours such as smoking and physical activity<sup>33</sup>. For example, they argue that  
551 stress enhances Sympathetic Nervous System (SNS) activity to increase glucocorticoid secretion and  
552 inflammatory cytokines, which heavily contribute to hypertension, diabetes and vascular disease, which are  
553 major risk factors of CKD incidence and prevalence<sup>54</sup>. The lack of association between PS and CKD in  
554 this present study is unclear due to lack of literature on the association between PS and CKD prevalence  
555 particularly in rural and urban populations. Worth noting, however, is the presence of rich family support  
556 systems in the Ghanaian context especially in rural Ghana, which may help individuals with CKD to cope  
557 with PS thereby minimizing its effect. For example, patients with limited social networks and low social  
558 support have been shown to have augmented risk of morbidity and mortality<sup>55-57</sup>. Specifically, there is  
559 evidence that positive social support is a protective factor for persons dealing with long-term disease  
560 conditions<sup>58</sup>. Other studies have reported a protective relationship between social networks, emotionally  
561 supportive relationship and threats to physiological and psychosocial health<sup>59</sup>.

562

#### 563 Association between PS and CKD Amsterdam, Berlin and London

564

565 Literature on the association between PS and CKD prevalence among migrants is scant and absent in most  
566 European populations. The lack of positive association between PS and CKD in our study is consistent with

1  
2  
3 567 recent studies conducted among African Americans<sup>31 33</sup> and other populations<sup>32 60</sup>. Specifically, a recent  
4 568 study using data from the Jackson Heart Study, which comprised of extensive constructs of psychosocial  
5 569 variables reported that greater life stressors were associated with lower prevalence of CKD at baseline<sup>31</sup>.  
6  
7 570 Several studies in other parts of the world have reported a positive relationship between higher prevalence  
8  
9 571 of stressors and CKD risk<sup>27 28</sup>, although the study findings have been inconsistent. Whereas some did not  
10 572 find any associations among African Americans<sup>31</sup> others found associations in other populations. Even  
11 573 among those who found some associations the directions differed<sup>28</sup>. Reasons for the lack of association  
12 574 observed in our study among migrants are not fully understood but may reflect the real world situation.  
13  
14 575 First, migrants from Ghana practice both nuclear and extended family support system as their peers living  
15 576 in rural and urban, this practice may mitigate the impact of stressors such as unemployment, death of a love  
16 577 one, discrimination, etc. They also belong to several religious organisations such as churches, which  
17 578 provide similar support systems against stressors. Moreover, there are several associations of the various  
18 579 ethnic groups (Akan, Ga and Ewe) providing such support when the need arises. These systems provide  
19 580 both instrumental and/or emotional social support<sup>61</sup>. These assertions are supported by several studies.  
20 581 Specifically, these studies have shown that social support positively affect health outcomes through  
21 582 mechanisms such as increased patient compliance with therapies, decreased levels of depressive affect,  
22 583 direct physiologic effects on the immune system and improved perception of quality of life<sup>58 59</sup>. The lack  
23 584 of association observed in this study may also be attributed to other mechanisms, which influence the  
24 585 associations between PS and CKD. Another reason for the lack of association between PS and CKD in this  
25 586 study could be the cross-sectional analysis of our study. The association between PS and CKD has been  
26 587 shown to be cumulative and builds over substantial period of time<sup>62</sup>. To effectively evaluate this,  
27 588 longitudinal study design is required. This suggests the needs for more longitudinal studies in future  
28 589 research in assessing the associations between PS and CKD outcomes<sup>62 63</sup>.

39 590

40 591

## 41 592 **Strength and limitation**

42 593

43 594 Our study is the first to use all four robust constructs of PS to determine association between PS and CKD.  
44 595 This gave our study a more robust definition of PS compared to other similar studies. The use of all three  
45 596 definitions of CKD per KDIGO guidelines also provided a broader definition of CKD and allowed  
46 597 comparison between different geographical regions. The use of a homogenous population of Ghanaians and  
47 598 standardized protocols and diagnostic criteria in this study also provided a novel opportunity to compare  
48 599 Ghanaians living in rural and urban Ghana and their compatriots living in Europe. There are limitations to  
49 600 our study. The effect of PS on CKD has been reported to be cumulative and takes a long period of time,  
50 601 therefore the use of cross-sectional design prevented us from determining the longitudinal and cumulative

1  
2  
3 602 effect of repeated exposure to PS among the two populations. PS is captured and experienced in different  
4 603 magnitude across different populations. We were unable to ascertain if PS as defined in this study was  
5 604 adequately captured among Ghanaians living in rural and urban Ghana. Lastly, the four PS measures were  
6 605 assessed separately because of multicollinearity among the measures. There are several methods of  
7 606 addressing multicollinearity among measures such as partial least squares regression, principal component  
8 607 analysis, data reduction technique, which when used could have influenced the interpretation of the study  
9 608 results.

## 609 610 **Conclusion**

611  
612 We identified positive association between stress at work/home and albuminuria and CKD risk among  
613 Ghanaians living in Berlin. Conversely, our study shows no associations between stress as indicated by four  
614 PS indicators and prevalence of CKD. Consequently, there is the need to explore other factors that may be  
615 responsible for the observed differences in the prevalence of CKD among Ghanaians living in rural and  
616 urban Ghana and their peers living in Europe.

## 617 **Acknowledgement**

618 The authors are very grateful to the research assistants, interviewers and other staff of the five research  
619 locations who took part in gathering the data and the Ghanaian volunteers in all the participating RODAM  
620 sites. We gratefully acknowledge the advisory board members for their valuable support in shaping the  
621 RODAM study methods and the Academic Medical Centre Biobank for their support in biobank  
622 management and high-quality storage of collected samples.

## 623 624 **Contributors**

625 My co-authors have all contributed substantially to this manuscript and approve of this submission.  
626 Research idea and study design: DNA, CA, KS, DA, EB, KM, JA; data acquisition and curation:  
627 DNA, CA, EB, KM, data analysis/interpretation: DNA, CA, KS, DA, EB, KM, LS, JA, EOD,  
628 KKG, FPM, MBS, ID, JS, SB; statistical analysis: DNA, CA, KS. DNA, CA, KS, DA, EB, KM,  
629 LS, JA, EOD, KKG, FPM, MBS, ID, JS, SB; contributed important intellectual content during  
630 manuscript drafting or revision and accepts accountability for the overall work by ensuring that  
631 questions pertaining to the accuracy or integrity of any portion of the work are appropriately  
632 investigated and resolved. DNA and CA takes responsibility that this study has been reported  
633 honestly, accurately, and transparently; that no important aspects of the study have been omitted;  
634 and that any discrepancies from the study as planned have been explained.

## 635 636 **Funding**

1  
2  
3 637  
4 638 This work was supported by the European Commission under the Framework Programme (Grant Number:  
5  
6 639 278901). The funders had no role in study design, data collection and analysis, decision to publish, or  
7  
8 640 preparation of the manuscript. The Wellcome Trust supported Professor Smeeth's contribution, grant  
9  
10 641 number WT082178. Professor Joachim Spranger was supported by the DZHK (German Center for  
11  
12 642 cardiovascular research) and the Berlin Institute of Health (BIH).  
13  
14  
15

16 643 **Competing interest: None Declared**  
17 644

18 645 **Patient Consent:** None declared  
19 646

20 647 **Ethics approval:** IRBs at each participating site.  
21 648

22 649 **Data sharing statement:** Data are available from the RODAM research cohort, a third party. Dr.  
23 650 Eric Beune affiliated with the RODAM research cohort and a co-author of this paper in accordance  
24 651 with the RODAM requirements for collaboration. Dr. Beune is the Data Collection Coordinator of  
25 652 RODAM and may be contacted with further questions (e.j.beune@amc.uva.nl). Additionally,  
26 653 researchers interested in further collaboration with RODAM may see the following URL:  
27 654 <http://www.rod-am.eu/>  
28  
29  
30  
31  
32  
33  
34  
35  
36  
37  
38  
39  
40  
41  
42  
43  
44  
45  
46  
47  
48  
49  
50  
51  
52  
53  
54  
55  
56  
57  
58  
59  
60



1  
2  
3 672  
4 673  
5 674  
6 675  
7 676  
8 677  
9 678  
10 679  
11 680  
12 681  
13 682  
14 683  
15 684  
16 685  
17 686  
18 687  
19 688  
20 689  
21 690  
22 691  
23 692  
24 693  
25 694  
26 695  
27 696  
28 697  
29 698  
30 699  
31 700  
32 701  
33 702  
34 703  
35 704  
36 705  
37 706  
38 707  
39 708  
40 709  
41 710  
42 711  
43 712  
44 713  
45 714  
46  
47  
48  
49  
50  
51  
52  
53  
54  
55  
56  
57  
58  
59  
60

## References

1. Weisbord SD. Symptoms and their correlates in chronic kidney disease. *Adv Chronic Kidney Dis* 2007;14(4):319-27.
2. Correa-Rotter R, Naicker S, Katz IJ, et al. Demographic and epidemiologic transition in the developing world: role of albuminuria in the early diagnosis and prevention of renal and cardiovascular disease. *Kidney Int* 2004;66:S32-S37.
3. Lozano R, Naghavi M, Foreman K, et al. Global and regional mortality from 235 causes of death for 20 age groups in 1990 and 2010: a systematic analysis for the Global Burden of Disease Study 2010. *The lancet* 2012;380(9859):2095-128.
4. Katz IJ, Gerntholtz T, Naicker S. Africa and nephrology: the forgotten continent. *Nephron Clinical Practice* 2011;117(4):320-27.
5. Bruce MA, Beech BM, Sims M, et al. Social environmental stressors, psychological factors, and kidney disease. *J Investig Med* 2009;57(4):583-89.
6. Osafo C, Mate-Kole M, Affram K, et al. Prevalence of chronic kidney disease in hypertensive patients in Ghana. *Ren Fail* 2011;33(4):388-92.
7. Ojo A. Addressing the global burden of chronic kidney disease through clinical and translational research. *Trans Am Clin Climatol Assoc* 2014;125:229.
8. Norris K, Nissenson AR. Race, gender, and socioeconomic disparities in CKD in the United States. *J Am Soc Nephrol* 2008;19(7):1261-70.
9. Volkova N, McClellan W, Klein M, et al. Neighborhood poverty and racial differences in ESRD incidence. *J Am Soc Nephrol* 2008;19(2):356-64.
10. Shoham DA, Vupputuri S, Roux AVD, et al. Kidney disease in life-course socioeconomic context: the Atherosclerosis Risk in Communities (ARIC) Study. *Am J Kidney Dis* 2007;49(2):217-26.
11. Tarver-Carr ME, Powe NR, Eberhardt MS, et al. Excess risk of chronic kidney disease among African-American versus white subjects in the United States: a population-based study of potential explanatory factors. *J Am Soc Nephrol* 2002;13(9):2363-70.
12. Adjei DN, Stronks K, Adu D, et al. Chronic kidney disease burden among African migrants in three European countries and in urban and rural Ghana: the RODAM cross-sectional study. *Nephrology Dialysis Transplantation* 2018
13. Adjei DN, Stronks K, Adu D, et al. Relationship between educational and occupational levels, and Chronic Kidney Disease in a multi-ethnic sample-The HELIUS study. *PLoS One* 2017;12(11):e0186460.
14. Fremont A, Bird CE. Social and psychological factors, physiological processes, and physical health. 2000
15. Krantz DS, McCeney MK. Effects of psychological and social factors on organic disease: a critical assessment of research on coronary heart disease. *Annu Rev Psychol* 2002;53(1):341-69.

- 1  
2  
3 715 16. Cukor D, Fruchter Y, Ver Halen N, et al. A preliminary investigation of depression and kidney  
4 716 functioning in patients with chronic kidney disease. *Nephron Clinical practice* 2012;122(3-  
5 717 4):139-45.
- 7 718 17. Davidson K, Jonas BS, Dixon KE, et al. Do depression symptoms predict early hypertension  
8 719 incidence in young adults in the CARDIA study? *Arch Intern Med* 2000;160(10):1495-500.
- 9 720 18. Amerena J, Julius S. The role of the autonomic nervous system in hypertension. *Hypertens*  
10 721 *Res* 1995;18(2):99-110.
- 12 722 19. Calhoun DA, Mutinga ML. Race, family history of hypertension, and sympathetic response to  
13 723 cold pressor testing. *Blood Press* 1997;6(4):209-13.
- 14 724 20. Dibona GF. Neural control of the kidney: past, present, and future. *Hypertension*  
15 725 2003;41(3):621-24.
- 17 726 21. Auchincloss AH, Diez Roux AV, Brown DG, et al. Association of insulin resistance with distance  
18 727 to wealthy areas: the multi-ethnic study of atherosclerosis. *Am J Epidemiol*  
19 728 2006;165(4):389-97.
- 20 729 22. Bruce MA, Sims M, Miller S, et al. One size fits all? Race, gender and body mass index among  
21 730 US adults. *J Natl Med Assoc* 2007;99(10):1152.
- 23 731 23. McEwen BS. Protective and damaging effects of stress mediators. *N Engl J Med*  
24 732 1998;338(3):171-79.
- 25 733 24. Cohen S, Herbert TB. Health psychology: Psychological factors and physical disease from the  
26 734 perspective of human psychoneuroimmunology. *Annu Rev Psychol* 1996;47(1):113-42.
- 28 735 25. Barker D. Fetal origins of coronary heart disease. *Br Heart J* 1993;69(3):195.
- 29 736 26. Phillips DI, Jones A, Goulden PA. Birth weight, stress, and the metabolic syndrome in adult  
30 737 life. *Ann N Y Acad Sci* 2006;1083(1):28-36.
- 31 738 27. Kim JW, Moon SJ, Kim HJ, et al. Relationship between Chronic Kidney Disease and Depression  
32 739 in Elderly Koreans Using the 2013 Korea National Health and Nutrition Examination  
33 740 Survey Data. *Korean journal of family medicine* 2017;38(3):156-62.
- 35 741 28. Loosman WL, Rottier MA, Honig A, et al. Association of depressive and anxiety symptoms  
36 742 with adverse events in Dutch chronic kidney disease patients: a prospective cohort study.  
37 743 *BMC Nephrol* 2015;16(1):155.
- 39 744 29. Novak M, Mucsi I, Mendelssohn D. Screening for depression: only one piece of the puzzle.  
40 745 *Nephrology Dialysis Transplantation* 2013;28(6):1336-40.
- 41 746 30. McKercher CM, Venn AJ, Blizzard L, et al. Psychosocial factors in adults with chronic kidney  
42 747 disease: characteristics of pilot participants in the Tasmanian Chronic Kidney Disease  
43 748 study. *BMC Nephrol* 2013;14(1):83.
- 45 749 31. Lunyera J, Davenport CA, Bhavsar NA, et al. Nondepressive Psychosocial Factors and CKD  
46 750 Outcomes in Black Americans. *Clin J Am Soc Nephrol* 2018:CJN. 06430617.
- 47 751 32. Annor FB, Masyn KE, Okosun IS, et al. Psychosocial stress and changes in estimated glomerular  
48 752 filtration rate among adults with diabetes mellitus. *Kidney research and clinical practice*  
49 753 2015;34(3):146-53.
- 51 754 33. Gholson GK, Mwendwa DT, Wright RS, et al. The Combined Influence of Psychological Factors  
52 755 on Biomarkers of Renal Functioning in African Americans. *Ethn Dis* 2015;25(2):117.
- 53 756 34. Kaur M, Kaur A, Saggu A, et al. Comparative study on psychosocial stresses among urban and  
54 757 rural geriatric population in selected areas of district Ludhiana (Punjab), 2006. *Nursing*  
55 758 *and Midwifery Research* 2007;3(2)

- 1  
2  
3 759 35. Agyemang C, Beune E, Meeks K, et al. Rationale and cross-sectional study design of the  
4 760 Research on Obesity and type 2 Diabetes among African Migrants: the RODAM study. *BMJ*  
5 761 *open* 2015;4(3):e004877.  
6  
7 762 36. Agyemang C, Snijder MB, Adjei DN, et al. Ethnic Disparities in CKD in the Netherlands: The  
8 763 Healthy Life in an Urban Setting (HELIUS) Study. *Am J Kidney Dis* 2016;67(3):391-99.  
9 764 37. Peek ME, Nunez-Smith M, Drum M, et al. Adapting the everyday discrimination scale to  
10 765 medical settings: reliability and validity testing in a sample of African American patients.  
11 766 *Ethn Dis* 2011;21(4):502.  
12  
13 767 38. Pérez DJ, Fortuna L, Alegria M. Prevalence and correlates of everyday discrimination among  
14 768 US Latinos. *J Community Psychol* 2008;36(4):421-33.  
15 769 39. Ikram UZ, Snijder MB, Fassaert TJ, et al. The contribution of perceived ethnic discrimination  
16 770 to the prevalence of depression. *The European Journal of Public Health* 2014;25(2):243-  
17 771 48.  
18  
19 772 40. Rosengren A, Hawken S, Ôunpuu S, et al. Association of psychosocial risk factors with risk of  
20 773 acute myocardial infarction in 11 119 cases and 13 648 controls from 52 countries (the  
21 774 INTERHEART study): case-control study. *The Lancet* 2004;364(9438):953-62.  
22  
23 775 41. Rosmalen J, Bos E, De Jonge P. Validation of the Long-term Difficulties Inventory (LDI) and the  
24 776 List of Threatening Experiences (LTE) as measures of stress in epidemiological population-  
25 777 based cohort studies. *Psychol Med* 2012;42(12):2599-608.  
26 778 42. Brugha T, Bebbington P, Tennant C, et al. The List of Threatening Experiences: a subset of 12  
27 779 life event categories with considerable long-term contextual threat. *Psychol Med*  
28 780 1985;15(1):189-94.  
29  
30 781 43. Kroenke K, Spitzer RL, Williams JB. The phq-9. *J Gen Intern Med* 2001;16(9):606-13.  
31 782 44. Association AD. Standards of Medical Care in Diabetes—2014. *Diabetes Care* 2014; 37 (Suppl.  
32 783 1): S14–S80 Diagnosis and Classification of Diabetes Mellitus. *Diabetes Care* 2014; 37  
33 784 (Suppl. 1): S81–S90. *Diabetes Care* 2014;37(3):887-87.  
34  
35 785 45. Stevens LA, Schmid CH, Greene T, et al. Comparative performance of the CKD Epidemiology  
36 786 Collaboration (CKD-EPI) and the Modification of Diet in Renal Disease (MDRD) Study  
37 787 equations for estimating GFR levels above 60 mL/min/1.73 m<sup>2</sup>. *Am J Kidney Dis*  
38 788 2010;56(3):486-95.  
39  
40 789 46. Kellum JA, Lameire N, Aspelin P, et al. Kidney disease: improving global outcomes (KDIGO)  
41 790 acute kidney injury work group. KDIGO clinical practice guideline for acute kidney injury.  
42 791 *Kidney international supplements* 2012;2(1):1-138.  
43  
44 792 47. KDIGO G. Work Group. KDIGO clinical practice guideline for glomerulonephritis. *Kidney inter,*  
45 793 *Suppl* 2012;2:139-274.  
46 794 48. Rivera B, Casal B, Currais L. Length of stay and mental health of the immigrant population in  
47 795 Spain: Evidence of the healthy immigrant effect. *Applied Economics* 2015;47(19):1972-82.  
48 796 49. Collins AJ, Foley RN, Herzog C, et al. US Renal Data System 2010 Annual Data Report. *American*  
49 797 *journal of kidney diseases: the official journal of the National Kidney Foundation*  
50 798 2011;57(1 Suppl 1):A8, e1.  
51  
52 799 50. Fox CS, Larson MG, Leip EP, et al. Predictors of new-onset kidney disease in a community-  
53 800 based population. *JAMA* 2004;291(7):844-50.  
54 801 51. Banks J, Marmot M, Oldfield Z, et al. Disease and disadvantage in the United States and in  
55 802 England. *JAMA* 2006;295(17):2037-45.  
56  
57  
58  
59  
60

- 1  
2  
3 803 52. Levin A, Stevens L, McCullough PA. Cardiovascular disease and the kidney: Tracking a killer in  
4 804 chronic kidney disease. *Postgrad Med* 2002;111(4):53-60.
- 5 805 53. Tsai Y-C, Chiu Y-W, Hung C-C, et al. Association of symptoms of depression with progression  
6 806 of CKD. *Am J Kidney Dis* 2012;60(1):54-61.
- 7 807 54. Bruce MA, Griffith DM, Thorpe RJ. Stress and the kidney. *Adv Chronic Kidney Dis*  
8 808 2015;22(1):46-53.
- 9 809 55. Brummett BH, Barefoot JC, Siegler IC, et al. Characteristics of socially isolated patients with  
10 810 coronary artery disease who are at elevated risk for mortality. *Psychosom Med*  
11 811 2001;63(2):267-72.
- 12 812 56. Eng PM, Rimm EB, Fitzmaurice G, et al. Social ties and change in social ties in relation to  
13 813 subsequent total and cause-specific mortality and coronary heart disease incidence in  
14 814 men. *Am J Epidemiol* 2002;155(8):700-09.
- 15 815 57. Psychosocial factors in patients with chronic kidney disease: The impact of social support on  
16 816 end-stage renal disease. *Seminars in dialysis*; 2005. Wiley Online Library.
- 17 817 58. Cohen SD, Sharma T, Acquaviva K, et al. Social support and chronic kidney disease: an update.  
18 818 *Adv Chronic Kidney Dis* 2007;14(4):335-44.
- 19 819 59. Uchino BN, Cacioppo JT, Kiecolt-Glaser JK. The relationship between social support and  
20 820 physiological processes: a review with emphasis on underlying mechanisms and  
21 821 implications for health. *Psychol Bull* 1996;119(3):488.
- 22 822 60. Tsurugano S, Nakao M, Takeuchi T, et al. Job stress strengthens the link between metabolic  
23 823 risk factors and renal dysfunction in adult men. *The Tohoku journal of experimental*  
24 824 *medicine* 2012;226(2):101-08.
- 25 825 61. Tróccol BT. Desenvolvimento de escala para avaliação do suporte social em HIV/aids.  
26 826 *Psicologia: Teoria e Pesquisa* 2006;22(3):317-26.
- 27 827 62. Schneiderman N, Ironson G, Siegel SD. Stress and health: psychological, behavioral, and  
28 828 biological determinants. *Annu Rev Clin Psychol* 2005;1:607-28.
- 29 829 63. McKercher C, Sanderson K, Jose MD. Psychosocial factors in people with chronic kidney  
30 830 disease prior to renal replacement therapy. *Nephrology* 2013;18(9):585-91.
- 31  
32  
33  
34  
35  
36 830  
37 831  
38 832  
39 833  
40 834  
41 835  
42 836  
43 837  
44 838  
45 839  
46 840  
47 841  
48 842  
49 843  
50 844  
51 845  
52 846  
53 847  
54  
55  
56  
57  
58  
59  
60

1  
2  
3 **848 Legend for figures**

4 849

5 **850 Figure 1:** Prevalence of CKD risk among Ghanaians who have experienced negative life events and those who have  
6 **851** not experienced any negative life events stratified by site. Definition per 2012 KDIGO (Kidney Disease: Improving  
7 **852** Global Outcomes) guidelines.  
8 **853**

9 **854 Figure 2:** Prevalence of CKD risk among Ghanaians who have experienced discrimination and those who have not  
10 **855** experienced any discrimination stratified by site. Definitions per 2012 KDIGO (Kidney Disease: Improving Global  
11 **856** Outcomes) guidelines.  
12 **857**

13 **858 Figure 3:** Prevalence of CKD risk among Ghanaians who have experienced stress at home/work and those who have  
14 **859** not experienced any stress at home/work in the past 12 months stratified by site. Definitions per 2012 KDIGO  
15 **860** (Kidney Disease: Improving Global Outcomes) guidelines.  
16 **861**

17 **862 Figure 4:** Prevalence of CKD risk among Ghanaians who have depressive symptoms and those who do not have  
18 **863** depressive symptoms stratified by site. Definitions per 2012 KDIGO (Kidney Disease: Improving Global Outcomes)  
19 **864** guidelines.  
20 **865**

21 866

22 867

23 868

24 869

25 870

26 871

27 872

28 873

29 874

30 875

31 876

32 877

33 878

34 879

35 880

36 881

37 882

38 883

39 884

40 885

41 886

42 887

43 888

44 889

45 890

46 891

47 892

48 893

49 894

50 895

51 896

52

53

54

55

56

57

58

59

1  
2  
3 897 **Legend for Supplementary Tables**  
4 898

5 899 **S1: Association of psychosocial stressors (PS) indicators (negative life events, discrimination, stress at**  
6 900 **work/home and depression) with albuminuria, reduced eGFR and CKD risk for Ghanaians living in Ghana**  
7 901 **and those living in Europe.**  
8 902

9 903 **S2: Association of psychosocial stressors (PS) indicators (negative life events, discrimination, stress at**  
10 904 **work/home and depression) with albuminuria, reduced eGFR and CKD risk for Ghanaians living in Ghana**  
11 905 **and those living in Europe stratified by obesity status.**  
12 906

13 907 **S3: Association of psychosocial stressors (PS) indicators (negative life events, discrimination, stress at**  
14 908 **work/home and depression) with albuminuria, reduced eGFR and CKD risk for Ghanaians living in Ghana**  
15 909 **and those living in Europe stratified by diabetes status.**  
16 910

17 911 **S4: Association of psychosocial stressors (PS) indicators (negative life events, discrimination, stress at**  
18 912 **work/home and depression) with albuminuria, reduced eGFR and CKD risk for Ghanaians living in Ghana**  
19 913 **and those living in Europe stratified by hypertensive status.**  
20 914  
21  
22  
23  
24  
25  
26  
27  
28  
29  
30  
31  
32  
33  
34  
35  
36  
37  
38  
39  
40  
41  
42  
43  
44  
45  
46  
47  
48  
49  
50  
51  
52  
53  
54  
55  
56  
57  
58  
59  
60

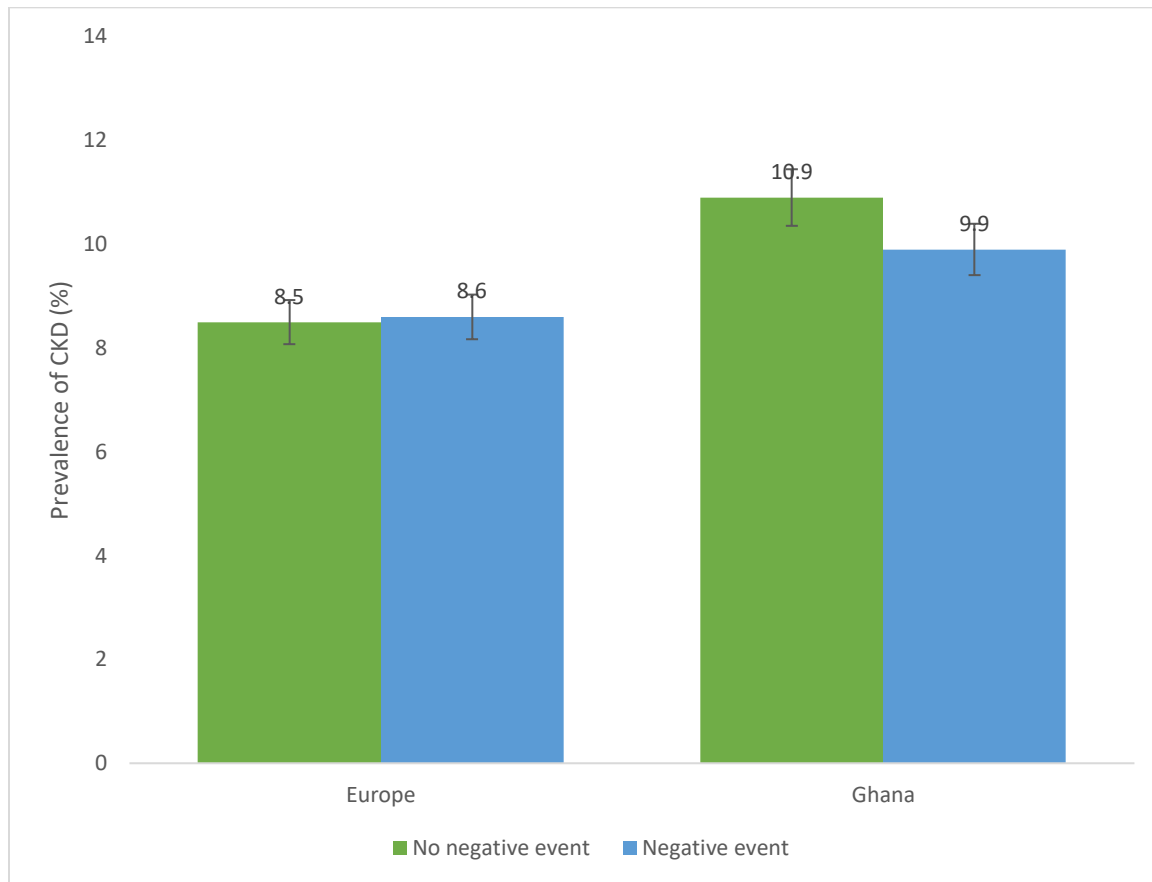

**Figure 1:** Prevalence of CKD risk among Ghanaians who have experienced negative life events and those who have not experienced any negative life events stratified by site. Definition per 2012 KDIGO (Kidney Disease: Improving Global Outcomes) guidelines.



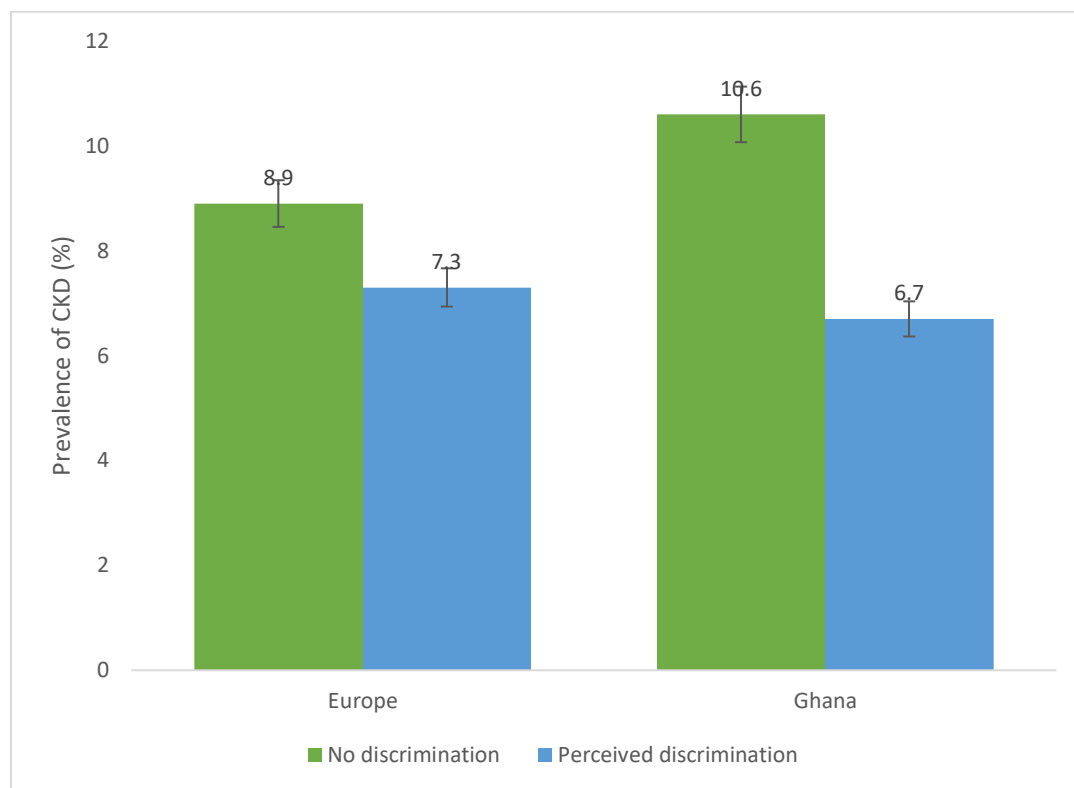

**Figure 2:** Prevalence of CKD risk among Ghanaians who have experienced discrimination and those who have not experienced any discrimination stratified by site. Definitions per 2012 KDIGO (Kidney Disease: Improving Global Outcomes) guidelines.



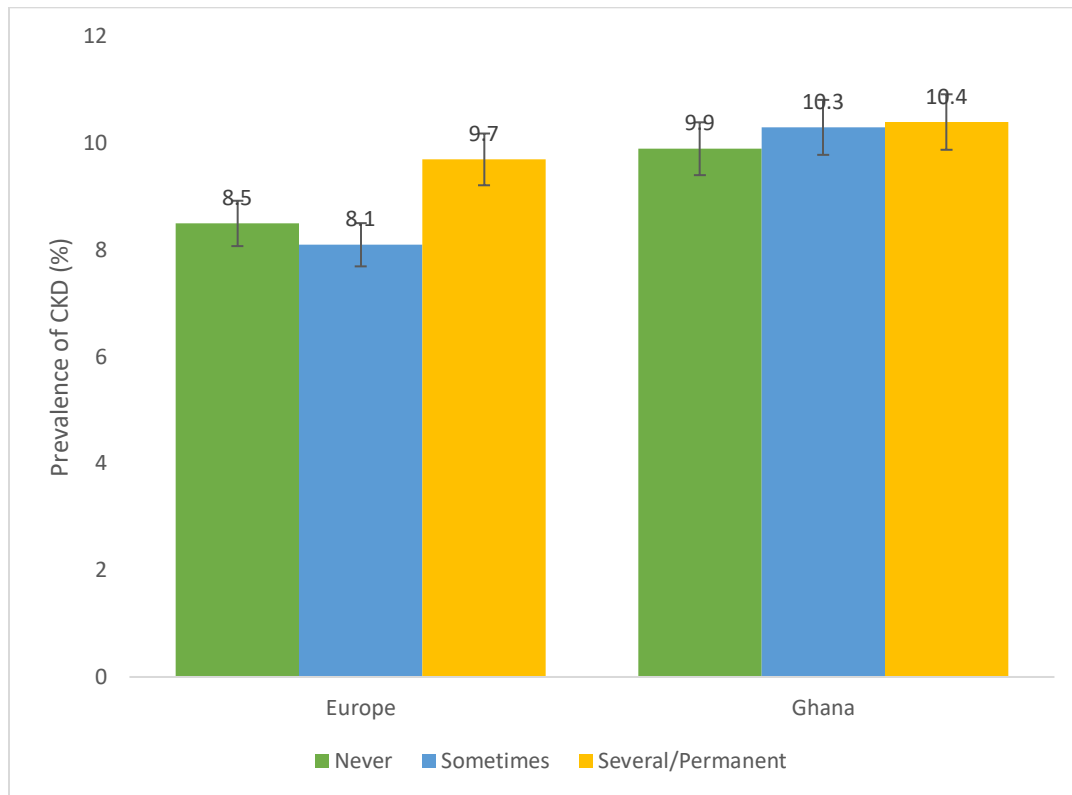

**Figure 3:** Prevalence of CKD risk among Ghanaians who have experienced stress at home/work and those who have not experienced any stress at home/work in the past 12 months stratified by site. Definitions per 2012 KDIGO (Kidney Disease: Improving Global Outcomes) guidelines.

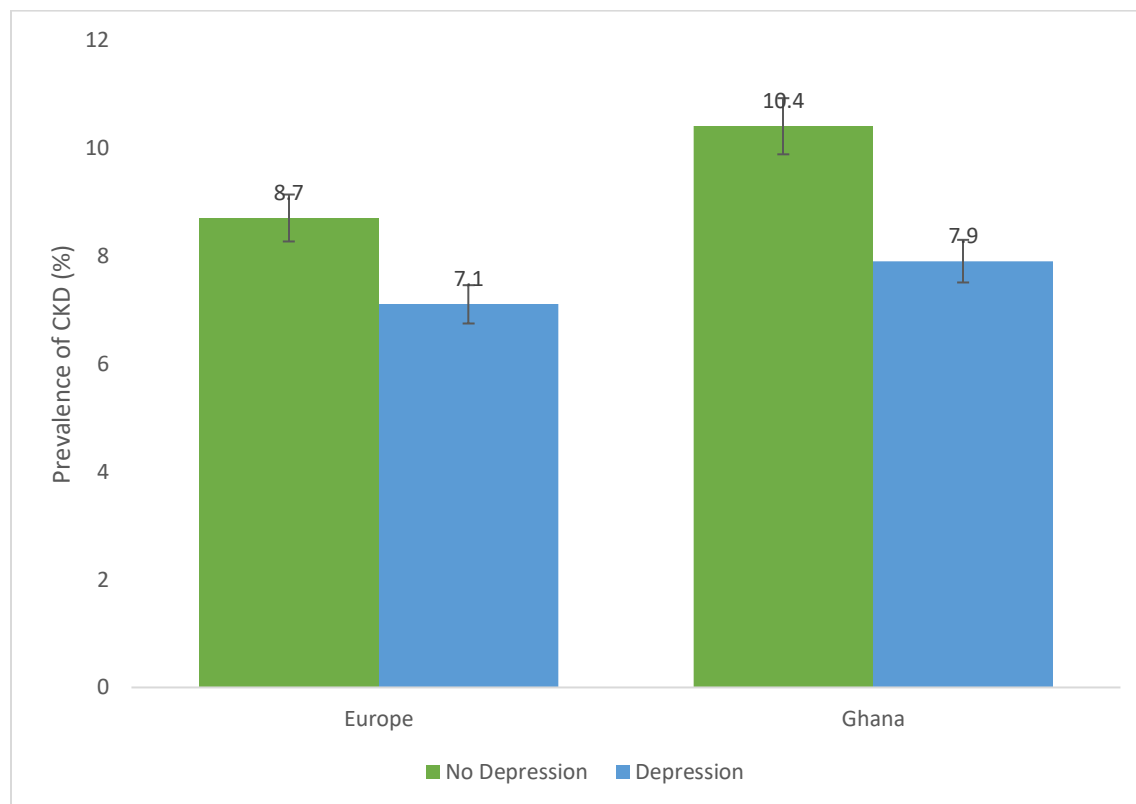

**Figure 4:** Prevalence of CKD risk among Ghanaians who have depressive symptoms and those who do not have depressive symptoms stratified by site. Definitions per 2012 KDIGO (Kidney Disease: Improving Global Outcomes) guidelines.

Supplementary Tables

S1: Association of psychosocial stressors (PS) indicators (negative life events, discrimination, stress at work/home and depression) with albuminuria, reduced eGFR and CKD risk for Ghanaians living in Ghana and those living in Europe

|                            | Albuminuria (ACR ≥ 3 mg/mmol) |                  | eGFR < 60 mL/min/1.73 m2 |                  | High to very high CKD risk (KDIGO, 2012) |                  |
|----------------------------|-------------------------------|------------------|--------------------------|------------------|------------------------------------------|------------------|
|                            | OR (95% CI)                   |                  | OR (95% CI)              |                  | OR (95% CI)                              |                  |
|                            | n (%)                         | Model 3          | n (%)                    | Model 3          | n cases (%)                              | Model 3          |
| <b>Negative events</b>     |                               |                  |                          |                  |                                          |                  |
| <b>Europe</b>              |                               |                  |                          |                  |                                          |                  |
| No                         | 1128 (8.2)                    | 1.00 (Reference) | 1106 (2.6)               | 1.00 (Reference) | 1090 (8.5)                               | 1.00 (Reference) |
| Yes                        | 1615 (8.4)                    | 0.95 (0.70-1.30) | 1587 (2.5)               | 0.77 (0.44-1.37) | 1557 (8.6)                               | 0.92 (0.67-1.26) |
| <b>Ghana</b>               |                               |                  |                          |                  |                                          |                  |
| No                         | 732 (10.4)                    | 1.00 (Reference) | 736 (4.5)                | 1.00 (Reference) | 732 (10.9)                               | 1.00 (Reference) |
| Yes                        | 1595 (9.2)                    | 0.79 (0.58-1.07) | 1601 (3.4)               | 0.69 (0.43-1.09) | 1590 (9.9)                               | 0.79 (0.58-1.06) |
| <b>Discrimination</b>      |                               |                  |                          |                  |                                          |                  |
| <b>Europe</b>              |                               |                  |                          |                  |                                          |                  |
| No                         | 1899 (8.5)                    | 1.00 (Reference) | 1867 (2.6)               | 1.00 (Reference) | 1832 (8.9)                               | 1.00 (Reference) |
| Yes                        | 810 (7.4)                     | 0.87 (0.61-1.21) | 791 (2.2)                | 0.87 (0.45-1.65) | 782 (7.3)                                | 0.79 (0.55-1.12) |
| <b>Ghana</b>               |                               |                  |                          |                  |                                          |                  |
| No                         | 2034 (10.0)                   | 1.00 (Reference) | 2047 (3.9)               | 1.00 (Reference) | 2031 (10.6)                              | 1.00 (Reference) |
| Yes                        | 104 (7.7)                     | 0.92 (0.43-1.98) | 104 (1.9)                | 0.65 (0.15-2.79) | 104 (6.7)                                | 0.74 (0.33-1.66) |
| <b>Stress at home/work</b> |                               |                  |                          |                  |                                          |                  |
| <b>Europe</b>              |                               |                  |                          |                  |                                          |                  |
| Never                      | 1330 (8.2)                    | 1.00 (Reference) | 1305 (3.4)               | 1.00 (Reference) | 1282 (8.5)                               | 1.00 (Reference) |
| Some stress                | 1002 (7.9)                    | 1.01 (0.72-1.41) | 984 (1.4)                | 0.51 (0.25-1.04) | 968 (8.1)                                | 1.01 (0.72-1.42) |
| Several/Permanent stresses | 397 (9.1)                     | 1.00 (0.64-1.59) | 390 (2.3)                | 0.91 (0.40-2.03) | 383 (9.7)                                | 1.15 (0.74-1.79) |
| <b>Ghana</b>               |                               |                  |                          |                  |                                          |                  |

|                            |            |                  |            |                  |             |                  |
|----------------------------|------------|------------------|------------|------------------|-------------|------------------|
| Never                      | 682 (10.3) | 1.00 (Reference) | 688 (3.3)  | 1.00 (Reference) | 682 (9.9)   | 1.00 (Reference) |
| Some stress                | 1279 (9.5) | 0.78 (0.56-1.09) | 1279 (3.9) | 1.14 (0.67-1.93) | 1274 (10.3) | 0.93 (0.67-1.29) |
| Several/Permanent stresses | 365 (8.5)  | 0.70 (0.43-1.13) | 369 (4.1)  | 1.32 (0.65-1.68) | 365 (10.4)  | 0.97 (0.62-1.52) |
| <b>Depressive symptoms</b> |            |                  |            |                  |             |                  |
| <b>Europe</b>              |            |                  |            |                  |             |                  |
| No                         | 2505 (8.5) | 1.00 (Reference) | 2457 (2.7) | 1.00 (Reference) | 2416 (8.7)  | 1.00 (Reference) |
| Yes                        | 206 (6.3)  | 0.65 (0.33-1.28) | 202 (1.5)  | 0.94 (0.28-3.14) | 199 (7.1)   | 0.78 (0.41-1.47) |
| <b>Ghana</b>               |            |                  |            |                  |             |                  |
| No                         | 2212 (9.9) | 1.00 (Reference) | 2222 (3.8) | 1.00 (Reference) | 2207 (10.4) | 1.00 (Reference) |
| Yes                        | 114 (5.3)  | 0.41 (0.16-1.04) | 114 (2.6)  | 0.58 (0.17-1.95) | 114 (7.9)   | 0.62 (0.28-1.31) |

Model 3, adjusted for age, sex educational level, hypertension, diabetes, hypercholesterolemia, BMI, physical activity and smoking; Abbreviations: CI, confidence interval; ACR, albumin creatinine ratio; eGFR, estimated glomerular filtration rate; CKD, chronic kidney disease; OR, odds ratio, n= total number of Ghanaians living in Ghana and Europe among the various levels of PS constructs; %, proportion of individuals with CKD among the various levels of PS constructs in Ghana and Europe.

1  
2  
3  
4  
5  
6  
7  
8  
9  
10  
11  
12  
13  
14  
15  
16  
17  
18  
19  
20  
21  
22  
23  
24  
25  
26  
27  
28  
29  
30  
31  
32  
33  
34  
35  
36  
37  
38  
39  
40  
41  
42  
43  
44  
45  
46  
47

**S2: Association of psychosocial stressors (PS) indicators (negative life events, discrimination, stress at work/home and depression) with albuminuria, reduced eGFR and CKD risk for Ghanaians living in Ghana and those living in Europe stratified by obesity status**

|                         | Albuminuria (ACR ≥ 3 mg/mmol) |                  |                  | eGFR < 60 mL/min/1.73 m2 |                  |                  | High to very high CKD risk (KDIGO, 2012) |                         |                         |
|-------------------------|-------------------------------|------------------|------------------|--------------------------|------------------|------------------|------------------------------------------|-------------------------|-------------------------|
|                         | n (%)                         | OR (95% CI)      |                  | n (%)                    | OR (95% CI)      |                  | n cases (%)                              | OR (95% CI)             |                         |
|                         |                               | Model 1          | Model 2          |                          | Model 1          | Model 2          |                                          | Model 1                 | Model 2                 |
| <b>Negative events</b>  |                               |                  |                  |                          |                  |                  |                                          |                         |                         |
| <b>Europe/Not obese</b> |                               |                  |                  |                          |                  |                  |                                          |                         |                         |
| No                      | 736 (7.4)                     | 1.00 (Reference) | 1.00 (Reference) | 729 (2.5)                | 1.00 (Reference) | 1.00 (Reference) | 719 (8.5)                                | 1.00 (Reference)        | 1.00 (Reference)        |
| Yes                     | 1003 (7.7)                    | 0.98 (0.67-1.40) | 0.99 (0.69-1.43) | 992 (2.0)                | 0.77 (0.40-1.48) | 0.71 (0.36-1.42) | 971 (7.9)                                | 0.91 (0.64-1.29)        | 0.89 (0.62-1.29)        |
| <b>Europe/Obese</b>     |                               |                  |                  |                          |                  |                  |                                          |                         |                         |
| No                      | 390 (9.2)                     | 1.00 (Reference) | 1.00 (Reference) | 375 (2.9)                | 1.00 (Reference) | 1.00 (Reference) | 369 (8.7)                                | 1.00 (Reference)        | 1.00 (Reference)        |
| Yes                     | 607 (9.6)                     | 1.05 (0.67-1.63) | 1.14 (0.72-1.82) | 590 (3.2)                | 0.97 (0.44-2.11) | 1.01 (0.44-2.26) | 581 (9.6)                                | 1.15 (0.73-1.82)        | 1.15 (0.71-1.85)        |
| <b>Ghana/Not obese</b>  |                               |                  |                  |                          |                  |                  |                                          |                         |                         |
| No                      | 588 (9.5)                     | 1.00 (Reference) | 1.00 (Reference) | 592 (4.7)                | 1.00 (Reference) | 1.00 (Reference) | 588 (10.0)                               | 1.00 (Reference)        | 1.00 (Reference)        |
| Yes                     | 1324 (8.5)                    | 0.86 (0.61-1.21) | 0.83 (0.59-1.17) | 1331 (3.4)               | 0.64 (0.39-1.05) | 0.65 (0.39-1.83) | 1321 (9.0)                               | 0.86 (0.61-1.20)        | 0.84 (0.60-1.18)        |
| <b>Ghana/Obese</b>      |                               |                  |                  |                          |                  |                  |                                          |                         |                         |
| No                      | 144 (13.9)                    | 1.00 (Reference) | 1.00 (Reference) | 144 (3.5)                | 1.00 (Reference) | 1.00 (Reference) | 144 (14.6)                               | 1.00 (Reference)        | 1.00 (Reference)        |
| Yes                     | 268 (13.1)                    | 0.91 (0.50-1.64) | 0.91 (0.49-1.65) | 267 (3.8)                | 1.04 (0.34-3.16) | 1.09 (0.35-3.37) | 266 (14.3)                               | 0.94 (0.52-1.68)        | 0.94 (0.52-1.67)        |
| <b>Discrimination</b>   |                               |                  |                  |                          |                  |                  |                                          |                         |                         |
| <b>Europe/Not obese</b> |                               |                  |                  |                          |                  |                  |                                          |                         |                         |
| No                      | 1186 (8.4)                    | 1.00 (Reference) | 1.00 (Reference) | 1172 (2.4)               | 1.00 (Reference) | 1.00 (Reference) | 1150 (9.4)                               | 1.00 (Reference)        | 1.00 (Reference)        |
| Yes                     | 538 (5.9)                     | 0.69 (0.46-1.05) | 0.71 (0.46-1.11) | 532 (1.5)                | 0.62 (0.28-1.37) | 0.57 (0.24-1.34) | 525 (5.9)                                | <b>0.63 (0.42-0.96)</b> | <b>0.63 (0.41-0.97)</b> |
| <b>Europe/Obese</b>     |                               |                  |                  |                          |                  |                  |                                          |                         |                         |
| No                      | 709 (8.7)                     | 1.00 (Reference) | 1.00 (Reference) | 691 (3.0)                | 1.00 (Reference) | 1.00 (Reference) | 678 (8.9)                                | 1.00 (Reference)        | 1.00 (Reference)        |
| Yes                     | 269 (10.0)                    | 1.14 (0.71-1.85) | 1.29 (0.78-2.12) | 256 (3.5)                | 1.15 (0.50-2.63) | 1.27 (0.54-2.99) | 254 (9.8)                                | 1.13 (0.69-1.86)        | 1.22 (0.73-2.13)        |
| <b>Ghana/Not obese</b>  |                               |                  |                  |                          |                  |                  |                                          |                         |                         |
| No                      | 1648 (9.1)                    | 1.00 (Reference) | 1.00 (Reference) | 1661 (3.9)               | 1.00 (Reference) | 1.00 (Reference) | 1646 (9.6)                               | 1.00 (Reference)        | 1.00 (Reference)        |
| Yes                     | 81 (8.6)                      | 1.06 (0.48-2.38) | 1.04 (0.47-2.32) | 81 (2.5)                 | 1.04 (0.48-2.32) | 0.86 (0.20-3.69) | 81 (7.4)                                 | 0.90 (0.38-2.12)        | 0.89 (0.38-2.11)        |
| <b>Ghana/Obese</b>      |                               |                  |                  |                          |                  |                  |                                          |                         |                         |

|    |                            |            |                  |                  |            |                  |                  |            |                  |                  |
|----|----------------------------|------------|------------------|------------------|------------|------------------|------------------|------------|------------------|------------------|
| 1  |                            |            |                  |                  |            |                  |                  |            |                  |                  |
| 2  |                            |            |                  |                  |            |                  |                  |            |                  |                  |
| 3  | No                         | 383 (13.8) | 1.00 (Reference) | 1.00 (Reference) | 383 (3.7)  | 1.00 (Reference) | 1.00 (Reference) | 382 (14.9) | 1.00 (Reference) | 1.00 (Reference) |
| 4  | Yes                        | 23 (4.4)   | 0.31 (0.04-2.36) | 0.40 (0.05-3.11) | 23 (0.0)   | **** (***_***)   | **** (***_***)   | 23 (4.4)   | 0.29 (0.04-2.22) | 0.34 (0.04-2.66) |
| 5  |                            |            |                  |                  |            |                  |                  |            |                  |                  |
| 6  | <b>Stress at</b>           |            |                  |                  |            |                  |                  |            |                  |                  |
| 7  | <b>home/work</b>           |            |                  |                  |            |                  |                  |            |                  |                  |
| 8  | <b>Europe/Not obese</b>    |            |                  |                  |            |                  |                  |            |                  |                  |
| 9  | Never                      | 855 (7.4)  | 1.00 (Reference) | 1.00 (Reference) | 847 (3.4)  | 1.00 (Reference) | 1.00 (Reference) | 831 (8.2)  | 1.00 (Reference) | 1.00 (Reference) |
| 10 | Some stress                | 629 (8.3)  | 1.16 (0.79-1.70) | 1.20 (0.81-1.79) | 627 (1.4)  | 0.52 (0.24-1.12) | 0.47 (0.21-1.07) | 615 (7.9)  | 0.98 (0.66-1.43) | 0.98 (0.65-1.46) |
| 11 | Several/Permanent stresses | 247 (6.9)  | 0.93 (0.53-1.62) | 1.15 (0.77-1.72) | 239 (2.3)  | 0.45 (0.13-1.52) | 0.49 (0.15-1.67) | 236 (9.1)  | 0.97 (0.57-1.65) | 1.04 (0.61-1.78) |
| 12 |                            |            |                  |                  |            |                  |                  |            |                  |                  |
| 13 | <b>Europe/Obese</b>        |            |                  |                  |            |                  |                  |            |                  |                  |
| 14 | Never                      | 472 (9.8)  | 1.00 (Reference) | 1.00 (Reference) | 455 (3.9)  | 1.00 (Reference) | 1.00 (Reference) | 448 (10.3) | 1.00 (Reference) | 1.00 (Reference) |
| 15 | Some stress                | 372 (7.5)  | 0.72 (0.44-1.18) | 0.79 (0.47-1.32) | 356 (1.4)  | 0.41 (0.15-1.16) | 0.43 (0.15-1.21) | 352 (9.5)  | 0.94 (0.57-1.53) | 1.05 (0.62-1.76) |
| 16 | Several/Permanent stresses | 147 (12.2) | 1.32 (0.74-2.38) | 1.31 (0.72-2.42) | 148 (4.1)  | 1.05 (0.40-2.79) | 1.09 (0.40-2.91) | 144 (8.5)  | 1.36 (0.74-2.49) | 1.41 (0.75-2.64) |
| 17 |                            |            |                  |                  |            |                  |                  |            |                  |                  |
| 18 | <b>Ghana/Not obese</b>     |            |                  |                  |            |                  |                  |            |                  |                  |
| 19 | Never                      | 537 (9.7)  | 1.00 (Reference) | 1.00 (Reference) | 542 (3.1)  | 1.00 (Reference) | 1.00 (Reference) | 537 (8.9)  | 1.00 (Reference) | 1.00 (Reference) |
| 20 | Some stress                | 1055 (8.3) | 0.79 (0.56-1.15) | 0.74 (0.52-1.07) | 1057 (3.9) | 1.16 (0.65-2.09) | 1.21 (0.67-2.18) | 1052 (9.0) | 0.92 (0.64-1.35) | 0.90 (0.62-1.32) |
| 21 | Several/permanent stresses | 319 (8.5)  | 0.81 (0.49-1.32) | 0.73 (0.44-1.20) | 323 (4.3)  | 1.34 (0.64-2.83) | 1.43 (0.67-3.04) | 319 (10.7) | 1.12 (0.69-1.79) | 1.09 (0.68-1.76) |
| 22 |                            |            |                  |                  |            |                  |                  |            |                  |                  |
| 23 | <b>Ghana/Obese</b>         |            |                  |                  |            |                  |                  |            |                  |                  |
| 24 | Never                      | 145 (12.4) | 1.00 (Reference) | 1.00 (Reference) | 146 (4.1)  | 1.00 (Reference) | 1.00 (Reference) | 145 (13.8) | 1.00 (Reference) | 1.00 (Reference) |
| 25 | Some stress                | 221 (14.9) | 1.21 (0.64-2.26) | 1.05 (0.55-1.99) | 219 (3.7)  | 0.74 (0.25-2.22) | 0.83 (0.26-2.06) | 219 (15.9) | 1.13 (0.62-2.07) | 1.02 (0.55-1.89) |
| 26 | Several/Permanent stresses | 46 (8.7)   | 0.64 (0.20-2.01) | 0.52 (0.16-1.65) | 46 (2.2)   | 0.41 (0.05-3.61) | 0.45 (0.05-4.01) | 46 (8.8)   | 0.55 (0.17-1.71) | 0.47 (0.14-1.50) |
| 27 |                            |            |                  |                  |            |                  |                  |            |                  |                  |
| 28 | <b>Depressive symptoms</b> |            |                  |                  |            |                  |                  |            |                  |                  |
| 29 | <b>Europe/Not obese</b>    |            |                  |                  |            |                  |                  |            |                  |                  |
| 30 | No                         | 1601 (7.9) | 1.00 (Reference) | 1.00 (Reference) | 1586 (2.2) | 1.00 (Reference) | 1.00 (Reference) | 1558 (8.3) | 1.00 (Reference) | 1.00 (Reference) |
| 31 | Yes                        | 121 (4.9)  | 0.59 (0.25-1.36) | 0.65 (0.27-1.48) | 117 (1.7)  | 0.79 (0.18-2.35) | 0.86 (0.21-3.80) | 115 (5.22) | 0.58 (0.25-1.35) | 0.64 (0.27-1.49) |
| 32 |                            |            |                  |                  |            |                  |                  |            |                  |                  |
| 33 | <b>Europe/Obese</b>        |            |                  |                  |            |                  |                  |            |                  |                  |
| 34 | No                         | 899 (9.7)  | 1.00 (Reference) | 1.00 (Reference) | 866 (3.4)  | 1.00 (Reference) | 1.00 (Reference) | 853 (9.4)  | 1.00 (Reference) | 1.00 (Reference) |
| 35 | Yes                        | 83 (7.2)   | 0.71 (0.29-1.67) | 0.72 (0.30-1.74) | 83 (1.2)   | 0.46 (0.06-3.52) | 0.46 (0.06-3.57) | 82 (8.5)   | 0.89 (0.40-2.01) | 0.90 (0.40-2.04) |
| 36 |                            |            |                  |                  |            |                  |                  |            |                  |                  |
| 37 |                            |            |                  |                  |            |                  |                  |            |                  |                  |
| 38 |                            |            |                  |                  |            |                  |                  |            |                  |                  |
| 39 |                            |            |                  |                  |            |                  |                  |            |                  |                  |
| 40 |                            |            |                  |                  |            |                  |                  |            |                  |                  |
| 41 |                            |            |                  |                  |            |                  |                  |            |                  |                  |
| 42 |                            |            |                  |                  |            |                  |                  |            |                  |                  |
| 43 |                            |            |                  |                  |            |                  |                  |            |                  |                  |
| 44 |                            |            |                  |                  |            |                  |                  |            |                  |                  |
| 45 |                            |            |                  |                  |            |                  |                  |            |                  |                  |
| 46 |                            |            |                  |                  |            |                  |                  |            |                  |                  |
| 47 |                            |            |                  |                  |            |                  |                  |            |                  |                  |

1  
2  
3  
4  
5  
6  
7  
8  
9  
10  
11  
12  
13  
14  
15  
16  
17  
18  
19  
20  
21  
22  
23  
24  
25  
26  
27  
28  
29  
30  
31  
32  
33  
34  
35  
36  
37  
38  
39  
40  
41  
42  
43  
44  
45  
46  
47

**Ghana/Not obese**

|     |            |                  |                  |            |                  |                  |            |                  |                  |
|-----|------------|------------------|------------------|------------|------------------|------------------|------------|------------------|------------------|
| No  | 1811 (8.9) | 1.00 (Reference) | 1.00 (Reference) | 1822 (3.9) | 1.00 (Reference) | 1.00 (Reference) | 1808 (9.4) | 1.00 (Reference) | 1.00 (Reference) |
| Yes | 100 (6.0)  | 0.57 (0.24-1.33) | 0.56 (0.24-1.32) | 100 (2.0)  | 0.38 (0.09-1.63) | 0.38 (0.09-1.63) | 100 (8.0)  | 0.69 (0.32-1.46) | 0.69 (0.32-1.47) |

**Ghana/Obese**

|     |            |                  |                  |           |                   |                  |            |                  |                  |
|-----|------------|------------------|------------------|-----------|-------------------|------------------|------------|------------------|------------------|
| No  | 398 (13.8) | 1.00 (Reference) | 1.00 (Reference) | 397 (3.5) | 1.00 (Reference)  | 1.00 (Reference) | 396 (14.7) | 1.00 (Reference) | 1.00 (Reference) |
| Yes | 14 (0.0)   | *** (****_****)  | *** (****_****)  | 14 (7.1)  | 1.76 (0.21-14.89) | 2.14 (0.25-8.78) | 14 (7.1)   | 0.42 (0.05-3.32) | 0.38 (0.05-3.07) |

Model 1, adjusted for age and sex; Model 2, adjusted for age, sex, and educational level for Ghanaians (SSA) and length of stay for those in Europe; Abbreviations: CI, confidence interval; ACR, albumin creatinine ration; eGFR, estimated glomerular filtration rate; CKD, chronic kidney disease; OR, odds ratio, n= total number of Ghanaians living in Ghana and Europe among the various levels of PS constructs; %, proportion of individuals with CKD among the various levels of PS constructs in Ghana and Europe.

For peer review only

**S3: Association of psychosocial stressors (PS) indicators (negative life events, discrimination, stress at work/home and depression) with albuminuria, reduced eGFR and CKD risk for Ghanaians living in Ghana and those living in Europe stratified by diabetes status**

|                           | Albuminuria (ACR $\geq$ 3 mg/mmol) |                  |                  | eGFR < 60 mL/min/1.73 m <sup>2</sup> |                  |                   | High to very high CKD risk (KDIGO, 2012) |                  |                  |
|---------------------------|------------------------------------|------------------|------------------|--------------------------------------|------------------|-------------------|------------------------------------------|------------------|------------------|
|                           | n (%)                              | OR (95% CI)      | Model 2          | n (%)                                | OR (95% CI)      | Model 2           | n cases (%)                              | OR (95% CI)      | Model 2          |
| <b>Negative events</b>    |                                    |                  |                  |                                      |                  |                   |                                          |                  |                  |
| <b>Europe/No diabetes</b> |                                    |                  |                  |                                      |                  |                   |                                          |                  |                  |
| No                        | 986 (8.0)                          | 1.00 (Reference) | 1.00 (Reference) | 971 (2.1)                            | 1.00 (Reference) | 1.00 (Reference)  | 957 (7.9)                                | 1.00 (Reference) | 1.00 (Reference) |
| Yes                       | 1359 (7.7)                         | 0.95 (0.70-1.29) | 0.97 (0.71-1.34) | 1340 (2.0)                           | 0.90 (0.50-1.63) | 0.90 (0.48-1.68)  | 1315 (8.1)                               | 1.01 (0.75-1.37) | 0.99 (0.72-1.36) |
| <b>Europe/Diabetes</b>    |                                    |                  |                  |                                      |                  |                   |                                          |                  |                  |
| No                        | 142 (9.9)                          | 1.00 (Reference) | 1.00 (Reference) | 135 (6.7)                            | 1.00 (Reference) | 1.00 (Reference)  | 133 (12.8)                               | 1.00 (Reference) | 1.00 (Reference) |
| Yes                       | 256 (12.5)                         | 1.28 (0.66-2.50) | 1.41 (0.71-2.82) | 247 (4.9)                            | 0.75 (0.29-1.89) | 10.68 (0.27-1.77) | 242 (11.2)                               | 0.87 (0.46-1.69) | 0.96 (0.49-1.88) |
| <b>Ghana/No diabetes</b>  |                                    |                  |                  |                                      |                  |                   |                                          |                  |                  |
| No                        | 683 (9.1)                          | 1.00 (Reference) | 1.00 (Reference) | 687 (4.1)                            | 1.00 (Reference) | 1.00 (Reference)  | 683 (9.8)                                | 1.00 (Reference) | 1.00 (Reference) |
| Yes                       | 1447 (7.7)                         | 0.84 (0.60-1.16) | 0.82 (0.59-1.14) | 1451 (3.1)                           | 0.69 (0.42-1.13) | 0.69 (0.42-1.13)  | 1442 (8.3)                               | 0.82 (0.59-1.12) | 0.80 (0.58-1.10) |
| <b>Ghana/Diabetes</b>     |                                    |                  |                  |                                      |                  |                   |                                          |                  |                  |
| No                        | 49 (28.3)                          | 1.00 (Reference) | 1.00 (Reference) | 49 (10.2)                            | 1.00 (Reference) | 1.00 (Reference)  | 49 (26.4)                                | 1.00 (Reference) | 1.00 (Reference) |
| Yes                       | 148 (24.3)                         | 0.78 (0.37-1.61) | 0.72 (0.34-1.52) | 150 (7.3)                            | 0.55 (0.16-1.81) | 0.57 (0.17-1.88)  | 148 (26.4)                               | 0.93 (0.45-1.97) | 0.90 (0.43-1.92) |
| <b>Discrimination</b>     |                                    |                  |                  |                                      |                  |                   |                                          |                  |                  |
| <b>Europe/No diabetes</b> |                                    |                  |                  |                                      |                  |                   |                                          |                  |                  |
| No                        | 1629 (7.9)                         | 1.00 (Reference) | 1.00 (Reference) | 1609 (2.2)                           | 1.00 (Reference) | 1.00 (Reference)  | 1580 (8.3)                               | 1.00 (Reference) | 1.00 (Reference) |
| Yes                       | 684 (6.7)                          | 0.85 (0.60-1.21) | 0.89 (0.62-1.28) | 669 (1.5)                            | 0.68 (0.33-1.40) | 0.69 (0.32-1.47)  | 661 (7.0)                                | 0.84 (0.59-1.20) | 0.86 (0.59-1.25) |
| <b>Europe/Diabetes</b>    |                                    |                  |                  |                                      |                  |                   |                                          |                  |                  |
| No                        | 270 (11.9)                         | 1.00 (Reference) | 1.00 (Reference) | 258 (5.4)                            | 1.00 (Reference) | 1.00 (Reference)  | 252 (13.1)                               | 1.00 (Reference) | 1.00 (Reference) |
| Yes                       | 126 (11.1)                         | 0.87 (0.44-1.71) | 0.89 (0.45-1.76) | 122 (5.7)                            | 1.29 (0.48-3.45) | 1.25 (0.46-3.37)  | 121 (9.1)                                | 0.68 (0.32-1.40) | 0.69 (0.33-1.42) |
| <b>Ghana/No diabetes</b>  |                                    |                  |                  |                                      |                  |                   |                                          |                  |                  |
| No                        | 1854 (8.4)                         | 1.00 (Reference) | 1.00 (Reference) | 1865 (3.5)                           | 1.00 (Reference) | 1.00 (Reference)  | 1851 (9.0)                               | 1.00 (Reference) | 1.00 (Reference) |
| Yes                       | 99 (8.1)                           | 1.03 (0.49-2.17) | 1.04 (0.49-2.19) | 99 (2.0)                             | 0.79 (0.19-3.33) | 0.78 (0.18-3.29)  | 99 (7.1)                                 | 0.87 (0.39-1.93) | 0.88 (0.39-1.95) |



1  
2  
3  
4  
5  
6  
7  
8  
9  
10  
11  
12  
13  
14  
15  
16  
17  
18  
19  
20  
21  
22  
23  
24  
25  
26  
27  
28  
29  
30  
31  
32  
33  
34  
35  
36  
37  
38  
39  
40  
41  
42  
43  
44  
45  
46  
47

**Ghana/Diabetes**

|     |            |                  |                  |           |                  |                  |            |                  |                  |
|-----|------------|------------------|------------------|-----------|------------------|------------------|------------|------------------|------------------|
| No  | 180 (26.7) | 1.00 (Reference) | 1.00 (Reference) | 182 (7.7) | 1.00 (Reference) | 1.00 (Reference) | 180 (27.2) | 1.00 (Reference) | 1.00 (Reference) |
| Yes | 5 (0.0)    | **** (***_***)   | 0.40 (0.05-3.11) | 5 (0.0)   | **** (***_***)   | **** (***_***)   | 5 (0.0)    | **** (***_***)   | **** (***_***)   |

**Stress at home/work**

**Europe/No diabetes**

|                            |            |                  |                  |            |                  |                  |            |                  |                  |
|----------------------------|------------|------------------|------------------|------------|------------------|------------------|------------|------------------|------------------|
| Never                      | 1137 (7.9) | 1.00 (Reference) | 1.00 (Reference) | 1127 (2.3) | 1.00 (Reference) | 1.00 (Reference) | 1102 (8.0) | 1.00 (Reference) | 1.00 (Reference) |
| Some stress                | 860 (7.2)  | 0.90 (0.65-1.27) | 0.96 (0.68-1.36) | 850 (1.2)  | 0.49 (0.24-1.02) | 0.49 (0.22-1.07) | 835 (7.4)  | 0.94 (0.67-1.31) | 0.99 (0.69-1.41) |
| Several/Permanent stresses | 335 (8.4)  | 1.04 (0.67-1.62) | 1.07 (0.68-1.70) | 327 (2.1)  | 0.84 (0.36-1.95) | 0.92 (0.39-2.17) | 322 (9.6)  | 1.20 (0.77-1.85) | 1.28 (0.82-1.99) |

**Europe/Diabetes**

|                            |            |                  |                  |           |                  |                  |            |                  |                  |
|----------------------------|------------|------------------|------------------|-----------|------------------|------------------|------------|------------------|------------------|
| Never                      | 193 (9.8)  | 1.00 (Reference) | 1.00 (Reference) | 184 (8.2) | 1.00 (Reference) | 1.00 (Reference) | 180 (11.7) | 1.00 (Reference) | 1.00 (Reference) |
| Some stress                | 142 (12.7) | 1.22 (0.61-2.45) | 1.38 (0.67-2.81) | 134 (3.0) | 0.43 (0.13-1.39) | 0.40 (0.12-1.29) | 133 (12.0) | 1.04 (0.52-2.09) | 1.13 (0.56-2.32) |
| Several/Permanent stresses | 62 (12.9)  | 1.31 (0.54-3.16) | 1.38 (0.56-3.41) | 63 (3.2)  | 0.49 (0.10-2.29) | 0.46 (0.10-2.23) | 61 (9.8)   | 0.82 (0.31-2.13) | 0.89 (0.34-2.35) |

**Ghana/No diabetes**

|                            |            |                  |                  |            |                  |                  |            |                  |                  |
|----------------------------|------------|------------------|------------------|------------|------------------|------------------|------------|------------------|------------------|
| Never                      | 628 (7.8)  | 1.00 (Reference) | 1.00 (Reference) | 634 (2.7)  | 1.00 (Reference) | 1.00 (Reference) | 628 (7.6)  | 1.00 (Reference) | 1.00 (Reference) |
| Some stress                | 1163 (8.6) | 1.06 (0.74-1.51) | 0.97 (0.67-1.39) | 1163 (3.7) | 1.27 (0.71-2.27) | 1.32 (0.74-2.34) | 1158 (9.3) | 1.15 (0.80-1.65) | 1.10 (0.77-1.58) |
| Several/permanent stresses | 339 (7.4)  | 0.88 (0.53-1.46) | 0.76 (0.46-1.27) | 341 (3.5)  | 1.24 (0.58-2.67) | 1.35 (0.62-2.95) | 339 (8.9)  | 1.07 (0.66-1.73) | 1.00 (0.61-1.64) |

**Ghana/Diabetes**

|                            |            |                         |                         |           |                  |                  |            |                         |                         |
|----------------------------|------------|-------------------------|-------------------------|-----------|------------------|------------------|------------|-------------------------|-------------------------|
| Never                      | 54 (38.9)  | 1.00 (Reference)        | 1.00 (Reference)        | 54 (11.1) | 1.00 (Reference) | 1.00 (Reference) | 54 (37.0)  | 1.00 (Reference)        | 1.00 (Reference)        |
| Some stress                | 116 (18.9) | <b>0.37 (0.37-0.77)</b> | <b>0.35 (0.17-0.75)</b> | 116 (6.0) | 0.47 (0.14-1.60) | 0.45 (0.12-1.55) | 116 (19.8) | <b>0.43 (0.21-0.89)</b> | <b>0.40 (0.19-0.86)</b> |
| Several/Permanent stresses | 26 (25.0)  | 0.44 (0.44-1.29)        | 0.39 (0.13-1.19)        | 28 (10.7) | 0.65 (0.13-3.21) | 0.62 (0.12-3.23) | 26 (30.8)  | 0.69 (0.25-1.93)        | 0.64 (0.22-1.87)        |

**Depressive symptoms**

**Europe/No diabetes**

|     |            |                  |                  |            |                  |                  |            |                  |                  |
|-----|------------|------------------|------------------|------------|------------------|------------------|------------|------------------|------------------|
| No  | 2154 (8.0) | 1.00 (Reference) | 1.00 (Reference) | 2122 (2.1) | 1.00 (Reference) | 1.00 (Reference) | 2087 (8.1) | 1.00 (Reference) | 1.00 (Reference) |
| Yes | 167 (5.4)  | 0.63 (0.32-1.25) | 0.69 (0.34-1.38) | 163 (2.0)  | 0.65 (0.15-2.72) | 0.72 (0.17-3.04) | 161 (6.8)  | 0.58 (0.25-1.35) | 0.86 (0.46-1.64) |

**Europe/Diabetes**

|    |                       |            |                  |                  |            |                  |                  |            |                  |                  |
|----|-----------------------|------------|------------------|------------------|------------|------------------|------------------|------------|------------------|------------------|
| 1  |                       |            |                  |                  |            |                  |                  |            |                  |                  |
| 2  |                       |            |                  |                  |            |                  |                  |            |                  |                  |
| 3  | No                    | 351 (12.0) | 1.00 (Reference) | 1.00 (Reference) | 335 (35.9) | 1.00 (Reference) | 1.00 (Reference) | 329 (12.5) | 1.00 (Reference) | 1.00 (Reference) |
| 4  | Yes                   | 39 (10.3)  | 0.79 (0.26-1.35) | 0.73 (0.24-2.19) | 39 (2.6)   | 0.49 (0.06-3.97) | 0.49 (0.06-3.99) | 38 (7.9)   | 0.89 (0.40-2.01) | 0.60 (0.17-2.08) |
| 5  | <b>Ghana/No</b>       |            |                  |                  |            |                  |                  |            |                  |                  |
| 6  | <b>diabetes</b>       |            |                  |                  |            |                  |                  |            |                  |                  |
| 7  | No                    | 2027 (8.3) | 1.00 (Reference) | 1.00 (Reference) | 2035 (3.4) | 1.00 (Reference) | 1.00 (Reference) | 2022 (8.8) | 1.00 (Reference) | 1.00 (Reference) |
| 8  | Yes                   | 102 (4.9)  | 0.50 (0.20-1.25) | 0.48 (0.19-1.19) | 102 (2.9)  | 0.64 (0.19-2.13) | 0.67 (0.20-2.21) | 102 (7.8)  | 0.69 (0.32-1.46) | 0.71 (0.34-1.51) |
| 9  | <b>Ghana/Diabetes</b> |            |                  |                  |            |                  |                  |            |                  |                  |
| 10 | No                    | 185 (26.5) | 1.00 (Reference) | 1.00 (Reference) | 187 (8.7)  | 1.00 (Reference) | 1.00 (Reference) | 185 (27.6) | 1.00 (Reference) | 1.00 (Reference) |
| 11 | Yes                   | 12 (8.3)   | 0.27 (0.03-2.13) | 0.25 (0.03-2.01) | 12 (0.0)   | *** (***-***)    | *** (***-***)    | 12 (8.3)   | 0.42 (0.05-3.32) | 0.27 (0.03-2.19) |
| 12 |                       |            |                  |                  |            |                  |                  |            |                  |                  |
| 13 |                       |            |                  |                  |            |                  |                  |            |                  |                  |
| 14 |                       |            |                  |                  |            |                  |                  |            |                  |                  |
| 15 |                       |            |                  |                  |            |                  |                  |            |                  |                  |

Model 1, adjusted for age and sex; Model 2, adjusted for age, sex, and educational level for Ghanaians (SSA) and length of stay for those in Europe; Abbreviations: CI, confidence interval; ACR, albumin creatinine ration; eGFR, estimated glomerular filtration rate; CKD, chronic kidney disease; OR, odds ratio, n= total number of Ghanaians living in Ghana and Europe among the various levels of PS constructs; %, proportion of individuals with CKD among the various levels of PS constructs in Ghana and Europe.

**S4: Association of psychosocial stressors (PS) indicators (negative life events, discrimination, stress at work/home and depression) with albuminuria, reduced eGFR and CKD risk for Ghanaians living in Ghana and those living in Europe stratified by hypertensive status**

|                               | Albuminuria (ACR $\geq$ 3 mg/mmol) |                  |                  | eGFR < 60 mL/min/1.73 m <sup>2</sup> |                  |                  | High to very high CKD risk (KDIGO, 2012) |                         |                         |
|-------------------------------|------------------------------------|------------------|------------------|--------------------------------------|------------------|------------------|------------------------------------------|-------------------------|-------------------------|
|                               | n (%)                              | OR (95% CI)      |                  | n (%)                                | OR (95% CI)      |                  | n cases (%)                              | OR (95% CI)             |                         |
|                               |                                    | Model 1          | Model 2          |                                      | Model 1          | Model 2          |                                          | Model 1                 | Model 2                 |
| <b>Negative events</b>        |                                    |                  |                  |                                      |                  |                  |                                          |                         |                         |
| <b>Europe/No hypertension</b> |                                    |                  |                  |                                      |                  |                  |                                          |                         |                         |
| No                            | 568 (6.9)                          | 1.00 (Reference) | 1.00 (Reference) | 562 (1.3)                            | 1.00 (Reference) | 1.00 (Reference) | 551 (7.1)                                | 1.00 (Reference)        | 1.00 (Reference)        |
| Yes                           | 743 (5.0)                          | 0.72 (0.45-1.15) | 0.78 (0.48-1.27) | 740 (0.8)                            | 0.59 (0.19-1.77) | 0.60 (0.20-1.83) | 724 (5.1)                                | 0.71 (0.44-1.13)        | 0.75 (0.46-1.22)        |
| <b>Europe/Hypertension</b>    |                                    |                  |                  |                                      |                  |                  |                                          |                         |                         |
| No                            | 560 (9.6)                          | 1.00 (Reference) | 1.00 (Reference) | 544 (4.0)                            | 1.00 (Reference) | 1.00 (Reference) | 539 (10.0)                               | 1.00 (Reference)        | 1.00 (Reference)        |
| Yes                           | 872 (11.4)                         | 1.22 (0.86-1.73) | 1.20 (0.83-1.73) | 847 (3.9)                            | 0.95 (0.54-1.67) | 0.89 (0.49-1.62) | 833 (11.6)                               | 1.19 (0.83-1.69)        | 1.13 (0.78-1.62)        |
| <b>Ghana/No Hypertension</b>  |                                    |                  |                  |                                      |                  |                  |                                          |                         |                         |
| No                            | 540 (6.3)                          | 1.00 (Reference) | 1.00 (Reference) | 543 (2.2)                            | 1.00 (Reference) | 1.00 (Reference) | 540 (6.9)                                | 1.00 (Reference)        | 1.00 (Reference)        |
| Yes                           | 1118 (5.6)                         | 0.88 (0.57-1.36) | 0.84 (0.54-1.31) | 1124 (1.9)                           | 0.82 (0.39-1.69) | 0.86 (0.41-1.79) | 1115 (6.4)                               | 0.93 (0.61-1.40)        | 0.90 (0.59-1.36)        |
| <b>Ghana/Hypertension</b>     |                                    |                  |                  |                                      |                  |                  |                                          |                         |                         |
| No                            | 192 (21.9)                         | 1.00 (Reference) | 1.00 (Reference) | 193 (10.9)                           | 1.00 (Reference) | 1.00 (Reference) | 192 (22.4)                               | 1.00 (Reference)        | 1.00 (Reference)        |
| Yes                           | 476 (18.1)                         | 0.78 (0.52-1.18) | 0.79 (0.52-1.20) | 476 (6.9)                            | 0.58 (0.32-1.04) | 0.58 (0.33-1.05) | 474 (18.4)                               | 0.77 (0.50-1.16)        | 0.76 (0.51-1.16)        |
| <b>Discrimination</b>         |                                    |                  |                  |                                      |                  |                  |                                          |                         |                         |
| <b>Europe/No hypertension</b> |                                    |                  |                  |                                      |                  |                  |                                          |                         |                         |
| No                            | 916 (6.3)                          | 1.00 (Reference) | 1.00 (Reference) | 907 (0.8)                            | 1.00 (Reference) | 1.00 (Reference) | 885 (6.8)                                | 1.00 (Reference)        | 1.00 (Reference)        |
| Yes                           | 379 (3.7)                          | 0.60 (0.33-1.09) | 0.65 (0.36-1.21) | 378 (1.1)                            | 1.35 (0.39-4.74) | 1.37 (0.38-4.89) | 374 (3.2)                                | <b>0.47 (0.25-0.89)</b> | <b>0.51 (0.27-0.97)</b> |
| <b>Europe/Hypertension</b>    |                                    |                  |                  |                                      |                  |                  |                                          |                         |                         |
| No                            | 983 (10.5)                         | 1.00 (Reference) | 1.00 (Reference) | 960 (4.4)                            | 1.00 (Reference) | 1.00 (Reference) | 947 (10.9)                               | 1.00 (Reference)        | 1.00 (Reference)        |
| Yes                           | 431 (10.7)                         | 1.03 (0.71-1.49) | 1.05 (0.72-1.54) | 413 (3.2)                            | 0.73 (0.38-1.39) | 0.75 (0.38-1.48) | 408 (11.0)                               | 1.03 (0.71-1.49)        | 1.04 (0.71-1.53)        |
| <b>Ghana/No hypertension</b>  |                                    |                  |                  |                                      |                  |                  |                                          |                         |                         |
| No                            | 1427 (5.7)                         | 1.00 (Reference) | 1.00 (Reference) | 1437 (2.2)                           | 1.00 (Reference) | 1.00 (Reference) | 1424 (6.5)                               | 1.00 (Reference)        | 1.00 (Reference)        |

|   |                       |            |                  |                  |           |                  |                  |            |                  |                  |
|---|-----------------------|------------|------------------|------------------|-----------|------------------|------------------|------------|------------------|------------------|
| 1 |                       |            |                  |                  |           |                  |                  |            |                  |                  |
| 2 |                       |            |                  |                  |           |                  |                  |            |                  |                  |
| 3 | Yes                   | 81 (7.4)   | 1.30 (0.55-3.09) | 1.30 (0.55-3.10) | 81 (0.0)  | **** (***_***)   | **** (***_***)   | 81 (7.4)   | 1.21 (0.51-2.88) | 1.22 (0.51-2.89) |
| 4 | <b>Ghana/Hyperten</b> |            |                  |                  |           |                  |                  |            |                  |                  |
| 5 | <b>sion</b>           |            |                  |                  |           |                  |                  |            |                  |                  |
| 6 | No                    | 606 (20.3) | 1.00 (Reference) | 1.00 (Reference) | 609 (7.9) | 1.00 (Reference) | 1.00 (Reference) | 606 (20.3) | 1.00 (Reference) | 1.00 (Reference) |
| 7 | Yes                   | 23 (8.7)   | 0.38 (0.09-1.68) | 0.40 (0.09-1.74) | 23 (8.7)  | 1.27 (0.28-5.70) | 1.20 (0.26-5.44) | 23 (4.4)   | 0.19 (0.03-1.44) | 0.19 (0.03-1.45) |

### 9 Stress at home/work

#### 10 Europe/No hypertension

|    |                            |           |                  |                  |           |                  |                  |           |                  |                  |
|----|----------------------------|-----------|------------------|------------------|-----------|------------------|------------------|-----------|------------------|------------------|
| 11 | Never                      | 644 (6.1) | 1.00 (Reference) | 1.00 (Reference) | 640 (1.3) | 1.00 (Reference) | 1.00 (Reference) | 625 (5.8) | 1.00 (Reference) | 1.00 (Reference) |
| 12 | Some stress                | 468 (4.5) | 0.74 (0.43-1.27) | 0.81 (0.46-1.43) | 464 (0.4) | 0.37 (0.07-1.74) | 0.41 (0.09-2.01) | 457 (4.8) | 0.84 (0.49-1.45) | 0.91 (0.52-1.60) |
| 13 | Several/Permanent stresses | 192 (6.8) | 1.07 (0.56-2.05) | 1.19 (0.61-2.29) | 191 (1.6) | 1.49 (0.38-5.78) | 1.52 (0.39-5.98) | 186 (8.1) | 1.38 (0.74-2.60) | 1.49 (0.79-2.84) |

#### 17 Europe/Hypertension

|    |                            |            |                  |                  |           |                         |                         |            |                  |                  |
|----|----------------------------|------------|------------------|------------------|-----------|-------------------------|-------------------------|------------|------------------|------------------|
| 18 | Never                      | 686 (10.2) | 1.00 (Reference) | 1.00 (Reference) | 665 (5.4) | 1.00 (Reference)        | 1.00 (Reference)        | 657 (11.1) | 1.00 (Reference) | 1.00 (Reference) |
| 19 | Some stress                | 534 (11.1) | 1.03 (0.71-1.49) | 1.05 (0.72-1.54) | 520 (2.3) | <b>0.49 (0.25-0.96)</b> | <b>0.47 (0.23-0.95)</b> | 511 (10.9) | 0.97 (0.67-1.41) | 0.99 (0.67-0.47) |
| 20 | Several/Permanent stresses | 205 (11.2) | 1.11 (0.67-1.82) | 1.12 (0.67-1.87) | 199 (3.0) | 0.56 (0.23-1.37)        | 0.58 (0.24-1.43)        | 197 (11.2) | 0.99 (0.59-1.64) | 1.03 (0.61-1.74) |

#### 24 Ghana/No hypertension

|    |                            |           |                  |                  |           |                  |                  |           |                  |                  |
|----|----------------------------|-----------|------------------|------------------|-----------|------------------|------------------|-----------|------------------|------------------|
| 25 | Never                      | 495 (5.5) | 1.00 (Reference) | 1.00 (Reference) | 498 (1.4) | 1.00 (Reference) | 1.00 (Reference) | 495 (5.9) | 1.00 (Reference) | 1.00 (Reference) |
| 26 | Some stress                | 899 (5.9) | 1.07 (0.66-1.73) | 0.99 (0.61-1.60) | 901 (2.2) | 1.30 (0.54-3.15) | 1.39 (0.57-3.37) | 896 (6.5) | 1.04 (0.65-1.65) | 1.00 (0.63-1.59) |
| 27 | Several/permanent stresses | 263 (5.7) | 1.01 (0.53-1.95) | 0.89 (0.46-1.72) | 267 (2.6) | 1.69 (0.58-5.01) | 1.89 (0.63-5.65) | 263 (7.6) | 1.21 (0.67-2.20) | 1.15 (0.63-2.11) |

#### 30 Ghana/Hypertension

|    |                            |            |                  |                  |           |                  |                  |            |                  |                  |
|----|----------------------------|------------|------------------|------------------|-----------|------------------|------------------|------------|------------------|------------------|
| 31 | Never                      | 187 (22.9) | 1.00 (Reference) | 1.00 (Reference) | 190 (8.4) | 1.00 (Reference) | 1.00 (Reference) | 187 (20.9) | 1.00 (Reference) | 1.00 (Reference) |
| 32 | Some stress                | 379 (18.2) | 0.74 (0.48-1.14) | 0.68 (0.43-1.05) | 377 (7.9) | 0.95 (0.50-1.80) | 0.99 (0.51-1.91) | 377 (19.4) | 0.90 (0.58-1.40) | 0.87 (0.55-1.36) |
| 33 | Several/Permanent stresses | 102 (15.7) | 0.62 (0.33-1.17) | 0.54 (0.28-1.04) | 102 (7.8) | 0.92 (0.37-2.26) | 0.97 (0.39-2.43) | 102 (17.7) | 0.79 (0.42-1.49) | 0.76 (0.40-1.43) |

### 37 Depressive symptoms

#### 38 Europe/No hypertension

1  
2  
3  
4  
5  
6  
7  
8  
9  
10  
11  
12  
13  
14  
15  
16  
17  
18  
19  
20  
21  
22  
23  
24  
25  
26  
27  
28  
29  
30  
31  
32  
33  
34  
35  
36  
37  
38  
39  
40  
41  
42  
43  
44  
45  
46  
47

|                              |            |                  |                  |            |                   |                   |             |                   |                  |  |
|------------------------------|------------|------------------|------------------|------------|-------------------|-------------------|-------------|-------------------|------------------|--|
| No                           | 1195 (5.9) | 1.00 (Reference) | 1.00 (Reference) | 1187 (1.1) | 1.00 (Reference)  | 1.00 (Reference)  | 1162 (6.0)  | 1.00 (Reference)  | 1.00 (Reference) |  |
| Yes                          | 101 (3.9)  | 0.59 (0.21-1.65) | 0.64 (0.23-1.82) | 99 (1.0)   | 1.18 (0.15-2.72)  | 1.27 (0.16-10.17) | 98 (5.1)    | 0.77 (0.30-1.97)  | 0.84 (0.33-2.17) |  |
| <b>Europe/Hypertension</b>   |            |                  |                  |            |                   |                   |             |                   |                  |  |
| No                           | 1310(10.9) | 1.00 (Reference) | 1.00 (Reference) | 1270 (4.1) | 1.00 (Reference)  | 1.00 (Reference)  | 1254 (11.2) | 1.00 (Reference)  | 1.00 (Reference) |  |
| Yes                          | 105 (8.6)  | 0.76 (0.37-1.53) | 0.75 (0.37-1.55) | 103 (1.9)  | 0.52 (0.12-2.18)  | 0.56 (0.13-2.38)  | 101 (8.9)   | 0.77 (0.38-1.58)  | 0.80 (0.39-1.63) |  |
| <b>Ghana/No hypertension</b> |            |                  |                  |            |                   |                   |             |                   |                  |  |
| No                           | 1575 (5.9) | 1.00 (Reference) | 1.00 (Reference) | 1584 (2.1) | 1.00 (Reference)  | 1.00 (Reference)  | 1572 (6.7)  | 1.00 (Reference)  | 1.00 (Reference) |  |
| Yes                          | 82 (2.4)   | 0.36 (0.09-1.51) | 0.35 (0.08-1.44) | 82 (1.2)   | 0.39 (0.059-2.95) | 0.39 (0.05-2.97)  | 82 (3.7)    | 0.44 (0.13-1.42)  | 0.43 (0.13-1.40) |  |
| <b>Ghana/Hypertension</b>    |            |                  |                  |            |                   |                   |             |                   |                  |  |
| No                           | 636 (19.5) | 1.00 (Reference) | 1.00 (Reference) | 637 (8.2)  | 1.00 (Reference)  | 1.00 (Reference)  | 634 (19.6)  | 1.00 (Reference)  | 1.00 (Reference) |  |
| Yes                          | 32 (12.5)  | 0.59 (0.20-1.72) | 0.59 (0.20-1.74) | 32 (6.3)   | 0.74 (0.17-3.25)  | 0.76 (0.17-3.33)  | 32 (18.8)   | 0.94 (0.037-2.37) | 0.94 (0.38-2.37) |  |

Model 1, adjusted for age and sex; Model 2, adjusted for age, sex, and educational level for Ghanaians (SSA) and length of stay for those in Europe; Abbreviations: CI, confidence interval; ACR, albumin creatinine ration; eGFR, estimated glomerular filtration rate; CKD, chronic kidney disease; OR, odds ratio, n= total number of Ghanaians living in Ghana and Europe among the various levels of PS constructs; %, proportion of individuals with CKD among the various levels of PS constructs in Ghana and Europe.

## STROBE Statement—checklist of items that should be included in reports of observational studies

|                           | Item No. | Recommendation                                                                                      | Page No.        | Relevant text from manuscript                                                                                                                                                                                                                                  |
|---------------------------|----------|-----------------------------------------------------------------------------------------------------|-----------------|----------------------------------------------------------------------------------------------------------------------------------------------------------------------------------------------------------------------------------------------------------------|
| <b>Title and abstract</b> | 1        | (a) Indicate the study's design with a commonly used term in the title or the abstract              | 1 lines 1-3     | We have included a commonly used term in the title and abstract                                                                                                                                                                                                |
|                           |          | (b) Provide in the abstract an informative and balanced summary of what was done and what was found | 3 lines 87-116  | Our study shows no convincing evidence for associations between stress as indicated by four PS constructs and prevalence of CKD. Further studies aimed at identifying potential factors driving the high prevalence of CKD among these populations are needed. |
| <b>Introduction</b>       |          |                                                                                                     |                 |                                                                                                                                                                                                                                                                |
| Background/rationale      | 2        | Explain the scientific background and rationale for the investigation being reported                | 5 lines 180-226 | The theoretical and scientific background as well as the rationale for conducting the study have been provided in the introduction section.                                                                                                                    |
| Objectives                | 3        | State specific objectives, including any pre specified hypotheses                                   | 5 lines 222-226 | We examined the association between PS and CKD prevalence among rural and urban Ghanaians and their migrants living in three European cities. We also                                                                                                          |

assessed if the influence of PS on CKD is partially mediated by primary risk factors (hypertension and diabetes) of CKD.

**Methods**

|                           |    |                                                                                                                                                                                                                                                                                                                                                                                                                                                                        |                        |                                                                                                                                                                                                                                            |
|---------------------------|----|------------------------------------------------------------------------------------------------------------------------------------------------------------------------------------------------------------------------------------------------------------------------------------------------------------------------------------------------------------------------------------------------------------------------------------------------------------------------|------------------------|--------------------------------------------------------------------------------------------------------------------------------------------------------------------------------------------------------------------------------------------|
| Study design              | 4  | Present key elements of study design early in the paper                                                                                                                                                                                                                                                                                                                                                                                                                | -6-7 lines 232-264     | Details given in the methods                                                                                                                                                                                                               |
| Setting                   | 5  | Describe the setting, locations, and relevant dates, including periods of recruitment, exposure, follow-up, and data collection                                                                                                                                                                                                                                                                                                                                        | 6-7 lines 232-264      | Rural or urban Ghana and three (Amsterdam, Berlin, London) European cities (migrants)                                                                                                                                                      |
| Participants              | 6  | (a) <i>Cohort study</i> —Give the eligibility criteria, and the sources and methods of selection of participants. Describe methods of follow-up<br><i>Case-control study</i> —Give the eligibility criteria, and the sources and methods of case ascertainment and control selection. Give the rationale for the choice of cases and controls<br><i>Cross-sectional study</i> —Give the eligibility criteria, and the sources and methods of selection of participants | Pg. 7 lines 254-264    | A multi-centred cross sectional baseline data from the Research on Obesity and Diabetes among African Migrants (RODAM) study. A random sample of 5,659 adults (Europe, 3167, rural, 1,043, Urban Ghana, 1,449, Ghana) aged 25 to 70 years. |
|                           |    | (b) <i>Cohort study</i> —For matched studies, give matching criteria and number of exposed and unexposed<br><i>Case-control study</i> —For matched studies, give matching criteria and the number of controls per case                                                                                                                                                                                                                                                 |                        |                                                                                                                                                                                                                                            |
| Variables                 | 7  | Clearly define all outcomes, exposures, predictors, potential confounders, and effect modifiers. Give diagnostic criteria, if applicable                                                                                                                                                                                                                                                                                                                               | Pg. 7-10 lines 266-357 | The main outcomes have been clearly defined.                                                                                                                                                                                               |
| Data sources/ measurement | 8* | For each variable of interest, give sources of data and details of methods of assessment (measurement). Describe comparability of assessment methods if there is more than one group                                                                                                                                                                                                                                                                                   | Pg. 7-10 lines 266-357 | We defined each variable of interest in the methods                                                                                                                                                                                        |

|            |    |                                                           |                     |                                                                                         |
|------------|----|-----------------------------------------------------------|---------------------|-----------------------------------------------------------------------------------------|
|            |    |                                                           |                     | accordingly                                                                             |
| Bias       | 9  | Describe any efforts to address potential sources of bias | Pg. 9 lines 315-331 | Potential sources of bias have been reported in the methods sections.                   |
| Study size | 10 | Explain how the study size was arrived at                 | Pg. 7 lines 259-264 | Given in the methods section and we have also referred to the RODAM study methods paper |

Continued on next page

For peer review only



|    |                  |     |                                                                                                      |             |                                   |
|----|------------------|-----|------------------------------------------------------------------------------------------------------|-------------|-----------------------------------|
| 1  |                  |     |                                                                                                      |             |                                   |
| 2  | Quantitative     | 11  | Explain how quantitative variables were handled in the analyses. If applicable, describe which       | Pg. 10-11   | Please see methods                |
| 3  | variables        |     | groupings were chosen and why                                                                        | lines 368-  |                                   |
| 4  |                  |     |                                                                                                      | 388         |                                   |
| 5  |                  |     |                                                                                                      |             |                                   |
| 6  | Statistical      | 12  | (a) Describe all statistical methods, including those used to control for confounding                | Pg. 10-11   | Please see methods                |
| 7  | methods          |     |                                                                                                      | lines 367-  |                                   |
| 8  |                  |     |                                                                                                      | 387         |                                   |
| 9  |                  |     |                                                                                                      |             |                                   |
| 10 |                  |     | (b) Describe any methods used to examine subgroups and interactions                                  | Pg. 10-11   | Please see methods                |
| 11 |                  |     |                                                                                                      | lines 367-  |                                   |
| 12 |                  |     |                                                                                                      | 387         |                                   |
| 13 |                  |     |                                                                                                      |             |                                   |
| 14 |                  |     | (c) Explain how missing data were addressed                                                          | Pg. 7 lines |                                   |
| 15 |                  |     |                                                                                                      | 259-264     |                                   |
| 16 |                  |     | (d) <i>Cohort study</i> —If applicable, explain how loss to follow-up was addressed                  | NA          | We have reported non-response     |
| 17 |                  |     | <i>Case-control study</i> —If applicable, explain how matching of cases and controls was addressed   |             | across sites                      |
| 18 |                  |     | <i>Cross-sectional study</i> —If applicable, describe analytical methods taking account of sampling  |             |                                   |
| 19 |                  |     | strategy                                                                                             |             |                                   |
| 20 |                  |     |                                                                                                      |             |                                   |
| 21 |                  |     | (e) Describe any sensitivity analyses                                                                | NA          |                                   |
| 22 |                  |     |                                                                                                      |             |                                   |
| 23 | <b>Results</b>   |     |                                                                                                      |             |                                   |
| 24 | Participants     | 13* | (a) Report numbers of individuals at each stage of study—eg numbers potentially eligible, examined   | Pg. 7 lines | Non-response analysis was done to |
| 25 |                  |     | for eligibility, confirmed eligible, included in the study, completing follow-up, and analysed       | 254-264     | shed light on the differential    |
| 26 |                  |     |                                                                                                      |             | response rates across sites       |
| 27 |                  |     | (b) Give reasons for non-participation at each stage                                                 | Pg. 7 lines |                                   |
| 28 |                  |     |                                                                                                      | 259-264     |                                   |
| 29 |                  |     |                                                                                                      |             |                                   |
| 30 |                  |     | (c) Consider use of a flow diagram                                                                   | Pg. 6 lines | We have also referred to RODAM    |
| 31 |                  |     |                                                                                                      | 232-234     | methods paper                     |
| 32 | Descriptive data | 14* | (a) Give characteristics of study participants (eg demographic, clinical, social) and information on | Pg. 7 lines | We have also referred to RODAM    |
| 33 |                  |     | exposures and potential confounders                                                                  | 269-357     | methods paper                     |
| 34 |                  |     | (b) Indicate number of participants with missing data for each variable of interest                  | Pg. 7 lines | We have also referred to RODAM    |
| 35 |                  |     |                                                                                                      | 260-264     | methods paper                     |
| 36 |                  |     |                                                                                                      |             |                                   |
| 37 |                  |     | (c) <i>Cohort study</i> —Summarise follow-up time (eg, average and total amount)                     | NA          |                                   |
| 38 | Outcome data     | 15* | <i>Cohort study</i> —Report numbers of outcome events or summary measures over time                  | NA          |                                   |
| 39 |                  |     | <i>Case-control study</i> —Report numbers in each exposure category, or summary measures of exposure | NA          |                                   |
| 40 |                  |     |                                                                                                      |             |                                   |
| 41 |                  |     |                                                                                                      |             |                                   |
| 42 |                  |     |                                                                                                      |             |                                   |
| 43 |                  |     |                                                                                                      |             |                                   |
| 44 |                  |     |                                                                                                      |             |                                   |
| 45 |                  |     |                                                                                                      |             |                                   |
| 46 |                  |     |                                                                                                      |             |                                   |

|                          |    |                                                                                                                                                                                                              |                            |                                                                                                                                                  |
|--------------------------|----|--------------------------------------------------------------------------------------------------------------------------------------------------------------------------------------------------------------|----------------------------|--------------------------------------------------------------------------------------------------------------------------------------------------|
|                          |    | <i>Cross-sectional study</i> —Report numbers of outcome events or summary measures                                                                                                                           | Pg. 11-13                  | Summary measures are given in the results section and in tables and figures                                                                      |
| Main results             | 16 | (a) Give unadjusted estimates and, if applicable, confounder-adjusted estimates and their precision (eg, 95% confidence interval). Make clear which confounders were adjusted for and why they were included | Pg. 11-23<br>lines 406-521 | Unadjusted and adjusted estimates are given in the results section and in figures                                                                |
|                          |    | (b) Report category boundaries when continuous variables were categorized                                                                                                                                    | Pg. 11-23<br>lines 389-521 | We have provided mean and corresponding standard deviations for the continuous variables.                                                        |
|                          |    | (c) If relevant, consider translating estimates of relative risk into absolute risk for a meaningful time                                                                                                    | NA                         |                                                                                                                                                  |
| Continued on next page   |    |                                                                                                                                                                                                              |                            |                                                                                                                                                  |
| Other analyses           | 17 | Report other analyses done—eg analyses of subgroups and interactions, and sensitivity analyses                                                                                                               | NA                         |                                                                                                                                                  |
| <b>Discussion</b>        |    |                                                                                                                                                                                                              |                            |                                                                                                                                                  |
| Key results              | 18 | Summarise key results with reference to study objectives                                                                                                                                                     | Pg. 24 lines<br>524--531   |                                                                                                                                                  |
| Limitations              | 19 | Discuss limitations of the study, taking into account sources of potential bias or imprecision. Discuss both direction and magnitude of any potential bias                                                   | Pg. 25 lines<br>584-596    | Key limitations regarding study methods including differential response rates and sampling methods in the various study sites have been provided |
| Interpretation           | 20 | Give a cautious overall interpretation of results considering objectives, limitations, multiplicity of analyses, results from similar studies, and other relevant evidence                                   | Pg. 24-26<br>lines 522-603 | Cautious overall interpretation of the key findings have been provided.                                                                          |
| Generalisability         | 21 | Discuss the generalisability (external validity) of the study results                                                                                                                                        | Pg. 25 lines<br>584-596    |                                                                                                                                                  |
| <b>Other information</b> |    |                                                                                                                                                                                                              |                            |                                                                                                                                                  |
| Funding                  | 22 | Give the source of funding and the role of the funders for the present study and, if applicable, for the original study on which the present article is based                                                | Pg. 26 lines<br>624-630    | The funders had no role in study design, data collection and analysis, decision to publish, or preparation of the manuscript                     |

\*Give information separately for cases and controls in case-control studies and, if applicable, for exposed and unexposed groups in cohort and cross-sectional studies.

1  
2  
3  
4  
5  
6  
7  
8  
9  
10  
11  
12  
13  
14  
15  
16  
17  
18  
19  
20  
21  
22  
23  
24  
25  
26  
27  
28  
29  
30  
31  
32  
33  
34  
35  
36  
37  
38  
39  
40  
41  
42  
43  
44  
45  
46

**Note:** An Explanation and Elaboration article discusses each checklist item and gives methodological background and published examples of transparent reporting. The STROBE checklist is best used in conjunction with this article (freely available on the Web sites of PLoS Medicine at <http://www.plosmedicine.org/>, Annals of Internal Medicine at <http://www.annals.org/>, and Epidemiology at <http://www.epidem.com/>). Information on the STROBE Initiative is available at [www.strobe-statement.org](http://www.strobe-statement.org).

For peer review only
