# Supplementary material for: Cross-sectional study of association between psychosocial stressors with chronic kidney disease among migrant and non-migrant Ghanaians living in Europe and Ghana: the RODAM study
Source: PubMed Central journal article supplement (PMC6688695; doi:10.1136/bmjopen-2018-027931), 2019-08-01
Supplement: bmjopen-2018-027931supp001.pdf [file bmjopen-2018-027931supp001.pdf]

## Supplementary Tables

**S1: Association of psychosocial stressors (PS) indicators (negative life events, discrimination, stress at work/home and depression) with albuminuria, reduced eGFR and CKD risk for Ghanaians living in Ghana and those living in Europe**

|                            | Albuminuria (ACR $\geq$ 3 mg/mmol) |                  | eGFR < 60 mL/min/1.73 m <sup>2</sup> |                  | High to very high CKD risk (KDIGO, 2012) |                  |
|----------------------------|------------------------------------|------------------|--------------------------------------|------------------|------------------------------------------|------------------|
|                            | OR (95% CI)                        |                  | OR (95% CI)                          |                  | OR (95% CI)                              |                  |
|                            | n (%)                              | Model 3          | n (%)                                | Model 3          | n cases (%)                              | Model 3          |
| <b>Negative events</b>     |                                    |                  |                                      |                  |                                          |                  |
| <b>Europe</b>              |                                    |                  |                                      |                  |                                          |                  |
| No                         | 1128 (8.2)                         | 1.00 (Reference) | 1106 (2.6)                           | 1.00 (Reference) | 1090 (8.5)                               | 1.00 (Reference) |
| Yes                        | 1615 (8.4)                         | 0.95 (0.70-1.30) | 1587 (2.5)                           | 0.77 (0.44-1.37) | 1557 (8.6)                               | 0.92 (0.67-1.26) |
| <b>Ghana</b>               |                                    |                  |                                      |                  |                                          |                  |
| No                         | 732 (10.4)                         | 1.00 (Reference) | 736 (4.5)                            | 1.00 (Reference) | 732 (10.9)                               | 1.00 (Reference) |
| Yes                        | 1595 (9.2)                         | 0.79 (0.58-1.07) | 1601 (3.4)                           | 0.69 (0.43-1.09) | 1590 (9.9)                               | 0.79 (0.58-1.06) |
| <b>Discrimination</b>      |                                    |                  |                                      |                  |                                          |                  |
| <b>Europe</b>              |                                    |                  |                                      |                  |                                          |                  |
| No                         | 1899 (8.5)                         | 1.00 (Reference) | 1867 (2.6)                           | 1.00 (Reference) | 1832 (8.9)                               | 1.00 (Reference) |
| Yes                        | 810 (7.4)                          | 0.87 (0.61-1.21) | 791 (2.2)                            | 0.87 (0.45-1.65) | 782 (7.3)                                | 0.79 (0.55-1.12) |
| <b>Ghana</b>               |                                    |                  |                                      |                  |                                          |                  |
| No                         | 2034 (10.0)                        | 1.00 (Reference) | 2047 (3.9)                           | 1.00 (Reference) | 2031 (10.6)                              | 1.00 (Reference) |
| Yes                        | 104 (7.7)                          | 0.92 (0.43-1.98) | 104 (1.9)                            | 0.65 (0.15-2.79) | 104 (6.7)                                | 0.74 (0.33-1.66) |
| <b>Stress at home/work</b> |                                    |                  |                                      |                  |                                          |                  |
| <b>Europe</b>              |                                    |                  |                                      |                  |                                          |                  |
| Never                      | 1330 (8.2)                         | 1.00 (Reference) | 1305 (3.4)                           | 1.00 (Reference) | 1282 (8.5)                               | 1.00 (Reference) |
| Some stress                | 1002 (7.9)                         | 1.01 (0.72-1.41) | 984 (1.4)                            | 0.51 (0.25-1.04) | 968 (8.1)                                | 1.01 (0.72-1.42) |
| Several/Permanent stresses | 397 (9.1)                          | 1.00 (0.64-1.59) | 390 (2.3)                            | 0.91 (0.40-2.03) | 383 (9.7)                                | 1.15 (0.74-1.79) |
| <b>Ghana</b>               |                                    |                  |                                      |                  |                                          |                  |

|                            |            |                  |            |                  |             |                  |
|----------------------------|------------|------------------|------------|------------------|-------------|------------------|
| Never                      | 682 (10.3) | 1.00 (Reference) | 688 (3.3)  | 1.00 (Reference) | 682 (9.9)   | 1.00 (Reference) |
| Some stress                | 1279 (9.5) | 0.78 (0.56-1.09) | 1279 (3.9) | 1.14 (0.67-1.93) | 1274 (10.3) | 0.93 (0.67-1.29) |
| Several/Permanent stresses | 365 (8.5)  | 0.70 (0.43-1.13) | 369 (4.1)  | 1.32 (0.65-1.68) | 365 (10.4)  | 0.97 (0.62-1.52) |

**Depressive symptoms**

**Europe**

|     |            |                  |            |                  |            |                  |
|-----|------------|------------------|------------|------------------|------------|------------------|
| No  | 2505 (8.5) | 1.00 (Reference) | 2457 (2.7) | 1.00 (Reference) | 2416 (8.7) | 1.00 (Reference) |
| Yes | 206 (6.3)  | 0.65 (0.33-1.28) | 202 (1.5)  | 0.94 (0.28-3.14) | 199 (7.1)  | 0.78 (0.41-1.47) |

**Ghana**

|     |            |                  |            |                  |             |                  |
|-----|------------|------------------|------------|------------------|-------------|------------------|
| No  | 2212 (9.9) | 1.00 (Reference) | 2222 (3.8) | 1.00 (Reference) | 2207 (10.4) | 1.00 (Reference) |
| Yes | 114 (5.3)  | 0.41 (0.16-1.04) | 114 (2.6)  | 0.58 (0.17-1.95) | 114 (7.9)   | 0.62 (0.28-1.31) |

Model 3, adjusted for age, sex educational level, hypertension, diabetes, hypercholesterolemia, BMI, physical activity and smoking; Abbreviations: CI, confidence interval; ACR, albumin creatinine ratio; eGFR, estimated glomerular filtration rate; CKD, chronic kidney disease; OR, odds ratio, n= total number of Ghanaians living in Ghana and Europe among the various levels of PS constructs; %, proportion of individuals with CKD among the various levels of PS constructs in Ghana and Europe.

**S2: Association of psychosocial stressors (PS) indicators (negative life events, discrimination, stress at work/home and depression) with albuminuria, reduced eGFR and CKD risk for Ghanaians living in Ghana and those living in Europe stratified by obesity status**

|                         | Albuminuria (ACR ≥ 3 mg/mmol) |                  |                  | eGFR < 60 mL/min/1.73 m <sup>2</sup> |                  |                  | High to very high CKD risk (KDIGO, 2012) |                         |                         |
|-------------------------|-------------------------------|------------------|------------------|--------------------------------------|------------------|------------------|------------------------------------------|-------------------------|-------------------------|
|                         | n (%)                         | OR (95% CI)      |                  | n (%)                                | OR (95% CI)      |                  | n cases (%)                              | OR (95% CI)             |                         |
|                         |                               | Model 1          | Model 2          |                                      | Model 1          | Model 2          |                                          | Model 1                 | Model 2                 |
| <b>Negative events</b>  |                               |                  |                  |                                      |                  |                  |                                          |                         |                         |
| <b>Europe/Not obese</b> |                               |                  |                  |                                      |                  |                  |                                          |                         |                         |
| No                      | 736 (7.4)                     | 1.00 (Reference) | 1.00 (Reference) | 729 (2.5)                            | 1.00 (Reference) | 1.00 (Reference) | 719 (8.5)                                | 1.00 (Reference)        | 1.00 (Reference)        |
| Yes                     | 1003 (7.7)                    | 0.98 (0.67-1.40) | 0.99 (0.69-1.43) | 992 (2.0)                            | 0.77 (0.40-1.48) | 0.71 (0.36-1.42) | 971 (7.9)                                | 0.91 (0.64-1.29)        | 0.89 (0.62-1.29)        |
| <b>Europe/Obese</b>     |                               |                  |                  |                                      |                  |                  |                                          |                         |                         |
| No                      | 390 (9.2)                     | 1.00 (Reference) | 1.00 (Reference) | 375 (2.9)                            | 1.00 (Reference) | 1.00 (Reference) | 369 (8.7)                                | 1.00 (Reference)        | 1.00 (Reference)        |
| Yes                     | 607 (9.6)                     | 1.05 (0.67-1.63) | 1.14 (0.72-1.82) | 590 (3.2)                            | 0.97 (0.44-2.11) | 1.01 (0.44-2.26) | 581 (9.6)                                | 1.15 (0.73-1.82)        | 1.15 (0.71-1.85)        |
| <b>Ghana/Not obese</b>  |                               |                  |                  |                                      |                  |                  |                                          |                         |                         |
| No                      | 588 (9.5)                     | 1.00 (Reference) | 1.00 (Reference) | 592 (4.7)                            | 1.00 (Reference) | 1.00 (Reference) | 588 (10.0)                               | 1.00 (Reference)        | 1.00 (Reference)        |
| Yes                     | 1324 (8.5)                    | 0.86 (0.61-1.21) | 0.83 (0.59-1.17) | 1331 (3.4)                           | 0.64 (0.39-1.05) | 0.65 (0.39-1.83) | 1321 (9.0)                               | 0.86 (0.61-1.20)        | 0.84 (0.60-1.18)        |
| <b>Ghana/Obese</b>      |                               |                  |                  |                                      |                  |                  |                                          |                         |                         |
| No                      | 144 (13.9)                    | 1.00 (Reference) | 1.00 (Reference) | 144 (3.5)                            | 1.00 (Reference) | 1.00 (Reference) | 144 (14.6)                               | 1.00 (Reference)        | 1.00 (Reference)        |
| Yes                     | 268 (13.1)                    | 0.91 (0.50-1.64) | 0.91 (0.49-1.65) | 267 (3.8)                            | 1.04 (0.34-3.16) | 1.09 (0.35-3.37) | 266 (14.3)                               | 0.94 (0.52-1.68)        | 0.94 (0.52-1.67)        |
| <b>Discrimination</b>   |                               |                  |                  |                                      |                  |                  |                                          |                         |                         |
| <b>Europe/Not obese</b> |                               |                  |                  |                                      |                  |                  |                                          |                         |                         |
| No                      | 1186 (8.4)                    | 1.00 (Reference) | 1.00 (Reference) | 1172 (2.4)                           | 1.00 (Reference) | 1.00 (Reference) | 1150 (9.4)                               | 1.00 (Reference)        | 1.00 (Reference)        |
| Yes                     | 538 (5.9)                     | 0.69 (0.46-1.05) | 0.71 (0.46-1.11) | 532 (1.5)                            | 0.62 (0.28-1.37) | 0.57 (0.24-1.34) | 525 (5.9)                                | <b>0.63 (0.42-0.96)</b> | <b>0.63 (0.41-0.97)</b> |
| <b>Europe/Obese</b>     |                               |                  |                  |                                      |                  |                  |                                          |                         |                         |
| No                      | 709 (8.7)                     | 1.00 (Reference) | 1.00 (Reference) | 691 (3.0)                            | 1.00 (Reference) | 1.00 (Reference) | 678 (8.9)                                | 1.00 (Reference)        | 1.00 (Reference)        |
| Yes                     | 269 (10.0)                    | 1.14 (0.71-1.85) | 1.29 (0.78-2.12) | 256 (3.5)                            | 1.15 (0.50-2.63) | 1.27 (0.54-2.99) | 254 (9.8)                                | 1.13 (0.69-1.86)        | 1.22 (0.73-2.13)        |
| <b>Ghana/Not obese</b>  |                               |                  |                  |                                      |                  |                  |                                          |                         |                         |
| No                      | 1648 (9.1)                    | 1.00 (Reference) | 1.00 (Reference) | 1661 (3.9)                           | 1.00 (Reference) | 1.00 (Reference) | 1646 (9.6)                               | 1.00 (Reference)        | 1.00 (Reference)        |
| Yes                     | 81 (8.6)                      | 1.06 (0.48-2.38) | 1.04 (0.47-2.32) | 81 (2.5)                             | 1.04 (0.48-2.32) | 0.86 (0.20-3.69) | 81 (7.4)                                 | 0.90 (0.38-2.12)        | 0.89 (0.38-2.11)        |
| <b>Ghana/Obese</b>      |                               |                  |                  |                                      |                  |                  |                                          |                         |                         |

|                            |            |                  |                  |            |                  |                  |            |                  |                  |
|----------------------------|------------|------------------|------------------|------------|------------------|------------------|------------|------------------|------------------|
| No                         | 383 (13.8) | 1.00 (Reference) | 1.00 (Reference) | 383 (3.7)  | 1.00 (Reference) | 1.00 (Reference) | 382 (14.9) | 1.00 (Reference) | 1.00 (Reference) |
| Yes                        | 23 (4.4)   | 0.31 (0.04-2.36) | 0.40 (0.05-3.11) | 23 (0.0)   | **** (***_***)   | **** (***_***)   | 23 (4.4)   | 0.29 (0.04-2.22) | 0.34 (0.04-2.66) |
| <b>Stress at home/work</b> |            |                  |                  |            |                  |                  |            |                  |                  |
| <b>Europe/Not obese</b>    |            |                  |                  |            |                  |                  |            |                  |                  |
| Never                      | 855 (7.4)  | 1.00 (Reference) | 1.00 (Reference) | 847 (3.4)  | 1.00 (Reference) | 1.00 (Reference) | 831 (8.2)  | 1.00 (Reference) | 1.00 (Reference) |
| Some stress                | 629 (8.3)  | 1.16 (0.79-1.70) | 1.20 (0.81-1.79) | 627 (1.4)  | 0.52 (0.24-1.12) | 0.47 (0.21-1.07) | 615 (7.9)  | 0.98 (0.66-1.43) | 0.98 (0.65-1.46) |
| Several/Permanent stresses | 247 (6.9)  | 0.93 (0.53-1.62) | 1.15 (0.77-1.72) | 239 (2.3)  | 0.45 (0.13-1.52) | 0.49 (0.15-1.67) | 236 (9.1)  | 0.97 (0.57-1.65) | 1.04 (0.61-1.78) |
| <b>Europe/Obese</b>        |            |                  |                  |            |                  |                  |            |                  |                  |
| Never                      | 472 (9.8)  | 1.00 (Reference) | 1.00 (Reference) | 455 (3.9)  | 1.00 (Reference) | 1.00 (Reference) | 448 (10.3) | 1.00 (Reference) | 1.00 (Reference) |
| Some stress                | 372 (7.5)  | 0.72 (0.44-1.18) | 0.79 (0.47-1.32) | 356 (1.4)  | 0.41 (0.15-1.16) | 0.43 (0.15-1.21) | 352 (9.5)  | 0.94 (0.57-1.53) | 1.05 (0.62-1.76) |
| Several/Permanent stresses | 147 (12.2) | 1.32 (0.74-2.38) | 1.31 (0.72-2.42) | 148 (4.1)  | 1.05 (0.40-2.79) | 1.09 (0.40-2.91) | 144 (8.5)  | 1.36 (0.74-2.49) | 1.41 (0.75-2.64) |
| <b>Ghana/Not obese</b>     |            |                  |                  |            |                  |                  |            |                  |                  |
| Never                      | 537 (9.7)  | 1.00 (Reference) | 1.00 (Reference) | 542 (3.1)  | 1.00 (Reference) | 1.00 (Reference) | 537 (8.9)  | 1.00 (Reference) | 1.00 (Reference) |
| Some stress                | 1055 (8.3) | 0.79 (0.56-1.15) | 0.74 (0.52-1.07) | 1057 (3.9) | 1.16 (0.65-2.09) | 1.21 (0.67-2.18) | 1052 (9.0) | 0.92 (0.64-1.35) | 0.90 (0.62-1.32) |
| Several/permanent stresses | 319 (8.5)  | 0.81 (0.49-1.32) | 0.73 (0.44-1.20) | 323 (4.3)  | 1.34 (0.64-2.83) | 1.43 (0.67-3.04) | 319 (10.7) | 1.12 (0.69-1.79) | 1.09 (0.68-1.76) |
| <b>Ghana/Obese</b>         |            |                  |                  |            |                  |                  |            |                  |                  |
| Never                      | 145 (12.4) | 1.00 (Reference) | 1.00 (Reference) | 146 (4.1)  | 1.00 (Reference) | 1.00 (Reference) | 145 (13.8) | 1.00 (Reference) | 1.00 (Reference) |
| Some stress                | 221 (14.9) | 1.21 (0.64-2.26) | 1.05 (0.55-1.99) | 219 (3.7)  | 0.74 (0.25-2.22) | 0.83 (0.26-2.06) | 219 (15.9) | 1.13 (0.62-2.07) | 1.02 (0.55-1.89) |
| Several/Permanent stresses | 46 (8.7)   | 0.64 (0.20-2.01) | 0.52 (0.16-1.65) | 46 (2.2)   | 0.41 (0.05-3.61) | 0.45 (0.05-4.01) | 46 (8.8)   | 0.55 (0.17-1.71) | 0.47 (0.14-1.50) |
| <b>Depressive symptoms</b> |            |                  |                  |            |                  |                  |            |                  |                  |
| <b>Europe/Not obese</b>    |            |                  |                  |            |                  |                  |            |                  |                  |
| No                         | 1601 (7.9) | 1.00 (Reference) | 1.00 (Reference) | 1586 (2.2) | 1.00 (Reference) | 1.00 (Reference) | 1558 (8.3) | 1.00 (Reference) | 1.00 (Reference) |
| Yes                        | 121 (4.9)  | 0.59 (0.25-1.36) | 0.65 (0.27-1.48) | 117 (1.7)  | 0.79 (0.18-2.35) | 0.86 (0.21-3.80) | 115 (5.22) | 0.58 (0.25-1.35) | 0.64 (0.27-1.49) |
| <b>Europe/Obese</b>        |            |                  |                  |            |                  |                  |            |                  |                  |
| No                         | 899 (9.7)  | 1.00 (Reference) | 1.00 (Reference) | 866 (3.4)  | 1.00 (Reference) | 1.00 (Reference) | 853 (9.4)  | 1.00 (Reference) | 1.00 (Reference) |
| Yes                        | 83 (7.2)   | 0.71 (0.29-1.67) | 0.72 (0.30-1.74) | 83 (1.2)   | 0.46 (0.06-3.52) | 0.46 (0.06-3.57) | 82 (8.5)   | 0.89 (0.40-2.01) | 0.90 (0.40-2.04) |

**Ghana/Not obese**

|     |            |                  |                  |            |                  |                  |            |                  |                  |
|-----|------------|------------------|------------------|------------|------------------|------------------|------------|------------------|------------------|
| No  | 1811 (8.9) | 1.00 (Reference) | 1.00 (Reference) | 1822 (3.9) | 1.00 (Reference) | 1.00 (Reference) | 1808 (9.4) | 1.00 (Reference) | 1.00 (Reference) |
| Yes | 100 (6.0)  | 0.57 (0.24-1.33) | 0.56 (0.24-1.32) | 100 (2.0)  | 0.38 (0.09-1.63) | 0.38 (0.09-1.63) | 100 (8.0)  | 0.69 (0.32-1.46) | 0.69 (0.32-1.47) |

**Ghana/Obese**

|     |            |                  |                  |           |                   |                  |            |                  |                  |
|-----|------------|------------------|------------------|-----------|-------------------|------------------|------------|------------------|------------------|
| No  | 398 (13.8) | 1.00 (Reference) | 1.00 (Reference) | 397 (3.5) | 1.00 (Reference)  | 1.00 (Reference) | 396 (14.7) | 1.00 (Reference) | 1.00 (Reference) |
| Yes | 14 (0.0)   | *** (****_****)  | *** (****_****)  | 14 (7.1)  | 1.76 (0.21-14.89) | 2.14 (0.25-8.78) | 14 (7.1)   | 0.42 (0.05-3.32) | 0.38 (0.05-3.07) |

Model 1, adjusted for age and sex; Model 2, adjusted for age, sex, and educational level for Ghanaians (SSA) and length of stay for those in Europe; Abbreviations: CI, confidence interval; ACR, albumin creatinine ration; eGFR, estimated glomerular filtration rate; CKD, chronic kidney disease; OR, odds ratio, n= total number of Ghanaians living in Ghana and Europe among the various levels of PS constructs; %, proportion of individuals with CKD among the various levels of PS constructs in Ghana and Europe.

**S3: Association of psychosocial stressors (PS) indicators (negative life events, discrimination, stress at work/home and depression) with albuminuria, reduced eGFR and CKD risk for Ghanaians living in Ghana and those living in Europe stratified by diabetes status**

|                           | Albuminuria (ACR $\geq$ 3 mg/mmol) |                  |                  | eGFR < 60 mL/min/1.73 m <sup>2</sup> |                  |                   | High to very high CKD risk (KDIGO, 2012) |                  |                  |
|---------------------------|------------------------------------|------------------|------------------|--------------------------------------|------------------|-------------------|------------------------------------------|------------------|------------------|
|                           | n (%)                              | OR (95% CI)      |                  | n (%)                                | OR (95% CI)      |                   | n cases (%)                              | OR (95% CI)      |                  |
|                           |                                    | Model 1          | Model 2          |                                      | Model 1          | Model 2           |                                          | Model 1          | Model 2          |
| <b>Negative events</b>    |                                    |                  |                  |                                      |                  |                   |                                          |                  |                  |
| <b>Europe/No diabetes</b> |                                    |                  |                  |                                      |                  |                   |                                          |                  |                  |
| No                        | 986 (8.0)                          | 1.00 (Reference) | 1.00 (Reference) | 971 (2.1)                            | 1.00 (Reference) | 1.00 (Reference)  | 957 (7.9)                                | 1.00 (Reference) | 1.00 (Reference) |
| Yes                       | 1359 (7.7)                         | 0.95 (0.70-1.29) | 0.97 (0.71-1.34) | 1340 (2.0)                           | 0.90 (0.50-1.63) | 0.90 (0.48-1.68)  | 1315 (8.1)                               | 1.01 (0.75-1.37) | 0.99 (0.72-1.36) |
| <b>Europe/Diabetes</b>    |                                    |                  |                  |                                      |                  |                   |                                          |                  |                  |
| No                        | 142 (9.9)                          | 1.00 (Reference) | 1.00 (Reference) | 135 (6.7)                            | 1.00 (Reference) | 1.00 (Reference)  | 133 (12.8)                               | 1.00 (Reference) | 1.00 (Reference) |
| Yes                       | 256 (12.5)                         | 1.28 (0.66-2.50) | 1.41 (0.71-2.82) | 247 (4.9)                            | 0.75 (0.29-1.89) | 10.68 (0.27-1.77) | 242 (11.2)                               | 0.87 (0.46-1.69) | 0.96 (0.49-1.88) |
| <b>Ghana/No diabetes</b>  |                                    |                  |                  |                                      |                  |                   |                                          |                  |                  |
| No                        | 683 (9.1)                          | 1.00 (Reference) | 1.00 (Reference) | 687 (4.1)                            | 1.00 (Reference) | 1.00 (Reference)  | 683 (9.8)                                | 1.00 (Reference) | 1.00 (Reference) |
| Yes                       | 1447 (7.7)                         | 0.84 (0.60-1.16) | 0.82 (0.59-1.14) | 1451 (3.1)                           | 0.69 (0.42-1.13) | 0.69 (0.42-1.13)  | 1442 (8.3)                               | 0.82 (0.59-1.12) | 0.80 (0.58-1.10) |
| <b>Ghana/Diabetes</b>     |                                    |                  |                  |                                      |                  |                   |                                          |                  |                  |
| No                        | 49 (28.3)                          | 1.00 (Reference) | 1.00 (Reference) | 49 (10.2)                            | 1.00 (Reference) | 1.00 (Reference)  | 49 (26.4)                                | 1.00 (Reference) | 1.00 (Reference) |
| Yes                       | 148 (24.3)                         | 0.78 (0.37-1.61) | 0.72 (0.34-1.52) | 150 (7.3)                            | 0.55 (0.16-1.81) | 0.57 (0.17-1.88)  | 148 (26.4)                               | 0.93 (0.45-1.97) | 0.90 (0.43-1.92) |
| <b>Discrimination</b>     |                                    |                  |                  |                                      |                  |                   |                                          |                  |                  |
| <b>Europe/No diabetes</b> |                                    |                  |                  |                                      |                  |                   |                                          |                  |                  |
| No                        | 1629 (7.9)                         | 1.00 (Reference) | 1.00 (Reference) | 1609 (2.2)                           | 1.00 (Reference) | 1.00 (Reference)  | 1580 (8.3)                               | 1.00 (Reference) | 1.00 (Reference) |
| Yes                       | 684 (6.7)                          | 0.85 (0.60-1.21) | 0.89 (0.62-1.28) | 669 (1.5)                            | 0.68 (0.33-1.40) | 0.69 (0.32-1.47)  | 661 (7.0)                                | 0.84 (0.59-1.20) | 0.86 (0.59-1.25) |
| <b>Europe/Diabetes</b>    |                                    |                  |                  |                                      |                  |                   |                                          |                  |                  |
| No                        | 270 (11.9)                         | 1.00 (Reference) | 1.00 (Reference) | 258 (5.4)                            | 1.00 (Reference) | 1.00 (Reference)  | 252 (13.1)                               | 1.00 (Reference) | 1.00 (Reference) |
| Yes                       | 126 (11.1)                         | 0.87 (0.44-1.71) | 0.89 (0.45-1.76) | 122 (5.7)                            | 1.29 (0.48-3.45) | 1.25 (0.46-3.37)  | 121 (9.1)                                | 0.68 (0.32-1.40) | 0.69 (0.33-1.42) |
| <b>Ghana/No diabetes</b>  |                                    |                  |                  |                                      |                  |                   |                                          |                  |                  |
| No                        | 1854 (8.4)                         | 1.00 (Reference) | 1.00 (Reference) | 1865 (3.5)                           | 1.00 (Reference) | 1.00 (Reference)  | 1851 (9.0)                               | 1.00 (Reference) | 1.00 (Reference) |
| Yes                       | 99 (8.1)                           | 1.03 (0.49-2.17) | 1.04 (0.49-2.19) | 99 (2.0)                             | 0.79 (0.19-3.33) | 0.78 (0.18-3.29)  | 99 (7.1)                                 | 0.87 (0.39-1.93) | 0.88 (0.39-1.95) |

**Ghana/Diabetes**

|     |            |                  |                  |           |                  |                  |            |                  |                  |
|-----|------------|------------------|------------------|-----------|------------------|------------------|------------|------------------|------------------|
| No  | 180 (26.7) | 1.00 (Reference) | 1.00 (Reference) | 182 (7.7) | 1.00 (Reference) | 1.00 (Reference) | 180 (27.2) | 1.00 (Reference) | 1.00 (Reference) |
| Yes | 5 (0.0)    | **** (***_***)   | 0.40 (0.05-3.11) | 5 (0.0)   | **** (***_***)   | **** (***_***)   | 5 (0.0)    | **** (***_***)   | **** (***_***)   |

**Stress at home/work****Europe/No diabetes**

|                            |            |                  |                  |            |                  |                  |            |                  |                  |
|----------------------------|------------|------------------|------------------|------------|------------------|------------------|------------|------------------|------------------|
| Never                      | 1137 (7.9) | 1.00 (Reference) | 1.00 (Reference) | 1127 (2.3) | 1.00 (Reference) | 1.00 (Reference) | 1102 (8.0) | 1.00 (Reference) | 1.00 (Reference) |
| Some stress                | 860 (7.2)  | 0.90 (0.65-1.27) | 0.96 (0.68-1.36) | 850 (1.2)  | 0.49 (0.24-1.02) | 0.49 (0.22-1.07) | 835 (7.4)  | 0.94 (0.67-1.31) | 0.99 (0.69-1.41) |
| Several/Permanent stresses | 335 (8.4)  | 1.04 (0.67-1.62) | 1.07 (0.68-1.70) | 327 (2.1)  | 0.84 (0.36-1.95) | 0.92 (0.39-2.17) | 322 (9.6)  | 1.20 (0.77-1.85) | 1.28 (0.82-1.99) |

**Europe/Diabetes**

|                            |            |                  |                  |           |                  |                  |            |                  |                  |
|----------------------------|------------|------------------|------------------|-----------|------------------|------------------|------------|------------------|------------------|
| Never                      | 193 (9.8)  | 1.00 (Reference) | 1.00 (Reference) | 184 (8.2) | 1.00 (Reference) | 1.00 (Reference) | 180 (11.7) | 1.00 (Reference) | 1.00 (Reference) |
| Some stress                | 142 (12.7) | 1.22 (0.61-2.45) | 1.38 (0.67-2.81) | 134 (3.0) | 0.43 (0.13-1.39) | 0.40 (0.12-1.29) | 133 (12.0) | 1.04 (0.52-2.09) | 1.13 (0.56-2.32) |
| Several/Permanent stresses | 62 (12.9)  | 1.31 (0.54-3.16) | 1.38 (0.56-3.41) | 63 (3.2)  | 0.49 (0.10-2.29) | 0.46 (0.10-2.23) | 61 (9.8)   | 0.82 (0.31-2.13) | 0.89 (0.34-2.35) |

**Ghana/No diabetes**

|                            |            |                  |                  |            |                  |                  |            |                  |                  |
|----------------------------|------------|------------------|------------------|------------|------------------|------------------|------------|------------------|------------------|
| Never                      | 628 (7.8)  | 1.00 (Reference) | 1.00 (Reference) | 634 (2.7)  | 1.00 (Reference) | 1.00 (Reference) | 628 (7.6)  | 1.00 (Reference) | 1.00 (Reference) |
| Some stress                | 1163 (8.6) | 1.06 (0.74-1.51) | 0.97 (0.67-1.39) | 1163 (3.7) | 1.27 (0.71-2.27) | 1.32 (0.74-2.34) | 1158 (9.3) | 1.15 (0.80-1.65) | 1.10 (0.77-1.58) |
| Several/permanent stresses | 339 (7.4)  | 0.88 (0.53-1.46) | 0.76 (0.46-1.27) | 341 (3.5)  | 1.24 (0.58-2.67) | 1.35 (0.62-2.95) | 339 (8.9)  | 1.07 (0.66-1.73) | 1.00 (0.61-1.64) |

**Ghana/Diabetes**

|                            |            |                         |                         |           |                  |                  |            |                         |                         |
|----------------------------|------------|-------------------------|-------------------------|-----------|------------------|------------------|------------|-------------------------|-------------------------|
| Never                      | 54 (38.9)  | 1.00 (Reference)        | 1.00 (Reference)        | 54 (11.1) | 1.00 (Reference) | 1.00 (Reference) | 54 (37.0)  | 1.00 (Reference)        | 1.00 (Reference)        |
| Some stress                | 116 (18.9) | <b>0.37 (0.37-0.77)</b> | <b>0.35 (0.17-0.75)</b> | 116 (6.0) | 0.47 (0.14-1.60) | 0.45 (0.12-1.55) | 116 (19.8) | <b>0.43 (0.21-0.89)</b> | <b>0.40 (0.19-0.86)</b> |
| Several/Permanent stresses | 26 (25.0)  | 0.44 (0.44-1.29)        | 0.39 (0.13-1.19)        | 28 (10.7) | 0.65 (0.13-3.21) | 0.62 (0.12-3.23) | 26 (30.8)  | 0.69 (0.25-1.93)        | 0.64 (0.22-1.87)        |

**Depressive symptoms****Europe/No diabetes**

|     |            |                  |                  |            |                  |                  |            |                  |                  |
|-----|------------|------------------|------------------|------------|------------------|------------------|------------|------------------|------------------|
| No  | 2154 (8.0) | 1.00 (Reference) | 1.00 (Reference) | 2122 (2.1) | 1.00 (Reference) | 1.00 (Reference) | 2087 (8.1) | 1.00 (Reference) | 1.00 (Reference) |
| Yes | 167 (5.4)  | 0.63 (0.32-1.25) | 0.69 (0.34-1.38) | 163 (2.0)  | 0.65 (0.15-2.72) | 0.72 (0.17-3.04) | 161 (6.8)  | 0.58 (0.25-1.35) | 0.86 (0.46-1.64) |

**Europe/Diabetes**

|                          |            |                  |                  |            |                  |                  |            |                  |                  |
|--------------------------|------------|------------------|------------------|------------|------------------|------------------|------------|------------------|------------------|
| No                       | 351 (12.0) | 1.00 (Reference) | 1.00 (Reference) | 335 (35.9) | 1.00 (Reference) | 1.00 (Reference) | 329 (12.5) | 1.00 (Reference) | 1.00 (Reference) |
| Yes                      | 39 (10.3)  | 0.79 (0.26-1.35) | 0.73 (0.24-2.19) | 39 (2.6)   | 0.49 (0.06-3.97) | 0.49 (0.06-3.99) | 38 (7.9)   | 0.89 (0.40-2.01) | 0.60 (0.17-2.08) |
| <b>Ghana/No diabetes</b> |            |                  |                  |            |                  |                  |            |                  |                  |
| No                       | 2027 (8.3) | 1.00 (Reference) | 1.00 (Reference) | 2035 (3.4) | 1.00 (Reference) | 1.00 (Reference) | 2022 (8.8) | 1.00 (Reference) | 1.00 (Reference) |
| Yes                      | 102 (4.9)  | 0.50 (0.20-1.25) | 0.48 (0.19-1.19) | 102 (2.9)  | 0.64 (0.19-2.13) | 0.67 (0.20-2.21) | 102 (7.8)  | 0.69 (0.32-1.46) | 0.71 (0.34-1.51) |
| <b>Ghana/Diabetes</b>    |            |                  |                  |            |                  |                  |            |                  |                  |
| No                       | 185 (26.5) | 1.00 (Reference) | 1.00 (Reference) | 187 (8.7)  | 1.00 (Reference) | 1.00 (Reference) | 185 (27.6) | 1.00 (Reference) | 1.00 (Reference) |
| Yes                      | 12 (8.3)   | 0.27 (0.03-2.13) | 0.25 (0.03-2.01) | 12 (0.0)   | *** (****_****)  | *** (***_****)   | 12 (8.3)   | 0.42 (0.05-3.32) | 0.27 (0.03-2.19) |

Model 1, adjusted for age and sex; Model 2, adjusted for age, sex, and educational level for Ghanaians (SSA) and length of stay for those in Europe; Abbreviations: CI, confidence interval; ACR, albumin creatinine ration; eGFR, estimated glomerular filtration rate; CKD, chronic kidney disease; OR, odds ratio, n= total number of Ghanaians living in Ghana and Europe among the various levels of PS constructs; %, proportion of individuals with CKD among the various levels of PS constructs in Ghana and Europe.



**S4: Association of psychosocial stressors (PS) indicators (negative life events, discrimination, stress at work/home and depression) with albuminuria, reduced eGFR and CKD risk for Ghanaians living in Ghana and those living in Europe stratified by hypertensive status**

|                               | Albuminuria (ACR ≥ 3 mg/mmol) |                  |                  | eGFR < 60 mL/min/1.73 m <sup>2</sup> |                  |                  | High to very high CKD risk (KDIGO, 2012) |                         |                         |
|-------------------------------|-------------------------------|------------------|------------------|--------------------------------------|------------------|------------------|------------------------------------------|-------------------------|-------------------------|
|                               | n (%)                         | OR (95% CI)      |                  | n (%)                                | OR (95% CI)      |                  | n cases (%)                              | OR (95% CI)             |                         |
|                               |                               | Model 1          | Model 2          |                                      | Model 1          | Model 2          |                                          | Model 1                 | Model 2                 |
| <b>Negative events</b>        |                               |                  |                  |                                      |                  |                  |                                          |                         |                         |
| <b>Europe/No hypertension</b> |                               |                  |                  |                                      |                  |                  |                                          |                         |                         |
| No                            | 568 (6.9)                     | 1.00 (Reference) | 1.00 (Reference) | 562 (1.3)                            | 1.00 (Reference) | 1.00 (Reference) | 551 (7.1)                                | 1.00 (Reference)        | 1.00 (Reference)        |
| Yes                           | 743 (5.0)                     | 0.72 (0.45-1.15) | 0.78 (0.48-1.27) | 740 (0.8)                            | 0.59 (0.19-1.77) | 0.60 (0.20-1.83) | 724 (5.1)                                | 0.71 (0.44-1.13)        | 0.75 (0.46-1.22)        |
| <b>Europe/Hypertension</b>    |                               |                  |                  |                                      |                  |                  |                                          |                         |                         |
| No                            | 560 (9.6)                     | 1.00 (Reference) | 1.00 (Reference) | 544 (4.0)                            | 1.00 (Reference) | 1.00 (Reference) | 539 (10.0)                               | 1.00 (Reference)        | 1.00 (Reference)        |
| Yes                           | 872 (11.4)                    | 1.22 (0.86-1.73) | 1.20 (0.83-1.73) | 847 (3.9)                            | 0.95 (0.54-1.67) | 0.89 (0.49-1.62) | 833 (11.6)                               | 1.19 (0.83-1.69)        | 1.13 (0.78-1.62)        |
| <b>Ghana/No Hypertension</b>  |                               |                  |                  |                                      |                  |                  |                                          |                         |                         |
| No                            | 540 (6.3)                     | 1.00 (Reference) | 1.00 (Reference) | 543 (2.2)                            | 1.00 (Reference) | 1.00 (Reference) | 540 (6.9)                                | 1.00 (Reference)        | 1.00 (Reference)        |
| Yes                           | 1118 (5.6)                    | 0.88 (0.57-1.36) | 0.84 (0.54-1.31) | 1124 (1.9)                           | 0.82 (0.39-1.69) | 0.86 (0.41-1.79) | 1115 (6.4)                               | 0.93 (0.61-1.40)        | 0.90 (0.59-1.36)        |
| <b>Ghana/Hypertension</b>     |                               |                  |                  |                                      |                  |                  |                                          |                         |                         |
| No                            | 192 (21.9)                    | 1.00 (Reference) | 1.00 (Reference) | 193 (10.9)                           | 1.00 (Reference) | 1.00 (Reference) | 192 (22.4)                               | 1.00 (Reference)        | 1.00 (Reference)        |
| Yes                           | 476 (18.1)                    | 0.78 (0.52-1.18) | 0.79 (0.52-1.20) | 476 (6.9)                            | 0.58 (0.32-1.04) | 0.58 (0.33-1.05) | 474 (18.4)                               | 0.77 (0.50-1.16)        | 0.76 (0.51-1.16)        |
| <b>Discrimination</b>         |                               |                  |                  |                                      |                  |                  |                                          |                         |                         |
| <b>Europe/No hypertension</b> |                               |                  |                  |                                      |                  |                  |                                          |                         |                         |
| No                            | 916 (6.3)                     | 1.00 (Reference) | 1.00 (Reference) | 907 (0.8)                            | 1.00 (Reference) | 1.00 (Reference) | 885 (6.8)                                | 1.00 (Reference)        | 1.00 (Reference)        |
| Yes                           | 379 (3.7)                     | 0.60 (0.33-1.09) | 0.65 (0.36-1.21) | 378 (1.1)                            | 1.35 (0.39-4.74) | 1.37 (0.38-4.89) | 374 (3.2)                                | <b>0.47 (0.25-0.89)</b> | <b>0.51 (0.27-0.97)</b> |
| <b>Europe/Hypertension</b>    |                               |                  |                  |                                      |                  |                  |                                          |                         |                         |
| No                            | 983 (10.5)                    | 1.00 (Reference) | 1.00 (Reference) | 960 (4.4)                            | 1.00 (Reference) | 1.00 (Reference) | 947 (10.9)                               | 1.00 (Reference)        | 1.00 (Reference)        |
| Yes                           | 431 (10.7)                    | 1.03 (0.71-1.49) | 1.05 (0.72-1.54) | 413 (3.2)                            | 0.73 (0.38-1.39) | 0.75 (0.38-1.48) | 408 (11.0)                               | 1.03 (0.71-1.49)        | 1.04 (0.71-1.53)        |
| <b>Ghana/No hypertension</b>  |                               |                  |                  |                                      |                  |                  |                                          |                         |                         |
| No                            | 1427 (5.7)                    | 1.00 (Reference) | 1.00 (Reference) | 1437 (2.2)                           | 1.00 (Reference) | 1.00 (Reference) | 1424 (6.5)                               | 1.00 (Reference)        | 1.00 (Reference)        |

|                               |            |                  |                  |           |                         |                         |            |                  |                  |
|-------------------------------|------------|------------------|------------------|-----------|-------------------------|-------------------------|------------|------------------|------------------|
| Yes                           | 81 (7.4)   | 1.30 (0.55-3.09) | 1.30 (0.55-3.10) | 81 (0.0)  | **** (***_***)          | **** (***_***)          | 81 (7.4)   | 1.21 (0.51-2.88) | 1.22 (0.51-2.89) |
| <b>Ghana/Hypertension</b>     |            |                  |                  |           |                         |                         |            |                  |                  |
| No                            | 606 (20.3) | 1.00 (Reference) | 1.00 (Reference) | 609 (7.9) | 1.00 (Reference)        | 1.00 (Reference)        | 606 (20.3) | 1.00 (Reference) | 1.00 (Reference) |
| Yes                           | 23 (8.7)   | 0.38 (0.09-1.68) | 0.40 (0.09-1.74) | 23 (8.7)  | 1.27 (0.28-5.70)        | 1.20 (0.26-5.44)        | 23 (4.4)   | 0.19 (0.03-1.44) | 0.19 (0.03-1.45) |
| <b>Stress at home/work</b>    |            |                  |                  |           |                         |                         |            |                  |                  |
| <b>Europe/No hypertension</b> |            |                  |                  |           |                         |                         |            |                  |                  |
| Never                         | 644 (6.1)  | 1.00 (Reference) | 1.00 (Reference) | 640 (1.3) | 1.00 (Reference)        | 1.00 (Reference)        | 625 (5.8)  | 1.00 (Reference) | 1.00 (Reference) |
| Some stress                   | 468 (4.5)  | 0.74 (0.43-1.27) | 0.81 (0.46-1.43) | 464 (0.4) | 0.37 (0.07-1.74)        | 0.41 (0.09-2.01)        | 457 (4.8)  | 0.84 (0.49-1.45) | 0.91 (0.52-1.60) |
| Several/Permanent stresses    | 192 (6.8)  | 1.07 (0.56-2.05) | 1.19 (0.61-2.29) | 191 (1.6) | 1.49 (0.38-5.78)        | 1.52 (0.39-5.98)        | 186 (8.1)  | 1.38 (0.74-2.60) | 1.49 (0.79-2.84) |
| <b>Europe/Hypertension</b>    |            |                  |                  |           |                         |                         |            |                  |                  |
| Never                         | 686 (10.2) | 1.00 (Reference) | 1.00 (Reference) | 665 (5.4) | 1.00 (Reference)        | 1.00 (Reference)        | 657 (11.1) | 1.00 (Reference) | 1.00 (Reference) |
| Some stress                   | 534 (11.1) | 1.03 (0.71-1.49) | 1.05 (0.72-1.54) | 520 (2.3) | <b>0.49 (0.25-0.96)</b> | <b>0.47 (0.23-0.95)</b> | 511 (10.9) | 0.97 (0.67-1.41) | 0.99 (0.67-0.47) |
| Several/Permanent stresses    | 205 (11.2) | 1.11 (0.67-1.82) | 1.12 (0.67-1.87) | 199 (3.0) | 0.56 (0.23-1.37)        | 0.58 (0.24-1.43)        | 197 (11.2) | 0.99 (0.59-1.64) | 1.03 (0.61-1.74) |
| <b>Ghana/No hypertension</b>  |            |                  |                  |           |                         |                         |            |                  |                  |
| Never                         | 495 (5.5)  | 1.00 (Reference) | 1.00 (Reference) | 498 (1.4) | 1.00 (Reference)        | 1.00 (Reference)        | 495 (5.9)  | 1.00 (Reference) | 1.00 (Reference) |
| Some stress                   | 899 (5.9)  | 1.07 (0.66-1.73) | 0.99 (0.61-1.60) | 901 (2.2) | 1.30 (0.54-3.15)        | 1.39 (0.57-3.37)        | 896 (6.5)  | 1.04 (0.65-1.65) | 1.00 (0.63-1.59) |
| Several/permanent stresses    | 263 (5.7)  | 1.01 (0.53-1.95) | 0.89 (0.46-1.72) | 267 (2.6) | 1.69 (0.58-5.01)        | 1.89 (0.63-5.65)        | 263 (7.6)  | 1.21 (0.67-2.20) | 1.15 (0.63-2.11) |
| <b>Ghana/Hypertension</b>     |            |                  |                  |           |                         |                         |            |                  |                  |
| Never                         | 187 (22.9) | 1.00 (Reference) | 1.00 (Reference) | 190 (8.4) | 1.00 (Reference)        | 1.00 (Reference)        | 187 (20.9) | 1.00 (Reference) | 1.00 (Reference) |
| Some stress                   | 379 (18.2) | 0.74 (0.48-1.14) | 0.68 (0.43-1.05) | 377 (7.9) | 0.95 (0.50-1.80)        | 0.99 (0.51-1.91)        | 377 (19.4) | 0.90 (0.58-1.40) | 0.87 (0.55-1.36) |
| Several/Permanent stresses    | 102 (15.7) | 0.62 (0.33-1.17) | 0.54 (0.28-1.04) | 102 (7.8) | 0.92 (0.37-2.26)        | 0.97 (0.39-2.43)        | 102 (17.7) | 0.79 (0.42-1.49) | 0.76 (0.40-1.43) |
| <b>Depressive symptoms</b>    |            |                  |                  |           |                         |                         |            |                  |                  |
| <b>Europe/No hypertension</b> |            |                  |                  |           |                         |                         |            |                  |                  |

|                              |            |                  |                  |            |                   |                   |             |                   |                  |
|------------------------------|------------|------------------|------------------|------------|-------------------|-------------------|-------------|-------------------|------------------|
| No                           | 1195 (5.9) | 1.00 (Reference) | 1.00 (Reference) | 1187 (1.1) | 1.00 (Reference)  | 1.00 (Reference)  | 1162 (6.0)  | 1.00 (Reference)  | 1.00 (Reference) |
| Yes                          | 101 (3.9)  | 0.59 (0.21-1.65) | 0.64 (0.23-1.82) | 99 (1.0)   | 1.18 (0.15-2.72)  | 1.27 (0.16-10.17) | 98 (5.1)    | 0.77 (0.30-1.97)  | 0.84 (0.33-2.17) |
| <b>Europe/Hypertension</b>   |            |                  |                  |            |                   |                   |             |                   |                  |
| No                           | 1310(10.9) | 1.00 (Reference) | 1.00 (Reference) | 1270 (4.1) | 1.00 (Reference)  | 1.00 (Reference)  | 1254 (11.2) | 1.00 (Reference)  | 1.00 (Reference) |
| Yes                          | 105 (8.6)  | 0.76 (0.37-1.53) | 0.75 (0.37-1.55) | 103 (1.9)  | 0.52 (0.12-2.18)  | 0.56 (0.13-2.38)  | 101 (8.9)   | 0.77 (0.38-1.58)  | 0.80 (0.39-1.63) |
| <b>Ghana/No hypertension</b> |            |                  |                  |            |                   |                   |             |                   |                  |
| No                           | 1575 (5.9) | 1.00 (Reference) | 1.00 (Reference) | 1584 (2.1) | 1.00 (Reference)  | 1.00 (Reference)  | 1572 (6.7)  | 1.00 (Reference)  | 1.00 (Reference) |
| Yes                          | 82 (2.4)   | 0.36 (0.09-1.51) | 0.35 (0.08-1.44) | 82 (1.2)   | 0.39 (0.059-2.95) | 0.39 (0.05-2.97)  | 82 (3.7)    | 0.44 (0.13-1.42)  | 0.43 (0.13-1.40) |
| <b>Ghana/Hypertension</b>    |            |                  |                  |            |                   |                   |             |                   |                  |
| No                           | 636 (19.5) | 1.00 (Reference) | 1.00 (Reference) | 637 (8.2)  | 1.00 (Reference)  | 1.00 (Reference)  | 634 (19.6)  | 1.00 (Reference)  | 1.00 (Reference) |
| Yes                          | 32 (12.5)  | 0.59 (0.20-1.72) | 0.59 (0.20-1.74) | 32 (6.3)   | 0.74 (0.17-3.25)  | 0.76 (0.17-3.33)  | 32 (18.8)   | 0.94 (0.037-2.37) | 0.94 (0.38-2.37) |

Model 1, adjusted for age and sex; Model 2, adjusted for age, sex, and educational level for Ghanaians (SSA) and length of stay for those in Europe; Abbreviations: CI, confidence interval; ACR, albumin creatinine ration; eGFR, estimated glomerular filtration rate; CKD, chronic kidney disease; OR, odds ratio, n= total number of Ghanaians living in Ghana and Europe among the various levels of PS constructs; %, proportion of individuals with CKD among the various levels of PS constructs in Ghana and Europe.
